# Supplementary material for: RNA Pol II Assembly Affects ncRNA Expression
Source: Preprints.org preprint supplement (doi:10.20944/preprints202312.0065.v1), 2023-12-01
Supplement: Supplementary file 1 [file supplementary]

## Sheet: Leyend
A) Reads counts and DEseq2 analysis of rpb1-84 vs. WT
B) Reads counts and DEseq2 analysis of rrp6∆ vs. WT
C) Reads counts and DEseq2 analysis of rpb1-84 rrp6∆ vs. WT
D) Reads counts and DEseq2 analysis of rpb1-84 rrp6∆ vs. rrp6∆
E) Reads counts and DEseq2 analysis of rpb4∆ vs. WT

## Sheet: A) rpb1-84_vs_WT
Name	Type	WT (YFN518)_rep1_counts	WT (YFN518)_rep2_counts	rpb1-84 (YFN519)_rep1_counts	rpb1-84 (YFN519)_rep2_counts	Log2(FC) rpb1-84 vs. WT	P-adj
10F134	XUTs	0	1	1	3	1.96439	NA
10F136	XUTs	34	34	22	24	-0.434538	0.624325
10F143	XUTs	0	1	0	2	0.729186	NA
10F149	XUTs	2	1	0	2	-0.825766	NA
10F15	XUTs	54	61	33	48	-0.424	0.517889
10F151	XUTs	4	3	2	2	-0.681796	NA
10F158	XUTs	0	3	1	2	0.0708506	NA
10F170	XUTs	3	2	3	2	0.206141	NA
10F174	XUTs	2	1	1	1	-0.466129	NA
10F179	XUTs	3	1	0	0	-3.35927	NA
10F18	XUTs	1	0	0	0	-1.37743	NA
10F183	XUTs	1	0	0	0	-1.37743	NA
10F200	XUTs	1	2	2	5	1.21987	NA
10F203	XUTs	20	16	9	12	-0.693965	0.561125
10F209	XUTs	0	0	0	0	NA	NA
10F213	XUTs	1	3	0	1	-1.96611	NA
10F22	XUTs	0	2	1	0	-0.587823	NA
10F25	XUTs	20	21	5	9	-1.51174	0.157569
10F253	XUTs	2	3	1	0	-2.05847	NA
10F293	XUTs	0	0	0	0	NA	NA
10F300	XUTs	0	0	0	0	NA	NA
10F305	XUTs	2	4	1	1	-1.45216	NA
10F310	XUTs	4	7	4	8	0.161904	0.943412
10F32	XUTs	8	8	2	11	-0.414046	0.838815
10F321	XUTs	16	7	7	11	-0.306838	0.855307
10F324	XUTs	4	3	1	1	-1.70387	NA
10F326	XUTs	0	0	0	0	NA	NA
10F37	XUTs	2	0	0	1	-1.05567	NA
10F42	XUTs	16	31	14	18	-0.438859	0.690178
10F44	XUTs	73	68	4	23	-2.46202	3.69837e-05
10F48	XUTs	68	91	12	24	-2.11242	3.87932e-05
10F49	XUTs	163	134	9	26	-3.10014	4.52574e-13
10F50	XUTs	1	2	2	4	1.03752	NA
10F55	XUTs	71	78	51	96	0.0176612	0.980437
10F57	XUTs	11	10	10	29	0.850852	0.46098
10F6	XUTs	0	3	1	1	-0.394679	NA
10F62	XUTs	54	65	36	86	0.0339122	0.964221
10F65	XUTs	1	0	3	0	2.08855	NA
10F67	XUTs	0	0	0	1	1.42429	NA
10F68	XUTs	1	5	7	7	1.40894	0.478258
10F73	XUTs	11	12	5	12	-0.43848	0.786223
10F76	XUTs	18	18	5	15	-0.881855	0.458324
10F82	XUTs	2	7	5	0	-0.33871	0.915032
10F85	XUTs	31	41	13	32	-0.679357	0.39933
10F86	XUTs	101	122	50	97	-0.567517	0.181795
10F87	XUTs	46	63	17	23	-1.35699	0.02801
10F9	XUTs	19	24	0	4	-3.50649	0.00836055
10R101	XUTs	23	23	10	19	-0.633703	0.538094
10R114	XUTs	27	25	13	38	-0.06748	0.953307
10R116	XUTs	9	10	1	4	-1.9715	0.263904
10R117	XUTs	40	29	3	11	-2.34676	0.00617328
10R119	XUTs	5	7	6	20	1.05864	0.472651
10R125	XUTs	8	3	1	4	-1.22426	0.604648
10R128	XUTs	31	47	19	71	0.135585	0.882576
10R131	XUTs	10	19	3	10	-1.18661	0.385799
10R136	XUTs	20	28	17	21	-0.220869	0.848223
10R143	XUTs	0	0	0	0	NA	NA
10R155	XUTs	57	80	22	55	-0.833501	0.129365
10R165	XUTs	4	3	1	4	-0.564502	NA
10R181	XUTs	32	40	2	9	-2.74769	0.0015521
10R186	XUTs	214	223	377	710	1.3532	3.23222e-12
10R197	XUTs	36	23	3	8	-2.44107	0.00973611
10R203	XUTs	46	47	17	25	-1.07587	0.104804
10R206	XUTs	34	45	28	43	-0.0767295	0.93478
10R209	XUTs	19	12	7	14	-0.54876	0.676194
10R21	XUTs	68	51	12	45	-1.13554	0.0663354
10R212	XUTs	20	12	6	14	-0.690114	0.590178
10R228	XUTs	1	1	1	2	0.609424	NA
10R233	XUTs	88	101	18	26	-2.03507	1.20042e-05
10R234	XUTs	1	2	2	7	1.52491	NA
10R237	XUTs	80	79	18	34	-1.58171	0.00119159
10R242	XUTs	15	22	3	13	-1.27337	0.281567
10R245	XUTs	2	1	0	2	-0.825766	NA
10R248	XUTs	0	0	0	0	NA	NA
10R249	XUTs	380	383	317	603	0.304898	0.209773
10R254	XUTs	26	16	3	5	-2.36206	0.0374698
10R257	XUTs	0	0	0	0	NA	NA
10R258	XUTs	1	1	0	0	-2.33255	NA
10R276	XUTs	326	318	210	312	-0.218872	0.5182
10R284	XUTs	4	9	0	2	-2.80181	NA
10R287	XUTs	87	95	79	144	0.336742	0.461081
10R288	XUTs	15	11	8	13	-0.256412	0.866076
10R29	XUTs	35	9	5	18	-1.03322	0.393388
10R39	XUTs	162	162	163	369	0.715915	0.00806023
10R50	XUTs	2	0	2	2	1.11916	NA
10R52	XUTs	48	50	59	110	0.824867	0.0761695
10R6	XUTs	13	16	0	2	-3.91558	0.0289414
10R61	XUTs	0	0	1	4	3.6614	NA
10R62	XUTs	3	3	0	4	-0.81695	NA
10R63	XUTs	1	2	1	2	0.0388419	NA
10R78	XUTs	0	0	0	2	2.11146	NA
10R84	XUTs	78	94	63	128	0.177001	0.746689
10R89	XUTs	4	3	4	5	0.465445	0.855307
10R92	XUTs	40	42	92	154	1.64652	1.55007e-05
10R93	XUTs	2	1	0	0	-2.93531	NA
11F10	XUTs	72	74	45	101	0.00487438	0.995785
11F102	XUTs	2	0	1	6	1.61954	NA
11F103	XUTs	6	11	3	13	-0.165024	0.93531
11F113	XUTs	2	2	0	0	-3.33256	NA
11F136	XUTs	0	1	0	3	1.30032	NA
11F137	XUTs	0	0	0	0	NA	NA
11F153	XUTs	18	14	4	6	-1.62329	0.193748
11F155	XUTs	27	28	22	51	0.407831	0.61951
11F16	XUTs	10	6	14	11	0.837393	0.55024
11F160	XUTs	0	0	0	1	1.42429	NA
11F176	XUTs	23	25	7	6	-1.74592	0.0832156
11F183	XUTs	145	214	140	225	0.101904	0.831834
11F187	XUTs	4	2	0	8	0.121211	NA
11F191	XUTs	4	6	5	8	0.451179	0.833988
11F200	XUTs	150	161	98	172	-0.154151	0.730496
11F204	XUTs	30	31	1	3	-3.92847	0.000584556
11F205	XUTs	2	0	1	1	0.102866	NA
11F207	XUTs	4	2	0	2	-1.77967	NA
11F209	XUTs	49	55	19	52	-0.572902	0.389181
11F210	XUTs	11	17	13	21	0.352252	0.785867
11F216	XUTs	2	0	0	0	-2.38673	NA
11F230	XUTs	430	372	109	273	-1.08987	6.48987e-06
11F231	XUTs	12	12	10	18	0.265122	0.855307
11F244	XUTs	20	37	23	49	0.363629	0.673708
11F25	XUTs	150	140	36	74	-1.38084	9.58797e-05
11F252	XUTs	2	0	0	0	-2.38673	NA
11F258	XUTs	118	166	145	247	0.529804	0.11406
11F259	XUTs	0	0	0	0	NA	NA
11F26	XUTs	39	35	3	12	-2.34915	0.00407453
11F264	XUTs	192	187	115	288	0.07048	0.875324
11F265	XUTs	1	0	0	0	-1.37743	NA
11F27	XUTs	22	26	14	47	0.287542	0.77957
11F270	XUTs	12	10	1	9	-1.27882	0.438108
11F272	XUTs	1	1	0	0	-2.33255	NA
11F281	XUTs	0	0	0	0	NA	NA
11F288	XUTs	1	0	1	0	0.366115	NA
11F290	XUTs	1	0	0	0	-1.37743	NA
11F292	XUTs	0	0	0	1	1.42429	NA
11F298	XUTs	3	2	0	0	-3.6652	NA
11F3	XUTs	10	22	9	20	-0.117983	0.936682
11F300	XUTs	0	0	1	0	1.92724	NA
11F35	XUTs	3	5	4	14	1.1087	0.54236
11F36	XUTs	24	15	13	23	-0.0807631	0.951037
11F43	XUTs	0	1	0	0	-1.3132	NA
11F58	XUTs	16	19	3	9	-1.56632	0.186167
11F64	XUTs	131	146	149	255	0.602264	0.0520443
11F68	XUTs	7	4	11	14	1.2863	0.355584
11F77	XUTs	70	76	60	115	0.295369	0.571459
11F8	XUTs	1	1	0	0	-2.33255	NA
11F84	XUTs	3	5	0	2	-2.14364	NA
11F87	XUTs	20	22	8	18	-0.683715	0.527971
11F88	XUTs	24	25	4	7	-2.11621	0.0337652
11F90	XUTs	72	74	35	49	-0.713156	0.183449
11R107	XUTs	29	25	7	14	-1.34284	0.137936
11R109	XUTs	65	58	45	74	0.00909994	0.992685
11R112	XUTs	3	2	4	6	1.07058	0.648645
11R114	XUTs	91	97	67	131	0.104628	0.854218
11R117	XUTs	96	126	64	148	-0.0614066	0.916891
11R12	XUTs	98	96	70	133	0.0985191	0.860724
11R124	XUTs	257	235	227	422	0.436638	0.104686
11R125	XUTs	4	3	1	0	-2.59429	NA
11R128	XUTs	7	19	2	2	-2.58026	0.105363
11R13	XUTs	238	243	12	39	-3.25494	1.49234e-21
11R130	XUTs	18	16	13	17	-0.0849982	0.951249
11R134	XUTs	34	25	8	33	-0.615964	0.521324
11R139	XUTs	3	5	0	1	-2.96421	NA
11R142	XUTs	0	1	0	0	-1.3132	NA
11R146	XUTs	2	4	1	1	-1.45216	NA
11R158	XUTs	10	13	12	10	0.124397	0.940142
11R163	XUTs	94	106	35	89	-0.700893	0.116611
11R166	XUTs	35	20	6	25	-0.92199	0.350341
11R167	XUTs	3	0	0	1	-1.63655	NA
11R171	XUTs	15	11	0	1	-4.66296	0.0268662
11R173	XUTs	1	4	3	4	0.609661	NA
11R192	XUTs	0	0	0	2	2.11146	NA
11R2	XUTs	8	8	17	34	1.69747	0.0672802
11R208	XUTs	0	0	0	0	NA	NA
11R209	XUTs	0	0	0	0	NA	NA
11R223	XUTs	61	35	19	56	-0.410819	0.597137
11R226	XUTs	43	64	103	146	1.32285	0.000809398
11R246	XUTs	0	0	1	0	1.92724	NA
11R247	XUTs	1	4	2	8	0.934021	NA
11R249	XUTs	24	13	4	7	-1.72449	0.141827
11R260	XUTs	73	94	66	123	0.221704	0.673145
11R262	XUTs	15	20	3	7	-1.7954	0.133598
11R265	XUTs	11	13	2	6	-1.6062	0.284314
11R267	XUTs	11	13	15	18	0.582466	0.629756
11R270	XUTs	0	0	0	0	NA	NA
11R273	XUTs	30	41	24	41	-0.0685688	0.943412
11R274	XUTs	2	5	0	1	-2.76555	NA
11R39	XUTs	11	11	9	9	-0.145015	0.933786
11R48	XUTs	0	0	0	0	NA	NA
11R53	XUTs	0	0	0	0	NA	NA
11R63	XUTs	13	22	1	6	-2.38045	0.0663354
11R7	XUTs	0	0	0	0	NA	NA
11R8	XUTs	2	1	1	3	0.359595	NA
11R81	XUTs	2	5	3	5	0.267684	0.926597
11R82	XUTs	7	12	1	5	-1.72433	0.333384
11R92	XUTs	18	34	6	12	-1.49142	0.120538
11R94	XUTs	14	10	10	16	0.171649	0.912302
11R97	XUTs	0	0	0	0	NA	NA
12F1	XUTs	3	4	0	5	-0.717911	NA
12F109	XUTs	33	34	12	9	-1.50556	0.0752908
12F113	XUTs	8	8	7	17	0.575752	0.702621
12F121	XUTs	9	14	9	8	-0.261527	0.877078
12F134	XUTs	2	4	4	1	0.101193	NA
12F142	XUTs	9	6	3	10	-0.269702	0.896347
12F150	XUTs	39	47	15	34	-0.802241	0.254714
12F154	XUTs	24	16	2	10	-1.82321	0.111683
12F157	XUTs	34	41	12	40	-0.577373	0.480947
12F159	XUTs	12	10	13	23	0.753733	0.516177
12F16	XUTs	19	28	6	9	-1.57605	0.11565
12F160	XUTs	2	2	2	1	-0.167428	NA
12F165	XUTs	40	50	9	27	-1.34685	0.048895
12F180	XUTs	7	3	1	2	-1.73378	NA
12F184	XUTs	21	14	5	15	-0.852204	0.486191
12F185	XUTs	9	17	13	18	0.359167	0.795099
12F188	XUTs	1444	915	143	346	-2.30327	9.58546e-07
12F191	XUTs	63	78	34	54	-0.6125	0.268074
12F193	XUTs	16	9	1	11	-1.23026	0.435278
12F198	XUTs	21	20	9	19	-0.535952	0.62992
12F208	XUTs	66	52	18	37	-1.08773	0.0632083
12F209	XUTs	63	89	11	28	-1.95959	0.000200271
12F215	XUTs	0	2	2	2	1.1974	NA
12F216	XUTs	3	1	0	0	-3.35927	NA
12F221	XUTs	11	10	5	9	-0.546704	0.741272
12F231	XUTs	19	40	30	46	0.456863	0.580143
12F236	XUTs	27	17	2	13	-1.66978	0.12937
12F239	XUTs	0	0	0	3	2.69525	NA
12F247	XUTs	41	28	3	1	-3.9918	0.000301658
12F253	XUTs	12	13	2	4	-2.03391	0.169937
12F257	XUTs	43	70	60	159	0.936521	0.0347544
12F270	XUTs	10	7	0	11	-0.885751	0.665306
12F272	XUTs	7	13	1	5	-1.79505	0.300024
12F287	XUTs	1	0	2	0	1.48617	NA
12F289	XUTs	7	10	2	6	-1.10959	0.542808
12F293	XUTs	34	28	8	24	-0.99308	0.247733
12F317	XUTs	12	13	13	25	0.637304	0.571459
12F33	XUTs	0	0	0	0	NA	NA
12F336	XUTs	19	22	4	7	-1.8551	0.0878503
12F347	XUTs	54	59	16	34	-1.15928	0.0480966
12F359	XUTs	18	26	4	22	-0.860723	0.444305
12F361	XUTs	0	0	0	0	NA	NA
12F375	XUTs	1	0	0	0	-1.37743	NA
12F394	XUTs	0	3	1	2	0.0708506	NA
12F4	XUTs	2	2	0	1	-1.99093	NA
12F404	XUTs	42	36	35	65	0.392888	0.569301
12F46	XUTs	0	0	0	3	2.69525	NA
12F54	XUTs	21	21	3	11	-1.63289	0.128873
12F56	XUTs	2	2	1	0	-1.72684	NA
12F6	XUTs	43	46	15	29	-0.985922	0.143822
12F68	XUTs	4	8	2	4	-0.960116	0.665703
12F70	XUTs	17	17	5	29	-0.131328	0.931108
12F77	XUTs	39	46	47	93	0.749971	0.15245
12F82	XUTs	3	7	2	5	-0.505873	0.843848
12F84	XUTs	59	69	63	165	0.811026	0.0523064
12F85	XUTs	30	28	14	23	-0.594598	0.516593
12F86	XUTs	2	4	1	7	0.279441	NA
12F87	XUTs	0	0	0	0	NA	NA
12F9	XUTs	1	2	0	0	-2.89951	NA
12F90	XUTs	163	182	230	394	0.914022	0.000207673
12F94	XUTs	33	41	16	31	-0.620746	0.435602
12F96	XUTs	0	0	1	0	1.92724	NA
12F98	XUTs	89	74	37	80	-0.471946	0.375817
12R107	XUTs	23	24	11	37	-0.027967	0.982175
12R113	XUTs	85	98	64	118	0.0343116	0.956261
12R126	XUTs	12	11	20	24	1.05732	0.287753
12R135	XUTs	0	2	0	0	-2.27638	NA
12R137	XUTs	0	2	0	0	-2.27638	NA
12R141	XUTs	20	15	18	26	0.407957	0.705061
12R144	XUTs	48	37	6	14	-2.08885	0.0043314
12R149	XUTs	0	0	0	0	NA	NA
12R16	XUTs	148	69	1	11	-4.37692	0.000726894
12R162	XUTs	2	2	0	0	-3.33256	NA
12R167	XUTs	0	0	1	0	1.92724	NA
12R171	XUTs	13	25	29	37	0.922714	0.259916
12R191	XUTs	0	0	0	0	NA	NA
12R197	XUTs	1	3	1	11	1.39426	NA
12R207	XUTs	13	20	5	12	-0.949286	0.449316
12R212	XUTs	11	16	19	28	0.88955	0.360096
12R215	XUTs	2	3	9	4	1.69379	0.393388
12R220	XUTs	2	1	0	2	-0.825766	NA
12R229	XUTs	89	85	40	65	-0.671317	0.165615
12R232	XUTs	3	2	1	2	-0.722593	NA
12R235	XUTs	346	421	242	527	0.016544	0.963371
12R237	XUTs	207	268	87	185	-0.784162	0.00631434
12R239	XUTs	7	11	5	5	-0.702458	0.692912
12R244	XUTs	0	6	2	2	-0.388104	NA
12R249	XUTs	49	52	18	22	-1.23645	0.0541359
12R250	XUTs	10	19	10	22	0.163964	0.910044
12R257	XUTs	0	1	1	0	0.419743	NA
12R265	XUTs	7	18	14	26	0.735555	0.51997
12R267	XUTs	0	1	1	0	0.419743	NA
12R27	XUTs	7	6	6	9	0.27816	0.887524
12R287	XUTs	20	35	9	13	-1.23625	0.180341
12R297	XUTs	51	49	22	29	-0.881443	0.176564
12R299	XUTs	2435	2434	3280	7873	1.17746	7.44267e-18
12R3	XUTs	6	9	5	10	0.0331992	0.987477
12R304	XUTs	1	2	8	2	2.13874	0.361821
12R306	XUTs	45	38	9	41	-0.829609	0.287753
12R31	XUTs	1	2	0	0	-2.89951	NA
12R313	XUTs	0	0	0	0	NA	NA
12R328	XUTs	22	17	10	32	0.0484478	0.969445
12R33	XUTs	10	4	5	11	0.181224	0.93145
12R336	XUTs	84	101	99	206	0.742464	0.0319765
12R337	XUTs	17	14	3	4	-2.08147	0.112289
12R341	XUTs	5	7	3	3	-0.861719	0.695743
12R346	XUTs	28	42	7	16	-1.58958	0.0458654
12R348	XUTs	29	27	9	23	-0.821635	0.366955
12R352	XUTs	186	185	74	195	-0.487543	0.162875
12R354	XUTs	1	2	1	6	1.0928	NA
12R361	XUTs	41	30	12	20	-1.10636	0.159151
12R370	XUTs	76	71	35	81	-0.343591	0.552267
12R385	XUTs	37	49	15	36	-0.751096	0.294255
12R387	XUTs	22	17	13	30	0.134912	0.913668
12R389	XUTs	1	3	1	1	-0.847546	NA
12R391	XUTs	0	1	0	2	0.729186	NA
12R44	XUTs	56	41	10	49	-0.832369	0.261154
12R5	XUTs	9	8	8	17	0.567703	0.696224
12R50	XUTs	0	0	0	0	NA	NA
12R7	XUTs	1	0	1	1	1.12851	NA
12R76	XUTs	58	52	15	34	-1.16384	0.0523972
12R85	XUTs	0	0	0	0	NA	NA
12R96	XUTs	0	0	1	0	1.92724	NA
13F10	XUTs	10	10	2	1	-2.57732	0.154448
13F106	XUTs	16	18	15	28	0.377947	0.735573
13F112	XUTs	0	0	0	0	NA	NA
13F116	XUTs	13	6	0	3	-2.80916	0.155441
13F12	XUTs	1	4	0	1	-2.27874	NA
13F126	XUTs	0	0	0	0	NA	NA
13F129	XUTs	9	9	10	12	0.406779	0.801472
13F137	XUTs	26	22	7	12	-1.29599	0.181522
13F14	XUTs	47	68	47	76	0.169091	0.814236
13F142	XUTs	3	6	0	1	-3.12747	NA
13F146	XUTs	13	16	3	29	-0.0402484	0.981816
13F151	XUTs	33	28	24	24	-0.200101	0.850863
13F153	XUTs	34	33	21	78	0.48096	0.526571
13F160	XUTs	19	21	5	4	-2.01345	0.0765413
13F161	XUTs	32	31	14	22	-0.74616	0.382182
13F171	XUTs	7	5	1	1	-2.5008	NA
13F174	XUTs	0	3	2	9	1.7952	NA
13F179	XUTs	0	1	0	0	-1.3132	NA
13F184	XUTs	8	7	1	6	-1.20645	0.544635
13F191	XUTs	13	17	3	6	-1.70707	0.189975
13F192	XUTs	3	0	2	4	0.984179	NA
13F195	XUTs	74	68	25	54	-0.836235	0.112289
13F199	XUTs	2	2	0	3	-0.650425	NA
13F20	XUTs	5	6	1	4	-1.19551	0.608836
13F201	XUTs	0	0	0	0	NA	NA
13F206	XUTs	12	16	12	16	0.102503	0.944406
13F208	XUTs	14	12	3	17	-0.501109	0.746689
13F209	XUTs	23	25	59	132	1.9973	9.50855e-06
13F213	XUTs	4	2	1	3	-0.635296	NA
13F214	XUTs	14	10	3	13	-0.677012	0.65773
13F217	XUTs	6	4	3	6	-0.136965	0.957391
13F218	XUTs	3	9	7	7	0.397378	0.847464
13F221	XUTs	6	7	8	2	-0.0179877	0.995656
13F222	XUTs	2	9	6	6	0.30751	0.891881
13F229	XUTs	27	36	16	40	-0.175762	0.859372
13F239	XUTs	7	5	11	15	1.2071	0.373288
13F247	XUTs	42	52	63	106	0.908655	0.0506149
13F256	XUTs	42	39	4	17	-2.00706	0.00820835
13F259	XUTs	27	39	17	27	-0.514084	0.554168
13F261	XUTs	25	19	10	21	-0.4956	0.648512
13F272	XUTs	27	26	6	9	-1.76212	0.0580302
13F274	XUTs	4	1	4	7	1.16435	0.61361
13F286	XUTs	24	31	20	37	0.0951253	0.930654
13F294	XUTs	51	53	32	71	-0.00659894	0.995537
13F3	XUTs	194	171	55	141	-0.917195	0.00567375
13F30	XUTs	8	12	2	2	-2.21062	0.203255
13F315	XUTs	7	8	1	5	-1.40005	0.484507
13F321	XUTs	9	7	6	20	0.633724	0.670246
13F333	XUTs	77	71	21	61	-0.88661	0.0924208
13F337	XUTs	15	16	9	5	-0.918893	0.500013
13F339	XUTs	79	89	36	74	-0.588572	0.233266
13F342	XUTs	0	4	1	0	-1.63821	NA
13F349	XUTs	35	31	13	30	-0.619473	0.465979
13F350	XUTs	16	26	12	30	-0.00215774	0.998856
13F354	XUTs	29	43	19	36	-0.346209	0.685665
13F359	XUTs	19	27	9	24	-0.491584	0.645851
13F364	XUTs	10	15	8	11	-0.299442	0.850863
13F370	XUTs	112	107	9	36	-2.3348	3.9802e-07
13F373	XUTs	12	10	6	16	-0.0267413	0.988322
13F375	XUTs	29	27	31	92	1.08665	0.0653693
13F376	XUTs	24	39	59	111	1.47832	0.00170503
13F390	XUTs	19	17	15	18	-0.0132378	0.993888
13F393	XUTs	29	54	48	95	0.824842	0.130885
13F398	XUTs	47	50	27	45	-0.373815	0.597647
13F43	XUTs	5	15	12	14	0.527942	0.719361
13F5	XUTs	3	0	1	0	-1.30913	NA
13F51	XUTs	46	57	19	61	-0.410466	0.564444
13F52	XUTs	13	14	5	5	-1.30804	0.347956
13F54	XUTs	0	0	0	0	NA	NA
13F59	XUTs	2	2	2	1	-0.167428	NA
13F63	XUTs	7	1	1	5	-0.556539	NA
13F65	XUTs	25	34	22	45	0.210713	0.826189
13F80	XUTs	90	95	59	81	-0.308286	0.567823
13F98	XUTs	8	7	1	5	-1.40669	0.481683
13R108	XUTs	569	697	317	509	-0.540595	0.0140717
13R110	XUTs	7	21	9	20	0.0799967	0.959848
13R114	XUTs	28	26	13	34	-0.221327	0.837086
13R117	XUTs	28	22	4	13	-1.5987	0.0997842
13R124	XUTs	13	9	1	0	-4.33454	0.0478072
13R127	XUTs	13	3	1	6	-1.33344	0.514105
13R132	XUTs	37	51	41	52	0.197239	0.811671
13R134	XUTs	28	26	2	7	-2.61332	0.00893645
13R14	XUTs	12	11	21	86	2.11132	0.00269343
13R147	XUTs	1	0	0	0	-1.37743	NA
13R153	XUTs	91	65	25	65	-0.82023	0.122973
13R177	XUTs	74	87	34	74	-0.561847	0.272331
13R182	XUTs	1	0	0	0	-1.37743	NA
13R183	XUTs	0	1	1	2	1.62362	NA
13R188	XUTs	0	0	0	0	NA	NA
13R196	XUTs	76	86	24	27	-1.55526	0.00218449
13R199	XUTs	0	1	2	0	1.52923	NA
13R2	XUTs	24	41	47	112	1.29252	0.01028
13R20	XUTs	64	70	19	40	-1.16507	0.0284365
13R201	XUTs	4	0	2	1	-0.200101	NA
13R216	XUTs	8	8	6	13	0.258587	0.884765
13R217	XUTs	46	56	18	26	-1.13511	0.0721124
13R228	XUTs	51	40	15	41	-0.730687	0.302007
13R232	XUTs	14	15	9	22	0.0885637	0.951249
13R234	XUTs	26	33	9	20	-1.0105	0.244889
13R236	XUTs	1	6	2	2	-0.635402	NA
13R242	XUTs	1	1	1	0	-0.665626	NA
13R245	XUTs	7	9	6	15	0.384159	0.826044
13R253	XUTs	16	8	9	14	-0.00821983	0.997161
13R255	XUTs	8	18	2	8	-1.42136	0.34011
13R27	XUTs	3	9	1	3	-1.58587	0.499572
13R272	XUTs	1	0	0	0	-1.37743	NA
13R275	XUTs	10	8	1	4	-1.90341	0.29418
13R276	XUTs	4	2	2	7	0.504014	NA
13R279	XUTs	36	44	5	21	-1.68026	0.0258523
13R293	XUTs	78	66	70	180	0.769501	0.0592509
13R294	XUTs	52	47	4	8	-3.02469	4.30948e-05
13R297	XUTs	3	4	2	4	-0.191846	NA
13R303	XUTs	8	11	9	15	0.400714	0.797499
13R307	XUTs	18	9	1	5	-2.25116	0.130618
13R313	XUTs	8	15	8	11	-0.172787	0.92134
13R316	XUTs	19	31	4	16	-1.37399	0.166461
13R330	XUTs	28	28	9	21	-0.899446	0.318097
13R340	XUTs	65	81	3	14	-3.13527	4.40406e-07
13R341	XUTs	57	46	8	9	-2.51863	0.000263339
13R356	XUTs	1	0	2	0	1.48617	NA
13R357	XUTs	9	8	1	10	-0.7908	0.677117
13R362	XUTs	19	13	12	28	0.311175	0.804841
13R378	XUTs	2	3	0	1	-2.29846	NA
13R385	XUTs	3	4	1	5	-0.318411	NA
13R388	XUTs	12	11	2	9	-1.14449	0.461873
13R389	XUTs	16	17	13	30	0.382812	0.736282
13R400	XUTs	2	9	5	4	-0.0718121	0.978895
13R402	XUTs	21	14	16	22	0.201966	0.872274
13R411	XUTs	125	143	19	58	-1.82626	2.49952e-06
13R422	XUTs	7	6	0	1	-3.67126	NA
13R47	XUTs	29	22	7	9	-1.59564	0.0956379
13R52	XUTs	1	0	0	2	0.682456	NA
13R69	XUTs	2	3	2	2	-0.172908	NA
13R73	XUTs	15	16	5	14	-0.730241	0.571299
13R87	XUTs	74	90	26	72	-0.76459	0.126285
13R88	XUTs	2	2	1	5	0.4717	NA
13R97	XUTs	7	7	5	4	-0.46253	0.830731
14F101	XUTs	39	52	14	23	-1.23891	0.0655224
14F102	XUTs	89	121	89	219	0.545209	0.149893
14F115	XUTs	5	1	0	0	-3.9533	NA
14F116	XUTs	5	3	1	1	-1.90595	NA
14F118	XUTs	40	37	8	32	-1.01897	0.186167
14F123	XUTs	62	79	17	18	-1.8939	0.000686503
14F126	XUTs	10	1	1	4	-1.24883	0.618783
14F133	XUTs	31	40	19	57	0.0606433	0.950885
14F142	XUTs	46	58	16	51	-0.675826	0.311617
14F166	XUTs	11	12	2	2	-2.42579	0.133598
14F171	XUTs	61	82	48	106	0.120538	0.853697
14F190	XUTs	0	0	0	0	NA	NA
14F20	XUTs	2	4	1	1	-1.45216	NA
14F208	XUTs	4	4	7	7	0.962548	0.609805
14F214	XUTs	10	8	5	6	-0.609664	0.735573
14F219	XUTs	4	2	2	1	-0.783736	NA
14F231	XUTs	75	108	44	108	-0.269948	0.622122
14F234	XUTs	5	22	1	5	-2.207	0.165258
14F236	XUTs	30	51	14	43	-0.537892	0.508709
14F238	XUTs	1	1	0	0	-2.33255	NA
14F240	XUTs	1	3	0	1	-1.96611	NA
14F255	XUTs	10	15	10	18	0.215116	0.882576
14F257	XUTs	10	3	4	1	-1.09011	0.63136
14F259	XUTs	46	77	34	49	-0.472765	0.473155
14F269	XUTs	0	0	0	0	NA	NA
14F280	XUTs	2	3	1	0	-2.05847	NA
14F289	XUTs	61	90	42	88	-0.190654	0.76621
14F290	XUTs	22	33	24	50	0.454052	0.574445
14F292	XUTs	1	0	1	0	0.366115	NA
14F293	XUTs	21	25	16	18	-0.308294	0.790845
14F296	XUTs	9	5	1	4	-1.55695	0.458188
14F302	XUTs	13	10	8	20	0.264497	0.859372
14F303	XUTs	28	32	25	39	0.164766	0.863171
14F306	XUTs	27	22	37	65	1.10311	0.0726635
14F310	XUTs	1	2	5	2	1.55203	NA
14F313	XUTs	24	28	11	29	-0.39433	0.695507
14F319	XUTs	17	9	3	12	-0.881233	0.548614
14F324	XUTs	27	18	8	16	-0.89298	0.392304
14F37	XUTs	21	31	6	12	-1.49747	0.111056
14F39	XUTs	3	6	3	2	-0.633703	0.819845
14F52	XUTs	10	9	1	2	-2.64311	0.154757
14F55	XUTs	63	63	11	40	-1.36102	0.0186085
14F59	XUTs	61	48	7	10	-2.62949	9.25223e-05
14F6	XUTs	23	32	4	11	-1.87992	0.042696
14F61	XUTs	16	24	13	16	-0.347283	0.77957
14F67	XUTs	5	3	1	2	-1.40394	NA
14F97	XUTs	23	35	19	40	0.0496009	0.962355
14F99	XUTs	7	7	1	7	-0.932118	0.65167
14R1	XUTs	0	0	0	0	NA	NA
14R106	XUTs	33	24	9	22	-0.892699	0.326108
14R108	XUTs	3	4	0	3	-1.41503	NA
14R111	XUTs	0	0	0	0	NA	NA
14R114	XUTs	3	7	0	4	-1.5032	NA
14R128	XUTs	5	5	2	9	0.0407797	0.987477
14R130	XUTs	118	159	62	141	-0.439017	0.282817
14R132	XUTs	1	1	1	0	-0.665626	NA
14R136	XUTs	1	1	0	1	-1.00228	NA
14R141	XUTs	39	33	16	26	-0.724629	0.36285
14R153	XUTs	16	18	2	1	-3.37515	0.021776
14R157	XUTs	0	0	0	0	NA	NA
14R162	XUTs	58	53	27	58	-0.374961	0.571299
14R179	XUTs	5	8	2	1	-1.91418	0.392304
14R181	XUTs	2	3	0	6	0.00385344	NA
14R184	XUTs	2	0	1	0	-0.691079	NA
14R185	XUTs	5	5	1	2	-1.71382	NA
14R187	XUTs	34	37	12	27	-0.856166	0.27444
14R192	XUTs	8	4	11	22	1.47215	0.228867
14R194	XUTs	65	74	3	4	-4.26634	3.5164e-08
14R195	XUTs	70	55	18	52	-0.874869	0.136393
14R201	XUTs	2	1	0	1	-1.5978	NA
14R204	XUTs	54	42	9	16	-1.90967	0.00456978
14R205	XUTs	3	3	1	4	-0.338196	NA
14R21	XUTs	12	14	8	17	-0.0390207	0.981376
14R210	XUTs	37	47	39	78	0.507757	0.409576
14R217	XUTs	14	20	6	8	-1.18846	0.327308
14R219	XUTs	49	52	13	38	-1.01509	0.112945
14R220	XUTs	5	4	1	1	-2.07321	NA
14R223	XUTs	21	28	6	21	-0.907584	0.365387
14R229	XUTs	4	2	4	3	0.408628	NA
14R232	XUTs	37	38	6	20	-1.56753	0.039855
14R245	XUTs	4	2	1	1	-1.48544	NA
14R249	XUTs	21	24	11	18	-0.574617	0.583844
14R250	XUTs	6	8	1	4	-1.53488	0.462626
14R264	XUTs	5	4	5	5	0.295364	0.902365
14R269	XUTs	12	16	8	20	-0.00606072	0.997535
14R271	XUTs	17	12	5	15	-0.581386	0.671708
14R284	XUTs	52	73	26	48	-0.711224	0.223281
14R286	XUTs	4	11	2	7	-0.770063	0.704888
14R291	XUTs	7	5	0	2	-2.71765	NA
14R293	XUTs	0	0	0	0	NA	NA
14R300	XUTs	0	0	0	0	NA	NA
14R308	XUTs	29	24	2	10	-2.21274	0.0251373
14R319	XUTs	6	3	0	1	-3.16206	NA
14R327	XUTs	88	92	22	64	-1.09555	0.0186642
14R330	XUTs	63	75	71	63	0.151099	0.842372
14R332	XUTs	2	0	0	0	-2.38673	NA
14R340	XUTs	1	1	0	0	-2.33255	NA
14R344	XUTs	82	76	43	89	-0.242964	0.673145
14R347	XUTs	0	0	0	0	NA	NA
14R348	XUTs	0	0	0	0	NA	NA
14R349	XUTs	0	0	0	0	NA	NA
14R36	XUTs	21	32	3	10	-2.04896	0.0347544
14R40	XUTs	68	95	19	52	-1.2122	0.0145922
14R44	XUTs	3	5	1	3	-1.01883	NA
14R46	XUTs	181	198	89	208	-0.352642	0.318397
14R72	XUTs	2	1	2	2	0.550234	NA
14R74	XUTs	27	30	30	37	0.350227	0.685195
14R75	XUTs	123	115	84	167	0.100528	0.845558
14R89	XUTs	4	3	10	16	1.95712	0.159143
14R9	XUTs	0	1	0	0	-1.3132	NA
14R90	XUTs	5	8	3	12	0.133527	0.951037
15F1	XUTs	6	3	2	11	0.38783	0.870269
15F10	XUTs	143	137	81	115	-0.428343	0.311125
15F102	XUTs	15	20	13	18	-0.0804106	0.953833
15F104	XUTs	3	4	4	14	1.29626	0.478258
15F107	XUTs	2	1	0	0	-2.93531	NA
15F112	XUTs	39	34	13	43	-0.440126	0.602501
15F116	XUTs	0	0	1	0	1.92724	NA
15F129	XUTs	10	9	5	15	0.0306709	0.987106
15F14	XUTs	338	264	67	89	-1.86299	4.05142e-10
15F141	XUTs	2	2	1	3	-0.0386622	NA
15F144	XUTs	30	28	13	26	-0.550327	0.547104
15F148	XUTs	0	0	0	0	NA	NA
15F156	XUTs	47	60	29	58	-0.268662	0.702621
15F157	XUTs	0	0	1	0	1.92724	NA
15F161	XUTs	0	0	0	1	1.42429	NA
15F163	XUTs	14	18	4	14	-0.87803	0.495342
15F18	XUTs	567	615	389	713	-0.0564755	0.852872
15F180	XUTs	6	0	1	0	-2.37001	NA
15F197	XUTs	40	58	33	43	-0.256853	0.74617
15F200	XUTs	69	99	61	115	0.110756	0.856848
15F203	XUTs	3	6	0	4	-1.36095	NA
15F206	XUTs	0	0	0	0	NA	NA
15F21	XUTs	135	159	38	90	-1.19714	0.000645847
15F217	XUTs	54	53	19	37	-0.906789	0.137456
15F232	XUTs	30	39	16	49	-0.125206	0.898801
15F238	XUTs	17	9	3	6	-1.52264	0.289584
15F245	XUTs	19	20	6	10	-1.23482	0.261154
15F249	XUTs	5	3	1	1	-1.90595	NA
15F26	XUTs	5	5	0	0	-4.65449	NA
15F263	XUTs	0	1	0	1	0.00498896	NA
15F265	XUTs	1	1	1	5	1.46306	NA
15F269	XUTs	66	57	48	112	0.372682	0.504042
15F27	XUTs	0	6	1	1	-1.40445	NA
15F281	XUTs	0	0	0	0	NA	NA
15F286	XUTs	2	2	2	3	0.396652	NA
15F288	XUTs	24	34	12	23	-0.689822	0.450467
15F296	XUTs	15	19	9	8	-0.840631	0.503483
15F307	XUTs	106	90	40	81	-0.678069	0.136393
15F309	XUTs	23	28	4	9	-1.95755	0.0424314
15F312	XUTs	0	0	2	1	3.33025	NA
15F318	XUTs	0	0	0	0	NA	NA
15F33	XUTs	5	13	3	4	-1.25766	0.490309
15F331	XUTs	42	54	23	59	-0.23834	0.760612
15F345	XUTs	11	11	11	14	0.290075	0.848214
15F381	XUTs	1	1	0	5	1.03119	NA
15F388	XUTs	33	37	14	15	-1.14872	0.151245
15F39	XUTs	5	2	4	3	0.179127	0.950885
15F42	XUTs	3	2	3	10	1.30737	0.54894
15F428	XUTs	0	0	0	3	2.69525	NA
15F431	XUTs	1	1	1	0	-0.665626	NA
15F435	XUTs	14	10	3	1	-2.38297	0.140818
15F436	XUTs	94	112	44	75	-0.737101	0.0896658
15F444	XUTs	56	42	11	30	-1.28434	0.0510042
15F448	XUTs	29	32	4	8	-2.32046	0.00940721
15F45	XUTs	16	11	2	1	-3.03881	0.0585158
15F453	XUTs	10	24	14	52	0.890148	0.341441
15F458	XUTs	39	45	1	5	-3.82622	4.41887e-05
15F473	XUTs	3	3	2	1	-0.76907	NA
15F479	XUTs	25	28	29	45	0.55536	0.477413
15F5	XUTs	3	0	0	2	-0.876402	NA
15F6	XUTs	33	28	15	43	-0.111436	0.916891
15F89	XUTs	38	36	17	50	-0.183153	0.84285
15F9	XUTs	44	51	121	280	2.07639	4.24717e-11
15F94	XUTs	5	5	9	11	1.11828	0.476826
15R10	XUTs	6	16	11	14	0.313319	0.841081
15R101	XUTs	28	35	5	16	-1.61344	0.0566643
15R116	XUTs	17	10	2	14	-0.900826	0.542808
15R12	XUTs	1	2	0	2	-0.794649	NA
15R137	XUTs	3	1	0	4	-0.280444	NA
15R148	XUTs	0	2	2	6	1.98368	NA
15R149	XUTs	8	9	5	13	0.0663429	0.970864
15R150	XUTs	58	70	30	54	-0.5619	0.337167
15R157	XUTs	0	0	0	0	NA	NA
15R162	XUTs	5	10	11	28	1.37165	0.224057
15R169	XUTs	95	133	82	147	0.0591281	0.918924
15R172	XUTs	11	13	7	8	-0.558819	0.715061
15R175	XUTs	18	24	13	13	-0.544064	0.631658
15R177	XUTs	4	4	7	4	0.712511	0.745957
15R178	XUTs	12	5	2	6	-1.1399	0.538192
15R185	XUTs	33	39	2	4	-3.55855	0.00023722
15R187	XUTs	25	14	13	28	0.0704552	0.957391
15R189	XUTs	12	13	1	11	-1.21093	0.435993
15R19	XUTs	19	23	11	31	-0.0273942	0.983275
15R194	XUTs	27	24	23	27	0.0901492	0.936788
15R211	XUTs	7	6	2	15	0.22316	0.919595
15R218	XUTs	1	2	0	2	-0.794649	NA
15R219	XUTs	13	7	2	4	-1.72889	0.304864
15R220	XUTs	0	1	0	0	-1.3132	NA
15R225	XUTs	0	0	0	0	NA	NA
15R229	XUTs	7	9	17	27	1.53329	0.122308
15R235	XUTs	6	8	3	5	-0.748904	0.712323
15R243	XUTs	5	6	5	3	-0.229351	0.929315
15R247	XUTs	7	4	2	1	-1.68836	0.4854
15R249	XUTs	145	184	66	94	-0.951214	0.00708086
15R264	XUTs	1	3	8	8	2.17908	0.239961
15R265	XUTs	24	39	26	35	0.0612545	0.953833
15R284	XUTs	1	0	0	0	-1.37743	NA
15R289	XUTs	6	8	3	3	-1.08941	0.589012
15R29	XUTs	24	36	11	52	-0.0318197	0.978895
15R293	XUTs	5	4	0	3	-1.7715	NA
15R294	XUTs	0	0	0	1	1.42429	NA
15R314	XUTs	47	40	21	40	-0.484114	0.516593
15R327	XUTs	21	16	10	26	-0.0648133	0.962007
15R33	XUTs	134	141	47	111	-0.800947	0.0297173
15R34	XUTs	23	23	10	24	-0.440839	0.676674
15R341	XUTs	0	3	0	1	-1.53296	NA
15R344	XUTs	1	6	2	0	-1.36528	NA
15R346	XUTs	24	10	3	1	-2.91854	0.0422257
15R355	XUTs	3	3	0	0	-3.91753	NA
15R366	XUTs	6	17	3	14	-0.511533	0.766987
15R372	XUTs	111	89	28	47	-1.37075	0.00198047
15R380	XUTs	2	8	0	2	-2.43686	NA
15R385	XUTs	12	8	16	33	1.30426	0.172537
15R399	XUTs	3	2	2	4	0.27876	NA
15R4	XUTs	33	51	62	150	1.33264	0.00190746
15R403	XUTs	0	0	0	0	NA	NA
15R427	XUTs	89	109	100	180	0.549198	0.142503
15R430	XUTs	6	9	11	23	1.20482	0.30988
15R432	XUTs	57	79	24	59	-0.713015	0.202005
15R433	XUTs	30	28	29	51	0.51035	0.500718
15R440	XUTs	2	2	0	3	-0.650425	NA
15R442	XUTs	48	59	23	48	-0.569644	0.376959
15R451	XUTs	4	0	1	2	-0.438719	NA
15R461	XUTs	2	3	0	0	-3.64371	NA
15R466	XUTs	22	18	2	7	-2.19079	0.0561274
15R47	XUTs	11	10	7	13	-0.0358943	0.984075
15R471	XUTs	1	0	0	0	-1.37743	NA
15R475	XUTs	2	3	0	1	-2.29846	NA
15R477	XUTs	19	9	7	12	-0.527204	0.714745
15R485	XUTs	10	16	9	16	-0.00166991	0.99926
15R486	XUTs	8	3	1	10	-0.20063	0.938698
15R489	XUTs	1	0	0	0	-1.37743	NA
15R490	XUTs	0	0	0	0	NA	NA
15R491	XUTs	0	0	0	0	NA	NA
15R51	XUTs	65	66	28	52	-0.675363	0.227603
15R54	XUTs	2	8	4	3	-0.293357	0.913453
15R55	XUTs	0	0	0	0	NA	NA
15R56	XUTs	7	5	0	2	-2.71765	NA
15R65	XUTs	7	8	1	0	-3.74546	0.128078
15R66	XUTs	57	65	36	45	-0.481262	0.454226
15R7	XUTs	13	11	8	7	-0.520399	0.741884
15R8	XUTs	123	162	86	178	-0.0856503	0.863969
15R84	XUTs	3	1	0	2	-1.23262	NA
15R92	XUTs	3	0	0	0	-2.97191	NA
15R99	XUTs	19	14	3	8	-1.60507	0.19303
16F1	XUTs	0	2	0	0	-2.27638	NA
16F100	XUTs	6	4	0	0	-4.66521	NA
16F113	XUTs	4	2	0	5	-0.528298	NA
16F117	XUTs	9	11	21	66	2.06572	0.00533451
16F13	XUTs	2	1	0	0	-2.93531	NA
16F134	XUTs	0	5	0	2	-1.48578	NA
16F137	XUTs	4	7	2	10	0.0273937	0.992915
16F139	XUTs	3	8	5	8	0.325355	0.880417
16F141	XUTs	1	0	1	3	1.93045	NA
16F145	XUTs	102	93	18	36	-1.83165	4.15398e-05
16F148	XUTs	30	25	19	35	0.00780011	0.995785
16F151	XUTs	31	54	33	67	0.26869	0.723446
16F155	XUTs	21	4	0	3	-3.21666	0.0829264
16F17	XUTs	16	26	6	10	-1.3312	0.213776
16F175	XUTs	14	14	4	10	-1.00787	0.459351
16F176	XUTs	5	7	10	10	0.899629	0.564444
16F178	XUTs	14	12	11	38	0.841636	0.419692
16F180	XUTs	25	47	31	48	0.220301	0.808389
16F182	XUTs	100	121	37	77	-0.932672	0.0223107
16F183	XUTs	12	16	6	8	-0.907157	0.508174
16F184	XUTs	2	0	0	2	-0.308594	NA
16F19	XUTs	6	4	3	7	-0.0100936	0.997535
16F193	XUTs	0	0	0	0	NA	NA
16F197	XUTs	10	5	3	4	-1.03113	0.59502
16F206	XUTs	0	0	0	0	NA	NA
16F208	XUTs	8	3	4	3	-0.486264	0.842712
16F213	XUTs	57	71	25	70	-0.454885	0.462685
16F224	XUTs	2	2	0	7	0.522841	NA
16F226	XUTs	97	93	47	112	-0.263673	0.61361
16F227	XUTs	27	26	9	18	-0.950293	0.303316
16F229	XUTs	14	23	12	35	0.316321	0.785772
16F233	XUTs	33	27	10	21	-0.941203	0.276796
16F236	XUTs	10	4	0	1	-3.79624	0.139565
16F238	XUTs	124	125	62	105	-0.523381	0.202062
16F24	XUTs	1	0	0	3	1.25742	NA
16F243	XUTs	40	51	26	50	-0.223433	0.782272
16F247	XUTs	91	95	49	74	-0.523029	0.284532
16F27	XUTs	13	11	1	3	-2.60245	0.105677
16F272	XUTs	8	7	4	9	-0.204417	0.923933
16F274	XUTs	1	0	0	0	-1.37743	NA
16F28	XUTs	45	50	11	33	-1.14064	0.0843255
16F280	XUTs	55	49	32	74	0.0240023	0.977926
16F292	XUTs	25	29	10	22	-0.742005	0.429188
16F30	XUTs	143	149	91	181	-0.0761338	0.876733
16F31	XUTs	49	64	16	36	-1.10665	0.0622746
16F310	XUTs	15	6	4	13	-0.377382	0.833988
16F311	XUTs	2	6	0	0	-4.30531	NA
16F324	XUTs	29	37	75	137	1.73091	2.86984e-05
16F332	XUTs	14	25	2	1	-3.56636	0.0122744
16F334	XUTs	8	4	1	4	-1.34087	0.552177
16F339	XUTs	1	0	3	8	3.41856	NA
16F348	XUTs	9	10	0	5	-2.09199	0.263737
16F35	XUTs	68	75	44	84	-0.125336	0.851493
16F353	XUTs	42	49	2	5	-3.68769	2.08375e-05
16F356	XUTs	1	2	1	2	0.0388419	NA
16F36	XUTs	0	0	0	0	NA	NA
16F363	XUTs	3	1	0	3	-0.677088	NA
16F376	XUTs	71	95	42	82	-0.385634	0.475957
16F377	XUTs	96	115	97	205	0.535605	0.139505
16F383	XUTs	17	23	8	18	-0.608643	0.587813
16F384	XUTs	0	0	0	0	NA	NA
16F47	XUTs	53	54	30	40	-0.518361	0.442222
16F65	XUTs	22	26	6	29	-0.553934	0.606192
16F73	XUTs	0	0	0	0	NA	NA
16F81	XUTs	3	2	2	2	-0.191083	NA
16F86	XUTs	0	0	0	0	NA	NA
16F88	XUTs	42	53	27	50	-0.260488	0.73454
16F95	XUTs	29	30	20	50	0.233526	0.804841
16F98	XUTs	7	7	2	2	-1.69502	0.414075
16R132	XUTs	0	0	0	0	NA	NA
16R143	XUTs	20	19	6	18	-0.737125	0.518914
16R144	XUTs	0	2	0	0	-2.27638	NA
16R15	XUTs	16	5	1	3	-2.43755	0.169913
16R165	XUTs	10	13	2	1	-2.78107	0.103729
16R166	XUTs	19	17	5	15	-0.884672	0.457374
16R174	XUTs	18	17	2	2	-3.04983	0.0251373
16R179	XUTs	1	4	0	5	-0.233625	NA
16R18	XUTs	1	0	0	0	-1.37743	NA
16R184	XUTs	49	59	23	70	-0.255599	0.730197
16R190	XUTs	9	13	1	1	-3.3773	0.0755898
16R192	XUTs	13	24	3	7	-1.8676	0.116025
16R201	XUTs	9	4	3	6	-0.524786	0.815641
16R204	XUTs	15	18	2	7	-1.90766	0.129071
16R21	XUTs	0	0	0	0	NA	NA
16R218	XUTs	2	1	1	10	1.65971	NA
16R225	XUTs	39	33	19	52	-0.0522018	0.95842
16R235	XUTs	25	14	12	21	-0.20718	0.871822
16R239	XUTs	17	17	5	10	-1.15705	0.335441
16R25	XUTs	18	31	12	36	-0.0598543	0.960603
16R262	XUTs	3	3	0	7	-0.0466959	NA
16R270	XUTs	34	14	2	16	-1.57216	0.159143
16R274	XUTs	7	8	4	2	-1.09238	0.581412
16R276	XUTs	0	0	0	0	NA	NA
16R278	XUTs	18	19	6	22	-0.466886	0.703237
16R283	XUTs	52	36	12	26	-1.20884	0.083565
16R288	XUTs	93	75	5	11	-3.38303	1.16014e-08
16R29	XUTs	8	3	0	2	-2.61722	NA
16R295	XUTs	11	12	4	8	-0.912833	0.546131
16R299	XUTs	3	1	2	0	-0.582966	NA
16R30	XUTs	6	9	5	11	0.11027	0.956654
16R307	XUTs	12	20	12	39	0.624268	0.546915
16R310	XUTs	52	60	11	22	-1.73612	0.0038228
16R314	XUTs	24	14	10	18	-0.411573	0.740785
16R343	XUTs	3	12	3	13	0.0244105	0.992915
16R346	XUTs	26	21	14	31	-0.0605782	0.959773
16R348	XUTs	326	368	386	796	0.789565	3.15207e-05
16R349	XUTs	3	5	0	0	-4.31907	NA
16R351	XUTs	9	12	1	3	-2.40053	0.161621
16R354	XUTs	26	22	9	36	-0.180807	0.879478
16R359	XUTs	4	2	0	3	-1.22778	NA
16R363	XUTs	7	5	4	5	-0.320493	0.887671
16R364	XUTs	18	11	7	25	0.0613857	0.966251
16R366	XUTs	34	26	3	11	-2.14669	0.0183074
16R375	XUTs	62	66	50	108	0.315824	0.56759
16R376	XUTs	31	23	6	15	-1.37661	0.133453
16R399	XUTs	14	19	8	20	-0.24173	0.859372
16R402	XUTs	0	0	1	1	2.61267	NA
16R404	XUTs	13	11	12	12	0.145645	0.929605
16R410	XUTs	21	13	1	6	-2.36565	0.0709125
16R419	XUTs	52	51	19	45	-0.689357	0.286242
16R422	XUTs	57	74	21	68	-0.602801	0.31792
16R425	XUTs	0	0	0	0	NA	NA
16R54	XUTs	25	23	21	46	0.487649	0.565552
16R59	XUTs	2	5	0	0	-4.11664	NA
16R6	XUTs	7	14	6	25	0.481347	0.743872
16R66	XUTs	3	0	1	1	-0.491549	NA
16R67	XUTs	4	5	2	2	-1.03876	NA
16R69	XUTs	63	59	13	33	-1.41764	0.0127229
16R8	XUTs	38	43	27	68	0.217419	0.785176
16R82	XUTs	21	27	10	19	-0.689152	0.495716
16R9	XUTs	61	62	20	58	-0.690043	0.246933
16R94	XUTs	6	11	1	5	-1.56634	0.408883
16R98	XUTs	3	2	0	3	-0.968976	NA
1F1	XUTs	10	12	2	1	-2.71629	0.118277
1F11	XUTs	8	8	2	0	-2.71472	0.211007
1F12	XUTs	5	6	3	13	0.447339	0.831834
1F14	XUTs	75	83	66	140	0.398744	0.391739
1F15	XUTs	22	24	2	4	-2.91394	0.0101286
1F23	XUTs	23	21	6	8	-1.57644	0.126344
1F25	XUTs	18	25	21	25	0.224372	0.842372
1F3	XUTs	2	3	0	1	-2.29846	NA
1F32	XUTs	46	32	4	13	-2.23594	0.00481922
1F4	XUTs	45	54	66	83	0.710433	0.178655
1F60	XUTs	30	34	12	20	-0.945609	0.252355
1F72	XUTs	30	50	27	52	0.0245562	0.980437
1F75	XUTs	34	31	5	4	-2.7408	0.00292423
1F89	XUTs	80	86	64	189	0.562626	0.191391
1F90	XUTs	141	184	86	171	-0.306844	0.440384
1F93	XUTs	34	37	21	38	-0.224194	0.809336
1R101	XUTs	0	0	0	0	NA	NA
1R103	XUTs	3	1	0	0	-3.35927	NA
1R107	XUTs	0	0	0	2	2.11146	NA
1R108	XUTs	9	2	4	2	-0.656074	0.798066
1R16	XUTs	38	27	7	12	-1.73977	0.0374225
1R18	XUTs	192	168	63	126	-0.909217	0.00528567
1R2	XUTs	0	2	0	0	-2.27638	NA
1R20	XUTs	0	0	0	0	NA	NA
1R35	XUTs	14	16	15	19	0.290657	0.825304
1R39	XUTs	1	4	0	2	-1.48799	NA
1R40	XUTs	2	1	0	0	-2.93531	NA
1R5	XUTs	2	3	3	3	0.419769	NA
1R55	XUTs	8	10	10	16	0.600157	0.665703
1R79	XUTs	6	4	2	3	-0.943222	0.696767
1R80	XUTs	0	1	0	0	-1.3132	NA
1R83	XUTs	37	69	20	44	-0.704339	0.297106
1R85	XUTs	2	2	4	12	1.95177	0.324175
1R87	XUTs	14	10	5	16	-0.249479	0.87924
1R90	XUTs	12	6	4	3	-1.20956	0.503533
1R91	XUTs	22	20	8	30	-0.219747	0.859372
1R99	XUTs	3	2	2	0	-0.911951	NA
2F101	XUTs	7	10	4	20	0.387982	0.825591
2F106	XUTs	17	19	2	10	-1.65995	0.165477
2F116	XUTs	35	36	6	7	-2.36621	0.00432234
2F118	XUTs	4	0	1	2	-0.438719	NA
2F123	XUTs	0	0	0	0	NA	NA
2F125	XUTs	40	44	8	19	-1.63352	0.0205674
2F127	XUTs	2	7	6	4	0.402305	0.866076
2F132	XUTs	68	56	11	24	-1.81771	0.00162392
2F134	XUTs	53	45	2	7	-3.46276	1.66044e-05
2F136	XUTs	50	60	27	77	-0.111602	0.885839
2F141	XUTs	40	61	36	79	0.20474	0.77957
2F143	XUTs	4	6	1	2	-1.70381	NA
2F145	XUTs	120	139	64	127	-0.410363	0.321153
2F146	XUTs	60	59	29	81	-0.145483	0.84404
2F149	XUTs	15	16	9	25	0.104839	0.940301
2F150	XUTs	92	105	31	70	-0.955339	0.0276004
2F154	XUTs	74	59	18	52	-0.963322	0.0870313
2F158	XUTs	17	7	0	2	-3.68695	0.058247
2F161	XUTs	38	49	3	11	-2.65942	0.00053116
2F166	XUTs	32	28	7	24	-1.00743	0.252209
2F169	XUTs	0	0	0	0	NA	NA
2F170	XUTs	0	0	0	0	NA	NA
2F177	XUTs	123	105	106	203	0.467699	0.213515
2F190	XUTs	150	119	64	121	-0.511935	0.215219
2F197	XUTs	53	45	15	18	-1.47663	0.025273
2F2	XUTs	10	14	7	10	-0.410211	0.798279
2F206	XUTs	23	24	11	30	-0.221617	0.84629
2F221	XUTs	3	9	6	6	0.172619	0.939628
2F225	XUTs	11	6	2	9	-0.729602	0.695743
2F240	XUTs	3	2	1	9	0.808449	NA
2F242	XUTs	165	185	69	119	-0.845031	0.00943053
2F252	XUTs	1	1	0	1	-1.00228	NA
2F258	XUTs	7	3	0	0	-4.67594	NA
2F270	XUTs	20	14	15	17	0.0310969	0.9832
2F274	XUTs	1	0	2	4	2.59394	NA
2F282	XUTs	243	301	202	580	0.480869	0.0885658
2F291	XUTs	0	0	0	0	NA	NA
2F313	XUTs	15	16	0	3	-3.45404	0.0296941
2F319	XUTs	3	0	1	2	-0.0214203	NA
2F32	XUTs	1	4	4	8	1.31062	0.556456
2F340	XUTs	62	72	28	79	-0.353045	0.56759
2F43	XUTs	13	17	5	4	-1.58146	0.233266
2F50	XUTs	18	30	4	18	-1.19436	0.247733
2F78	XUTs	20	30	8	23	-0.710368	0.480947
2F87	XUTs	8	20	10	15	-0.0680498	0.965708
2F89	XUTs	13	2	0	2	-3.06773	0.205112
2F91	XUTs	23	10	7	15	-0.591496	0.650691
2F93	XUTs	10	7	6	5	-0.466524	0.812685
2R103	XUTs	2	2	2	0	-0.562522	NA
2R109	XUTs	32	17	22	37	0.310483	0.759852
2R11	XUTs	5	3	2	6	-0.0510356	0.986103
2R114	XUTs	71	94	28	59	-0.900742	0.0633212
2R121	XUTs	14	11	6	8	-0.754586	0.601707
2R127	XUTs	64	58	27	55	-0.554628	0.357033
2R136	XUTs	31	12	26	42	0.707851	0.430489
2R142	XUTs	0	0	0	0	NA	NA
2R154	XUTs	25	37	6	14	-1.61887	0.0578363
2R166	XUTs	0	2	0	0	-2.27638	NA
2R170	XUTs	18	16	3	8	-1.64289	0.173978
2R172	XUTs	14	10	6	11	-0.467418	0.76478
2R178	XUTs	28	37	8	19	-1.26075	0.122907
2R183	XUTs	4	12	4	10	-0.181546	0.932796
2R200	XUTs	4	7	5	2	-0.356171	0.885897
2R226	XUTs	68	54	23	47	-0.786749	0.178807
2R246	XUTs	6	4	1	2	-1.72377	NA
2R256	XUTs	82	117	55	84	-0.436521	0.383176
2R264	XUTs	26	33	7	11	-1.65184	0.0578363
2R267	XUTs	20	21	15	26	0.0500468	0.966251
2R271	XUTs	0	1	0	0	-1.3132	NA
2R272	XUTs	2	0	4	0	1.54311	NA
2R288	XUTs	11	13	10	22	0.426463	0.746689
2R296	XUTs	0	0	0	0	NA	NA
2R299	XUTs	6	8	5	10	0.130124	0.949702
2R307	XUTs	28	24	10	43	-0.0723398	0.951305
2R31	XUTs	34	20	1	21	-1.50597	0.165449
2R314	XUTs	0	0	0	1	1.42429	NA
2R318	XUTs	1	1	0	2	-0.246638	NA
2R334	XUTs	36	42	0	7	-3.5633	0.000205584
2R342	XUTs	150	200	89	181	-0.346011	0.357033
2R343	XUTs	70	73	77	144	0.66616	0.105075
2R344	XUTs	7	13	16	44	1.56209	0.077142
2R349	XUTs	2	4	1	0	-2.33006	NA
2R39	XUTs	0	0	2	0	2.9905	NA
2R43	XUTs	2	11	6	4	-0.123653	0.959824
2R48	XUTs	79	85	40	72	-0.506863	0.324507
2R56	XUTs	7	12	3	7	-0.911873	0.591648
2R58	XUTs	0	0	0	2	2.11146	NA
2R61	XUTs	0	1	2	0	1.52923	NA
2R63	XUTs	71	60	27	72	-0.431245	0.485012
2R65	XUTs	186	290	272	596	0.883297	0.00028971
2R67	XUTs	0	1	0	0	-1.3132	NA
2R74	XUTs	3	4	4	1	-0.137781	NA
2R82	XUTs	6	5	3	12	0.358246	0.865053
2R85	XUTs	203	242	114	191	-0.484017	0.12509
2R86	XUTs	0	0	0	0	NA	NA
2R91	XUTs	5	9	0	2	-2.90671	0.225918
2R93	XUTs	26	20	13	27	-0.18991	0.869231
3F108	XUTs	54	66	16	23	-1.54682	0.00762354
3F11	XUTs	17	14	6	24	-0.13433	0.930654
3F111	XUTs	0	0	0	0	NA	NA
3F12	XUTs	52	62	31	46	-0.487193	0.452482
3F130	XUTs	0	0	0	0	NA	NA
3F132	XUTs	28	46	21	30	-0.443281	0.598785
3F31	XUTs	5	7	1	4	-1.31535	0.559278
3F33	XUTs	7	21	2	7	-1.65698	0.254714
3F39	XUTs	0	0	0	0	NA	NA
3F45	XUTs	0	2	0	0	-2.27638	NA
3F5	XUTs	1	0	0	0	-1.37743	NA
3F51	XUTs	25	35	15	44	-0.0552473	0.959773
3F58	XUTs	122	118	42	107	-0.703729	0.0843088
3F6	XUTs	0	0	0	0	NA	NA
3F61	XUTs	21	32	17	19	-0.423187	0.678725
3F65	XUTs	67	58	25	46	-0.782487	0.171444
3F70	XUTs	6	1	1	2	-1.23405	NA
3F71	XUTs	145	177	78	200	-0.226731	0.589278
3F74	XUTs	25	28	9	29	-0.525426	0.591648
3F78	XUTs	56	46	26	56	-0.307918	0.66723
3F82	XUTs	0	2	0	1	-0.954582	NA
3F84	XUTs	0	1	0	0	-1.3132	NA
3F92	XUTs	8	8	1	7	-1.11984	0.562523
3F94	XUTs	23	27	14	26	-0.281882	0.796978
3F99	XUTs	32	27	10	20	-0.95624	0.272549
3R100	XUTs	15	23	15	17	-0.113098	0.933708
3R106	XUTs	43	49	22	45	-0.434036	0.546915
3R119	XUTs	21	24	8	18	-0.782101	0.452375
3R124	XUTs	0	2	1	2	0.652276	NA
3R130	XUTs	0	1	0	1	0.00498896	NA
3R136	XUTs	18	13	7	30	0.151226	0.917066
3R144	XUTs	25	46	21	35	-0.27214	0.773009
3R147	XUTs	0	0	0	0	NA	NA
3R18	XUTs	1	0	2	0	1.48617	NA
3R28	XUTs	0	0	0	0	NA	NA
3R41	XUTs	5	5	1	1	-2.22324	NA
3R44	XUTs	41	53	21	32	-0.752685	0.270261
3R46	XUTs	41	45	17	56	-0.289659	0.724651
3R54	XUTs	8	12	0	5	-2.1556	0.239857
3R67	XUTs	42	43	17	36	-0.665985	0.355584
3R8	XUTs	1	0	0	0	-1.37743	NA
3R90	XUTs	0	1	0	2	0.729186	NA
4F115	XUTs	49	44	19	27	-0.940611	0.162865
4F117	XUTs	1	1	2	4	1.60994	NA
4F127	XUTs	91	90	30	74	-0.808499	0.0808945
4F132	XUTs	1	1	0	0	-2.33255	NA
4F137	XUTs	38	37	4	6	-2.85909	0.000708351
4F14	XUTs	9	10	5	12	-0.16333	0.931108
4F142	XUTs	4	11	4	11	-0.00662008	0.998115
4F148	XUTs	2	6	2	4	-0.367519	NA
4F160	XUTs	93	87	59	94	-0.17092	0.773009
4F161	XUTs	21	21	12	21	-0.301792	0.80195
4F162	XUTs	32	37	19	33	-0.357203	0.677009
4F175	XUTs	90	68	51	94	-0.0916067	0.890972
4F180	XUTs	1	0	0	0	-1.37743	NA
4F181	XUTs	2	4	2	8	0.663602	0.805527
4F19	XUTs	2	1	1	0	-1.30074	NA
4F193	XUTs	20	36	8	8	-1.67239	0.0752051
4F194	XUTs	2	1	2	7	1.50126	NA
4F204	XUTs	13	16	8	12	-0.460263	0.74324
4F206	XUTs	0	2	0	0	-2.27638	NA
4F207	XUTs	1	0	0	0	-1.37743	NA
4F231	XUTs	15	14	1	5	-2.3334	0.0986021
4F238	XUTs	5	4	2	5	-0.378162	0.885897
4F240	XUTs	11	6	4	6	-0.71034	0.696704
4F241	XUTs	3	1	1	1	-0.895793	NA
4F242	XUTs	14	24	24	41	0.839789	0.30746
4F248	XUTs	126	108	94	263	0.56624	0.12722
4F253	XUTs	77	114	25	25	-1.79595	0.000288706
4F255	XUTs	105	100	60	136	-0.0637061	0.915499
4F267	XUTs	105	138	43	92	-0.828129	0.036875
4F272	XUTs	28	34	7	12	-1.65816	0.0492101
4F273	XUTs	7	12	1	1	-3.15627	0.117354
4F278	XUTs	29	27	17	25	-0.340697	0.733841
4F28	XUTs	0	0	0	0	NA	NA
4F285	XUTs	3	4	7	2	0.723264	0.768443
4F288	XUTs	4	2	1	0	-2.36608	NA
4F293	XUTs	10	9	25	40	1.8415	0.0215943
4F297	XUTs	0	0	0	0	NA	NA
4F30	XUTs	30	37	32	49	0.351751	0.649612
4F300	XUTs	40	39	2	8	-3.01165	0.000366204
4F303	XUTs	20	34	9	27	-0.610462	0.535829
4F306	XUTs	19	42	25	40	0.175469	0.861757
4F309	XUTs	2	3	0	3	-0.949888	NA
4F316	XUTs	2	2	0	0	-3.33256	NA
4F32	XUTs	4	0	1	6	0.616708	NA
4F321	XUTs	0	0	0	0	NA	NA
4F328	XUTs	10	8	6	10	-0.120155	0.949702
4F331	XUTs	0	0	0	0	NA	NA
4F339	XUTs	11	6	5	18	0.350942	0.839346
4F34	XUTs	1	6	0	5	-0.69887	NA
4F340	XUTs	23	14	5	11	-1.21155	0.296165
4F341	XUTs	122	86	26	63	-1.23964	0.00584222
4F342	XUTs	12	11	6	15	-0.145137	0.932796
4F348	XUTs	10	13	6	13	-0.258481	0.874578
4F350	XUTs	2	0	0	0	-2.38673	NA
4F352	XUTs	2	2	2	3	0.396652	NA
4F354	XUTs	6	1	0	0	-4.17835	NA
4F361	XUTs	9	5	0	1	-3.78807	0.137646
4F376	XUTs	32	38	6	22	-1.37172	0.085772
4F377	XUTs	1	2	5	1	1.4129	NA
4F381	XUTs	3	1	0	1	-2.01679	NA
4F384	XUTs	10	6	9	9	0.309945	0.862168
4F395	XUTs	21	24	12	11	-0.814444	0.449652
4F416	XUTs	0	0	0	0	NA	NA
4F426	XUTs	9	6	0	0	-5.25018	0.0372672
4F43	XUTs	87	102	36	68	-0.82496	0.065218
4F435	XUTs	15	19	20	40	0.848883	0.320669
4F441	XUTs	4	16	3	22	0.183253	0.926597
4F446	XUTs	29	37	26	45	0.160762	0.860237
4F447	XUTs	43	40	12	34	-0.880711	0.224715
4F448	XUTs	0	3	3	7	1.7683	NA
4F449	XUTs	30	26	16	34	-0.152826	0.884185
4F467	XUTs	72	101	28	28	-1.48506	0.00387959
4F473	XUTs	3	5	0	0	-4.31907	NA
4F478	XUTs	35	31	12	17	-1.11389	0.170268
4F491	XUTs	52	42	15	71	-0.246825	0.781535
4F497	XUTs	6	9	11	24	1.23879	0.289584
4F50	XUTs	56	63	29	41	-0.681134	0.259721
4F500	XUTs	65	78	65	131	0.481991	0.297106
4F505	XUTs	12	5	1	3	-2.12879	0.270323
4F521	XUTs	0	0	0	0	NA	NA
4F522	XUTs	0	0	0	0	NA	NA
4F523	XUTs	0	0	0	0	NA	NA
4F524	XUTs	48	34	23	50	-0.165999	0.852745
4F526	XUTs	49	67	6	26	-1.91454	0.00232884
4F529	XUTs	188	256	176	396	0.374469	0.213376
4F531	XUTs	5	5	0	0	-4.65449	NA
4F532	XUTs	220	204	144	369	0.249739	0.477413
4F544	XUTs	9	7	18	26	1.54324	0.119918
4F546	XUTs	15	9	1	10	-1.28534	0.419588
4F562	XUTs	4	8	1	3	-1.59357	0.489689
4F582	XUTs	5	2	1	1	-1.71695	NA
4F592	XUTs	49	37	17	45	-0.499838	0.516053
4F597	XUTs	12	14	5	14	-0.476157	0.749835
4F605	XUTs	80	71	8	18	-2.53034	4.21287e-06
4F609	XUTs	5	5	8	2	0.365668	0.878474
4F617	XUTs	5	5	3	3	-0.602525	0.814021
4F622	XUTs	11	25	22	21	0.44216	0.695638
4F626	XUTs	1	2	0	0	-2.89951	NA
4F63	XUTs	0	0	0	0	NA	NA
4F639	XUTs	14	22	22	37	0.778978	0.370722
4F642	XUTs	94	116	63	123	-0.141595	0.79897
4F643	XUTs	4	4	1	2	-1.39169	NA
4F645	XUTs	56	54	16	49	-0.800001	0.202005
4F652	XUTs	3	3	1	1	-1.46966	NA
4F655	XUTs	10	11	0	3	-2.91981	0.117397
4F66	XUTs	3	1	0	1	-2.01679	NA
4F661	XUTs	18	13	2	6	-1.98404	0.129973
4F669	XUTs	23	13	5	9	-1.33809	0.257245
4F675	XUTs	89	50	16	24	-1.74611	0.00285538
4F685	XUTs	42	40	25	45	-0.187352	0.830258
4F689	XUTs	24	25	4	23	-0.971783	0.350341
4F692	XUTs	2	0	0	1	-1.05567	NA
4F697	XUTs	10	4	1	4	-1.56539	0.460579
4F700	XUTs	64	71	20	42	-1.10358	0.0373783
4F703	XUTs	1	0	0	0	-1.37743	NA
4F705	XUTs	10	5	5	8	-0.159699	0.939628
4F707	XUTs	12	13	5	5	-1.19465	0.41294
4F709	XUTs	12	10	1	3	-2.47876	0.138131
4F711	XUTs	33	23	2	6	-2.82872	0.00522386
4F87	XUTs	10	11	2	7	-1.26749	0.436631
4F90	XUTs	0	1	0	0	-1.3132	NA
4F92	XUTs	5	5	0	0	-4.65449	NA
4R1	XUTs	0	1	0	0	-1.3132	NA
4R100	XUTs	47	32	4	14	-2.18096	0.005628
4R104	XUTs	1	1	0	1	-1.00228	NA
4R120	XUTs	4	9	4	6	-0.288362	0.897628
4R125	XUTs	49	54	14	20	-1.52638	0.0152256
4R15	XUTs	5	5	0	3	-1.90974	NA
4R155	XUTs	10	25	7	16	-0.582115	0.649687
4R167	XUTs	18	15	11	19	-0.092579	0.947338
4R172	XUTs	5	8	1	6	-0.991031	0.648512
4R177	XUTs	57	56	3	6	-3.62873	1.70488e-06
4R182	XUTs	2	4	6	1	0.644704	0.823018
4R190	XUTs	34	39	6	26	-1.26266	0.111673
4R195	XUTs	2	3	0	1	-2.29846	NA
4R200	XUTs	0	2	1	0	-0.587823	NA
4R203	XUTs	33	34	11	29	-0.76094	0.356838
4R212	XUTs	114	88	30	70	-1.02141	0.0221377
4R218	XUTs	46	55	19	31	-0.954849	0.131468
4R231	XUTs	10	6	1	1	-2.9296	0.171515
4R234	XUTs	1	2	1	1	-0.435267	NA
4R237	XUTs	34	35	18	32	-0.420659	0.618397
4R246	XUTs	0	0	0	0	NA	NA
4R252	XUTs	50	62	15	48	-0.870417	0.161383
4R253	XUTs	0	3	5	4	1.82865	NA
4R255	XUTs	15	15	5	8	-1.15077	0.37326
4R263	XUTs	468	468	374	856	0.390762	0.0708723
4R265	XUTs	85	97	44	80	-0.510432	0.291495
4R27	XUTs	10	29	19	36	0.553067	0.582197
4R274	XUTs	92	119	34	47	-1.29331	0.00283246
4R283	XUTs	3	0	1	11	1.74287	NA
4R298	XUTs	13	19	8	8	-0.856937	0.508329
4R303	XUTs	226	217	116	170	-0.549658	0.0937518
4R309	XUTs	2	1	0	0	-2.93531	NA
4R313	XUTs	0	3	0	3	-0.219919	NA
4R327	XUTs	1	3	2	6	0.974543	NA
4R329	XUTs	77	84	97	138	0.639677	0.124335
4R333	XUTs	3	0	2	1	0.223879	NA
4R336	XUTs	9	4	3	9	-0.173506	0.939628
4R342	XUTs	11	12	2	8	-1.2623	0.4146
4R346	XUTs	20	16	9	16	-0.488371	0.685665
4R364	XUTs	240	267	17	39	-3.16531	9.34146e-23
4R365	XUTs	13	8	2	0	-3.1534	0.105363
4R370	XUTs	40	41	13	32	-0.854567	0.239857
4R372	XUTs	145	164	129	265	0.372906	0.265251
4R374	XUTs	1	4	0	1	-2.27874	NA
4R393	XUTs	105	118	127	241	0.76007	0.0149228
4R40	XUTs	1	0	0	0	-1.37743	NA
4R411	XUTs	19	29	10	30	-0.293356	0.799116
4R418	XUTs	1	0	0	0	-1.37743	NA
4R423	XUTs	23	29	8	20	-0.896335	0.345781
4R446	XUTs	44	43	36	58	0.174407	0.828214
4R45	XUTs	43	47	10	31	-1.16883	0.0867421
4R456	XUTs	35	45	27	34	-0.279489	0.74617
4R458	XUTs	5	5	1	2	-1.71382	NA
4R461	XUTs	12	9	4	6	-1.01091	0.526988
4R468	XUTs	0	0	0	0	NA	NA
4R483	XUTs	41	49	22	30	-0.700227	0.324663
4R486	XUTs	75	88	27	61	-0.880272	0.0689599
4R488	XUTs	2	2	0	0	-3.33256	NA
4R491	XUTs	63	88	32	105	-0.191735	0.778971
4R506	XUTs	141	148	45	77	-1.19515	0.000700278
4R514	XUTs	13	11	6	20	0.05423	0.973426
4R515	XUTs	48	47	19	37	-0.73503	0.271713
4R521	XUTs	0	1	1	0	0.419743	NA
4R527	XUTs	56	48	28	59	-0.245865	0.739695
4R529	XUTs	7	9	9	10	0.384613	0.826189
4R535	XUTs	4	6	1	1	-2.21255	NA
4R546	XUTs	5	0	3	2	0.181138	NA
4R548	XUTs	20	33	17	29	-0.141167	0.898801
4R549	XUTs	22	27	7	27	-0.59447	0.567311
4R55	XUTs	232	185	24	57	-2.36836	1.72264e-12
4R552	XUTs	19	10	10	3	-0.851909	0.574216
4R56	XUTs	12	14	1	0	-4.57117	0.028549
4R57	XUTs	93	109	72	123	0.0058793	0.993888
4R570	XUTs	3	3	0	2	-1.76181	NA
4R585	XUTs	4	7	4	5	-0.173164	0.94297
4R592	XUTs	4	3	2	3	-0.421918	NA
4R597	XUTs	0	0	0	0	NA	NA
4R599	XUTs	6	3	5	5	0.286591	0.906815
4R608	XUTs	18	15	9	27	0.0792076	0.955176
4R617	XUTs	7	10	3	3	-1.37318	0.456025
4R618	XUTs	0	2	0	3	0.348393	NA
4R619	XUTs	27	23	5	23	-0.929636	0.357645
4R68	XUTs	1	1	0	0	-2.33255	NA
4R71	XUTs	5	6	1	1	-2.35922	NA
4R81	XUTs	342	315	178	314	-0.370961	0.188359
4R9	XUTs	42	37	3	4	-3.44828	0.000131339
4R92	XUTs	38	30	38	87	0.872968	0.1259
4R94	XUTs	20	22	16	51	0.620095	0.480947
5F101	XUTs	2	3	2	5	0.480538	NA
5F112	XUTs	2	9	11	29	1.85761	0.114414
5F115	XUTs	0	12	1	1	-2.41803	NA
5F117	XUTs	0	2	0	2	-0.214762	NA
5F12	XUTs	12	15	3	9	-1.19471	0.39105
5F122	XUTs	18	19	4	4	-2.10312	0.0761695
5F125	XUTs	30	25	12	17	-0.849721	0.357538
5F126	XUTs	15	20	0	0	-6.45417	0.00142456
5F128	XUTs	229	212	106	216	-0.43493	0.171915
5F129	XUTs	22	34	27	33	0.225536	0.825116
5F136	XUTs	24	27	29	42	0.564466	0.479955
5F139	XUTs	204	222	141	264	-0.0341743	0.938468
5F140	XUTs	0	0	0	0	NA	NA
5F151	XUTs	4	15	5	12	-0.13939	0.94297
5F166	XUTs	3	5	3	6	0.205183	0.938945
5F171	XUTs	24	12	5	6	-1.63313	0.175595
5F174	XUTs	1	3	4	1	0.707358	NA
5F180	XUTs	10	18	8	17	-0.136192	0.93145
5F185	XUTs	1	5	0	4	-0.791838	NA
5F191	XUTs	35	54	16	57	-0.343734	0.672028
5F195	XUTs	24	17	11	16	-0.534288	0.636219
5F207	XUTs	47	45	5	3	-3.40802	4.60675e-05
5F21	XUTs	13	27	27	41	0.85845	0.293139
5F213	XUTs	30	33	40	66	0.81346	0.178655
5F217	XUTs	122	117	20	29	-2.2249	1.33064e-07
5F218	XUTs	17	27	6	7	-1.65119	0.118014
5F222	XUTs	5	6	1	1	-2.35922	NA
5F223	XUTs	2	0	0	1	-1.05567	NA
5F233	XUTs	0	0	0	1	1.42429	NA
5F238	XUTs	16	22	6	13	-0.980271	0.388105
5F239	XUTs	203	191	125	191	-0.243914	0.533939
5F24	XUTs	19	20	9	22	-0.337864	0.784241
5F248	XUTs	10	4	1	2	-2.22138	0.305923
5F255	XUTs	167	209	121	317	0.199229	0.60278
5F256	XUTs	0	0	0	0	NA	NA
5F33	XUTs	0	0	0	0	NA	NA
5F52	XUTs	18	8	10	13	-0.0936645	0.955176
5F55	XUTs	2	10	0	5	-1.44481	0.569234
5F62	XUTs	10	12	2	15	-0.513807	0.766987
5F67	XUTs	29	30	10	18	-1.03529	0.229491
5F68	XUTs	1	3	1	8	1.01509	NA
5F7	XUTs	47	50	19	51	-0.491595	0.485012
5F75	XUTs	26	18	14	25	-0.138922	0.91064
5F90	XUTs	0	0	0	0	NA	NA
5F98	XUTs	19	21	1	12	-1.75907	0.135698
5R11	XUTs	66	60	20	46	-0.932655	0.096454
5R111	XUTs	6	15	5	12	-0.290085	0.869376
5R115	XUTs	27	19	12	23	-0.371477	0.738762
5R12	XUTs	13	11	10	18	0.261498	0.856857
5R126	XUTs	34	55	24	39	-0.427391	0.574216
5R129	XUTs	120	172	129	236	0.372564	0.310539
5R135	XUTs	3	1	0	2	-1.23262	NA
5R139	XUTs	3	3	0	2	-1.76181	NA
5R142	XUTs	2	1	1	1	-0.466129	NA
5R144	XUTs	173	179	38	64	-1.7387	1.25901e-07
5R148	XUTs	5	9	1	17	0.150057	0.947338
5R151	XUTs	20	9	4	13	-0.836862	0.548567
5R165	XUTs	5	9	2	2	-1.67942	0.424945
5R166	XUTs	11	16	2	22	-0.349269	0.835961
5R168	XUTs	23	20	15	33	0.163493	0.884765
5R182	XUTs	16	9	7	11	-0.423098	0.787836
5R192	XUTs	41	38	3	6	-3.11356	0.000249977
5R194	XUTs	79	79	31	46	-0.965595	0.0522508
5R205	XUTs	4	1	0	0	-3.6866	NA
5R207	XUTs	0	0	0	0	NA	NA
5R211	XUTs	2	3	0	1	-2.29846	NA
5R216	XUTs	4	3	2	6	0.145582	NA
5R225	XUTs	0	8	4	0	-0.33336	NA
5R227	XUTs	0	0	0	0	NA	NA
5R230	XUTs	3	9	0	0	-4.89023	NA
5R232	XUTs	26	32	2	3	-3.48873	0.00127635
5R239	XUTs	1	0	0	0	-1.37743	NA
5R245	XUTs	1	0	0	0	-1.37743	NA
5R247	XUTs	3	1	2	11	1.54347	0.514766
5R26	XUTs	16	11	11	17	0.113874	0.939628
5R36	XUTs	16	8	6	19	-0.00748796	0.997419
5R40	XUTs	21	15	5	14	-0.954636	0.422858
5R48	XUTs	0	0	0	0	NA	NA
5R72	XUTs	7	4	0	1	-3.44417	NA
5R74	XUTs	8	15	8	15	0.0492237	0.978009
5R75	XUTs	22	21	14	25	-0.098559	0.936604
5R76	XUTs	45	37	12	39	-0.738997	0.332513
5R81	XUTs	17	24	2	6	-2.36554	0.0393936
5R90m	XUTs	54	33	18	38	-0.632584	0.405232
5R93	XUTs	178	151	77	149	-0.51605	0.158684
5R97	XUTs	23	35	2	11	-2.21991	0.0199601
6F104	XUTs	1	2	9	12	2.92244	0.088984
6F106	XUTs	12	8	6	7	-0.518168	0.76478
6F108	XUTs	4	3	0	1	-2.79446	NA
6F13	XUTs	0	0	0	0	NA	NA
6F15	XUTs	0	0	0	0	NA	NA
6F22	XUTs	142	128	220	501	1.41315	2.92376e-09
6F28	XUTs	0	0	0	0	NA	NA
6F34	XUTs	6	2	5	13	1.12746	0.533206
6F39	XUTs	7	8	0	6	-1.52224	0.476702
6F46	XUTs	17	18	14	34	0.447676	0.665703
6F52	XUTs	5	10	1	6	-1.18835	0.558028
6F62	XUTs	22	12	6	15	-0.71998	0.566659
6F83	XUTs	8	6	7	7	0.141226	0.944952
6F87	XUTs	3	8	6	12	0.754133	0.668759
6F9	XUTs	0	0	0	0	NA	NA
6R1	XUTs	0	0	0	0	NA	NA
6R108	XUTs	2	1	1	3	0.359595	NA
6R114	XUTs	0	0	0	0	NA	NA
6R115	XUTs	234	219	49	142	-1.28195	2.22003e-05
6R13	XUTs	0	0	0	0	NA	NA
6R17	XUTs	0	0	0	0	NA	NA
6R28	XUTs	6	9	4	5	-0.628593	0.753793
6R35	XUTs	0	0	0	0	NA	NA
6R39	XUTs	11	14	8	11	-0.303499	0.846391
6R50	XUTs	31	46	5	24	-1.48303	0.0601345
6R53	XUTs	11	9	5	6	-0.763138	0.644073
6R65	XUTs	32	18	19	39	0.220907	0.836567
6R66	XUTs	15	24	1	2	-3.66627	0.0102573
6R7	XUTs	0	1	1	1	1.17043	NA
6R81	XUTs	22	16	3	8	-1.80747	0.115547
6R82	XUTs	2	2	3	9	1.53798	0.503343
6R86	XUTs	1	0	0	0	-1.37743	NA
6R94	XUTs	4	1	2	2	-0.207355	NA
7F110	XUTs	1	0	0	0	-1.37743	NA
7F114	XUTs	2	1	0	0	-2.93531	NA
7F126	XUTs	6	10	6	16	0.445625	0.792962
7F130	XUTs	29	22	16	37	0.048676	0.965708
7F133	XUTs	79	79	13	33	-1.78671	0.000343204
7F144	XUTs	1	1	0	1	-1.00228	NA
7F158	XUTs	27	23	7	13	-1.29207	0.173041
7F16	XUTs	29	15	15	17	-0.349623	0.774521
7F163	XUTs	20	27	27	47	0.711416	0.352404
7F17	XUTs	2	2	0	3	-0.650425	NA
7F175	XUTs	3	8	1	1	-2.33796	NA
7F177	XUTs	5	2	1	0	-2.60645	NA
7F185	XUTs	9	4	3	12	0.1043	0.962355
7F206	XUTs	10	6	4	5	-0.743952	0.692396
7F209	XUTs	5	3	3	8	0.424598	0.860574
7F211	XUTs	77	60	9	17	-2.37493	3.80626e-05
7F213	XUTs	107	107	46	102	-0.525091	0.234073
7F236	XUTs	1	2	0	1	-1.56457	NA
7F261	XUTs	415	308	199	463	-0.14179	0.701756
7F267	XUTs	6	13	3	8	-0.789143	0.650018
7F271	XUTs	0	3	0	0	-2.86114	NA
7F276	XUTs	68	70	8	27	-2.01452	0.000295518
7F281	XUTs	54	46	13	29	-1.24754	0.0495374
7F283	XUTs	60	42	35	97	0.329409	0.618618
7F291	XUTs	2	0	2	2	1.11916	NA
7F296	XUTs	21	25	11	24	-0.380147	0.728328
7F31	XUTs	32	28	14	24	-0.61355	0.494997
7F311	XUTs	15	39	32	61	0.838301	0.248898
7F323	XUTs	24	30	13	25	-0.471418	0.624325
7F324	XUTs	105	113	79	151	0.111578	0.833988
7F333	XUTs	10	6	1	3	-2.03308	0.299815
7F339	XUTs	0	4	0	1	-1.94292	NA
7F347	XUTs	32	34	8	14	-1.54236	0.0558338
7F353	XUTs	18	20	4	4	-2.14116	0.0679001
7F358	XUTs	4	1	1	1	-1.22829	NA
7F36	XUTs	30	21	23	44	0.418318	0.630506
7F362	XUTs	0	1	0	0	-1.3132	NA
7F368	XUTs	23	12	2	6	-2.16632	0.0852425
7F375	XUTs	3	5	1	7	-0.131488	NA
7F380	XUTs	69	60	38	73	-0.189034	0.784088
7F384	XUTs	30	53	18	44	-0.416327	0.603413
7F391	XUTs	2	6	2	0	-1.59219	NA
7F393	XUTs	0	2	2	2	1.1974	NA
7F400	XUTs	4	6	2	5	-0.515083	0.839039
7F402	XUTs	7	9	10	0	-0.0742225	0.98934
7F406	XUTs	7	5	0	6	-1.22837	0.605837
7F409	XUTs	2	0	0	0	-2.38673	NA
7F413	XUTs	0	0	0	0	NA	NA
7F414	XUTs	21	23	13	23	-0.242899	0.837086
7F426	XUTs	36	40	31	78	0.506438	0.442222
7F437	XUTs	248	251	150	351	0.000904407	0.998518
7F439	XUTs	118	127	76	178	0.0499074	0.929605
7F44	XUTs	12	25	12	16	-0.290498	0.8302
7F447	XUTs	69	76	24	41	-1.10772	0.0299057
7F455	XUTs	34	20	5	6	-2.22494	0.0234914
7F460	XUTs	60	57	5	12	-2.77812	1.93457e-05
7F466	XUTs	1	0	0	0	-1.37743	NA
7F469	XUTs	60	87	103	169	0.960228	0.0100098
7F470	XUTs	13	24	9	32	0.0922768	0.945134
7F471	XUTs	5	4	2	1	-1.3802	NA
7F475	XUTs	68	63	43	80	-0.0557996	0.939327
7F478	XUTs	0	1	0	4	1.70711	NA
7F479	XUTs	1	1	5	3	2.2578	NA
7F48	XUTs	13	7	0	1	-4.29698	0.0590134
7F480	XUTs	19	19	7	10	-1.08703	0.335441
7F59	XUTs	4	11	7	12	0.414011	0.821802
7F64	XUTs	3	3	0	2	-1.76181	NA
7F65	XUTs	2	3	2	2	-0.172908	NA
7F7	XUTs	2	2	0	0	-3.33256	NA
7F71	XUTs	10	5	0	1	-3.88899	0.119554
7F76	XUTs	32	49	17	31	-0.705921	0.351189
7F91	XUTs	0	0	0	0	NA	NA
7F95	XUTs	5	4	8	13	1.28225	0.408883
7R104	XUTs	0	0	0	0	NA	NA
7R105	XUTs	34	27	11	33	-0.515734	0.573345
7R114	XUTs	7	12	14	16	0.800901	0.526988
7R116	XUTs	1	1	1	3	0.956156	NA
7R12	XUTs	4	9	3	2	-1.17445	0.587209
7R123	XUTs	11	17	5	12	-0.713189	0.602501
7R124	XUTs	28	34	34	47	0.48359	0.522019
7R129	XUTs	20	31	8	24	-0.698698	0.486191
7R131	XUTs	0	1	0	0	-1.3132	NA
7R133	XUTs	22	69	15	48	-0.55977	0.522735
7R135	XUTs	24	20	2	5	-2.65447	0.0187509
7R144	XUTs	109	118	77	141	-0.0162968	0.978895
7R159	XUTs	12	5	1	2	-2.50101	0.207044
7R165	XUTs	9	7	4	17	0.292626	0.871822
7R168	XUTs	3	12	1	11	-0.475564	0.836755
7R172	XUTs	34	31	16	29	-0.492778	0.569234
7R173	XUTs	81	83	50	69	-0.37184	0.50862
7R174	XUTs	20	11	2	2	-2.88208	0.0469791
7R181	XUTs	55	54	10	16	-2.01818	0.00118823
7R184	XUTs	0	0	0	0	NA	NA
7R187	XUTs	15	15	4	6	-1.52327	0.238684
7R19	XUTs	18	21	20	27	0.368871	0.725507
7R2	XUTs	0	0	1	0	1.92724	NA
7R20	XUTs	43	64	28	67	-0.168488	0.831282
7R21	XUTs	3	5	0	2	-2.14364	NA
7R213	XUTs	20	27	17	28	0.00206374	0.998856
7R228	XUTs	29	26	9	14	-1.20042	0.180099
7R231	XUTs	1	0	0	1	-0.0498421	NA
7R238	XUTs	42	38	19	22	-0.853803	0.259141
7R243	XUTs	269	268	283	662	0.80802	0.000176768
7R245	XUTs	75	96	54	92	-0.169432	0.77957
7R25	XUTs	4	4	0	3	-1.60463	NA
7R255	XUTs	3	6	3	7	0.165264	0.948638
7R261	XUTs	8	12	1	10	-1.00644	0.565552
7R262	XUTs	69	71	15	23	-1.82291	0.000645847
7R264	XUTs	76	56	43	95	0.0633251	0.932796
7R269	XUTs	10	20	9	18	-0.112262	0.940301
7R275	XUTs	3	3	2	2	-0.449181	NA
7R276	XUTs	1	0	0	1	-0.0498421	NA
7R295	XUTs	21	26	5	5	-2.12174	0.0407088
7R298	XUTs	2	2	3	7	1.31888	NA
7R303	XUTs	1	0	0	0	-1.37743	NA
7R305	XUTs	32	58	38	70	0.31624	0.653716
7R308	XUTs	4	9	2	0	-2.35946	0.334466
7R315	XUTs	109	89	24	65	-1.18038	0.00862139
7R319	XUTs	16	11	2	7	-1.63716	0.245656
7R322	XUTs	44	28	18	48	-0.160735	0.866426
7R326	XUTs	9	7	4	4	-0.87505	0.640184
7R328	XUTs	1	3	2	5	0.813269	NA
7R336	XUTs	62	66	13	16	-2.05659	0.000380286
7R340	XUTs	61	74	41	128	0.274583	0.644023
7R348	XUTs	4	4	4	13	1.02886	0.577028
7R35	XUTs	0	0	0	0	NA	NA
7R360	XUTs	7	8	4	8	-0.294838	0.884185
7R365	XUTs	150	190	47	50	-1.67702	7.36857e-06
7R374	XUTs	72	80	52	83	-0.104068	0.874578
7R383	XUTs	0	1	0	1	0.00498896	NA
7R384	XUTs	1	1	0	0	-2.33255	NA
7R404	XUTs	52	55	15	51	-0.751271	0.248222
7R411	XUTs	6	15	8	6	-0.37004	0.838837
7R418	XUTs	93	123	74	144	0.0492484	0.93329
7R42	XUTs	20	12	4	4	-1.90086	0.141137
7R424	XUTs	0	0	0	0	NA	NA
7R426	XUTs	12	15	1	9	-1.55451	0.286468
7R43	XUTs	5	9	2	1	-2.02211	0.351189
7R433	XUTs	69	69	40	78	-0.19742	0.760597
7R435	XUTs	2	2	5	4	1.3692	NA
7R45	XUTs	9	7	0	0	-5.33927	0.0300878
7R459	XUTs	51	59	21	54	-0.564621	0.378424
7R460	XUTs	1	5	0	0	-3.88093	NA
7R469	XUTs	27	20	6	13	-1.3017	0.188166
7R483	XUTs	7	23	10	16	-0.116363	0.940864
7R5	XUTs	19	16	2	8	-1.86387	0.125616
7R51	XUTs	11	7	1	3	-2.19963	0.234073
7R63	XUTs	99	79	17	33	-1.81056	0.000148969
7R7	XUTs	2	0	0	1	-1.05567	NA
7R77	XUTs	32	33	15	26	-0.617356	0.469335
7R88	XUTs	5	2	1	3	-0.860976	NA
7R9	XUTs	0	0	0	0	NA	NA
7R93	XUTs	22	23	14	20	-0.322572	0.778475
7R97	XUTs	0	0	0	0	NA	NA
8F102	XUTs	1	3	4	10	1.80783	0.392304
8F104	XUTs	13	26	20	36	0.580678	0.537942
8F113	XUTs	2	1	0	1	-1.5978	NA
8F117	XUTs	5	6	5	4	-0.103942	0.965708
8F123	XUTs	1	0	1	0	0.366115	NA
8F13	XUTs	0	2	0	3	0.348393	NA
8F130	XUTs	22	23	25	47	0.714866	0.355584
8F131	XUTs	273	259	69	142	-1.31643	6.87719e-07
8F134	XUTs	3	8	2	5	-0.640055	0.796868
8F135	XUTs	14	27	16	17	-0.159815	0.903305
8F144	XUTs	0	0	0	0	NA	NA
8F158	XUTs	36	53	11	31	-1.09918	0.115059
8F159	XUTs	17	18	1	10	-1.79446	0.154652
8F162	XUTs	0	0	0	0	NA	NA
8F165	XUTs	0	0	2	4	4.05303	NA
8F168	XUTs	37	33	7	6	-2.31023	0.0063567
8F18	XUTs	5	7	0	1	-3.54481	NA
8F190	XUTs	0	0	0	0	NA	NA
8F193	XUTs	37	30	15	52	-0.0705297	0.945134
8F2	XUTs	91	80	55	108	-0.0447017	0.944952
8F204	XUTs	48	44	67	109	0.998901	0.0282028
8F212	XUTs	5	3	2	9	0.347611	0.890629
8F22	XUTs	4	13	1	3	-2.08119	0.292796
8F226	XUTs	4	8	5	2	-0.481293	0.841081
8F229	XUTs	16	16	10	11	-0.483947	0.71397
8F237	XUTs	57	73	40	38	-0.570568	0.383111
8F239	XUTs	3	11	1	1	-2.68554	0.252209
8F245	XUTs	0	0	0	0	NA	NA
8F246	XUTs	6	6	2	6	-0.620084	0.786767
8F32	XUTs	1	0	0	0	-1.37743	NA
8F36	XUTs	2	2	1	1	-0.873255	NA
8F44	XUTs	51	53	19	49	-0.62766	0.337947
8F48	XUTs	2	8	1	8	-0.280732	0.920625
8F65	XUTs	10	19	8	20	-0.0491312	0.974191
8F67	XUTs	35	28	14	22	-0.750441	0.383768
8F72	XUTs	44	54	34	58	-0.0342481	0.966251
8F76	XUTs	3	1	0	0	-3.35927	NA
8F77	XUTs	97	99	16	25	-2.20436	1.69521e-06
8F87	XUTs	39	32	16	27	-0.677108	0.404164
8F92	XUTs	69	70	55	92	0.137872	0.832347
8R10	XUTs	89	109	48	97	-0.422221	0.376084
8R111	XUTs	0	0	0	0	NA	NA
8R113	XUTs	14	36	17	22	-0.233216	0.845916
8R115	XUTs	48	59	25	54	-0.421313	0.528256
8R117	XUTs	22	39	30	43	0.358928	0.671708
8R118	XUTs	9	12	6	11	-0.259918	0.879581
8R125	XUTs	10	9	18	36	1.53003	0.0861817
8R129	XUTs	0	0	0	0	NA	NA
8R130	XUTs	11	8	0	4	-2.40503	0.203811
8R135	XUTs	6	8	1	6	-1.09923	0.593617
8R137	XUTs	29	28	4	13	-1.77954	0.0483852
8R142	XUTs	5	2	1	4	-0.579098	NA
8R157	XUTs	103	115	20	50	-1.64213	7.86652e-05
8R16	XUTs	3	2	0	0	-3.6652	NA
8R165	XUTs	7	10	0	4	-2.2363	0.267417
8R171m	XUTs	15	12	12	15	0.103	0.945134
8R172	XUTs	33	28	14	11	-1.11869	0.215399
8R174	XUTs	46	89	39	47	-0.515736	0.440116
8R189	XUTs	119	127	50	71	-0.940976	0.0186541
8R190	XUTs	74	96	91	163	0.630842	0.105532
8R193	XUTs	81	86	44	91	-0.287042	0.596257
8R199	XUTs	15	28	2	12	-1.70012	0.129645
8R214	XUTs	11	12	3	3	-1.82595	0.238395
8R216	XUTs	0	1	0	0	-1.3132	NA
8R217	XUTs	12	16	3	2	-2.33402	0.10664
8R22	XUTs	6	6	1	1	-2.49251	NA
8R221	XUTs	10	10	2	3	-1.94289	0.248937
8R223	XUTs	33	46	24	78	0.317036	0.675299
8R227	XUTs	26	12	0	8	-2.43548	0.0671827
8R234	XUTs	2	6	0	3	-1.58455	NA
8R241	XUTs	0	0	2	5	4.23098	NA
8R242	XUTs	5	4	11	11	1.44541	0.327308
8R246	XUTs	8	5	4	0	-1.29219	0.58288
8R247	XUTs	49	74	27	35	-0.881943	0.141827
8R253	XUTs	4	4	3	2	-0.477381	NA
8R26	XUTs	89	74	33	54	-0.853798	0.0862712
8R47	XUTs	36	31	16	44	-0.190591	0.84404
8R64	XUTs	32	52	9	25	-1.3145	0.069936
8R68	XUTs	6	14	6	9	-0.323419	0.857277
8R76	XUTs	10	9	1	3	-2.26771	0.205013
8R87	XUTs	5	7	6	11	0.54947	0.76478
8R98	XUTs	47	43	25	72	0.068463	0.937319
9F10	XUTs	63	99	43	66	-0.489563	0.378424
9F104	XUTs	3	7	11	22	1.76134	0.151768
9F108	XUTs	0	1	0	0	-1.3132	NA
9F111	XUTs	90	104	18	37	-1.79514	5.17662e-05
9F113	XUTs	41	62	40	47	-0.109987	0.897239
9F117	XUTs	1	3	0	0	-3.30537	NA
9F120	XUTs	27	30	26	43	0.33657	0.691012
9F122	XUTs	7	2	7	10	0.98411	0.583216
9F129	XUTs	10	12	3	6	-1.26158	0.419959
9F13	XUTs	9	20	7	5	-1.06837	0.453173
9F136	XUTs	28	42	23	52	0.111799	0.905655
9F138	XUTs	38	49	14	31	-0.936333	0.176192
9F139	XUTs	141	173	67	99	-0.837973	0.0195868
9F143	XUTs	14	17	5	2	-1.91904	0.158726
9F152	XUTs	6	7	3	2	-1.19283	0.5738
9F159	XUTs	3	11	1	8	-0.756172	0.737746
9F171	XUTs	5	11	2	8	-0.732591	0.707451
9F176	XUTs	20	33	15	31	-0.174202	0.874404
9F185	XUTs	0	0	0	0	NA	NA
9F189	XUTs	55	123	87	119	0.334794	0.56759
9F2	XUTs	513	543	123	272	-1.41003	1.45846e-12
9F202	XUTs	5	10	3	8	-0.452015	0.830258
9F207	XUTs	0	0	0	1	1.42429	NA
9F210	XUTs	0	3	0	0	-2.86114	NA
9F213	XUTs	117	104	84	128	0.0129529	0.983508
9F220	XUTs	11	4	3	2	-1.42809	0.483284
9F25	XUTs	4	5	0	4	-1.37001	NA
9F29	XUTs	1	0	0	3	1.25742	NA
9F31	XUTs	0	0	1	1	2.61267	NA
9F32	XUTs	8	17	14	23	0.642232	0.581687
9F38	XUTs	98	83	18	66	-1.17654	0.0170454
9F4	XUTs	1236	1380	532	1061	-0.687523	8.23171e-06
9F43	XUTs	0	1	0	1	0.00498896	NA
9F55	XUTs	12	11	1	9	-1.33835	0.40247
9F57	XUTs	8	12	9	10	0.0635456	0.970705
9F63	XUTs	0	0	0	0	NA	NA
9F71	XUTs	6	13	0	9	-1.28675	0.509539
9F75	XUTs	0	0	1	1	2.61267	NA
9F9	XUTs	24	25	8	19	-0.860437	0.378424
9F90	XUTs	0	0	0	0	NA	NA
9F91	XUTs	3	0	0	2	-0.876402	NA
9F93	XUTs	5	8	1	2	-2.08083	0.352413
9F96	XUTs	37	45	12	30	-0.969276	0.176168
9F98	XUTs	16	17	7	15	-0.570364	0.648689
9R104	XUTs	0	0	0	0	NA	NA
9R117	XUTs	12	11	2	9	-1.14449	0.461873
9R118	XUTs	2	1	0	0	-2.93531	NA
9R124	XUTs	6	7	3	7	-0.375058	0.863814
9R141	XUTs	2	2	1	1	-0.873255	NA
9R145	XUTs	13	15	8	16	-0.195023	0.895304
9R14m	XUTs	12	10	6	10	-0.410085	0.807828
9R14m2	XUTs	22	14	1	10	-1.84937	0.140818
9R150	XUTs	0	0	1	0	1.92724	NA
9R167	XUTs	26	23	4	5	-2.3742	0.0208236
9R170	XUTs	3	5	1	9	0.160172	0.955176
9R175	XUTs	30	19	11	17	-0.752912	0.460232
9R183	XUTs	7	6	4	4	-0.568134	0.797499
9R194	XUTs	13	13	5	12	-0.616794	0.66599
9R2	XUTs	6	5	2	1	-1.68049	NA
9R22	XUTs	6	4	0	0	-4.66521	NA
9R35	XUTs	28	39	23	37	-0.0893503	0.931108
9R38	XUTs	6	11	1	7	-1.19199	0.529519
9R40	XUTs	1	1	0	0	-2.33255	NA
9R45	XUTs	4	2	0	2	-1.77967	NA
9R49	XUTs	5	2	2	1	-1.01721	NA
9R51	XUTs	32	40	21	31	-0.388768	0.646021
9R53	XUTs	93	97	34	104	-0.505459	0.311932
9R55	XUTs	38	58	26	45	-0.376422	0.606516
9R56	XUTs	36	38	2	5	-3.39363	0.000243088
9R63	XUTs	145	162	112	198	0.0640977	0.89311
9R77	XUTs	20	15	7	23	-0.282453	0.835487
9R84	XUTs	29	36	8	21	-1.17313	0.151768
CUT001	CUTs	23	25	3	4	-2.71422	0.0110853
CUT002	CUTs	30	35	12	19	-1.00557	0.208323
CUT003	CUTs	10	14	16	18	0.642487	0.572568
CUT004	CUTs	61	85	81	128	0.595163	0.170974
CUT005	CUTs	22	23	5	3	-2.33027	0.0321714
CUT006	CUTs	6	13	1	6	-1.52115	0.382725
CUT007	CUTs	25	33	3	4	-2.98582	0.00290846
CUT008	CUTs	19	28	1	4	-3.24744	0.00612616
CUT009	CUTs	23	12	14	25	0.186456	0.875869
CUT010	CUTs	18	30	11	20	-0.57978	0.559095
CUT011	CUTs	35	30	6	6	-2.3392	0.00732097
CUT012	CUTs	5	10	1	8	-0.862769	0.661038
CUT013	CUTs	11	18	0	1	-4.79894	0.0179317
CUT014	CUTs	98	92	54	125	-0.0892645	0.8727
CUT015	CUTs	22	26	6	8	-1.69703	0.0792668
CUT016	CUTs	53	45	2	7	-3.46349	1.6389e-05
CUT017	CUTs	97	108	34	112	-0.544984	0.247598
CUT018	CUTs	7	14	3	4	-1.48927	0.348427
CUT019	CUTs	57	57	29	77	-0.128809	0.855153
CUT020	CUTs	15	12	0	2	-3.82984	0.0339221
CUT021	CUTs	45	38	2	18	-2.17384	0.0062767
CUT022	CUTs	14	6	0	0	-5.676	0.0136707
CUT023	CUTs	37	48	2	11	-2.76073	0.000550452
CUT024	CUTs	13	18	3	4	-2.0681	0.108148
CUT025	CUTs	110	93	136	233	0.914002	0.00427266
CUT026	CUTs	9	13	3	17	-0.253522	0.877038
CUT027	CUTs	51	43	12	17	-1.63022	0.014086
CUT028	CUTs	22	21	6	13	-1.16758	0.247656
CUT029	CUTs	24	40	3	3	-3.32416	0.00104093
CUT030	CUTs	99	112	28	47	-1.4406	0.000568923
CUT031	CUTs	13	8	3	11	-0.660493	0.676111
CUT032	CUTs	57	94	67	118	0.353011	0.490327
CUT033	CUTs	5	5	3	1	-1.0467	NA
CUT034	CUTs	4	5	0	2	-2.31286	NA
CUT035	CUTs	32	26	17	40	-0.0334991	0.974734
CUT036	CUTs	3	5	0	1	-2.96526	NA
CUT037	CUTs	46	23	8	4	-2.34114	0.0114699
CUT038	CUTs	25	21	4	14	-1.40615	0.15714
CUT039	CUTs	25	14	8	7	-1.24131	0.27158
CUT040	CUTs	28	13	6	17	-0.881557	0.430049
CUT041	CUTs	63	74	10	10	-2.67542	8.90121e-06
CUT042	CUTs	26	17	0	3	-3.92175	0.00575198
CUT043	CUTs	45	35	12	25	-1.10137	0.121903
CUT044	CUTs	72	52	15	20	-1.75306	0.00308233
CUT045	CUTs	20	12	0	5	-2.82372	0.0496077
CUT046	CUTs	95	95	51	115	-0.191694	0.715209
CUT047	CUTs	30	27	26	48	0.412829	0.594047
CUT048	CUTs	30	39	10	39	-0.564447	0.503076
CUT049	CUTs	20	33	6	18	-1.16402	0.209592
CUT050	CUTs	51	66	6	6	-3.19688	5.30798e-06
CUT051	CUTs	5	18	2	1	-2.74508	0.116804
CUT052	CUTs	13	17	10	17	-0.0944196	0.947128
CUT053	CUTs	5	5	1	2	-1.71415	NA
CUT054	CUTs	29	23	0	6	-3.23062	0.00490326
CUT055	CUTs	8	2	4	10	0.444053	0.83008
CUT056	CUTs	20	21	2	13	-1.55628	0.157078
CUT057	CUTs	76	100	6	7	-3.69202	1.6125e-09
CUT058	CUTs	50	55	2	14	-2.78573	0.000106762
CUT059	CUTs	17	26	7	15	-0.943639	0.358957
CUT060	CUTs	4	3	0	0	-4.14778	NA
CUT061	CUTs	14	16	17	29	0.672825	0.487875
CUT062	CUTs	21	17	6	12	-1.05981	0.3317
CUT063	CUTs	9	18	19	38	1.11566	0.198835
CUT064	CUTs	122	106	90	242	0.506955	0.173466
CUT065	CUTs	75	91	17	50	-1.33467	0.00585568
CUT066	CUTs	13	14	2	1	-3.02734	0.053795
CUT067	CUTs	42	22	10	32	-0.67381	0.45159
CUT068	CUTs	45	50	0	7	-3.83726	1.79386e-05
CUT069	CUTs	17	9	6	0	-1.56258	0.675203
CUT070	CUTs	185	242	143	342	0.180166	0.608933
CUT071	CUTs	27	29	1	10	-2.4484	0.0132516
CUT072	CUTs	11	16	9	16	-0.0587221	0.968094
CUT073	CUTs	1	3	0	3	-0.632381	NA
CUT074	CUTs	21	29	13	28	-0.267413	0.797306
CUT075	CUTs	12	63	6	6	-2.48674	0.0118885
CUT076	CUTs	28	30	11	16	-1.02961	0.227422
CUT077	CUTs	54	53	40	62	0.000352708	0.999605
CUT078	CUTs	71	38	10	15	-2.07876	0.00204858
CUT079	CUTs	11	19	1	5	-2.36852	0.0868704
CUT080	CUTs	14	5	2	3	-1.89017	0.275138
CUT081	CUTs	36	34	6	12	-1.93807	0.0141583
CUT082	CUTs	14	8	0	0	-5.80673	0.00937233
CUT083	CUTs	0	0	0	0	NA	NA
CUT084	CUTs	0	0	0	0	NA	NA
CUT085	CUTs	35	51	4	18	-2.02239	0.00654898
CUT086	CUTs	75	116	50	44	-0.833013	0.121808
CUT087	CUTs	40	28	24	45	0.0483909	0.961166
CUT088	CUTs	27	35	12	8	-1.43668	0.103729
CUT089	CUTs	0	5	2	12	1.36945	0.557804
CUT090	CUTs	547	504	305	657	-0.120803	0.660782
CUT091	CUTs	24	31	17	42	0.0950036	0.926377
CUT092	CUTs	86	84	10	30	-2.11152	2.22616e-05
CUT093	CUTs	114	109	90	143	0.12991	0.796049
CUT094	CUTs	138	108	6	25	-3.03637	2.36832e-10
CUT095	CUTs	8	11	2	4	-1.63229	0.328434
CUT096	CUTs	7	12	10	8	0.12416	0.943677
CUT097	CUTs	11	16	2	7	-1.61938	0.237791
CUT098	CUTs	32	36	6	14	-1.75876	0.0264808
CUT099	CUTs	15	14	8	14	-0.354493	0.794708
CUT100	CUTs	19	26	8	37	-0.0986293	0.935859
CUT101	CUTs	15	15	1	4	-2.6213	0.0600191
CUT102	CUTs	31	12	7	11	-1.21751	0.263162
CUT103	CUTs	20	16	3	7	-1.84918	0.109285
CUT104	CUTs	1	4	0	1	-2.28007	NA
CUT105	CUTs	73	85	90	224	0.976807	0.00464141
CUT106	CUTs	45	39	16	32	-0.787337	0.259167
CUT107	CUTs	4	3	6	10	1.24617	0.47819
CUT108	CUTs	21	26	3	13	-1.61661	0.105446
CUT109	CUTs	55	53	7	20	-2.01901	0.00135456
CUT110	CUTs	24	30	1	0	-5.65105	0.00152263
CUT111	CUTs	23	34	4	12	-1.84799	0.0398864
CUT112	CUTs	9	9	2	9	-0.796091	0.641257
CUT113	CUTs	76	72	43	73	-0.300453	0.593681
CUT114	CUTs	50	59	8	18	-2.05455	0.000996247
CUT115	CUTs	6	5	0	1	-3.43513	NA
CUT116	CUTs	14	11	2	5	-1.84591	0.198954
CUT117	CUTs	12	19	10	26	0.205095	0.870433
CUT118	CUTs	45	46	20	22	-0.994738	0.14496
CUT119	CUTs	45	36	6	10	-2.30254	0.00247864
CUT120	CUTs	12	12	0	3	-3.10692	0.0717503
CUT121	CUTs	22	21	3	11	-1.66849	0.109013
CUT122	CUTs	0	3	3	6	1.64583	NA
CUT123	CUTs	15	29	3	19	-1.10687	0.315268
CUT124	CUTs	12	21	2	6	-2.05242	0.103229
CUT125	CUTs	20	14	14	18	0.00759778	0.996563
CUT126	CUTs	21	11	4	3	-2.06197	0.112688
CUT127	CUTs	45	32	22	49	-0.119613	0.891004
CUT128	CUTs	5	13	5	15	0.128411	0.943536
CUT129	CUTs	63	60	8	18	-2.23381	0.000172841
CUT130	CUTs	13	20	1	0	-4.91728	0.0118885
CUT131	CUTs	45	75	49	54	-0.0683746	0.93182
CUT132	CUTs	49	33	5	10	-2.43824	0.00172619
CUT133	CUTs	31	23	7	13	-1.40686	0.115876
CUT134	CUTs	31	32	5	7	-2.32965	0.00765429
CUT135	CUTs	79	79	13	33	-1.78729	0.000348981
CUT136	CUTs	29	18	10	21	-0.595856	0.555176
CUT137	CUTs	22	13	27	34	0.905923	0.277075
CUT138	CUTs	2	3	2	9	1.03776	NA
CUT139	CUTs	14	24	9	18	-0.457005	0.693067
CUT140	CUTs	9	6	2	2	-1.80559	0.350683
CUT141	CUTs	9	7	2	7	-0.889801	0.62317
CUT142	CUTs	14	18	4	7	-1.49352	0.218605
CUT143	CUTs	74	60	9	17	-2.34209	5.24853e-05
CUT144	CUTs	62	100	23	55	-1.04691	0.0363047
CUT145	CUTs	32	30	3	4	-3.09237	0.00151519
CUT146	CUTs	33	30	17	5	-1.19321	0.233747
CUT147	CUTs	49	42	22	44	-0.443383	0.527707
CUT148	CUTs	407	304	199	463	-0.117609	0.748941
CUT149	CUTs	79	75	13	39	-1.59759	0.00172111
CUT150	CUTs	136	137	60	163	-0.32083	0.447686
CUT151	CUTs	55	47	17	32	-1.029	0.0948648
CUT152	CUTs	9	6	0	1	-3.88214	NA
CUT153	CUTs	38	24	7	9	-1.88441	0.0300903
CUT154	CUTs	14	13	3	17	-0.553716	0.698695
CUT155	CUTs	9	14	2	12	-0.823779	0.591198
CUT156	CUTs	59	61	14	27	-1.52054	0.00726651
CUT157	CUTs	8	8	1	0	-3.84542	0.101968
CUT158	CUTs	48	72	30	52	-0.491621	0.424659
CUT159	CUTs	17	21	4	12	-1.27338	0.247152
CUT160	CUTs	66	78	15	39	-1.42352	0.00583844
CUT161	CUTs	50	52	39	63	0.0632082	0.93398
CUT162	CUTs	0	1	0	0	-1.31393	NA
CUT163	CUTs	91	85	10	23	-2.40926	1.40915e-06
CUT164	CUTs	29	47	3	11	-2.46451	0.0028252
CUT165	CUTs	9	12	1	7	-1.49611	0.353588
CUT166	CUTs	14	23	5	16	-0.849861	0.458704
CUT167	CUTs	39	27	6	15	-1.66701	0.0415525
CUT168	CUTs	12	12	2	2	-2.49039	0.109013
CUT169	CUTs	11	19	8	21	-0.0579192	0.967705
CUT170	CUTs	21	12	4	7	-1.55736	0.200599
CUT171	CUTs	20	14	7	7	-1.15967	0.330675
CUT172	CUTs	5	7	0	6	-1.21412	NA
CUT173	CUTs	39	34	10	27	-1.00394	0.182935
CUT174	CUTs	7	8	4	3	-0.921702	0.624285
CUT175	CUTs	110	108	20	34	-1.9702	3.67866e-06
CUT176	CUTs	4	5	0	1	-3.13956	NA
CUT177	CUTs	58	34	3	4	-3.67885	3.06619e-05
CUT178	CUTs	12	11	5	18	-0.0701258	0.966178
CUT179	CUTs	39	24	5	5	-2.56877	0.00567494
CUT180	CUTs	3	1	7	7	1.95427	0.309905
CUT181	CUTs	25	21	32	60	1.0331	0.107053
CUT182	CUTs	44	23	8	24	-1.11849	0.183132
CUT183	CUTs	14	16	10	10	-0.440598	0.742486
CUT184	CUTs	5	2	3	3	-0.0975189	NA
CUT185	CUTs	10	5	2	7	-0.808773	0.669929
CUT186	CUTs	7	12	3	13	-0.325793	0.852169
CUT187	CUTs	2	2	1	3	-0.0394135	NA
CUT188	CUTs	123	112	7	42	-2.35872	6.83949e-07
CUT189	CUTs	33	40	21	35	-0.323439	0.692405
CUT190	CUTs	11	5	23	34	1.90585	0.0305609
CUT191	CUTs	76	97	17	34	-1.73312	0.000256267
CUT192	CUTs	0	1	0	0	-1.31393	NA
CUT193	CUTs	53	61	48	85	0.271732	0.642591
CUT194	CUTs	19	9	1	3	-2.8384	0.0603435
CUT195	CUTs	8	7	2	6	-0.943169	0.614276
CUT196	CUTs	21	25	0	4	-3.60243	0.00521874
CUT197	CUTs	96	116	20	31	-1.99504	4.75198e-06
CUT198	CUTs	29	21	5	4	-2.35364	0.0213917
CUT199	CUTs	24	23	11	27	-0.316934	0.762556
CUT200	CUTs	82	77	8	29	-2.14824	4.64342e-05
CUT201	CUTs	0	0	0	0	NA	NA
CUT202	CUTs	6	8	7	14	0.615018	0.689211
CUT203	CUTs	2	2	2	1	-0.166318	NA
CUT204	CUTs	17	23	3	11	-1.55754	0.151858
CUT205	CUTs	88	106	47	93	-0.440667	0.340872
CUT206	CUTs	33	43	39	62	0.483003	0.45404
CUT207	CUTs	13	15	1	14	-1.07557	0.451734
CUT208	CUTs	13	13	15	19	0.495691	0.668168
CUT209	CUTs	19	19	0	2	-4.29726	0.00845543
CUT210	CUTs	6	2	2	3	-0.631749	NA
CUT211	CUTs	44	45	11	23	-1.37076	0.0386367
CUT212	CUTs	7	6	11	12	0.960088	0.49169
CUT213	CUTs	25	19	1	4	-3.17084	0.00871246
CUT214	CUTs	36	41	18	31	-0.601212	0.423582
CUT215	CUTs	4	5	2	2	-1.03831	NA
CUT216	CUTs	54	53	9	17	-2.01195	0.00131906
CUT217	CUTs	18	15	5	21	-0.434187	0.737276
CUT218	CUTs	17	13	8	15	-0.35519	0.791777
CUT219	CUTs	27	21	9	26	-0.495261	0.622791
CUT220	CUTs	23	19	5	17	-0.988171	0.347228
CUT221	CUTs	149	157	106	192	0.00536879	0.993316
CUT222	CUTs	7	10	8	15	0.479145	0.747937
CUT223	CUTs	2	0	5	12	3.05412	0.14496
CUT224	CUTs	3	1	2	1	-0.186423	NA
CUT225	CUTs	4	5	1	0	-2.96399	NA
CUT226	CUTs	479	351	172	368	-0.618157	0.0213532
CUT227	CUTs	42	67	64	116	0.777063	0.0924596
CUT228	CUTs	63	67	26	39	-0.929212	0.0867918
CUT229	CUTs	45	59	19	36	-0.880714	0.151179
CUT230	CUTs	0	0	0	0	NA	NA
CUT231	CUTs	35	24	6	8	-2.01111	0.0243947
CUT232	CUTs	8	6	7	5	-0.0238326	0.993054
CUT233	CUTs	21	25	8	16	-0.911073	0.351174
CUT234	CUTs	183	184	130	294	0.209373	0.550131
CUT235	CUTs	266	295	243	419	0.295573	0.280227
CUT236	CUTs	30	30	10	22	-0.897765	0.2824
CUT237	CUTs	148	225	141	231	0.0707653	0.87518
CUT238	CUTs	1	1	1	0	-0.66304	NA
CUT239	CUTs	1	0	0	0	-1.37687	NA
CUT240	CUTs	1	0	0	0	-1.37687	NA
CUT241	CUTs	34	49	10	17	-1.56586	0.026944
CUT242	CUTs	0	1	1	1	1.17053	NA
CUT243	CUTs	0	0	0	0	NA	NA
CUT244	CUTs	1	0	0	1	-0.050078	NA
CUT245	CUTs	1	3	6	2	1.36425	NA
CUT246	CUTs	80	106	12	26	-2.27052	2.33342e-06
CUT247	CUTs	233	185	139	409	0.33208	0.352531
CUT248	CUTs	11	8	0	1	-4.2165	0.0614553
CUT249	CUTs	7	8	6	10	0.151632	0.93569
CUT250	CUTs	63	42	5	15	-2.42294	0.000421199
CUT251	CUTs	17	18	6	29	-0.108439	0.936645
CUT252	CUTs	27	20	3	9	-1.99999	0.0477305
CUT253	CUTs	2	0	5	2	2.10502	NA
CUT254	CUTs	14	22	4	8	-1.55096	0.175233
CUT255	CUTs	29	32	30	50	0.450798	0.537021
CUT256	CUTs	14	25	18	26	0.270472	0.807337
CUT257	CUTs	22	33	11	31	-0.410333	0.666881
CUT258	CUTs	5	1	1	0	-2.37394	NA
CUT259	CUTs	2	6	1	2	-1.36743	NA
CUT260	CUTs	38	50	9	27	-1.31452	0.0542959
CUT261	CUTs	2	6	0	0	-4.30611	NA
CUT262	CUTs	12	6	7	20	0.532763	0.710742
CUT263	CUTs	22	24	8	13	-1.07506	0.268647
CUT264	CUTs	45	41	23	59	-0.088893	0.916702
CUT265	CUTs	49	79	8	15	-2.43461	6.71011e-05
CUT266	CUTs	53	40	13	37	-0.931712	0.166455
CUT267	CUTs	12	9	1	16	-0.518743	0.769177
CUT268	CUTs	18	28	6	16	-1.07118	0.280229
CUT269	CUTs	13	20	6	2	-1.77731	0.173466
CUT270	CUTs	48	36	13	46	-0.581703	0.445049
CUT271	CUTs	11	15	6	5	-1.0761	0.441703
CUT272	CUTs	18	26	16	25	-0.0264327	0.982251
CUT273	CUTs	19	10	5	7	-1.21167	0.353215
CUT274	CUTs	14	6	15	22	0.955634	0.395059
CUT275	CUTs	23	26	8	12	-1.22477	0.1919
CUT276	CUTs	9	11	7	8	-0.29156	0.858912
CUT277	CUTs	2	3	0	0	-3.64422	NA
CUT278	CUTs	44	50	13	25	-1.27477	0.0465121
CUT279	CUTs	14	18	20	25	0.60986	0.533981
CUT280	CUTs	40	36	5	10	-2.32123	0.00314171
CUT281	CUTs	77	108	47	90	-0.393947	0.427236
CUT282	CUTs	45	51	27	42	-0.407072	0.554357
CUT283	CUTs	25	32	10	18	-0.980399	0.255358
CUT284	CUTs	18	24	21	47	0.704994	0.373499
CUT285	CUTs	21	26	16	16	-0.405339	0.70272
CUT286	CUTs	22	26	1	10	-2.2323	0.0349228
CUT287	CUTs	5	18	0	12	-1.16032	0.514885
CUT288	CUTs	19	24	2	5	-2.61142	0.0202986
CUT289	CUTs	173	171	140	350	0.491317	0.100203
CUT290	CUTs	200	240	189	390	0.418483	0.120597
CUT291	CUTs	156	182	56	109	-1.0029	0.0020039
CUT292	CUTs	45	63	69	131	0.930354	0.0280173
CUT293	CUTs	8	10	2	0	-2.89098	0.151858
CUT294	CUTs	11	15	1	7	-1.79453	0.214501
CUT295	CUTs	65	56	11	18	-2.01705	0.000653631
CUT296	CUTs	2	2	1	0	-1.7244	NA
CUT297	CUTs	27	34	25	29	-0.0475909	0.965201
CUT298	CUTs	8	8	1	6	-1.29528	0.486077
CUT299	CUTs	38	27	7	24	-1.1286	0.172622
CUT300	CUTs	10	5	3	7	-0.600975	0.754289
CUT301	CUTs	30	38	6	20	-1.42397	0.072904
CUT302	CUTs	2	0	3	5	2.02935	NA
CUT303	CUTs	43	24	5	18	-1.6097	0.0561857
CUT304	CUTs	10	9	0	3	-2.79048	0.143279
CUT305	CUTs	43	40	5	18	-1.89759	0.00946625
CUT306	CUTs	211	219	150	226	-0.113049	0.782387
CUT307	CUTs	5	3	3	9	0.530252	0.811793
CUT308	CUTs	2	0	1	6	1.61881	NA
CUT309	CUTs	14	8	0	1	-4.4318	0.0412457
CUT310	CUTs	5	12	4	4	-0.935048	0.601768
CUT311	CUTs	112	107	9	36	-2.33575	4.05422e-07
CUT312	CUTs	6	6	5	6	-0.0129435	0.996335
CUT313	CUTs	12	20	4	5	-1.73276	0.165175
CUT314	CUTs	14	18	21	35	0.870834	0.306588
CUT315	CUTs	4	6	0	2	-2.45281	NA
CUT316	CUTs	21	20	20	9	-0.207903	0.873514
CUT317	CUTs	21	18	1	7	-2.37242	0.0449698
CUT318	CUTs	5	0	0	0	-3.70863	NA
CUT319	CUTs	23	22	0	4	-3.57775	0.00581383
CUT320	CUTs	60	46	6	10	-2.69412	9.02243e-05
CUT321	CUTs	47	51	9	10	-2.27287	0.000930531
CUT322	CUTs	60	44	5	9	-2.86897	5.83417e-05
CUT323	CUTs	36	44	37	52	0.247769	0.741651
CUT324	CUTs	0	0	0	0	NA	NA
CUT325	CUTs	49	49	20	51	-0.480174	0.475744
CUT326	CUTs	154	231	107	263	-0.0622642	0.891004
CUT327	CUTs	17	9	0	4	-2.84601	0.078971
CUT328	CUTs	8	2	10	11	1.18972	0.441703
CUT329	CUTs	11	7	2	3	-1.79998	0.300009
CUT330	CUTs	48	56	4	9	-2.98386	2.94608e-05
CUT331	CUTs	21	16	29	43	1.03727	0.159357
CUT332	CUTs	26	24	3	6	-2.45358	0.0150179
CUT333	CUTs	8	9	0	2	-3.18444	0.13534
CUT334	CUTs	2	4	5	11	1.43385	0.43172
CUT335	CUTs	20	13	6	9	-1.08106	0.366747
CUT336	CUTs	7	10	1	6	-1.3724	0.448234
CUT337	CUTs	53	63	29	84	-0.0724078	0.923855
CUT338	CUTs	5	5	13	14	1.57947	0.215861
CUT339	CUTs	9	8	7	9	0.0110591	0.996335
CUT340	CUTs	50	66	17	25	-1.39065	0.0172487
CUT341	CUTs	45	37	4	11	-2.46499	0.00138365
[truncated: 8,432 more rows]

## Sheet: B) rrp6∆ vs. WT
Name	Type	WT (YFN116)_rep1_counts	WT (YFN116)_rep2_counts	rrp6∆ (YFN543)_rep1_counts	rrp6∆ (YFN543)_rep1_counts	Log2(FC) rrp6∆ vs. WT	P-adj
10F134	XUTs	13	20	40	24	0.0632624	0.950344
10F136	XUTs	21	16	214	247	2.76902	2.0276e-15
10F143	XUTs	0	4	4	5	0.235773	0.926839
10F149	XUTs	1	2	9	2	0.975567	0.671346
10F15	XUTs	42	39	161	143	1.033	0.00205836
10F151	XUTs	2	2	34	26	3.03106	0.00538855
10F158	XUTs	0	0	4	4	3.56633	0.239511
10F170	XUTs	0	0	8	3	4.02114	0.136419
10F174	XUTs	0	0	3	0	2.14083	NA
10F179	XUTs	1	0	5	4	2.30682	0.427348
10F18	XUTs	0	0	0	0	NA	NA
10F183	XUTs	2	0	2	3	0.502414	0.885464
10F200	XUTs	0	0	3	7	3.89232	0.162176
10F203	XUTs	22	11	44	41	0.506569	0.477253
10F209	XUTs	0	0	0	0	NA	NA
10F213	XUTs	1	1	4	4	1.12402	0.671346
10F22	XUTs	1	0	1	4	1.46937	0.686489
10F25	XUTs	4	7	18	8	0.345142	0.808648
10F253	XUTs	0	0	5	5	3.88826	0.158972
10F293	XUTs	2	3	9	7	0.790743	0.655997
10F300	XUTs	0	0	0	0	NA	NA
10F305	XUTs	0	2	10	6	2.08658	0.311263
10F310	XUTs	1	2	5	6	0.983524	0.655997
10F32	XUTs	9	7	14	10	-0.285942	0.825321
10F321	XUTs	3	4	4	10	0.118634	0.956097
10F324	XUTs	5	0	7	1	-0.138477	0.96443
10F326	XUTs	1	2	3	5	0.523496	0.840068
10F37	XUTs	0	0	5	2	3.36933	0.29962
10F42	XUTs	13	12	60	48	1.23575	0.041353
10F44	XUTs	8	2	49	38	2.26568	0.00400776
10F48	XUTs	47	34	320	318	2.10829	1.39605e-15
10F49	XUTs	4	3	156	130	4.47961	1.16596e-11
10F50	XUTs	1	0	5	2	1.94292	0.543453
10F55	XUTs	32	24	151	171	1.65451	2.00333e-06
10F57	XUTs	3	1	7	6	0.848303	0.673046
10F6	XUTs	2	1	1	6	0.370815	0.898809
10F62	XUTs	19	18	40	30	0.0432239	0.96443
10F65	XUTs	1	1	8	6	1.93065	0.362424
10F67	XUTs	0	0	2	1	2.14791	NA
10F68	XUTs	1	2	24	19	2.95749	0.0232717
10F73	XUTs	0	2	12	11	2.61958	0.144232
10F76	XUTs	4	5	85	69	3.21889	1.68805e-06
10F82	XUTs	3	2	18	9	1.56243	0.269444
10F85	XUTs	4	8	19	15	0.607157	0.60937
10F86	XUTs	34	39	253	259	1.93168	1.83134e-11
10F87	XUTs	3	6	56	54	2.72716	0.000191829
10F9	XUTs	2	4	68	78	3.72566	1.62095e-06
10R101	XUTs	1	3	284	216	6.08858	3.42924e-14
10R114	XUTs	9	7	42	37	1.43272	0.0502621
10R116	XUTs	4	2	18	18	1.72248	0.149273
10R117	XUTs	3	6	54	50	2.64565	0.000371827
10R119	XUTs	0	0	3	2	2.88623	0.444074
10R125	XUTs	0	0	6	2	3.56124	0.247132
10R128	XUTs	28	27	113	96	1.04981	0.0110399
10R131	XUTs	3	5	38	42	2.43968	0.0032441
10R136	XUTs	11	2	38	31	1.56313	0.0662983
10R143	XUTs	0	0	0	0	NA	NA
10R155	XUTs	9	12	108	86	2.32635	4.03534e-06
10R165	XUTs	4	1	14	12	1.52762	0.287591
10R181	XUTs	20	15	284	246	3.04896	5.41616e-19
10R186	XUTs	39	29	155	154	1.31478	0.000105108
10R197	XUTs	4	2	34	57	3.05924	0.00051741
10R203	XUTs	10	10	219	190	3.47897	3.50472e-16
10R206	XUTs	23	22	54	46	0.275751	0.677857
10R209	XUTs	6	5	30	30	1.57547	0.0695929
10R21	XUTs	7	6	291	285	4.5966	2.13644e-22
10R212	XUTs	10	9	55	73	1.87991	0.00142582
10R228	XUTs	1	4	17	20	1.99076	0.106942
10R233	XUTs	38	41	51	52	-0.496885	0.328709
10R234	XUTs	0	1	16	15	4.07151	0.0439933
10R237	XUTs	20	15	280	237	3.01305	2.52952e-18
10R242	XUTs	20	18	163	146	2.14952	1.50161e-08
10R245	XUTs	2	0	9	14	2.6797	0.140379
10R248	XUTs	0	0	0	0	NA	NA
10R249	XUTs	200	145	326	335	0.0713573	0.81161
10R254	XUTs	4	3	95	95	3.89079	2.69341e-08
10R257	XUTs	0	0	4	5	3.73738	0.194117
10R258	XUTs	0	1	2	6	2.10805	0.487513
10R276	XUTs	123	115	460	408	0.991221	1.05601e-06
10R284	XUTs	1	1	2	3	0.447198	0.893496
10R287	XUTs	76	82	173	144	0.124102	0.755945
10R288	XUTs	11	12	34	29	0.57415	0.484508
10R29	XUTs	3	4	57	39	2.89729	0.000407838
10R39	XUTs	40	27	156	132	1.23633	0.000499487
10R50	XUTs	0	0	4	3	3.37224	0.294748
10R52	XUTs	29	22	95	74	0.857977	0.0676959
10R6	XUTs	1	4	5	1	-0.658371	0.782193
10R61	XUTs	0	0	1	0	0.56278	NA
10R62	XUTs	0	0	3	1	2.56125	NA
10R63	XUTs	1	1	1	1	-0.877145	0.818258
10R78	XUTs	4	2	9	12	0.948654	0.538118
10R84	XUTs	81	67	239	214	0.741935	0.00645738
10R89	XUTs	1	1	8	9	2.21291	0.261303
10R92	XUTs	22	14	59	57	0.822912	0.153402
10R93	XUTs	1	0	0	1	-0.845758	NA
11F10	XUTs	38	45	69	67	-0.170106	0.757788
11F102	XUTs	4	3	19	10	1.17828	0.369029
11F103	XUTs	2	1	22	19	2.90556	0.0283812
11F113	XUTs	0	1	2	5	1.91315	0.546296
11F136	XUTs	1	0	3	2	1.46144	0.684219
11F137	XUTs	0	0	0	0	NA	NA
11F153	XUTs	11	7	258	253	3.95684	1.27225e-20
11F155	XUTs	16	13	59	48	1.01133	0.0927954
11F16	XUTs	4	6	11	13	0.376272	0.791348
11F160	XUTs	0	0	0	0	NA	NA
11F176	XUTs	3	3	60	71	3.57513	6.41367e-06
11F183	XUTs	97	84	128	123	-0.401189	0.222314
11F187	XUTs	2	1	12	8	1.87203	0.277239
11F191	XUTs	5	0	16	20	2.01335	0.12186
11F200	XUTs	161	173	347	425	0.329659	0.184785
11F204	XUTs	3	0	40	50	4.04906	0.000243433
11F205	XUTs	0	0	1	1	1.56632	NA
11F207	XUTs	4	4	18	17	1.25305	0.27964
11F209	XUTs	12	12	23	24	0.0929707	0.929615
11F210	XUTs	3	9	22	15	0.7192	0.535924
11F216	XUTs	0	0	3	4	3.37513	0.29445
11F230	XUTs	116	129	870	831	1.91606	1.63917e-28
11F231	XUTs	4	9	25	22	0.957996	0.333925
11F244	XUTs	27	30	44	21	-0.69476	0.279625
11F25	XUTs	58	58	470	417	2.05835	1.19357e-19
11F252	XUTs	0	0	11	5	4.56252	0.0530617
11F258	XUTs	30	35	37	56	-0.363792	0.548298
11F259	XUTs	0	0	0	0	NA	NA
11F26	XUTs	12	11	196	198	3.22507	3.27138e-15
11F264	XUTs	68	58	101	122	-0.0477892	0.922871
11F265	XUTs	0	0	0	1	0.574838	NA
11F27	XUTs	2	3	24	40	2.80025	0.00593113
11F270	XUTs	1	0	33	42	5.3583	0.00221408
11F272	XUTs	36	25	45	54	-0.166639	0.798832
11F281	XUTs	0	0	0	0	NA	NA
11F288	XUTs	2	1	5	3	0.553691	0.830943
11F290	XUTs	3	5	23	11	1.196	0.326831
11F292	XUTs	0	0	0	0	NA	NA
11F298	XUTs	1	1	4	1	0.44005	0.897328
11F3	XUTs	7	7	26	17	0.740545	0.467924
11F300	XUTs	0	0	1	0	0.56278	NA
11F35	XUTs	6	4	14	20	0.900765	0.442268
11F36	XUTs	15	14	55	47	0.93912	0.128016
11F43	XUTs	1	1	4	2	0.705662	0.816649
11F58	XUTs	11	13	59	58	1.40572	0.0158275
11F64	XUTs	48	36	168	161	1.10025	0.000646808
11F68	XUTs	24	10	33	38	0.210681	0.804437
11F77	XUTs	54	42	106	146	0.524261	0.189222
11F8	XUTs	0	0	0	0	NA	NA
11F84	XUTs	0	0	4	3	3.37224	0.294748
11F87	XUTs	12	24	45	47	0.457553	0.520399
11F88	XUTs	6	4	47	44	2.31689	0.00205022
11F90	XUTs	17	11	85	94	1.8099	0.000176104
11R107	XUTs	10	9	120	111	2.73009	2.2246e-08
11R109	XUTs	2	1	116	120	5.42669	1.80967e-08
11R112	XUTs	1	1	18	13	3.07815	0.057185
11R114	XUTs	65	58	170	174	0.610292	0.0529626
11R117	XUTs	45	35	156	157	1.09804	0.000881445
11R12	XUTs	35	24	101	129	1.09718	0.00644568
11R124	XUTs	96	95	215	217	0.300739	0.321624
11R125	XUTs	8	1	52	61	2.7991	0.000185338
11R128	XUTs	0	1	21	11	4.11431	0.0420651
11R13	XUTs	23	24	145	162	1.83146	5.18359e-07
11R130	XUTs	13	6	38	35	1.08327	0.156122
11R134	XUTs	10	11	44	36	1.05018	0.141154
11R139	XUTs	1	0	7	4	2.59365	0.339293
11R142	XUTs	0	0	0	0	NA	NA
11R146	XUTs	1	2	3	4	0.329254	0.906207
11R158	XUTs	9	4	61	59	2.34382	0.000323234
11R163	XUTs	9	13	26	11	-0.142255	0.905173
11R166	XUTs	10	10	29	26	0.582422	0.508435
11R167	XUTs	0	0	6	4	3.88624	0.16035
11R171	XUTs	6	7	86	70	2.70692	6.74813e-06
11R173	XUTs	1	3	4	5	0.266848	0.913515
11R192	XUTs	0	0	3	2	2.88623	0.444074
11R2	XUTs	7	6	11	14	0.0720048	0.96443
11R208	XUTs	0	0	0	0	NA	NA
11R209	XUTs	0	0	0	0	NA	NA
11R223	XUTs	13	15	370	454	4.0046	6.55208e-31
11R226	XUTs	35	34	171	156	1.36874	3.52931e-05
11R246	XUTs	0	1	3	1	1.08906	0.780501
11R247	XUTs	2	0	10	13	2.67859	0.13923
11R249	XUTs	8	3	120	97	3.43642	6.54999e-09
11R260	XUTs	18	10	134	123	2.33241	7.57155e-08
11R262	XUTs	39	26	92	98	0.68202	0.122036
11R265	XUTs	3	1	36	35	3.28586	0.00163146
11R267	XUTs	3	2	15	19	1.89862	0.132065
11R270	XUTs	0	0	0	0	NA	NA
11R273	XUTs	14	8	61	59	1.58307	0.00699897
11R274	XUTs	1	1	3	7	1.44988	0.550793
11R39	XUTs	1	2	12	8	1.84713	0.282296
11R48	XUTs	0	0	0	0	NA	NA
11R53	XUTs	0	0	0	0	NA	NA
11R63	XUTs	9	7	81	59	2.25679	0.000145663
11R7	XUTs	0	0	0	0	NA	NA
11R8	XUTs	3	2	2	0	-2.19142	0.402104
11R81	XUTs	3	6	20	23	1.3663	0.193386
11R82	XUTs	2	1	7	3	0.873491	0.706474
11R92	XUTs	4	7	25	13	0.895089	0.429573
11R94	XUTs	8	5	30	30	1.34074	0.116746
11R97	XUTs	0	0	0	0	NA	NA
12F1	XUTs	0	0	6	6	4.1513	0.107011
12F109	XUTs	4	4	99	69	3.51623	3.79913e-07
12F113	XUTs	3	4	12	7	0.554145	0.7311
12F121	XUTs	1	2	53	50	4.2232	7.13711e-05
12F134	XUTs	4	2	4	4	-0.441745	0.83769
12F142	XUTs	4	4	66	83	3.34596	2.00923e-06
12F150	XUTs	13	7	46	36	1.17264	0.101576
12F154	XUTs	0	0	11	6	4.65082	0.0440406
12F157	XUTs	24	25	68	85	0.766071	0.124117
12F159	XUTs	1	4	6	4	0.0870209	0.972721
12F16	XUTs	4	6	133	116	3.75978	1.72014e-10
12F160	XUTs	1	0	1	1	0.145498	NA
12F165	XUTs	14	12	249	219	3.29658	6.74747e-18
12F180	XUTs	5	3	17	26	1.56303	0.144232
12F184	XUTs	4	5	14	11	0.590594	0.669271
12F185	XUTs	2	4	30	35	2.55341	0.0074705
12F188	XUTs	1170	1027	3870	3214	0.814761	5.98774e-12
12F191	XUTs	28	28	81	53	0.379864	0.507908
12F193	XUTs	1	4	71	49	3.69781	2.05606e-05
12F198	XUTs	8	7	27	24	0.891991	0.331342
12F208	XUTs	41	37	275	264	1.91493	4.30981e-12
12F209	XUTs	9	10	126	102	2.70748	4.18923e-08
12F215	XUTs	0	2	3	2	0.389126	0.909918
12F216	XUTs	0	0	11	7	4.73401	0.0363991
12F221	XUTs	2	5	20	22	1.69247	0.124359
12F231	XUTs	13	14	54	74	1.36883	0.0149295
12F236	XUTs	1	2	100	94	5.13868	1.61044e-07
12F239	XUTs	0	0	0	0	NA	NA
12F247	XUTs	3	1	31	40	3.28742	0.00169608
12F253	XUTs	3	0	39	51	4.04939	0.000247677
12F257	XUTs	12	8	141	167	3.07618	1.28496e-11
12F270	XUTs	7	10	73	65	2.13892	0.000247427
12F272	XUTs	5	4	24	26	1.60314	0.0978418
12F287	XUTs	0	1	3	1	1.08906	0.780501
12F289	XUTs	7	3	17	23	1.14432	0.292831
12F293	XUTs	14	10	164	171	2.93299	2.64018e-12
12F317	XUTs	3	0	23	20	2.99135	0.0245517
12F33	XUTs	0	0	0	0	NA	NA
12F336	XUTs	3	4	40	42	2.67166	0.00162193
12F347	XUTs	15	10	76	66	1.63781	0.00222153
12F359	XUTs	7	8	41	49	1.70747	0.0145778
12F361	XUTs	0	0	4	2	3.14791	0.363983
12F375	XUTs	1	0	6	3	2.30481	0.429731
12F394	XUTs	3	4	7	7	0.115244	0.956571
12F4	XUTs	0	0	1	0	0.56278	NA
12F404	XUTs	35	36	336	393	2.48489	2.12143e-20
12F46	XUTs	0	0	1	0	0.56278	NA
12F54	XUTs	10	7	118	101	2.81663	3.91975e-08
12F56	XUTs	5	2	23	25	1.91863	0.0646591
12F6	XUTs	25	29	97	55	0.608998	0.263884
12F68	XUTs	4	4	41	36	2.39113	0.0042539
12F70	XUTs	5	10	71	70	2.34625	9.51123e-05
12F77	XUTs	22	19	150	121	1.85083	2.31757e-06
12F82	XUTs	2	3	8	5	0.489382	0.805199
12F84	XUTs	15	18	129	122	2.04801	9.27658e-07
12F85	XUTs	8	11	42	34	1.11529	0.133308
12F86	XUTs	1	0	3	3	1.7253	0.60937
12F87	XUTs	0	0	2	0	1.5559	NA
12F9	XUTs	1	0	0	1	-0.845758	NA
12F90	XUTs	148	136	442	464	0.79938	4.2866e-05
12F94	XUTs	6	7	63	50	2.24079	0.000706418
12F96	XUTs	0	0	2	0	1.5559	NA
12F98	XUTs	74	33	307	288	1.61912	1.10789e-08
12R107	XUTs	7	6	29	26	1.20788	0.173289
12R113	XUTs	37	16	97	107	1.08971	0.0143794
12R126	XUTs	6	3	13	19	0.971956	0.427348
12R135	XUTs	0	0	1	2	2.15465	NA
12R137	XUTs	0	0	4	0	2.55583	NA
12R141	XUTs	7	1	14	16	1.06934	0.41779
12R144	XUTs	6	2	32	26	2.00016	0.034692
12R149	XUTs	0	0	0	0	NA	NA
12R16	XUTs	0	0	28	21	6.1796	0.00068175
12R162	XUTs	0	0	2	5	3.37803	0.297394
12R167	XUTs	0	1	2	2	1.09446	0.777029
12R171	XUTs	12	15	27	21	-0.0545641	0.962421
12R191	XUTs	0	0	0	0	NA	NA
12R197	XUTs	0	0	3	3	3.15129	0.361002
12R207	XUTs	16	18	49	55	0.733958	0.232908
12R212	XUTs	0	2	12	4	2.08246	0.32224
12R215	XUTs	6	3	9	5	-0.221861	0.903316
12R220	XUTs	0	0	5	1	3.14447	0.374674
12R229	XUTs	26	12	53	47	0.539492	0.413895
12R232	XUTs	3	0	12	19	2.52818	0.0918609
12R235	XUTs	209	160	444	441	0.393266	0.0600773
12R237	XUTs	97	80	801	864	2.3624	7.25161e-39
12R239	XUTs	1	4	5	7	0.35482	0.869604
12R244	XUTs	3	1	18	12	2.04759	0.14346
12R249	XUTs	14	22	218	208	2.68242	8.94734e-14
12R250	XUTs	10	11	26	18	0.185964	0.864309
12R257	XUTs	0	1	0	1	-0.919321	NA
12R265	XUTs	11	5	13	8	-0.463151	0.715082
12R267	XUTs	0	0	2	2	2.56633	NA
12R27	XUTs	4	2	9	1	-0.126235	0.961783
12R287	XUTs	8	12	62	51	1.61301	0.00874268
12R297	XUTs	22	22	142	126	1.73032	6.58897e-06
12R299	XUTs	677	559	942	1107	-0.140657	0.445836
12R3	XUTs	0	2	5	3	1.0739	0.692407
12R304	XUTs	1	2	7	9	1.52686	0.416689
12R306	XUTs	17	8	142	127	2.5635	7.78918e-09
12R31	XUTs	0	1	9	2	2.55955	0.354943
12R313	XUTs	0	0	0	0	NA	NA
12R328	XUTs	12	4	41	39	1.46837	0.0507672
12R33	XUTs	1	1	12	10	2.58373	0.151157
12R336	XUTs	70	67	117	118	-0.0972874	0.828099
12R337	XUTs	3	4	47	65	3.12367	7.13711e-05
12R341	XUTs	5	3	27	19	1.6564	0.109278
12R346	XUTs	4	5	87	88	3.4048	1.70555e-07
12R348	XUTs	6	4	40	47	2.25328	0.0032406
12R352	XUTs	85	69	411	431	1.57995	2.48313e-13
12R354	XUTs	0	0	3	1	2.56125	NA
12R361	XUTs	25	9	118	142	2.07978	1.70917e-06
12R370	XUTs	25	20	47	48	0.207602	0.763533
12R385	XUTs	15	17	60	65	1.08693	0.0490115
12R387	XUTs	2	8	35	23	1.63148	0.0845351
12R389	XUTs	0	2	6	8	1.89554	0.381011
12R391	XUTs	0	0	3	2	2.88623	0.444074
12R44	XUTs	9	11	31	48	1.10268	0.135563
12R5	XUTs	0	0	0	0	NA	NA
12R50	XUTs	0	0	1	3	2.57139	0.543453
12R7	XUTs	0	0	1	0	0.56278	NA
12R76	XUTs	22	18	43	62	0.522824	0.410706
12R85	XUTs	0	0	0	0	NA	NA
12R96	XUTs	1	0	12	13	3.77647	0.075421
13F10	XUTs	1	0	25	30	4.91138	0.007145
13F106	XUTs	4	7	54	48	2.32834	0.00108171
13F112	XUTs	0	0	3	1	2.56125	NA
13F116	XUTs	1	2	12	12	2.1135	0.183165
13F12	XUTs	0	0	4	3	3.37224	0.294748
13F126	XUTs	0	0	1	0	0.56278	NA
13F129	XUTs	3	4	6	12	0.481241	0.773398
13F137	XUTs	9	5	107	97	2.99718	5.48838e-08
13F14	XUTs	34	26	155	117	1.30949	0.000435514
13F142	XUTs	0	0	6	7	4.26755	0.0880412
13F146	XUTs	6	5	29	45	1.88009	0.0202979
13F151	XUTs	10	9	43	28	1.02614	0.185187
13F153	XUTs	6	8	14	15	0.166101	0.902972
13F160	XUTs	1	2	16	15	2.48418	0.0861309
13F161	XUTs	18	19	74	75	1.13231	0.0228558
13F171	XUTs	4	2	7	10	0.644943	0.704361
13F174	XUTs	21	8	24	59	0.672095	0.4107
13F179	XUTs	0	1	0	0	-2.38209	NA
13F184	XUTs	0	3	10	18	2.3156	0.137153
13F191	XUTs	7	1	39	36	2.37873	0.00654913
13F192	XUTs	0	0	11	9	4.88726	0.0254525
13F195	XUTs	31	20	196	189	2.04894	1.07751e-09
13F199	XUTs	1	0	3	6	2.31127	0.428345
13F20	XUTs	1	0	3	4	1.94819	0.539794
13F201	XUTs	0	0	1	2	2.15465	NA
13F206	XUTs	12	5	20	23	0.485577	0.643311
13F208	XUTs	0	0	18	14	5.56508	0.00441883
13F209	XUTs	65	42	136	154	0.574634	0.11114
13F213	XUTs	0	0	11	10	4.95817	0.021432
13F214	XUTs	2	4	22	19	1.88394	0.0960863
13F217	XUTs	13	5	123	140	3.00685	8.57938e-10
13F218	XUTs	2	5	14	17	1.25216	0.322836
13F221	XUTs	4	2	5	11	0.559798	0.754726
13F222	XUTs	6	9	43	44	1.65225	0.0200865
13F229	XUTs	10	12	61	33	1.2114	0.0789068
13F239	XUTs	3	4	5	6	-0.23253	0.907515
13F247	XUTs	5	4	29	17	1.48009	0.149127
13F256	XUTs	4	4	31	35	2.16977	0.0140769
13F259	XUTs	13	15	38	32	0.440588	0.574336
13F261	XUTs	5	5	17	9	0.499111	0.713788
13F272	XUTs	4	1	57	37	3.36926	0.000258543
13F274	XUTs	1	0	3	2	1.46144	0.684219
13F286	XUTs	36	18	218	164	1.96006	2.74463e-08
13F294	XUTs	14	18	124	97	1.90597	1.76689e-05
13F3	XUTs	73	64	868	901	2.81789	8.41708e-51
13F30	XUTs	6	4	16	19	0.94163	0.411109
13F315	XUTs	7	2	46	38	2.36477	0.00341928
13F321	XUTs	16	14	29	41	0.350906	0.662515
13F333	XUTs	26	42	78	61	0.138323	0.828698
13F337	XUTs	1	2	11	7	1.69417	0.345212
13F339	XUTs	29	30	99	128	1.06782	0.0082278
13F342	XUTs	2	0	4	6	1.49187	0.550321
13F349	XUTs	5	3	52	38	2.62274	0.00111661
13F350	XUTs	35	21	55	67	0.26208	0.670818
13F354	XUTs	18	9	48	39	0.828089	0.232739
13F359	XUTs	5	9	28	28	1.11021	0.211818
13F364	XUTs	3	2	10	5	0.715763	0.697349
13F370	XUTs	10	5	336	322	4.58521	2.52896e-25
13F373	XUTs	6	5	29	26	1.44946	0.108667
13F375	XUTs	18	8	36	25	0.374119	0.673817
13F376	XUTs	82	79	193	228	0.511653	0.0843736
13F390	XUTs	8	8	22	20	0.515343	0.618031
13F393	XUTs	20	9	31	29	0.194047	0.834074
13F398	XUTs	57	51	121	92	0.10487	0.832476
13F43	XUTs	4	7	12	10	0.10682	0.94843
13F5	XUTs	0	1	19	11	4.02136	0.0493886
13F51	XUTs	20	21	72	71	0.924687	0.0685082
13F52	XUTs	7	4	37	37	1.88484	0.0181472
13F54	XUTs	0	0	1	3	2.57139	0.543453
13F59	XUTs	1	0	7	3	2.45561	0.384232
13F63	XUTs	0	1	6	6	2.69402	0.301395
13F65	XUTs	21	12	33	46	0.399683	0.599674
13F80	XUTs	38	28	113	114	0.913556	0.0196625
13F98	XUTs	4	1	9	18	1.58643	0.270423
13R108	XUTs	195	161	516	434	0.544027	0.00678649
13R110	XUTs	3	5	28	37	2.13968	0.01715
13R114	XUTs	8	12	64	47	1.58644	0.0112342
13R117	XUTs	17	24	28	32	-0.337956	0.659046
13R124	XUTs	5	2	21	20	1.69157	0.127595
13R127	XUTs	2	1	4	6	0.878763	0.701759
13R132	XUTs	60	53	102	107	0.0140698	0.978749
13R134	XUTs	2	4	15	20	1.65652	0.172607
13R14	XUTs	7	4	11	12	0.203085	0.893682
13R147	XUTs	0	0	1	1	1.56632	NA
13R153	XUTs	34	37	234	197	1.72312	1.92581e-08
13R177	XUTs	7	9	21	28	0.733109	0.442094
13R182	XUTs	0	1	2	1	0.672162	0.88262
13R183	XUTs	2	0	0	4	0.195855	0.965115
13R188	XUTs	0	0	0	0	NA	NA
13R196	XUTs	28	25	147	126	1.49065	5.51512e-05
13R199	XUTs	0	0	6	5	4.02485	0.130956
13R2	XUTs	4	6	28	33	1.72602	0.0501351
13R20	XUTs	15	14	192	178	2.79916	5.28287e-13
13R201	XUTs	1	1	4	1	0.44005	0.897328
13R216	XUTs	9	7	32	35	1.19619	0.130956
13R217	XUTs	9	9	63	51	1.78634	0.00375811
13R228	XUTs	21	8	208	220	3.02165	4.71482e-15
13R232	XUTs	3	1	10	13	1.66933	0.282814
13R234	XUTs	23	11	73	54	1.04169	0.0678759
13R236	XUTs	8	7	12	12	-0.194964	0.886733
13R242	XUTs	0	2	14	8	2.55164	0.164102
13R245	XUTs	8	1	8	7	-0.0917085	0.965241
13R253	XUTs	1	2	41	45	3.96292	0.000309393
13R255	XUTs	4	2	29	28	2.38315	0.0167862
13R27	XUTs	0	0	8	13	4.96106	0.0218696
13R272	XUTs	0	0	0	0	NA	NA
13R275	XUTs	3	2	50	38	3.2661	0.000395478
13R276	XUTs	0	0	3	5	3.56886	0.240014
13R279	XUTs	20	24	164	159	1.9967	4.23204e-08
13R293	XUTs	36	25	142	163	1.45491	3.3935e-05
13R294	XUTs	1	5	54	60	3.35977	4.33874e-05
13R297	XUTs	1	0	10	8	3.30277	0.154509
13R303	XUTs	8	4	45	29	1.76039	0.0289432
13R307	XUTs	1	3	70	64	4.18513	4.58948e-06
13R313	XUTs	6	4	29	27	1.61754	0.0751734
13R316	XUTs	17	5	39	39	0.978422	0.198624
13R330	XUTs	50	28	129	124	0.836277	0.0289435
13R340	XUTs	9	3	75	71	2.74409	1.41012e-05
13R341	XUTs	10	3	102	101	3.10372	5.43052e-08
13R356	XUTs	0	0	0	0	NA	NA
13R357	XUTs	4	1	12	6	0.998598	0.562359
13R362	XUTs	14	14	38	29	0.380819	0.641217
13R378	XUTs	0	0	3	3	3.15129	0.361002
13R385	XUTs	2	1	19	20	2.83457	0.0351956
13R388	XUTs	14	7	7	16	-0.720816	0.515231
13R389	XUTs	12	5	22	24	0.582286	0.558769
13R400	XUTs	2	2	14	17	2.07987	0.126359
13R402	XUTs	5	5	31	37	1.89091	0.0239759
13R411	XUTs	9	14	83	81	1.94996	0.000174357
13R422	XUTs	0	2	1	0	-1.95005	0.650587
13R47	XUTs	15	15	92	80	1.64294	0.000634574
13R52	XUTs	2	0	1	2	-0.227208	0.958818
13R69	XUTs	1	0	5	2	1.94292	0.543453
13R73	XUTs	6	4	25	33	1.66981	0.0642081
13R87	XUTs	40	24	457	455	2.96556	5.77772e-30
13R88	XUTs	0	2	8	14	2.55703	0.163308
13R97	XUTs	3	4	6	17	0.836725	0.577812
14F101	XUTs	9	7	100	64	2.48434	1.60907e-05
14F102	XUTs	78	42	256	237	1.17819	3.12448e-05
14F115	XUTs	0	0	5	3	3.5638	0.241038
14F116	XUTs	0	1	10	17	3.87389	0.0642081
14F118	XUTs	27	20	93	105	1.20629	0.00486536
14F123	XUTs	15	21	144	132	2.05624	3.16591e-07
14F126	XUTs	3	1	10	20	2.05321	0.147434
14F133	XUTs	1	5	13	7	0.822888	0.617637
14F142	XUTs	47	48	202	173	1.10316	0.000302078
14F166	XUTs	3	3	15	10	1.18099	0.403263
14F171	XUTs	45	53	113	158	0.58706	0.134151
14F190	XUTs	0	0	2	2	2.56633	NA
14F20	XUTs	3	0	1	1	-1.39248	0.682555
14F208	XUTs	8	5	35	24	1.31493	0.132083
14F214	XUTs	4	4	172	153	4.47	3.50741e-13
14F219	XUTs	0	0	2	8	3.89439	0.167378
14F231	XUTs	53	42	281	238	1.57823	8.13768e-09
14F234	XUTs	0	2	22	16	3.35124	0.029345
14F236	XUTs	16	28	74	78	0.897435	0.0829413
14F238	XUTs	0	0	6	6	4.1513	0.107011
14F240	XUTs	3	0	7	11	1.75322	0.347212
14F255	XUTs	7	3	6	4	-0.852982	0.599674
14F257	XUTs	2	3	36	37	2.98867	0.0018983
14F259	XUTs	34	27	97	82	0.681875	0.132418
14F269	XUTs	0	0	1	1	1.56632	NA
14F280	XUTs	1	1	8	5	1.8228	0.405105
14F289	XUTs	31	25	62	68	0.344683	0.542356
14F290	XUTs	25	30	72	64	0.423669	0.442268
14F292	XUTs	0	0	0	0	NA	NA
14F293	XUTs	25	16	105	116	1.56458	0.000191585
14F296	XUTs	0	0	10	7	4.65201	0.0431215
14F302	XUTs	5	3	24	17	1.49078	0.17017
14F303	XUTs	23	23	54	55	0.367975	0.550321
14F306	XUTs	9	14	44	34	0.873035	0.237182
14F310	XUTs	1	0	0	1	-0.845758	NA
14F313	XUTs	5	11	28	39	1.173	0.156122
14F319	XUTs	14	3	67	61	2.06252	0.00105947
14F324	XUTs	4	5	37	28	1.97161	0.0240053
14F37	XUTs	2	7	61	72	2.99699	2.08347e-05
14F39	XUTs	2	5	9	12	0.6876	0.65639
14F52	XUTs	6	8	39	29	1.39644	0.0831107
14F55	XUTs	20	21	209	193	2.41708	3.56051e-12
14F59	XUTs	7	3	146	116	3.84326	6.67842e-11
14F6	XUTs	11	9	64	72	1.8944	0.00078355
14F61	XUTs	6	4	23	15	1.05745	0.339778
14F67	XUTs	0	0	0	0	NA	NA
14F97	XUTs	16	15	15	12	-1.07544	0.191823
14F99	XUTs	2	0	4	5	1.34063	0.609837
14R1	XUTs	0	0	0	3	2.16167	NA
14R106	XUTs	2	6	102	108	3.83196	5.94031e-09
14R108	XUTs	1	2	35	27	3.48739	0.00315738
14R111	XUTs	0	0	0	0	NA	NA
14R114	XUTs	3	4	23	25	1.89729	0.0649844
14R128	XUTs	6	4	7	16	0.339696	0.823407
14R130	XUTs	47	42	108	102	0.364631	0.399021
14R132	XUTs	0	0	4	1	2.88214	0.45127
14R136	XUTs	0	1	8	2	2.42152	0.395365
14R141	XUTs	0	1	60	44	5.82155	0.000588587
14R153	XUTs	1	2	9	13	1.98897	0.22931
14R157	XUTs	0	0	3	2	2.88623	0.444074
14R162	XUTs	22	12	391	305	3.48698	4.17349e-25
14R179	XUTs	3	0	5	10	1.49487	0.460108
14R181	XUTs	0	1	12	6	3.27949	0.158872
14R184	XUTs	0	0	3	2	2.88623	0.444074
14R185	XUTs	2	5	8	6	0.0974636	0.96443
14R187	XUTs	14	9	25	36	0.544059	0.523738
14R192	XUTs	8	0	82	46	3.20565	0.18836
14R194	XUTs	5	3	98	52	3.3572	4.10183e-06
14R195	XUTs	12	8	33	26	0.693583	0.416992
14R201	XUTs	0	1	0	1	-0.919321	NA
14R204	XUTs	12	13	78	114	2.06581	3.12269e-05
14R205	XUTs	0	2	40	40	4.43678	0.000660295
14R21	XUTs	15	17	32	53	0.531344	0.463179
14R210	XUTs	6	11	76	62	2.1339	0.00030983
14R217	XUTs	1	1	119	121	6.03379	2.00585e-07
14R219	XUTs	20	19	370	302	3.23185	5.14175e-24
14R220	XUTs	3	1	43	49	3.65898	0.000197323
14R223	XUTs	9	10	47	48	1.44388	0.0282101
14R229	XUTs	3	0	6	4	0.910859	0.704489
14R232	XUTs	23	19	84	69	0.992573	0.0437269
14R245	XUTs	2	3	12	28	2.12113	0.0821564
14R249	XUTs	8	6	10	15	-0.0303555	0.984088
14R250	XUTs	14	7	50	34	1.13839	0.112598
14R264	XUTs	1	1	20	23	3.55283	0.0161803
14R269	XUTs	20	22	26	39	-0.248388	0.750102
14R271	XUTs	4	4	18	18	1.294	0.258041
14R284	XUTs	15	13	63	52	1.16446	0.045111
14R286	XUTs	5	3	19	19	1.38291	0.216368
14R291	XUTs	0	0	17	20	5.77661	0.00237145
14R293	XUTs	0	0	0	0	NA	NA
14R300	XUTs	0	1	3	2	1.41751	0.690201
14R308	XUTs	9	3	262	259	4.57247	2.74791e-20
14R319	XUTs	0	2	11	17	2.90902	0.0846501
14R327	XUTs	25	14	310	362	3.2406	8.10882e-24
14R330	XUTs	21	17	70	76	1.07115	0.033069
14R332	XUTs	0	0	2	1	2.14791	NA
14R340	XUTs	0	0	0	0	NA	NA
14R344	XUTs	18	16	70	71	1.17879	0.0215631
14R347	XUTs	0	0	0	0	NA	NA
14R348	XUTs	0	0	0	0	NA	NA
14R349	XUTs	0	0	0	0	NA	NA
14R36	XUTs	5	3	91	125	3.88675	4.35446e-09
14R40	XUTs	17	21	117	114	1.72355	3.47331e-05
14R44	XUTs	1	0	3	1	1.1381	0.773483
14R46	XUTs	90	65	137	164	0.0912686	0.83073
14R72	XUTs	0	2	10	8	2.26054	0.249288
14R74	XUTs	17	18	52	33	0.399602	0.58393
14R75	XUTs	33	35	95	85	0.525538	0.253045
14R89	XUTs	1	0	10	6	3.13223	0.192714
14R9	XUTs	0	0	1	0	0.56278	NA
14R90	XUTs	2	3	11	13	1.37937	0.34554
15F1	XUTs	1	6	38	25	2.26685	0.0190003
15F10	XUTs	30	26	339	376	2.80217	3.31748e-23
15F102	XUTs	8	9	16	19	0.16245	0.894466
15F104	XUTs	1	2	15	21	2.7027	0.0507672
15F107	XUTs	5	1	16	18	1.6553	0.185805
15F112	XUTs	12	12	92	95	2.08673	1.81616e-05
15F116	XUTs	0	0	0	1	0.574838	NA
15F129	XUTs	10	6	38	40	1.42069	0.0543035
15F14	XUTs	2617	2411	3625	2911	-0.498326	6.53822e-05
15F141	XUTs	0	1	4	2	1.68157	0.617733
15F144	XUTs	12	15	61	52	1.18314	0.0454373
15F148	XUTs	0	0	1	0	0.56278	NA
15F156	XUTs	25	25	59	54	0.299142	0.628462
15F157	XUTs	0	0	0	0	NA	NA
15F161	XUTs	0	0	0	3	2.16167	NA
15F163	XUTs	2	3	6	10	0.79403	0.656198
15F18	XUTs	145	125	655	639	1.38807	1.88944e-15
15F180	XUTs	0	0	25	25	6.21019	0.00060875
15F197	XUTs	32	18	82	66	0.703345	0.174234
15F200	XUTs	47	52	121	97	0.257745	0.567084
15F203	XUTs	2	1	29	16	3.03763	0.0200112
15F206	XUTs	0	0	0	0	NA	NA
15F21	XUTs	34	36	139	127	1.04776	0.00375127
15F217	XUTs	23	17	302	333	3.11848	9.5875e-23
15F232	XUTs	32	29	80	60	0.323213	0.558485
15F238	XUTs	2	5	48	31	2.60625	0.00296367
15F245	XUTs	3	2	20	10	1.71418	0.203954
15F249	XUTs	1	1	11	15	2.8273	0.0974097
15F26	XUTs	0	0	5	6	4.02669	0.130684
15F263	XUTs	0	0	1	1	1.56632	NA
15F265	XUTs	0	0	4	4	3.56633	0.239511
15F269	XUTs	48	39	87	115	0.345701	0.450342
15F27	XUTs	0	1	2	6	2.10805	0.487513
15F281	XUTs	0	0	1	0	0.56278	NA
15F286	XUTs	1	0	14	4	3.29896	0.163963
15F288	XUTs	6	4	108	118	3.62825	1.40885e-09
15F296	XUTs	10	9	86	63	2.09624	0.000182312
15F307	XUTs	54	52	116	115	0.247965	0.558891
15F309	XUTs	5	4	43	47	2.45077	0.00151785
15F312	XUTs	0	0	5	4	3.73514	0.194432
15F318	XUTs	0	0	0	0	NA	NA
15F33	XUTs	4	4	79	68	3.32459	2.2388e-06
15F331	XUTs	20	19	46	42	0.298306	0.672878
15F345	XUTs	19	16	94	98	1.5837	0.000403204
15F381	XUTs	3	3	84	67	3.77827	1.02489e-06
15F388	XUTs	22	20	126	88	1.47353	0.00065785
15F39	XUTs	4	2	25	20	2.04236	0.0618183
15F42	XUTs	1	1	20	26	3.65078	0.0122494
15F428	XUTs	0	0	2	1	2.14791	NA
15F431	XUTs	0	1	1	2	0.678198	0.881731
15F435	XUTs	0	1	4	2	1.68157	0.617733
15F436	XUTs	30	26	163	138	1.55268	1.20447e-05
15F444	XUTs	12	16	74	71	1.49018	0.00439887
15F448	XUTs	8	15	75	61	1.67385	0.00319866
15F45	XUTs	2	3	18	13	1.74739	0.182112
15F453	XUTs	3	9	75	49	2.47467	0.000284958
15F458	XUTs	2	1	144	93	5.43064	2.4627e-08
15F473	XUTs	0	1	3	6	2.27836	0.431781
15F479	XUTs	19	10	42	31	0.471184	0.546482
15F5	XUTs	1	0	12	4	3.13011	0.198776
15F6	XUTs	17	20	82	64	1.09891	0.0321527
15F89	XUTs	16	5	9	15	-0.647557	0.566586
15F9	XUTs	10	9	59	59	1.76119	0.00324461
15F94	XUTs	9	8	19	26	0.532354	0.595216
15R10	XUTs	4	2	9	5	0.361538	0.852315
15R101	XUTs	9	10	53	45	1.4879	0.0221044
15R116	XUTs	2	7	30	25	1.71164	0.0747498
15R12	XUTs	1	0	6	1	1.94061	0.551701
15R137	XUTs	0	0	3	0	2.14083	NA
15R148	XUTs	3	0	4	6	0.914596	0.70359
15R149	XUTs	3	7	9	10	0.0262923	0.987372
15R150	XUTs	15	19	138	98	1.91281	1.17731e-05
15R157	XUTs	0	0	1	2	2.15465	NA
15R162	XUTs	3	1	43	30	3.3244	0.00144593
15R169	XUTs	56	34	195	195	1.25153	4.40039e-05
15R172	XUTs	3	1	11	15	1.84555	0.211652
15R175	XUTs	11	11	33	29	0.617678	0.452369
15R177	XUTs	2	3	21	12	1.83659	0.155032
15R178	XUTs	2	3	17	18	1.92495	0.121615
15R185	XUTs	8	4	245	216	4.39364	2.38816e-18
15R187	XUTs	15	5	23	54	1.1003	0.182705
15R189	XUTs	4	1	80	75	4.08863	6.96957e-07
15R19	XUTs	58	28	141	129	0.793607	0.0395554
15R194	XUTs	14	5	84	84	2.28585	2.76484e-05
15R211	XUTs	8	11	21	16	0.0743238	0.954685
15R218	XUTs	1	1	4	4	1.12402	0.671346
15R219	XUTs	5	4	47	32	2.26054	0.00570903
15R220	XUTs	0	0	0	1	0.574838	NA
15R225	XUTs	0	0	1	0	0.56278	NA
15R229	XUTs	4	3	4	3	-0.86931	0.653165
15R235	XUTs	6	7	13	23	0.591283	0.608169
15R243	XUTs	0	0	3	3	3.15129	0.361002
15R247	XUTs	0	0	2	2	2.56633	NA
15R249	XUTs	113	106	594	574	1.54008	1.10931e-16
15R264	XUTs	2	0	4	4	1.17153	0.671031
15R265	XUTs	15	14	82	110	1.85412	9.33806e-05
15R284	XUTs	0	0	3	2	2.88623	0.444074
15R289	XUTs	1	0	9	10	3.38207	0.138296
15R29	XUTs	22	10	29	22	-0.182462	0.847926
15R293	XUTs	3	0	1	3	-0.392804	0.907515
15R294	XUTs	0	0	0	2	1.57666	NA
15R314	XUTs	16	17	59	53	0.884585	0.13056
15R327	XUTs	5	3	58	38	2.71524	0.000638979
15R33	XUTs	52	30	325	297	2.05838	4.22317e-14
15R34	XUTs	9	9	20	29	0.569865	0.549418
15R341	XUTs	0	0	2	4	3.15467	0.362436
15R344	XUTs	6	7	30	26	1.22673	0.163963
15R346	XUTs	1	0	31	20	4.79972	0.00959328
15R355	XUTs	0	1	6	2	2.0983	0.490331
15R366	XUTs	12	11	19	20	-0.112341	0.9192
15R372	XUTs	10	5	95	94	2.78976	4.27351e-07
15R380	XUTs	2	1	59	45	4.24469	7.01353e-05
15R385	XUTs	11	6	34	21	0.83058	0.360229
15R399	XUTs	0	1	54	32	5.54565	0.00137137
15R4	XUTs	62	57	132	169	0.465464	0.196176
15R403	XUTs	2	0	0	0	-3.24036	NA
15R427	XUTs	97	86	211	206	0.314668	0.300761
15R430	XUTs	18	12	96	82	1.70065	0.000371226
15R432	XUTs	55	54	107	76	-0.130722	0.794982
15R433	XUTs	13	11	59	44	1.22794	0.0496765
15R440	XUTs	0	1	3	2	1.41751	0.690201
15R442	XUTs	20	15	53	58	0.796453	0.175021
15R451	XUTs	0	0	4	2	3.14791	0.363983
15R461	XUTs	1	0	3	1	1.1381	0.773483
15R466	XUTs	4	4	30	22	1.82344	0.0619841
15R47	XUTs	5	4	38	44	2.31681	0.00369068
15R471	XUTs	0	0	0	0	NA	NA
15R475	XUTs	0	0	3	8	4.03038	0.134922
15R477	XUTs	4	7	17	10	0.401313	0.767179
15R485	XUTs	6	3	11	9	0.292941	0.855426
15R486	XUTs	2	2	7	6	0.823488	0.677789
15R489	XUTs	0	0	1	0	0.56278	NA
15R490	XUTs	0	1	0	0	-2.38209	NA
15R491	XUTs	0	0	0	0	NA	NA
15R51	XUTs	3	3	24	30	2.29589	0.0235202
15R54	XUTs	2	3	3	6	-0.0375752	0.987296
15R55	XUTs	1	1	1	0	-1.88004	0.651673
15R56	XUTs	2	3	4	6	0.113764	0.96443
15R65	XUTs	0	0	7	8	4.4739	0.0608671
15R66	XUTs	27	14	152	158	2.05565	6.6037e-08
15R7	XUTs	8	1	17	20	1.20308	0.311143
15R8	XUTs	65	47	168	202	0.857145	0.00574895
15R84	XUTs	9	6	263	206	4.09459	1.35554e-18
15R92	XUTs	0	0	0	0	NA	NA
15R99	XUTs	8	2	8	14	0.298352	0.851019
16F1	XUTs	0	1	2	2	1.09446	0.777029
16F100	XUTs	1	1	9	9	2.29488	0.233998
16F113	XUTs	3	3	8	5	0.236768	0.907136
16F117	XUTs	6	5	33	30	1.64539	0.0528229
16F13	XUTs	0	0	6	1	3.36635	0.310924
16F134	XUTs	0	1	15	19	4.20681	0.0339348
16F137	XUTs	4	4	18	15	1.16751	0.32859
16F139	XUTs	2	3	5	6	0.250715	0.909443
16F141	XUTs	1	0	1	1	0.145498	NA
16F145	XUTs	39	36	272	240	1.89647	2.72283e-11
16F148	XUTs	11	10	24	35	0.617993	0.471089
16F151	XUTs	10	10	66	59	1.76771	0.00234574
16F155	XUTs	7	3	3	1	-2.17429	0.20974
16F17	XUTs	2	7	53	45	2.55158	0.000900715
16F175	XUTs	6	10	29	27	0.91825	0.298789
16F176	XUTs	3	2	13	18	1.766	0.177368
16F178	XUTs	3	3	24	37	2.47284	0.0118165
16F180	XUTs	181	178	1002	961	1.57446	1.5213e-24
16F182	XUTs	25	37	196	194	1.76844	8.32669e-08
16F183	XUTs	2	3	133	142	4.90637	9.87624e-11
16F184	XUTs	1	0	10	11	3.52588	0.112476
16F19	XUTs	1	0	9	8	3.22112	0.170949
16F193	XUTs	0	0	0	0	NA	NA
16F197	XUTs	13	4	46	42	1.51957	0.0348207
16F206	XUTs	0	0	0	0	NA	NA
16F208	XUTs	0	0	12	10	5.02485	0.0183488
16F213	XUTs	49	39	81	60	-0.191269	0.71954
16F224	XUTs	1	2	3	5	0.523496	0.840068
16F226	XUTs	25	25	165	207	2.02075	5.67534e-09
16F227	XUTs	0	0	37	23	6.47086	0.000271277
16F229	XUTs	3	5	42	27	2.22246	0.0122184
16F233	XUTs	4	6	74	70	2.96812	6.58897e-06
16F236	XUTs	3	3	50	43	3.07897	0.00031819
16F238	XUTs	142	113	343	327	0.523262	0.0219127
16F24	XUTs	2	0	4	1	0.496419	0.889051
16F243	XUTs	15	12	188	204	2.98847	2.38062e-14
16F247	XUTs	173	153	437	456	0.580634	0.00332293
16F27	XUTs	8	10	199	182	3.52672	2.87087e-15
16F272	XUTs	3	2	6	3	-0.0201605	0.991999
16F274	XUTs	1	0	0	1	-0.845758	NA
16F28	XUTs	12	14	63	57	1.32649	0.0203215
16F280	XUTs	21	15	118	130	1.9157	3.20744e-06
16F292	XUTs	4	1	15	16	1.78072	0.179289
16F30	XUTs	55	44	164	155	0.817152	0.0119155
16F31	XUTs	10	6	110	113	2.93286	1.55749e-08
16F310	XUTs	10	8	21	20	0.316836	0.765209
16F311	XUTs	0	0	7	7	4.37369	0.0730052
16F324	XUTs	15	19	97	98	1.63911	0.000281777
16F332	XUTs	2	2	4	6	0.447155	0.845156
16F334	XUTs	1	0	5	5	2.45925	0.378179
16F339	XUTs	0	0	1	2	2.15465	NA
16F348	XUTs	4	2	11	17	1.36327	0.31149
16F35	XUTs	28	20	197	214	2.22914	2.54674e-11
16F353	XUTs	7	7	252	244	4.27284	6.03128e-20
16F356	XUTs	2	0	7	4	1.62346	0.500931
16F36	XUTs	0	0	1	1	1.56632	NA
16F363	XUTs	1	0	2	1	0.725907	0.874126
16F376	XUTs	59	56	122	134	0.279518	0.485471
16F377	XUTs	18	29	53	41	0.107442	0.891132
16F383	XUTs	12	12	56	46	1.21045	0.0522876
16F384	XUTs	0	0	1	1	1.56632	NA
16F47	XUTs	25	23	172	193	2.05342	2.60088e-09
16F65	XUTs	23	20	77	102	1.18604	0.0100509
16F73	XUTs	0	0	0	0	NA	NA
16F81	XUTs	2	2	2	4	-0.28929	0.913641
16F86	XUTs	0	0	0	0	NA	NA
16F88	XUTs	21	17	157	167	2.22063	3.02221e-09
16F95	XUTs	10	16	24	24	-0.0061451	0.994665
16F98	XUTs	6	4	22	20	1.20303	0.247762
16R132	XUTs	0	0	0	0	NA	NA
16R143	XUTs	8	6	129	120	3.28104	4.27942e-10
16R144	XUTs	0	0	1	4	2.89435	0.448642
16R15	XUTs	3	2	24	22	2.33246	0.0371768
16R165	XUTs	2	2	28	31	3.00863	0.00583141
16R166	XUTs	16	17	29	36	0.10026	0.911659
16R174	XUTs	2	1	56	49	4.25908	6.14945e-05
16R179	XUTs	0	0	3	1	2.56125	NA
16R18	XUTs	1	0	2	2	1.14251	0.771339
16R184	XUTs	26	15	138	138	1.88618	1.37224e-06
16R190	XUTs	5	2	33	32	2.35353	0.0108003
16R192	XUTs	11	6	57	57	1.88123	0.00260152
16R201	XUTs	2	1	15	9	2.13379	0.183819
16R204	XUTs	10	2	47	51	2.17962	0.00294227
16R21	XUTs	0	0	0	0	NA	NA
16R218	XUTs	2	1	2	3	-0.118968	0.972347
16R225	XUTs	5	3	46	35	2.47122	0.00289494
16R235	XUTs	9	8	12	22	0.129102	0.919044
16R239	XUTs	8	5	30	41	1.58476	0.0476001
16R25	XUTs	13	7	23	13	-0.0133375	0.989834
16R262	XUTs	0	1	4	7	2.56989	0.341158
16R270	XUTs	11	11	57	48	1.37805	0.0260395
16R274	XUTs	4	3	20	21	1.68046	0.125929
16R276	XUTs	1	0	0	0	-2.29141	NA
16R278	XUTs	1	11	12	11	0.00761773	0.996041
16R283	XUTs	12	15	40	54	0.919018	0.163487
16R288	XUTs	12	18	344	337	3.62592	3.72373e-26
16R29	XUTs	1	1	9	5	1.92925	0.364452
16R295	XUTs	5	5	28	23	1.47376	0.120944
16R299	XUTs	0	1	17	6	3.63325	0.0991317
16R30	XUTs	4	4	8	9	0.211263	0.904724
16R307	XUTs	2	2	13	11	1.70861	0.257359
16R310	XUTs	10	4	317	262	4.50106	2.87154e-22
16R314	XUTs	11	15	56	45	1.07295	0.0895753
16R343	XUTs	6	3	55	57	2.77192	0.00013852
16R346	XUTs	15	7	98	100	2.30732	3.42493e-06
16R348	XUTs	177	162	345	381	0.224653	0.363983
16R349	XUTs	1	0	6	3	2.30481	0.429731
16R351	XUTs	5	3	38	43	2.47308	0.00274357
16R354	XUTs	25	22	36	39	-0.198642	0.782093
16R359	XUTs	1	2	4	2	0.101823	0.973912
16R363	XUTs	3	0	10	15	2.22113	0.171637
16R364	XUTs	9	7	44	42	1.55549	0.026865
16R366	XUTs	3	6	116	76	3.53141	7.01526e-08
16R375	XUTs	46	37	163	160	1.08935	0.000774019
16R376	XUTs	6	8	24	22	0.832339	0.395365
16R399	XUTs	14	8	17	26	0.107831	0.923386
16R402	XUTs	1	0	1	4	1.46937	0.686489
16R404	XUTs	15	16	21	28	-0.217309	0.812944
16R410	XUTs	4	2	49	52	3.20651	0.000135749
16R419	XUTs	28	20	148	149	1.76056	1.47363e-06
16R422	XUTs	38	37	92	95	0.442215	0.329336
16R425	XUTs	0	0	0	0	NA	NA
16R54	XUTs	15	11	59	50	1.19805	0.0460349
16R59	XUTs	0	2	7	2	1.24133	0.641929
16R6	XUTs	5	2	15	24	1.62256	0.157936
16R66	XUTs	0	1	0	3	0.680111	0.886882
16R67	XUTs	5	5	7	4	-0.741871	0.641929
16R69	XUTs	30	15	64	62	0.627144	0.272138
16R8	XUTs	28	24	88	66	0.692557	0.164491
16R82	XUTs	3	10	42	39	1.74039	0.025104
16R9	XUTs	28	23	61	56	0.326297	0.586593
16R94	XUTs	2	2	30	24	2.87918	0.0103518
16R98	XUTs	1	1	1	3	0.12754	0.973582
1F1	XUTs	0	0	7	3	3.8842	0.16355
1F11	XUTs	1	0	21	10	4.08218	0.0460868
1F12	XUTs	13	11	40	41	0.882823	0.207622
1F14	XUTs	30	29	82	117	0.879946	0.0460868
1F15	XUTs	23	11	131	98	1.88956	2.1338e-05
1F23	XUTs	5	3	118	85	3.79405	1.36977e-08
1F25	XUTs	19	16	80	60	1.12657	0.0314903
1F3	XUTs	0	0	0	0	NA	NA
1F32	XUTs	16	9	219	178	3.12075	1.46495e-14
1F4	XUTs	31	36	106	90	0.667088	0.12717
1F60	XUTs	14	13	68	97	1.73891	0.000660295
1F72	XUTs	21	16	64	68	0.965615	0.0692094
1F75	XUTs	3	4	70	62	3.35919	7.49015e-06
1F89	XUTs	21	25	51	51	0.267079	0.684729
1F90	XUTs	107	108	399	301	0.824134	0.000539964
1F93	XUTs	10	10	23	19	0.192778	0.860975
1R101	XUTs	0	0	0	0	NA	NA
1R103	XUTs	15	8	21	16	-0.173819	0.877825
1R107	XUTs	1	0	3	1	1.1381	0.773483
1R108	XUTs	17	24	74	79	1.01512	0.0427216
1R16	XUTs	3	6	45	36	2.28249	0.00479002
1R18	XUTs	45	33	226	224	1.65921	1.46587e-08
1R2	XUTs	0	0	0	0	NA	NA
1R20	XUTs	1	0	1	3	1.1474	0.772441
1R35	XUTs	14	12	26	27	0.155199	0.874884
1R39	XUTs	1	0	2	2	1.14251	0.771339
1R40	XUTs	7	3	17	25	1.21494	0.253805
1R5	XUTs	2	1	5	2	0.360139	0.89919
1R55	XUTs	9	5	7	2	-1.49921	0.278416
1R79	XUTs	0	1	7	9	3.11334	0.192274
1R80	XUTs	1	5	6	0	-0.932964	0.69051
1R83	XUTs	8	5	13	15	0.2437	0.856169
1R85	XUTs	2	2	4	5	0.29427	0.904316
1R87	XUTs	7	2	15	19	1.06979	0.372921
1R90	XUTs	3	9	12	10	-0.0333088	0.984088
1R91	XUTs	20	18	22	39	-0.188684	0.827527
1R99	XUTs	2	3	3	2	-0.891297	0.698292
2F101	XUTs	2	6	24	23	1.65795	0.109278
2F106	XUTs	5	7	82	83	2.90244	1.58201e-06
2F116	XUTs	18	14	210	178	2.72789	4.22901e-13
2F118	XUTs	3	3	70	69	3.65981	2.79818e-06
2F123	XUTs	0	0	0	0	NA	NA
2F125	XUTs	7	8	51	36	1.65587	0.0207757
2F127	XUTs	1	2	15	19	2.61945	0.0625513
2F132	XUTs	7	6	76	78	2.69382	7.04607e-06
2F134	XUTs	4	4	100	76	3.58386	1.47569e-07
2F136	XUTs	11	4	84	95	2.71646	1.62767e-06
2F141	XUTs	19	8	36	44	0.713652	0.33567
2F143	XUTs	3	0	8	16	2.16501	0.194117
2F145	XUTs	67	55	139	123	0.230984	0.566039
2F146	XUTs	33	32	279	269	2.20059	1.72992e-14
2F149	XUTs	12	10	97	93	2.23808	5.95691e-06
2F150	XUTs	26	25	139	145	1.60251	1.13337e-05
2F154	XUTs	39	27	347	267	2.34795	6.29806e-16
2F158	XUTs	4	3	82	78	3.64277	4.50899e-07
2F161	XUTs	9	6	304	283	4.41882	4.21042e-23
2F166	XUTs	2	4	128	86	4.27585	7.08629e-09
2F169	XUTs	0	0	0	0	NA	NA
2F170	XUTs	0	0	0	0	NA	NA
2F177	XUTs	55	48	350	296	1.77512	2.36583e-12
2F190	XUTs	33	31	361	353	2.60554	5.29467e-22
2F197	XUTs	17	11	165	170	2.71222	1.54415e-11
2F2	XUTs	0	2	13	14	2.85464	0.0924505
2F206	XUTs	16	13	36	35	0.420625	0.58807
2F221	XUTs	7	8	40	28	1.29983	0.104904
2F225	XUTs	6	5	18	49	1.7394	0.0536644
2F240	XUTs	0	0	4	2	3.14791	0.363983
2F242	XUTs	68	73	668	576	2.26296	3.7925e-28
2F252	XUTs	0	1	0	0	-2.38209	NA
2F258	XUTs	2	1	3	0	-0.863218	0.791617
2F270	XUTs	2	1	7	13	1.87694	0.278416
2F274	XUTs	1	1	9	3	1.70455	0.455824
2F282	XUTs	78	62	159	157	0.304224	0.391145
2F291	XUTs	0	0	0	0	NA	NA
2F313	XUTs	2	1	20	13	2.5921	0.0700686
2F319	XUTs	0	0	3	2	2.88623	0.444074
2F32	XUTs	2	1	13	7	1.87119	0.280147
2F340	XUTs	40	32	194	181	1.50951	1.49096e-06
2F43	XUTs	5	3	35	29	2.13247	0.0176058
2F50	XUTs	11	8	106	84	2.45077	2.29236e-06
2F78	XUTs	12	10	27	27	0.42375	0.64002
2F87	XUTs	13	9	73	72	1.8519	0.000620334
2F89	XUTs	0	2	6	6	1.66896	0.465974
2F91	XUTs	12	6	40	41	1.30928	0.0700763
2F93	XUTs	1	0	16	9	3.77347	0.0775227
2R103	XUTs	0	1	11	10	3.50653	0.113648
2R109	XUTs	14	7	54	42	1.33087	0.0451233
2R11	XUTs	3	2	14	8	1.26797	0.410446
2R114	XUTs	11	7	54	67	1.88307	0.00191722
2R121	XUTs	4	2	8	8	0.556037	0.752091
2R127	XUTs	23	19	48	70	0.620621	0.294234
2R136	XUTs	12	8	22	34	0.621584	0.486002
2R142	XUTs	0	0	0	0	NA	NA
2R154	XUTs	6	5	22	16	0.915229	0.403554
2R166	XUTs	0	1	0	1	-0.919321	NA
2R170	XUTs	4	4	36	22	1.98018	0.0362291
2R172	XUTs	3	6	42	44	2.37078	0.00268108
2R178	XUTs	5	8	124	92	3.1727	1.79524e-08
2R183	XUTs	3	0	6	6	1.17263	0.598308
2R200	XUTs	1	0	6	3	2.30481	0.429731
2R226	XUTs	10	5	70	84	2.4963	2.05157e-05
2R246	XUTs	0	0	5	2	3.36933	0.29962
2R256	XUTs	167	150	537	605	0.975794	9.71331e-08
2R264	XUTs	0	0	16	7	5.08591	0.017014
2R267	XUTs	6	3	14	10	0.554759	0.694382
2R271	XUTs	0	0	3	1	2.56125	NA
2R272	XUTs	0	0	4	4	3.56633	0.239511
2R288	XUTs	4	3	21	23	1.78246	0.0937025
2R296	XUTs	0	0	0	0	NA	NA
2R299	XUTs	7	2	18	11	0.838493	0.524178
2R307	XUTs	17	14	46	45	0.682053	0.300761
2R31	XUTs	5	8	41	28	1.52034	0.0626386
2R314	XUTs	0	0	2	2	2.56633	NA
2R318	XUTs	4	0	36	38	3.35705	0.00137609
2R334	XUTs	5	2	92	75	3.7089	2.76425e-07
2R342	XUTs	66	65	248	272	1.11328	1.67233e-05
2R343	XUTs	29	36	72	94	0.470748	0.34926
2R344	XUTs	8	5	22	31	1.16383	0.204005
2R349	XUTs	3	1	13	7	1.46497	0.380056
2R39	XUTs	3	1	3	6	0.323983	0.897328
2R43	XUTs	6	9	19	16	0.333876	0.773483
2R48	XUTs	124	127	303	314	0.41984	0.089091
2R56	XUTs	3	7	11	11	0.238186	0.881128
2R58	XUTs	0	0	1	0	0.56278	NA
2R61	XUTs	0	0	2	3	2.89028	0.444067
2R63	XUTs	52	42	117	109	0.394508	0.33885
2R65	XUTs	130	98	205	229	0.0608787	0.869301
2R67	XUTs	0	0	2	1	2.14791	NA
2R74	XUTs	2	0	3	3	0.760935	0.807931
2R82	XUTs	4	2	20	16	1.72148	0.150918
2R85	XUTs	148	132	263	225	-0.0729362	0.826051
2R86	XUTs	0	0	1	1	1.56632	NA
2R91	XUTs	1	0	7	4	2.59365	0.339293
2R93	XUTs	20	13	54	54	0.844917	0.158334
3F108	XUTs	21	22	77	72	0.915059	0.0651864
3F11	XUTs	3	4	19	18	1.52018	0.185153
3F111	XUTs	1	0	5	5	2.45925	0.378179
3F12	XUTs	6	7	74	62	2.50882	5.71796e-05
3F130	XUTs	0	1	1	0	-0.928136	NA
3F132	XUTs	9	13	21	25	0.177639	0.868453
3F31	XUTs	3	4	13	15	1.11799	0.394107
3F33	XUTs	10	6	16	22	0.386485	0.727695
3F39	XUTs	0	0	0	1	0.574838	NA
3F45	XUTs	1	0	5	2	1.94292	0.543453
3F5	XUTs	2	2	3	3	-0.291983	0.912564
3F51	XUTs	4	14	41	27	1.00885	0.240529
3F58	XUTs	49	43	122	156	0.723439	0.0464027
3F6	XUTs	2	0	1	1	-0.811516	0.843299
3F61	XUTs	6	2	25	23	1.72912	0.0904409
3F65	XUTs	7	5	31	44	1.77655	0.0244963
3F70	XUTs	1	2	3	3	0.104879	0.973582
3F71	XUTs	47	43	136	175	0.915898	0.00727955
3F74	XUTs	12	13	30	34	0.477926	0.558485
3F78	XUTs	15	6	93	102	2.35505	3.73904e-06
3F82	XUTs	0	0	3	1	2.56125	NA
3F84	XUTs	0	2	0	1	-1.94298	0.651581
3F92	XUTs	2	2	8	3	0.578809	0.791441
3F94	XUTs	9	10	11	13	-0.54272	0.628118
3F99	XUTs	18	24	112	118	1.57116	0.000143776
3R100	XUTs	8	3	51	48	2.30967	0.00142929
3R106	XUTs	23	21	114	138	1.64487	3.21779e-05
3R119	XUTs	5	4	31	40	2.10964	0.0124488
3R124	XUTs	1	0	1	0	-0.854722	NA
3R130	XUTs	0	0	6	3	3.73288	0.197231
3R136	XUTs	13	14	46	49	0.937136	0.144536
3R144	XUTs	11	8	19	18	0.0934823	0.938944
3R147	XUTs	1	0	3	0	0.720813	0.882705
3R18	XUTs	0	1	8	5	2.80795	0.272231
3R28	XUTs	0	1	0	1	-0.919321	NA
3R41	XUTs	0	1	12	15	3.87263	0.063045
3R44	XUTs	47	43	170	157	0.986766	0.00209725
3R46	XUTs	34	33	107	111	0.826559	0.0390236
3R54	XUTs	1	2	22	25	3.08818	0.0148264
3R67	XUTs	10	13	55	72	1.58488	0.00595056
3R8	XUTs	0	0	9	13	5.02761	0.0184749
3R90	XUTs	0	0	2	0	1.5559	NA
4F115	XUTs	33	35	184	167	1.49	4.68871e-06
4F117	XUTs	2	2	2	5	-0.0659196	0.980884
4F127	XUTs	7	8	89	69	2.51854	1.36903e-05
4F132	XUTs	0	0	0	0	NA	NA
4F137	XUTs	5	4	30	34	1.95933	0.0249834
4F14	XUTs	3	4	16	19	1.44084	0.222314
4F142	XUTs	9	8	8	16	-0.373247	0.762516
4F148	XUTs	2	0	10	10	2.47784	0.191823
4F160	XUTs	36	33	78	94	0.444256	0.354152
4F161	XUTs	12	7	38	38	1.13631	0.124057
4F162	XUTs	19	25	32	42	-0.134314	0.868458
4F175	XUTs	48	33	282	251	1.84972	3.78646e-11
4F180	XUTs	0	0	4	5	3.73738	0.194117
4F181	XUTs	0	1	3	13	3.11683	0.203985
4F19	XUTs	0	0	3	0	2.14083	NA
4F193	XUTs	19	17	81	74	1.23226	0.0117136
4F194	XUTs	3	0	1	3	-0.392804	0.907515
4F204	XUTs	3	1	17	17	2.22891	0.0916959
4F206	XUTs	0	0	2	1	2.14791	NA
4F207	XUTs	1	0	1	0	-0.854722	NA
4F231	XUTs	1	3	3	6	0.268478	0.913515
4F238	XUTs	3	1	11	7	1.31431	0.448642
4F240	XUTs	1	2	10	6	1.52316	0.420221
4F241	XUTs	2	0	5	1	0.756716	0.815901
4F242	XUTs	13	8	83	85	2.13326	4.28682e-05
4F248	XUTs	29	26	104	94	0.97391	0.0208199
4F253	XUTs	188	165	1113	995	1.70445	8.2725e-29
4F255	XUTs	88	85	308	361	1.07625	4.18342e-06
4F267	XUTs	57	59	344	364	1.73306	4.82566e-13
4F272	XUTs	12	6	63	74	2.06583	0.000396754
4F273	XUTs	3	4	18	18	1.48081	0.201779
4F278	XUTs	13	7	16	23	0.105752	0.928322
4F28	XUTs	1	1	2	3	0.447198	0.893496
4F285	XUTs	2	4	18	11	1.38007	0.300261
4F288	XUTs	1	0	6	8	2.94412	0.239511
4F293	XUTs	6	12	36	18	0.686361	0.472273
4F297	XUTs	0	0	0	0	NA	NA
4F30	XUTs	39	31	68	76	0.170887	0.761979
4F300	XUTs	14	13	60	53	1.19033	0.0420267
4F303	XUTs	12	10	56	57	1.48888	0.0124984
4F306	XUTs	16	26	64	60	0.671752	0.244859
4F309	XUTs	2	2	7	6	0.823488	0.677789
4F316	XUTs	1	2	13	12	2.17228	0.164932
4F32	XUTs	3	1	5	5	0.472139	0.837983
4F321	XUTs	0	0	0	0	NA	NA
4F328	XUTs	3	6	35	22	1.77154	0.0600535
4F331	XUTs	0	0	1	0	0.56278	NA
4F339	XUTs	11	9	29	36	0.830105	0.300289
4F34	XUTs	1	0	3	1	1.1381	0.773483
4F340	XUTs	1	3	6	15	1.49855	0.363983
4F341	XUTs	28	24	45	55	0.0718648	0.921476
4F342	XUTs	4	1	9	12	1.22363	0.442094
4F348	XUTs	10	16	34	31	0.431942	0.606589
4F350	XUTs	0	0	6	14	4.89233	0.026972
4F352	XUTs	0	1	4	3	1.90817	0.544269
4F354	XUTs	0	2	17	12	2.95662	0.0759085
4F361	XUTs	1	1	4	5	1.29509	0.609009
4F376	XUTs	4	7	78	71	2.87738	6.36385e-06
4F377	XUTs	0	0	9	5	4.37079	0.0747853
4F381	XUTs	0	1	0	0	-2.38209	NA
4F384	XUTs	10	7	13	17	-0.0460215	0.973582
4F395	XUTs	24	24	60	39	0.165473	0.818399
4F416	XUTs	0	0	3	1	2.56125	NA
4F426	XUTs	0	1	8	7	3.01772	0.21585
4F43	XUTs	21	14	224	192	2.70155	9.09162e-14
4F435	XUTs	8	7	16	10	-0.0814548	0.956752
4F441	XUTs	1	5	6	9	0.409951	0.830943
4F446	XUTs	13	7	47	47	1.37018	0.0392159
4F447	XUTs	10	8	128	144	3.0463	1.93048e-10
4F448	XUTs	0	0	7	4	4.023	0.132713
4F449	XUTs	4	4	55	52	2.86654	0.000152831
4F467	XUTs	23	17	106	86	1.39287	0.00173703
4F473	XUTs	0	2	11	5	2.08467	0.31569
4F478	XUTs	12	6	170	163	3.34227	3.75095e-13
4F491	XUTs	3	0	25	26	3.23575	0.0104255
4F497	XUTs	6	3	43	24	2.0306	0.0221894
4F50	XUTs	45	38	136	109	0.688522	0.0730052
4F500	XUTs	60	58	99	99	-0.12939	0.77897
4F505	XUTs	1	2	31	35	3.57988	0.00205248
4F521	XUTs	0	0	0	0	NA	NA
4F522	XUTs	0	0	0	1	0.574838	NA
4F523	XUTs	0	0	0	0	NA	NA
4F524	XUTs	27	15	61	57	0.62899	0.281784
4F526	XUTs	25	24	267	269	2.57697	7.36644e-17
4F529	XUTs	30	23	64	53	0.272325	0.656802
4F531	XUTs	4	2	18	21	1.83836	0.11212
4F532	XUTs	52	53	201	184	0.997046	0.000784351
4F544	XUTs	6	8	16	9	-0.0513581	0.973582
4F546	XUTs	4	4	8	12	0.447113	0.773483
4F562	XUTs	6	3	49	34	2.33925	0.00377523
4F582	XUTs	4	0	6	2	0.180395	0.95158
4F592	XUTs	11	8	61	50	1.6763	0.00673743
4F597	XUTs	3	2	22	15	2.01752	0.0991317
4F605	XUTs	8	6	107	119	3.14222	5.18055e-09
4F609	XUTs	1	1	6	3	1.29093	0.612594
4F617	XUTs	10	7	14	18	0.0469425	0.973139
4F622	XUTs	12	7	53	63	1.7459	0.00426235
4F626	XUTs	0	0	4	2	3.14791	0.363983
4F63	XUTs	0	0	1	0	0.56278	NA
4F639	XUTs	12	11	29	26	0.383027	0.671016
4F642	XUTs	44	33	88	99	0.41196	0.369942
4F643	XUTs	0	1	22	16	4.36514	0.0245001
4F645	XUTs	9	11	91	65	2.08261	0.000151177
4F652	XUTs	0	0	5	3	3.5638	0.241038
4F655	XUTs	3	4	18	12	1.21512	0.341525
4F66	XUTs	0	0	3	5	3.56886	0.240014
4F661	XUTs	3	0	17	20	2.77849	0.0474196
4F669	XUTs	6	5	80	72	2.91566	3.95851e-06
4F675	XUTs	10	8	172	144	3.26106	2.31944e-12
4F685	XUTs	41	33	85	114	0.557883	0.209219
4F689	XUTs	3	7	14	12	0.479489	0.726758
4F692	XUTs	0	1	2	1	0.672162	0.88262
4F697	XUTs	2	3	144	161	5.05615	1.69524e-11
4F700	XUTs	31	30	97	121	0.962873	0.0181984
4F703	XUTs	0	1	0	0	-2.38209	NA
4F705	XUTs	1	2	38	34	3.70472	0.00114707
4F707	XUTs	5	8	17	15	0.409798	0.737005
4F709	XUTs	2	5	3	4	-0.903533	0.641929
4F711	XUTs	20	9	38	35	0.476123	0.543453
4F87	XUTs	6	1	15	11	1.05132	0.457525
4F90	XUTs	1	0	1	2	0.731936	0.872903
4F92	XUTs	2	2	1	1	-1.87753	0.495063
4R1	XUTs	2	0	12	3	2.06446	0.348491
4R100	XUTs	12	7	88	87	2.33678	9.48498e-06
4R104	XUTs	0	1	0	0	-2.38209	NA
4R120	XUTs	0	0	12	11	5.08946	0.0155972
4R125	XUTs	14	7	60	54	1.57857	0.00951463
4R15	XUTs	0	2	17	11	2.90479	0.0850975
4R155	XUTs	18	18	63	71	1.02045	0.0532997
4R167	XUTs	0	1	30	10	4.43489	0.0237303
4R172	XUTs	0	0	5	11	4.57014	0.0525228
4R177	XUTs	3	10	58	64	2.33662	0.000428768
4R182	XUTs	0	0	10	18	5.37659	0.00786771
4R190	XUTs	21	7	539	565	4.43543	1.02235e-40
4R195	XUTs	0	0	0	2	1.57666	NA
4R200	XUTs	0	0	1	3	2.57139	0.543453
4R203	XUTs	21	16	67	37	0.619156	0.344932
4R212	XUTs	27	29	377	386	2.89229	1.79222e-25
4R218	XUTs	31	12	144	138	1.85681	3.71563e-06
4R231	XUTs	2	1	12	8	1.87203	0.277239
4R234	XUTs	6	1	27	7	1.43447	0.287211
4R237	XUTs	9	8	32	27	0.921012	0.276513
4R246	XUTs	0	3	2	4	0.0671532	0.983973
4R252	XUTs	8	14	151	125	2.76503	1.50945e-09
4R253	XUTs	0	0	0	2	1.57666	NA
4R255	XUTs	3	5	55	38	2.65511	0.000895456
4R263	XUTs	151	138	304	321	0.23863	0.35961
4R265	XUTs	24	21	288	265	2.74591	2.36015e-18
4R27	XUTs	8	13	67	45	1.52633	0.015065
4R274	XUTs	12	8	167	171	3.20927	3.81618e-13
4R283	XUTs	1	1	4	7	1.58634	0.495956
4R298	XUTs	12	10	44	36	0.989748	0.163487
4R303	XUTs	91	75	1017	1042	2.76101	4.72596e-56
4R309	XUTs	0	0	0	1	0.574838	NA
4R313	XUTs	2	1	10	7	1.63852	0.372126
4R327	XUTs	1	2	4	4	0.521409	0.840068
4R329	XUTs	24	30	50	51	0.0197658	0.978989
4R333	XUTs	1	1	4	4	1.12402	0.671346
4R336	XUTs	25	24	23	37	-0.58194	0.389146
4R342	XUTs	3	1	34	19	2.86391	0.0130938
4R346	XUTs	10	4	28	26	1.09181	0.231694
4R364	XUTs	34	16	921	874	4.2984	1.69472e-63
4R365	XUTs	3	1	17	14	2.09547	0.127457
4R370	XUTs	21	12	86	59	1.27086	0.0169167
4R372	XUTs	68	58	139	126	0.199849	0.623545
4R374	XUTs	0	0	2	12	4.38105	0.0841142
4R393	XUTs	63	61	89	96	-0.298725	0.474344
4R40	XUTs	0	0	2	2	2.56633	NA
4R411	XUTs	11	13	29	23	0.232959	0.808814
4R418	XUTs	1	0	1	2	0.731936	0.872903
4R423	XUTs	18	18	72	82	1.22135	0.0131807
4R446	XUTs	25	14	47	45	0.377178	0.584924
4R45	XUTs	13	11	68	55	1.48428	0.00951433
4R456	XUTs	21	27	87	85	0.958405	0.0390824
4R458	XUTs	0	1	2	0	0.0720952	NA
4R461	XUTs	3	4	51	35	2.73826	0.00120551
4R468	XUTs	0	0	1	2	2.15465	NA
4R483	XUTs	31	15	65	76	0.759298	0.15785
4R486	XUTs	30	20	62	56	0.372842	0.532826
4R488	XUTs	0	0	2	3	2.89028	0.444067
4R491	XUTs	64	53	114	122	0.141184	0.750488
4R506	XUTs	50	38	84	93	0.139736	0.785493
4R514	XUTs	5	6	23	20	1.08581	0.287809
4R515	XUTs	15	22	66	62	0.904044	0.102407
4R521	XUTs	0	0	2	1	2.14791	NA
4R527	XUTs	46	45	147	136	0.760493	0.0289165
4R529	XUTs	6	2	35	28	2.11876	0.0206932
4R535	XUTs	0	1	17	12	3.97334	0.0528641
4R546	XUTs	0	2	12	6	2.25747	0.255323
4R548	XUTs	12	10	14	12	-0.631134	0.537915
4R549	XUTs	11	11	21	19	-0.0148285	0.988486
4R55	XUTs	52	29	856	845	3.52544	4.81511e-57
4R552	XUTs	12	11	20	18	-0.150484	0.89173
4R56	XUTs	6	2	109	57	3.50912	1.12767e-06
4R57	XUTs	120	138	307	381	0.533994	0.0339497
4R570	XUTs	1	0	2	5	1.95116	0.542366
4R585	XUTs	8	4	19	13	0.554721	0.650569
4R592	XUTs	0	0	12	12	5.1513	0.013395
4R597	XUTs	0	0	1	0	0.56278	NA
4R599	XUTs	1	2	11	6	1.61051	0.383038
4R608	XUTs	7	4	14	12	0.378585	0.779031
4R617	XUTs	4	4	39	36	2.35337	0.00525208
4R618	XUTs	0	1	1	0	-0.928136	NA
4R619	XUTs	6	10	26	25	0.783025	0.401531
4R68	XUTs	1	0	1	1	0.145498	NA
4R71	XUTs	3	2	18	17	1.93895	0.118951
4R81	XUTs	118	93	750	785	1.99266	2.34342e-29
4R9	XUTs	9	9	229	200	3.70003	2.90819e-17
4R92	XUTs	9	10	53	39	1.39586	0.0391388
4R94	XUTs	25	19	108	79	1.21639	0.00714553
5F101	XUTs	19	8	57	37	0.94301	0.169806
5F112	XUTs	4	10	28	21	0.907483	0.355109
5F115	XUTs	1	0	1	0	-0.854722	NA
5F117	XUTs	3	5	1	2	-2.30819	0.233227
5F12	XUTs	13	11	79	90	1.94421	0.000119036
5F122	XUTs	6	3	79	61	3.09162	7.64595e-06
5F125	XUTs	6	8	28	24	1.00928	0.270634
5F126	XUTs	5	2	24	18	1.72518	0.1183
5F128	XUTs	456	393	1186	1145	0.584414	1.73699e-05
5F129	XUTs	34	24	189	168	1.75275	1.62987e-07
5F136	XUTs	5	5	21	16	1.01009	0.363833
5F139	XUTs	71	60	381	349	1.60572	3.42725e-12
5F140	XUTs	0	0	0	0	NA	NA
5F151	XUTs	7	4	17	13	0.584149	0.641929
5F166	XUTs	2	2	62	51	3.94528	2.73137e-05
5F171	XUTs	8	6	62	58	2.22881	0.000437832
5F174	XUTs	1	0	7	13	3.45845	0.126931
5F180	XUTs	7	4	43	60	2.36258	0.00099391
5F185	XUTs	0	0	1	0	0.56278	NA
5F191	XUTs	37	31	115	118	0.904942	0.0184847
5F195	XUTs	8	9	100	94	2.63554	5.42444e-07
5F207	XUTs	5	5	51	43	2.35675	0.0015336
5F21	XUTs	8	16	25	12	-0.277465	0.799735
5F213	XUTs	24	28	207	169	1.97428	7.60175e-09
5F217	XUTs	9	12	108	102	2.44198	5.9663e-07
5F218	XUTs	5	3	6	12	0.310152	0.856179
5F222	XUTs	0	0	24	12	5.73286	0.00294101
5F223	XUTs	1	1	5	13	2.2991	0.241534
5F233	XUTs	0	0	5	3	3.5638	0.241038
5F238	XUTs	6	11	36	27	0.997432	0.235122
5F239	XUTs	32	19	299	233	2.51552	3.47409e-15
5F24	XUTs	7	14	43	29	0.881585	0.267366
5F248	XUTs	3	2	11	9	1.1322	0.474925
5F255	XUTs	69	60	231	255	1.04122	8.43303e-05
5F256	XUTs	0	0	0	0	NA	NA
5F33	XUTs	0	0	0	0	NA	NA
5F52	XUTs	6	6	18	17	0.667638	0.554796
5F55	XUTs	2	1	3	5	0.55813	0.829917
5F62	XUTs	6	8	16	12	0.11378	0.935423
5F67	XUTs	4	9	52	51	2.09653	0.00239814
5F68	XUTs	4	7	16	6	0.102663	0.952894
5F7	XUTs	16	13	75	58	1.32478	0.0146298
5F75	XUTs	10	14	46	53	1.16094	0.0696349
5F90	XUTs	0	0	0	0	NA	NA
5F98	XUTs	7	2	61	47	2.725	0.00026911
5R11	XUTs	58	56	106	135	0.205068	0.641389
5R111	XUTs	9	15	20	24	-0.0166431	0.987446
5R115	XUTs	5	8	35	33	1.50105	0.0639398
5R12	XUTs	10	8	14	21	0.0906421	0.94455
5R126	XUTs	40	18	77	76	0.544743	0.303852
5R129	XUTs	41	43	139	116	0.723209	0.0536755
5R135	XUTs	1	0	0	1	-0.845758	NA
5R139	XUTs	1	0	3	0	0.720813	0.882705
5R142	XUTs	2	0	7	1	1.16748	0.684219
5R144	XUTs	40	31	287	238	2.015	3.65208e-12
5R148	XUTs	6	5	19	21	0.991116	0.34873
5R151	XUTs	4	3	234	242	5.21535	5.56998e-17
5R165	XUTs	0	1	2	4	1.68795	0.616097
5R166	XUTs	7	3	38	31	1.92533	0.0224134
5R168	XUTs	11	7	33	51	1.35869	0.0601931
5R182	XUTs	8	7	13	16	0.0789519	0.956752
5R192	XUTs	4	2	14	11	1.197	0.398177
5R194	XUTs	63	46	148	187	0.753045	0.0229074
5R205	XUTs	0	0	1	2	2.15465	NA
5R207	XUTs	0	0	0	0	NA	NA
5R211	XUTs	0	1	5	2	1.90487	0.548298
5R216	XUTs	0	2	9	8	2.17757	0.277586
5R225	XUTs	1	0	34	29	5.10519	0.00431664
5R227	XUTs	0	0	8	6	4.37225	0.0734523
5R230	XUTs	3	2	9	12	1.20475	0.440442
5R232	XUTs	6	6	39	33	1.70854	0.0312333
5R239	XUTs	0	0	3	2	2.88623	0.444074
5R245	XUTs	0	0	0	0	NA	NA
5R247	XUTs	2	1	31	22	3.27404	0.00807104
5R26	XUTs	12	10	24	21	0.160188	0.88262
5R36	XUTs	9	12	31	33	0.724134	0.372921
5R40	XUTs	4	4	11	9	0.44448	0.773483
5R48	XUTs	0	1	4	0	1.07951	0.798554
5R72	XUTs	0	1	22	13	4.24484	0.0320384
5R74	XUTs	6	11	101	84	2.55869	2.26288e-06
5R75	XUTs	25	21	28	40	-0.306382	0.673491
5R76	XUTs	38	26	225	279	2.11039	4.7652e-12
5R81	XUTs	8	9	24	29	0.76192	0.399021
5R90m	XUTs	16	7	119	129	2.56847	3.14743e-08
5R93	XUTs	59	64	187	162	0.624712	0.0515905
5R97	XUTs	8	12	59	49	1.54757	0.0134798
6F104	XUTs	7	5	15	13	0.354201	0.783962
6F106	XUTs	0	0	11	21	5.56951	0.00465865
6F108	XUTs	0	1	4	6	2.43063	0.382795
6F13	XUTs	0	0	0	0	NA	NA
6F15	XUTs	0	0	0	0	NA	NA
6F22	XUTs	88	75	201	216	0.483251	0.098103
6F28	XUTs	0	0	0	0	NA	NA
6F34	XUTs	4	6	11	8	0.0363047	0.983973
6F39	XUTs	5	0	26	20	2.36015	0.0449646
6F46	XUTs	6	4	19	10	0.667256	0.607743
6F52	XUTs	5	3	11	9	0.457845	0.769143
6F62	XUTs	7	2	26	31	1.81054	0.0540115
6F83	XUTs	5	4	17	13	0.864933	0.487101
6F87	XUTs	1	1	5	12	2.21625	0.26795
6F9	XUTs	0	0	0	0	NA	NA
6R1	XUTs	0	0	0	0	NA	NA
6R108	XUTs	3	0	8	3	1.04549	0.657092
6R114	XUTs	0	0	1	0	0.56278	NA
6R115	XUTs	87	59	380	423	1.59332	2.70844e-12
6R13	XUTs	0	0	0	0	NA	NA
6R17	XUTs	0	0	0	0	NA	NA
6R28	XUTs	2	0	15	7	2.61127	0.16138
6R35	XUTs	0	0	0	0	NA	NA
6R39	XUTs	26	20	74	64	0.714646	0.170691
6R50	XUTs	45	24	117	88	0.71036	0.111492
6R53	XUTs	1	1	17	21	3.37472	0.0271075
6R65	XUTs	15	10	55	45	1.13244	0.0728647
6R66	XUTs	5	2	63	76	3.44697	4.11109e-06
6R7	XUTs	0	1	0	3	0.680111	0.886882
6R81	XUTs	2	2	185	134	5.44239	5.56448e-11
6R82	XUTs	4	0	32	25	2.98324	0.00867756
6R86	XUTs	0	0	0	1	0.574838	NA
6R94	XUTs	1	0	1	3	1.1474	0.772441
7F110	XUTs	0	0	4	2	3.14791	0.363983
7F114	XUTs	1	0	4	1	1.45799	0.689248
7F126	XUTs	4	7	25	20	1.14243	0.258831
7F130	XUTs	13	5	54	48	1.64521	0.0127249
7F133	XUTs	25	11	330	320	3.30953	1.22832e-23
7F144	XUTs	3	1	9	4	0.845942	0.67796
7F158	XUTs	37	44	146	108	0.765697	0.0495837
7F16	XUTs	10	10	25	16	0.156832	0.891107
7F163	XUTs	4	0	10	5	1.07924	0.589086
7F17	XUTs	3	0	5	12	1.67463	0.388356
7F175	XUTs	1	1	5	12	2.21625	0.26795
7F177	XUTs	0	1	2	2	1.09446	0.777029
7F185	XUTs	2	3	14	5	1.03545	0.538895
7F206	XUTs	6	2	22	25	1.69996	0.0994354
7F209	XUTs	1	0	8	5	2.83404	0.269686
7F211	XUTs	16	10	341	382	3.92813	4.55604e-28
7F213	XUTs	24	13	71	107	1.40673	0.00407101
7F236	XUTs	0	0	3	2	2.88623	0.444074
7F261	XUTs	98	66	366	335	1.22924	1.11323e-07
7F267	XUTs	8	11	99	106	2.55204	4.50899e-07
7F271	XUTs	4	2	9	8	0.642747	0.704361
7F276	XUTs	15	6	41	52	1.29242	0.0589065
7F281	XUTs	12	7	128	104	2.74181	2.82668e-08
7F283	XUTs	13	16	61	52	1.0802	0.0662791
7F291	XUTs	0	0	12	4	4.56122	0.055124
7F296	XUTs	8	9	11	11	-0.508783	0.669813
7F31	XUTs	23	21	137	150	1.83208	1.09495e-06
7F311	XUTs	13	12	47	50	1.08208	0.0879762
7F323	XUTs	23	19	65	59	0.689923	0.212227
7F324	XUTs	26	32	88	98	0.799598	0.0734523
7F333	XUTs	1	0	18	13	4.08388	0.0442279
7F339	XUTs	0	0	0	0	NA	NA
7F347	XUTs	6	5	12	11	0.19208	0.89919
7F353	XUTs	14	17	33	22	-0.0574468	0.956752
7F358	XUTs	1	0	3	2	1.46144	0.684219
7F36	XUTs	62	37	107	102	0.216095	0.647687
7F362	XUTs	0	0	1	0	0.56278	NA
7F368	XUTs	3	0	11	13	2.16146	0.188631
7F375	XUTs	12	11	38	33	0.751349	0.322423
7F380	XUTs	17	11	28	21	-0.0580972	0.958818
7F384	XUTs	31	16	91	98	1.14777	0.0108181
7F391	XUTs	1	0	3	2	1.46144	0.684219
7F393	XUTs	1	0	2	8	2.46577	0.387879
7F400	XUTs	3	1	11	8	1.39242	0.411109
7F402	XUTs	4	2	16	12	1.3598	0.310763
7F406	XUTs	1	0	3	2	1.46144	0.684219
7F409	XUTs	4	3	3	6	-0.503096	0.797814
7F413	XUTs	0	0	0	0	NA	NA
7F414	XUTs	5	6	61	47	2.41623	0.000549582
7F426	XUTs	13	19	18	22	-0.566451	0.501961
7F437	XUTs	70	62	169	146	0.380756	0.275999
7F439	XUTs	72	53	279	293	1.32562	1.44988e-07
7F44	XUTs	39	22	34	18	-1.09085	0.0714073
7F447	XUTs	20	22	141	139	1.85935	1.15436e-06
7F455	XUTs	6	2	36	46	2.4994	0.00275639
7F460	XUTs	8	6	129	110	3.22153	1.37634e-09
7F466	XUTs	0	0	1	0	0.56278	NA
7F469	XUTs	30	27	148	142	1.4732	3.2723e-05
7F470	XUTs	3	2	43	32	3.03571	0.00159436
7F471	XUTs	1	0	19	32	4.80452	0.00964176
7F475	XUTs	28	30	167	175	1.68276	6.17888e-07
7F478	XUTs	0	3	8	4	1.07113	0.63346
7F479	XUTs	1	3	4	0	-0.919331	0.743505
7F48	XUTs	0	0	6	5	4.02485	0.130956
7F480	XUTs	6	1	9	10	0.603755	0.713799
7F59	XUTs	5	6	12	12	0.243802	0.868458
7F64	XUTs	2	0	2	4	0.764427	0.808082
7F65	XUTs	0	1	6	5	2.56656	0.340136
7F7	XUTs	0	0	1	0	0.56278	NA
7F71	XUTs	1	1	20	10	3.02904	0.0667008
7F76	XUTs	16	14	45	32	0.485346	0.515922
7F91	XUTs	0	0	0	0	NA	NA
7F95	XUTs	1	7	12	12	0.667269	0.656198
7R104	XUTs	0	0	3	2	2.88623	0.444074
7R105	XUTs	6	10	88	60	2.32345	9.09625e-05
7R114	XUTs	0	2	30	18	3.69031	0.0113024
7R116	XUTs	0	1	9	5	2.91501	0.243863
7R12	XUTs	1	3	19	22	2.46812	0.0456999
7R123	XUTs	11	8	163	155	3.19391	2.03648e-12
7R124	XUTs	9	9	9	11	-0.724462	0.524178
7R129	XUTs	13	1	29	30	1.26875	0.483948
7R131	XUTs	0	0	1	1	1.56632	NA
7R133	XUTs	30	19	78	58	0.60718	0.266742
7R135	XUTs	7	6	23	32	1.20993	0.176595
7R144	XUTs	37	28	135	125	1.13017	0.00201797
7R159	XUTs	0	0	8	8	4.56634	0.0506435
7R165	XUTs	6	7	25	14	0.701797	0.521686
7R168	XUTs	3	1	23	16	2.42427	0.0551572
7R172	XUTs	8	7	48	44	1.74328	0.011457
7R173	XUTs	36	36	48	49	-0.44715	0.407133
7R174	XUTs	3	4	11	4	0.210385	0.912893
7R181	XUTs	1	5	36	30	2.56313	0.00783084
7R184	XUTs	0	1	2	1	0.672162	0.88262
7R187	XUTs	5	7	79	71	2.76397	8.06215e-06
7R19	XUTs	5	7	32	24	1.33762	0.136307
7R2	XUTs	1	2	0	0	-3.93061	0.266211
7R20	XUTs	15	17	104	90	1.7209	0.000166412
7R21	XUTs	0	1	14	13	3.8712	0.0629542
7R213	XUTs	21	12	38	49	0.538152	0.444074
7R228	XUTs	16	6	48	49	1.28624	0.0530617
7R231	XUTs	0	1	7	2	2.26891	0.441621
7R238	XUTs	21	22	84	72	0.980918	0.0437269
7R243	XUTs	107	70	849	860	2.40479	3.86902e-39
7R245	XUTs	62	36	309	295	1.75978	3.40634e-11
7R25	XUTs	1	3	11	15	1.80711	0.220846
7R255	XUTs	2	1	11	6	1.63752	0.375342
7R261	XUTs	4	1	50	46	3.4006	0.000174357
7R262	XUTs	22	20	155	171	2.08321	1.26911e-08
7R264	XUTs	37	43	135	121	0.796882	0.0329444
7R269	XUTs	15	11	81	86	1.81402	0.000271897
7R275	XUTs	6	3	53	50	2.65096	0.000371226
7R276	XUTs	1	0	2	0	0.137612	NA
7R295	XUTs	2	0	12	6	2.3252	0.244859
7R298	XUTs	0	1	12	6	3.27949	0.158872
7R303	XUTs	0	0	0	1	0.574838	NA
7R305	XUTs	30	29	90	79	0.641948	0.169233
7R308	XUTs	0	3	6	7	1.19273	0.57444
7R315	XUTs	33	30	366	391	2.71364	6.99961e-24
7R319	XUTs	7	5	4	4	-1.45137	0.314336
7R322	XUTs	19	5	75	84	1.87818	0.000646137
7R326	XUTs	1	0	14	9	3.65414	0.0927954
7R328	XUTs	2	3	10	7	0.877932	0.611786
7R336	XUTs	1	1	8	5	1.8228	0.405105
7R340	XUTs	25	22	81	88	0.973531	0.0348993
7R348	XUTs	0	0	6	3	3.73288	0.197231
7R35	XUTs	0	0	7	3	3.8842	0.16355
7R360	XUTs	7	2	32	24	1.78305	0.0610785
7R365	XUTs	45	38	395	384	2.35798	2.3787e-21
7R374	XUTs	21	18	59	65	0.796757	0.148163
7R383	XUTs	1	0	1	2	0.731936	0.872903
7R384	XUTs	2	1	8	13	1.94643	0.249676
7R404	XUTs	33	29	194	181	1.72314	8.74654e-08
7R411	XUTs	5	3	13	19	1.13736	0.353123
7R418	XUTs	133	105	247	223	0.111423	0.732163
7R42	XUTs	0	0	12	6	4.73288	0.0373254
7R424	XUTs	0	0	0	0	NA	NA
7R426	XUTs	7	3	11	7	-0.00720679	0.996057
7R43	XUTs	0	0	3	11	4.37953	0.0791323
7R433	XUTs	27	16	59	52	0.505092	0.40884
7R435	XUTs	0	0	3	1	2.56125	NA
7R45	XUTs	1	1	33	35	4.214	0.00165164
7R459	XUTs	52	30	89	82	0.199145	0.703711
7R460	XUTs	0	0	4	0	2.55583	NA
7R469	XUTs	22	14	48	40	0.424349	0.543453
7R483	XUTs	6	5	16	23	0.95581	0.376641
7R5	XUTs	10	12	16	18	-0.253981	0.81533
7R51	XUTs	1	2	8	8	1.52573	0.416268
7R63	XUTs	21	16	320	311	3.22067	2.22251e-23
7R7	XUTs	0	0	4	2	3.14791	0.363983
7R77	XUTs	16	17	71	55	1.05391	0.0569361
7R88	XUTs	20	10	59	58	1.10358	0.0586021
7R9	XUTs	0	0	0	0	NA	NA
7R93	XUTs	4	14	41	42	1.3013	0.0862616
7R97	XUTs	0	0	1	1	1.56632	NA
8F102	XUTs	2	2	5	11	1.12737	0.537939
8F104	XUTs	24	30	153	136	1.5384	2.56929e-05
8F113	XUTs	0	0	6	8	4.37513	0.0732309
8F117	XUTs	0	0	8	7	4.47255	0.0609744
8F123	XUTs	1	0	1	3	1.1474	0.772441
8F13	XUTs	0	0	8	8	4.56634	0.0506435
8F130	XUTs	7	8	10	19	0.0729487	0.962179
8F131	XUTs	59	52	560	542	2.43822	9.73947e-30
8F134	XUTs	4	2	10	14	1.141	0.429957
8F135	XUTs	16	14	69	67	1.30744	0.0132884
8F144	XUTs	0	0	1	2	2.15465	NA
8F158	XUTs	16	21	114	131	1.8466	8.5864e-06
8F159	XUTs	5	3	29	41	2.26418	0.00982525
8F162	XUTs	0	0	2	2	2.56633	NA
8F165	XUTs	0	0	4	3	3.37224	0.294748
8F168	XUTs	9	8	52	61	1.86021	0.00287018
8F18	XUTs	0	1	12	18	4.02614	0.0485648
8F190	XUTs	0	0	0	0	NA	NA
8F193	XUTs	15	6	22	16	0.00322379	0.99694
8F2	XUTs	86	66	185	163	0.325296	0.336564
8F204	XUTs	15	19	27	35	-0.0161658	0.986753
8F212	XUTs	4	5	27	26	1.67777	0.075739
8F22	XUTs	1	3	17	16	2.15185	0.107067
8F226	XUTs	1	4	26	29	2.56717	0.0155909
8F229	XUTs	1	6	58	75	3.35864	1.0998e-05
8F237	XUTs	42	50	139	148	0.760148	0.0314366
8F239	XUTs	1	0	3	4	1.94819	0.539794
8F245	XUTs	0	0	1	1	1.56632	NA
8F246	XUTs	4	6	9	10	0.0381754	0.982768
8F32	XUTs	0	0	5	0	2.87773	0.490785
8F36	XUTs	3	1	74	58	4.17623	5.74137e-06
8F44	XUTs	35	27	493	465	3.07823	7.7456e-33
8F48	XUTs	7	6	36	19	1.20547	0.189601
8F65	XUTs	11	7	24	16	0.286009	0.794982
8F67	XUTs	19	14	81	82	1.43516	0.00296367
8F72	XUTs	15	18	53	41	0.627534	0.343453
8F76	XUTs	0	0	15	14	5.42397	0.00656774
8F77	XUTs	18	4	189	160	3.15494	0.000241257
8F87	XUTs	16	21	77	60	1.00415	0.0604054
8F92	XUTs	44	28	108	97	0.644674	0.131215
8R10	XUTs	48	23	62	84	0.186729	0.758324
8R111	XUTs	0	0	1	2	2.15465	NA
8R113	XUTs	7	3	67	56	2.75609	6.92883e-05
8R115	XUTs	16	11	111	88	2.01216	2.03914e-05
8R117	XUTs	9	9	22	33	0.736785	0.410706
8R118	XUTs	6	11	44	62	1.75393	0.00800332
8R125	XUTs	7	4	17	21	0.926626	0.399021
8R129	XUTs	0	0	0	0	NA	NA
8R130	XUTs	6	1	146	137	4.47197	1.53691e-11
8R135	XUTs	0	2	31	29	4.01816	0.00343046
8R137	XUTs	2	3	18	23	2.15479	0.0657231
8R142	XUTs	1	0	3	4	1.94819	0.539794
8R157	XUTs	13	20	124	110	1.94124	7.37453e-06
8R16	XUTs	0	0	2	1	2.14791	NA
8R165	XUTs	1	2	6	5	0.981861	0.65639
8R171m	XUTs	7	8	38	35	1.40376	0.0662983
8R172	XUTs	16	1	69	55	2.06541	0.263758
8R174	XUTs	42	28	85	100	0.537374	0.241069
8R189	XUTs	23	34	140	145	1.43665	0.000107721
8R190	XUTs	39	50	229	216	1.4393	1.02626e-06
8R193	XUTs	26	13	136	164	2.0821	1.31514e-07
8R199	XUTs	30	31	48	44	-0.285684	0.643033
8R214	XUTs	3	5	27	25	1.81496	0.0627134
8R216	XUTs	3	2	7	12	1.06175	0.517543
8R217	XUTs	5	10	79	90	2.60943	5.12106e-06
8R22	XUTs	4	4	13	16	0.982745	0.442094
8R221	XUTs	7	5	33	40	1.73677	0.0282445
8R223	XUTs	32	13	42	63	0.373403	0.591705
8R227	XUTs	5	0	74	63	3.91794	4.17047e-06
8R234	XUTs	1	3	3	4	-0.097192	0.973106
8R241	XUTs	1	0	20	12	4.12875	0.0411498
8R242	XUTs	1	7	29	37	2.14173	0.0208199
8R246	XUTs	0	0	6	10	4.56887	0.0513451
8R247	XUTs	30	28	83	75	0.570575	0.241576
8R253	XUTs	1	3	9	9	1.27171	0.458992
8R26	XUTs	26	27	78	68	0.583619	0.25464
8R47	XUTs	15	16	20	14	-0.747515	0.374192
8R64	XUTs	14	7	58	64	1.67711	0.00456355
8R68	XUTs	15	7	32	43	0.913194	0.229935
8R76	XUTs	1	4	35	35	2.91733	0.0029627
8R87	XUTs	3	1	13	23	2.31418	0.0780503
8R98	XUTs	12	16	35	45	0.631431	0.386563
9F10	XUTs	40	25	77	68	0.293545	0.594201
9F104	XUTs	1	1	2	5	0.935069	0.74056
9F108	XUTs	0	0	1	0	0.56278	NA
9F111	XUTs	17	19	236	218	2.77968	1.91884e-15
9F113	XUTs	44	25	68	54	-0.0387721	0.958727
9F117	XUTs	1	1	5	8	1.82718	0.403767
9F120	XUTs	12	11	34	44	0.888855	0.219976
9F122	XUTs	1	0	18	17	4.25971	0.03082
9F129	XUTs	3	1	75	95	4.54262	3.18982e-07
9F13	XUTs	6	4	24	21	1.30224	0.194809
9F136	XUTs	26	17	30	37	-0.223546	0.771339
9F138	XUTs	57	48	224	221	1.2113	1.28354e-05
9F139	XUTs	37	33	192	185	1.55554	7.19856e-07
9F143	XUTs	8	5	29	23	1.13365	0.218876
9F152	XUTs	5	4	16	8	0.541397	0.703711
9F159	XUTs	0	2	27	25	3.80981	0.00719769
9F171	XUTs	4	2	2	4	-0.853407	0.687349
9F176	XUTs	15	15	32	37	0.325547	0.684179
9F185	XUTs	0	0	0	0	NA	NA
9F189	XUTs	52	55	199	167	0.895218	0.00377523
9F2	XUTs	2526	2336	4314	3480	-0.196087	0.176743
9F202	XUTs	5	5	9	11	0.124081	0.941089
9F207	XUTs	0	0	2	1	2.14791	NA
9F210	XUTs	0	0	2	0	1.5559	NA
9F213	XUTs	34	28	77	68	0.35383	0.503928
9F220	XUTs	2	0	27	21	3.72691	0.0105954
9F25	XUTs	1	0	20	22	4.5228	0.0176111
9F29	XUTs	1	1	2	1	-0.294636	0.939415
9F31	XUTs	1	0	0	0	-2.29141	NA
9F32	XUTs	3	2	16	16	1.81014	0.159784
9F38	XUTs	11	11	202	235	3.43842	5.20646e-17
9F4	XUTs	414	377	804	781	0.1281	0.500773
9F43	XUTs	0	0	2	1	2.14791	NA
9F55	XUTs	8	2	57	59	2.67912	0.000167206
9F57	XUTs	1	1	5	12	2.21625	0.26795
9F63	XUTs	0	0	0	0	NA	NA
9F71	XUTs	0	2	25	12	3.30918	0.0351982
9F75	XUTs	1	0	1	1	0.145498	NA
9F9	XUTs	13	13	34	38	0.593451	0.435364
9F90	XUTs	0	0	0	0	NA	NA
9F91	XUTs	2	1	1	6	0.370815	0.898809
9F93	XUTs	0	0	8	12	4.89029	0.0256596
9F96	XUTs	16	14	76	62	1.32768	0.0121243
9F98	XUTs	5	6	96	77	3.09737	5.06053e-07
9R104	XUTs	0	0	2	0	1.5559	NA
9R117	XUTs	2	4	39	48	2.9761	0.000668378
9R118	XUTs	0	0	4	2	3.14791	0.363983
9R124	XUTs	1	2	7	12	1.77709	0.311518
9R141	XUTs	0	0	10	12	5.02669	0.0182975
9R145	XUTs	2	2	43	76	4.02364	2.28248e-05
9R14m	XUTs	0	2	8	4	1.66495	0.471805
9R14m2	XUTs	3	1	3	3	-0.262114	0.922871
9R150	XUTs	0	0	3	5	3.56886	0.240014
9R167	XUTs	2	2	231	184	5.82254	7.25238e-13
9R170	XUTs	0	0	6	6	4.1513	0.107011
9R175	XUTs	8	3	27	24	1.35704	0.155874
9R183	XUTs	1	0	14	5	3.37732	0.145935
9R194	XUTs	1	6	11	6	0.359557	0.844799
9R2	XUTs	0	0	4	4	3.56633	0.239511
9R22	XUTs	2	1	5	1	0.136544	0.968015
9R35	XUTs	11	5	26	37	1.1211	0.182637
9R38	XUTs	9	5	16	17	0.376345	0.753142
9R40	XUTs	2	0	3	3	0.760935	0.807931
9R45	XUTs	2	6	34	15	1.71299	0.107145
9R49	XUTs	3	0	3	5	0.596485	0.827554
9R51	XUTs	5	4	115	78	3.54858	4.86122e-08
9R53	XUTs	32	18	113	140	1.47737	0.000203379
9R55	XUTs	39	41	38	23	-1.27249	0.0104446
9R56	XUTs	8	5	27	16	0.858845	0.408348
9R63	XUTs	56	61	155	135	0.42946	0.239927
9R77	XUTs	24	24	51	66	0.409778	0.494044
9R84	XUTs	7	11	9	8	-0.974682	0.391756
CUT001	CUTs	23	13	134	99	1.84392	1.28138e-05
CUT002	CUTs	13	11	65	93	1.8635	0.000286168
CUT003	CUTs	15	10	130	112	2.42085	4.59865e-08
CUT004	CUTs	49	53	150	157	0.726308	0.0248916
CUT005	CUTs	3	5	58	45	2.81918	0.000171186
CUT006	CUTs	1	0	4	8	2.73963	0.279062
CUT007	CUTs	1	2	13	16	2.40436	0.0914242
CUT008	CUTs	0	2	24	28	3.82674	0.00535084
CUT009	CUTs	25	19	70	81	0.925385	0.0509703
CUT010	CUTs	21	11	91	69	1.47408	0.00256455
CUT011	CUTs	17	13	136	106	2.15543	4.32956e-07
CUT012	CUTs	6	6	145	153	3.77566	8.23268e-13
CUT013	CUTs	2	2	54	39	3.6787	0.000121846
CUT014	CUTs	32	23	79	55	0.430826	0.42577
CUT015	CUTs	3	3	148	167	4.85658	1.45794e-12
CUT016	CUTs	4	4	100	77	3.60736	6.74588e-08
CUT017	CUTs	27	12	301	317	3.13745	4.09057e-22
CUT018	CUTs	2	2	15	18	2.18539	0.0860978
CUT019	CUTs	31	32	277	263	2.2385	6.54687e-15
CUT020	CUTs	4	3	74	70	3.50603	1.21262e-06
CUT021	CUTs	24	14	366	280	3.23386	8.13026e-23
CUT022	CUTs	4	1	60	59	3.72416	1.05695e-05
CUT023	CUTs	6	6	213	185	4.19232	1.38726e-16
CUT024	CUTs	10	13	228	243	3.49449	6.64721e-19
CUT025	CUTs	56	49	393	340	1.94493	6.07451e-16
CUT026	CUTs	20	12	215	188	2.8016	3.31846e-14
CUT027	CUTs	17	10	142	154	2.60316	3.06522e-10
CUT028	CUTs	11	5	177	181	3.63217	6.66316e-15
CUT029	CUTs	12	7	430	360	4.5219	2.80371e-30
CUT030	CUTs	41	54	508	447	2.46289	6.08256e-25
CUT031	CUTs	2	1	28	23	3.23437	0.00712376
CUT032	CUTs	40	36	53	61	-0.27311	0.603368
CUT033	CUTs	2	0	71	49	5.05505	3.39889e-05
CUT034	CUTs	6	2	146	112	4.15857	5.16095e-11
CUT035	CUTs	21	17	110	82	1.47959	0.000722904
CUT036	CUTs	0	0	12	14	5.28279	0.00755432
CUT037	CUTs	15	11	131	128	2.46127	8.84949e-09
CUT038	CUTs	10	7	120	96	2.81162	2.9221e-08
CUT039	CUTs	7	4	127	173	3.91693	1.55475e-12
CUT040	CUTs	9	4	174	177	3.90255	7.65502e-15
CUT041	CUTs	21	20	179	170	2.23006	2.75485e-10
CUT042	CUTs	19	16	206	199	2.67517	5.29913e-14
CUT043	CUTs	3	8	106	115	3.46045	2.02215e-09
CUT044	CUTs	11	8	170	159	3.25804	2.4436e-13
CUT045	CUTs	3	2	55	49	3.5227	4.43192e-05
CUT046	CUTs	185	174	291	325	-0.0807909	0.775593
CUT047	CUTs	20	20	417	298	3.29846	1.2018e-24
CUT048	CUTs	6	9	115	135	3.19576	3.47e-10
CUT049	CUTs	19	9	376	424	3.98496	5.45864e-31
CUT050	CUTs	12	12	175	146	2.88102	6.15935e-12
CUT051	CUTs	9	7	106	104	2.85797	2.71902e-08
CUT052	CUTs	6	4	29	29	1.68354	0.0498603
CUT053	CUTs	0	3	55	38	4.07904	0.000134599
CUT054	CUTs	10	17	92	100	1.96004	2.95491e-05
CUT055	CUTs	11	14	45	43	0.948484	0.140752
CUT056	CUTs	6	3	26	22	1.56745	0.100022
CUT057	CUTs	2	3	73	92	4.18428	1.76638e-07
CUT058	CUTs	2	0	79	97	5.60822	1.78649e-06
CUT059	CUTs	11	10	134	124	2.76029	1.15864e-09
CUT060	CUTs	1	1	46	50	4.7271	0.000139611
CUT061	CUTs	74	55	148	173	0.462889	0.161118
CUT062	CUTs	12	6	58	64	1.91372	0.00110256
CUT063	CUTs	11	6	68	66	2.1287	0.000200933
CUT064	CUTs	25	26	95	95	1.03544	0.0126752
CUT065	CUTs	40	37	205	217	1.59561	5.12474e-08
CUT066	CUTs	2	0	6	7	1.87887	0.382687
CUT067	CUTs	8	7	102	89	2.81215	1.58816e-07
CUT068	CUTs	0	1	20	21	4.49257	0.0150707
CUT069	CUTs	0	1	23	21	4.5941	0.0119437
CUT070	CUTs	133	128	177	211	-0.288222	0.31219
CUT071	CUTs	3	6	62	52	2.79366	7.76494e-05
CUT072	CUTs	2	5	33	24	2.14913	0.0218602
CUT073	CUTs	1	0	3	4	1.96313	0.51742
CUT074	CUTs	35	34	57	67	-0.0145266	0.98127
CUT075	CUTs	6	4	146	110	3.82128	5.69658e-11
CUT076	CUTs	10	6	141	136	3.25994	2.03163e-11
CUT077	CUTs	41	45	62	65	-0.302217	0.537733
CUT078	CUTs	13	9	154	163	2.99443	3.00522e-12
CUT079	CUTs	1	3	53	32	3.5381	0.000321097
CUT080	CUTs	1	2	47	55	4.22553	5.11091e-05
CUT081	CUTs	5	7	110	92	3.20937	1.68558e-08
CUT082	CUTs	1	2	43	39	3.90849	0.000297041
CUT083	CUTs	0	0	2	3	2.90553	0.418881
CUT084	CUTs	0	0	0	0	NA	NA
CUT085	CUTs	22	21	188	195	2.29589	1.80287e-11
CUT086	CUTs	55	39	139	127	0.648198	0.0653423
CUT087	CUTs	30	28	212	197	1.9586	3.87721e-10
CUT088	CUTs	11	12	216	219	3.38129	1.79226e-17
CUT089	CUTs	2	0	14	15	3.02279	0.0605948
CUT090	CUTs	211	192	368	410	0.0903751	0.727918
CUT091	CUTs	21	15	183	188	2.51095	3.5182e-12
CUT092	CUTs	17	13	364	315	3.64334	1.3239e-26
CUT093	CUTs	47	58	156	193	0.866354	0.00644157
CUT094	CUTs	4	1	34	18	2.53441	0.0175742
CUT095	CUTs	6	5	114	103	3.4444	2.02215e-09
CUT096	CUTs	22	10	141	115	2.15304	3.35259e-07
CUT097	CUTs	6	3	54	41	2.54879	0.000625678
CUT098	CUTs	10	5	129	127	3.24134	1.38983e-10
CUT099	CUTs	5	4	43	40	2.34842	0.0021918
CUT100	CUTs	6	8	32	29	1.25581	0.118738
CUT101	CUTs	1	4	69	41	3.58582	3.88252e-05
CUT102	CUTs	3	4	23	24	1.88207	0.05839
CUT103	CUTs	2	3	47	68	3.6629	1.7917e-05
CUT104	CUTs	2	0	18	11	3.02056	0.0626266
CUT105	CUTs	84	81	224	229	0.596574	0.0242646
CUT106	CUTs	5	11	99	98	2.75165	1.99655e-07
CUT107	CUTs	4	1	28	28	2.64274	0.00938465
CUT108	CUTs	10	3	117	92	3.15967	1.8239e-08
CUT109	CUTs	12	11	363	344	4.08367	1.95261e-28
CUT110	CUTs	14	10	183	173	3.03531	9.94493e-14
CUT111	CUTs	3	4	104	117	4.12054	9.27145e-10
CUT112	CUTs	2	5	109	123	4.18675	4.00397e-10
CUT113	CUTs	36	34	165	145	1.28664	9.15582e-05
CUT114	CUTs	16	7	193	143	3.01871	3.02489e-12
CUT115	CUTs	8	2	73	51	2.78825	5.21993e-05
CUT116	CUTs	1	0	55	55	5.92393	0.000320623
CUT117	CUTs	14	8	2122	1910	6.66102	2.56665e-88
CUT118	CUTs	10	11	191	154	3.17655	1.81366e-13
CUT119	CUTs	5	5	109	77	3.35633	5.91621e-08
CUT120	CUTs	0	0	6	4	3.90145	0.140522
CUT121	CUTs	3	2	96	84	4.31322	4.66174e-08
CUT122	CUTs	2	0	9	6	2.08039	0.305785
CUT123	CUTs	6	4	28	25	1.55315	0.0819617
CUT124	CUTs	6	6	29	24	1.28138	0.141533
CUT125	CUTs	13	12	74	85	1.81092	0.000264971
CUT126	CUTs	1	0	17	13	4.05199	0.0397585
CUT127	CUTs	14	11	30	36	0.5464	0.474039
CUT128	CUTs	9	8	37	21	0.909742	0.277961
CUT129	CUTs	14	9	185	168	3.08552	1.05977e-13
CUT130	CUTs	3	1	34	19	2.8788	0.00962177
CUT131	CUTs	46	43	76	74	-0.106821	0.836142
CUT132	CUTs	6	4	125	119	3.75315	1.07264e-10
CUT133	CUTs	9	11	144	130	2.91351	1.54303e-10
CUT134	CUTs	7	3	188	172	4.31619	5.00772e-15
CUT135	CUTs	25	11	340	333	3.37472	3.59502e-25
CUT136	CUTs	11	9	58	55	1.64159	0.00484018
CUT137	CUTs	30	10	4183	4041	6.85634	2.29045e-34
CUT138	CUTs	1	1	258	257	7.15061	9.56576e-11
CUT139	CUTs	5	7	19	23	0.939229	0.341303
CUT140	CUTs	3	1	34	29	3.12849	0.00273951
CUT141	CUTs	21	14	33	24	-0.147533	0.861853
CUT142	CUTs	11	10	232	209	3.53371	5.87983e-18
CUT143	CUTs	16	11	342	381	3.88807	1.3469e-28
CUT144	CUTs	87	79	610	558	1.95571	1.47465e-23
CUT145	CUTs	4	4	82	56	3.24742	4.23309e-06
CUT146	CUTs	39	18	2137	2136	5.3752	1.35896e-123
CUT147	CUTs	35	32	1109	1139	4.21034	1.92584e-79
CUT148	CUTs	97	65	355	321	1.20987	1.72021e-07
CUT149	CUTs	21	7	198	240	3.12314	1.24742e-15
CUT150	CUTs	114	55	6934	6699	5.50044	4.74082e-40
CUT151	CUTs	17	8	168	147	2.80547	2.39886e-11
CUT152	CUTs	0	1	12	10	3.5892	0.0887879
CUT153	CUTs	16	19	161	189	2.45992	4.38805e-11
CUT154	CUTs	11	8	36	39	1.12773	0.110415
CUT155	CUTs	5	4	69	53	2.90293	2.92917e-05
CUT156	CUTs	12	6	129	94	2.77952	3.42094e-08
CUT157	CUTs	0	0	2	5	3.3933	0.271897
CUT158	CUTs	94	84	240	260	0.632038	0.0121183
CUT159	CUTs	5	5	182	174	4.29504	5.75738e-15
CUT160	CUTs	21	9	682	649	4.61834	6.97039e-49
CUT161	CUTs	15	23	40	64	0.580994	0.360366
CUT162	CUTs	0	0	1	1	1.58155	0.783703
CUT163	CUTs	19	10	195	210	2.95317	7.61758e-15
CUT164	CUTs	11	8	142	131	2.98902	9.7414e-11
CUT165	CUTs	0	3	27	30	3.36893	0.00419225
CUT166	CUTs	14	11	85	83	1.89262	9.85442e-05
CUT167	CUTs	8	5	57	60	2.31772	0.000252551
CUT168	CUTs	1	3	117	116	5.00178	2.35954e-09
CUT169	CUTs	8	2	30	47	2.10957	0.00877788
CUT170	CUTs	1	3	81	81	4.47588	2.94602e-07
CUT171	CUTs	6	3	68	43	2.77209	0.00013117
CUT172	CUTs	2	2	36	42	3.42721	0.000513706
CUT173	CUTs	35	26	417	417	2.91788	2.43727e-28
CUT174	CUTs	2	0	64	58	5.07977	2.77209e-05
CUT175	CUTs	19	6	263	211	3.39748	9.95749e-18
CUT176	CUTs	2	0	72	76	5.35815	6.58327e-06
CUT177	CUTs	1	1	14	17	3.09599	0.046581
CUT178	CUTs	6	9	93	66	2.53818	9.00155e-06
CUT179	CUTs	2	2	122	82	4.81206	2.11168e-08
CUT180	CUTs	4	2	551	472	6.55625	6.36214e-25
CUT181	CUTs	19	16	626	507	4.1582	4.28542e-42
CUT182	CUTs	10	9	193	176	3.4211	4.10497e-15
CUT183	CUTs	1	6	45	55	2.95938	0.000205521
CUT184	CUTs	0	2	30	29	4.00967	0.00273178
CUT185	CUTs	4	4	6	12	0.311438	0.845914
CUT186	CUTs	4	4	60	66	3.11855	1.12953e-05
CUT187	CUTs	1	4	72	62	3.87515	2.75567e-06
CUT188	CUTs	39	30	645	458	3.14139	5.62201e-33
CUT189	CUTs	18	13	135	125	2.21335	6.55311e-08
CUT190	CUTs	7	6	70	82	2.69085	5.26312e-06
CUT191	CUTs	17	19	201	168	2.4949	7.93682e-12
CUT192	CUTs	1	0	4	1	1.47289	0.672627
CUT193	CUTs	82	64	74	85	-0.730442	0.0319346
CUT194	CUTs	3	4	89	71	3.652	2.83304e-07
CUT195	CUTs	8	9	27	25	0.748565	0.388889
CUT196	CUTs	2	4	75	84	3.86448	2.62038e-07
CUT197	CUTs	55	38	387	386	2.20205	1.36013e-19
CUT198	CUTs	13	4	61	59	1.97953	0.00115969
CUT199	CUTs	9	9	100	73	2.40324	5.7842e-06
CUT200	CUTs	23	27	314	274	2.69268	5.01872e-19
CUT201	CUTs	1	0	33	29	5.09739	0.00349852
CUT202	CUTs	17	13	67	66	1.29356	0.0117364
CUT203	CUTs	0	2	10	9	2.35644	0.200298
CUT204	CUTs	3	2	76	68	3.9917	9.73484e-07
CUT205	CUTs	30	33	197	199	1.78959	9.34155e-09
CUT206	CUTs	27	14	151	117	1.8602	2.63751e-06
CUT207	CUTs	11	12	121	167	2.78696	3.44476e-10
CUT208	CUTs	11	14	31	36	0.555233	0.466203
CUT209	CUTs	2	0	11	13	2.75321	0.107735
CUT210	CUTs	0	1	7	11	3.30094	0.138092
CUT211	CUTs	8	6	106	68	2.77789	1.34799e-06
CUT212	CUTs	8	7	25	25	0.879195	0.319035
CUT213	CUTs	2	2	46	59	3.85677	3.64965e-05
CUT214	CUTs	14	12	207	206	3.13208	4.80239e-16
CUT215	CUTs	5	4	69	52	2.89097	3.32767e-05
CUT216	CUTs	0	9	171	129	4.10573	0.106042
CUT217	CUTs	6	4	124	106	3.66748	4.66701e-10
CUT218	CUTs	2	5	101	101	3.98573	5.1546e-09
CUT219	CUTs	15	15	63	100	1.5833	0.00148648
CUT220	CUTs	9	10	54	61	1.73571	0.00307085
CUT221	CUTs	133	99	4662	4429	4.43713	9.80107e-220
CUT222	CUTs	18	1	2904	2350	7.32831	1.81658e-06
CUT223	CUTs	6	5	2906	2479	8.07684	1.16873e-69
CUT224	CUTs	4	0	4	11	1.1022	0.566272
CUT225	CUTs	1	4	26	18	2.25574	0.0427286
CUT226	CUTs	96	95	1498	1531	3.12719	2.26526e-83
CUT227	CUTs	24	20	107	110	1.44556	0.000297041
CUT228	CUTs	35	18	176	142	1.73762	1.29289e-06
CUT229	CUTs	9	7	65	50	1.98862	0.00112761
CUT230	CUTs	0	0	0	1	0.590209	0.948387
CUT231	CUTs	11	5	164	155	3.46582	3.19074e-13
CUT232	CUTs	4	6	22	8	0.708408	0.570638
CUT233	CUTs	29	18	446	400	3.31599	7.0779e-31
CUT234	CUTs	71	62	123	109	-0.0555863	0.904957
CUT235	CUTs	187	140	287	324	0.0498488	0.872168
CUT236	CUTs	8	4	71	96	2.94961	9.33659e-07
CUT237	CUTs	102	87	156	137	-0.225066	0.50148
CUT238	CUTs	0	0	0	4	2.59208	0.554868
CUT239	CUTs	0	0	1	3	2.58667	0.521609
CUT240	CUTs	0	0	4	8	4.16993	0.0932118
CUT241	CUTs	8	6	21	28	0.9546	0.289981
CUT242	CUTs	0	0	3	1	2.57642	0.524438
CUT243	CUTs	0	0	0	0	NA	NA
CUT244	CUTs	0	0	2	2	2.58155	0.518178
CUT245	CUTs	1	1	5	2	0.942523	0.727053
CUT246	CUTs	20	15	378	382	3.58457	1.11204e-29
CUT247	CUTs	25	19	24	35	-0.428665	0.538207
CUT248	CUTs	2	3	85	80	4.18293	1.55635e-07
CUT249	CUTs	27	17	219	265	2.6081	2.98189e-15
CUT250	CUTs	11	7	108	110	2.74495	2.78923e-08
CUT251	CUTs	5	10	74	74	2.4321	2.50294e-05
CUT252	CUTs	10	3	121	95	3.20696	8.71064e-09
CUT253	CUTs	13	13	117	122	2.34073	8.21368e-08
CUT254	CUTs	8	5	126	128	3.43395	7.96035e-11
CUT255	CUTs	19	20	111	93	1.52439	0.00029409
CUT256	CUTs	6	6	48	48	2.14002	0.00174455
CUT257	CUTs	22	23	48	62	0.427937	0.468236
CUT258	CUTs	1	2	28	31	3.43293	0.00299129
CUT259	CUTs	1	1	61	77	5.25158	1.11946e-05
CUT260	CUTs	14	12	217	196	3.13159	5.73381e-16
CUT261	CUTs	1	2	49	47	4.13687	8.43868e-05
CUT262	CUTs	13	7	187	160	3.26382	8.63008e-14
CUT263	CUTs	23	15	113	117	1.74587	1.73005e-05
CUT264	CUTs	14	18	58	65	1.07603	0.0453994
CUT265	CUTs	11	9	106	94	2.46464	4.86498e-07
CUT266	CUTs	11	10	28	15	0.172337	0.870002
CUT267	CUTs	9	10	117	99	2.64493	6.27128e-08
CUT268	CUTs	14	10	119	117	2.44302	4.81262e-08
CUT269	CUTs	14	7	385	326	4.22712	6.41922e-28
CUT270	CUTs	19	17	233	264	2.9298	8.21265e-18
CUT271	CUTs	18	10	77	60	1.44159	0.00602773
CUT272	CUTs	10	6	51	57	1.90457	0.0022003
CUT273	CUTs	16	15	248	216	3.04447	2.67537e-17
CUT274	CUTs	6	3	258	245	4.94905	3.85187e-19
CUT275	CUTs	2	3	41	32	3.00265	0.00135503
CUT276	CUTs	10	7	48	50	1.67408	0.00827304
CUT277	CUTs	1	1	19	9	2.94444	0.0702803
CUT278	CUTs	21	21	265	301	2.89334	1.03651e-19
CUT279	CUTs	19	12	103	114	1.95621	6.41231e-06
CUT280	CUTs	5	7	197	175	4.09243	1.24864e-15
CUT281	CUTs	100	77	560	583	1.83649	3.83894e-21
CUT282	CUTs	98	84	278	278	0.753937	0.00144155
CUT283	CUTs	9	13	93	88	2.17373	1.05868e-05
CUT284	CUTs	17	28	58	52	0.41333	0.497072
CUT285	CUTs	3	3	52	44	3.13999	0.000146739
CUT286	CUTs	5	4	185	152	4.36858	4.94553e-14
CUT287	CUTs	19	29	109	90	1.17913	0.00581932
CUT288	CUTs	3	1	66	67	4.20328	2.9509e-06
CUT289	CUTs	149	126	185	170	-0.48867	0.0521551
CUT290	CUTs	114	97	212	251	0.27764	0.340526
CUT291	CUTs	85	58	237	257	0.937912	0.000297474
CUT292	CUTs	53	63	82	68	-0.497808	0.220725
CUT293	CUTs	1	3	19	27	2.6517	0.0206645
CUT294	CUTs	0	4	24	27	2.78575	0.0132325
CUT295	CUTs	26	17	542	475	3.70864	3.02204e-38
CUT296	CUTs	4	2	56	41	3.16175	0.000146147
CUT297	CUTs	9	11	65	43	1.56599	0.0102383
CUT298	CUTs	2	4	19	31	2.18982	0.0319802
CUT299	CUTs	18	21	184	140	2.1899	5.29009e-09
CUT300	CUTs	14	7	125	128	2.74072	2.57265e-09
CUT301	CUTs	19	31	353	304	2.8473	5.09603e-21
CUT302	CUTs	2	0	27	19	3.68035	0.00978569
CUT303	CUTs	40	39	343	255	2.05857	1.67647e-13
CUT304	CUTs	1	3	77	47	4.08545	8.94188e-06
CUT305	CUTs	5	4	60	63	2.91623	2.29685e-05
CUT306	CUTs	76	66	8024	7017	5.86848	2.56529e-294
CUT307	CUTs	5	0	678	651	7.19892	1.02655e-25
CUT308	CUTs	0	0	541	393	10.4471	1.00613e-11
CUT309	CUTs	4	1	71	43	3.66096	2.46033e-05
CUT310	CUTs	5	2	193	189	4.91563	6.83682e-15
CUT311	CUTs	10	5	336	321	4.59818	1.03699e-25
CUT312	CUTs	0	5	20	17	1.98747	0.105246
CUT313	CUTs	4	3	80	91	3.75475	8.72243e-08
CUT314	CUTs	15	24	59	84	1.00262	0.0539987
CUT315	CUTs	0	2	8	14	2.57321	0.143425
CUT316	CUTs	17	9	214	189	3.10204	2.72864e-15
CUT317	CUTs	3	5	121	116	4.0262	1.97208e-10
CUT318	CUTs	0	1	57	61	6.02135	0.000237214
CUT319	CUTs	7	5	89	82	2.97723	3.95113e-07
CUT320	CUTs	7	3	118	90	3.52616	5.92518e-09
CUT321	CUTs	5	4	69	53	2.90293	2.92917e-05
CUT322	CUTs	9	6	220	186	3.90217	7.15288e-17
CUT323	CUTs	40	35	114	119	0.777789	0.0356803
CUT324	CUTs	0	0	4	6	3.90553	0.140003
CUT325	CUTs	29	36	262	208	1.98777	8.33161e-11
CUT326	CUTs	82	69	155	178	0.284985	0.400192
CUT327	CUTs	3	1	46	39	3.55877	0.000259436
CUT328	CUTs	9	4	76	51	2.43903	0.000126074
CUT329	CUTs	4	1	67	64	3.86201	3.38211e-06
CUT330	CUTs	5	7	109	99	3.25219	7.85874e-09
CUT331	CUTs	10	13	53	47	1.25299	0.0393105
CUT332	CUTs	5	6	180	157	4.07645	2.76665e-14
CUT333	CUTs	8	2	44	26	1.96833	0.0188731
CUT334	CUTs	1	4	17	20	2.00661	0.0897363
CUT335	CUTs	7	1	135	130	4.2016	2.37558e-11
CUT336	CUTs	5	7	27	34	1.47925	0.0728206
CUT337	CUTs	74	55	1660	1599	3.80348	6.37383e-103
CUT338	CUTs	0	0	68	55	7.52299	4.07241e-06
CUT339	CUTs	8	3	21	29	1.34582	0.147355
CUT340	CUTs	24	16	263	221	2.74245	2.76044e-16
CUT341	CUTs	2	0	60	31	4.6573	0.000259436
[truncated: 8,432 more rows]

## Sheet: C) rpb1-84 rrp6∆ vs. WT
Name	Type	WT (YFN116)_rep1_counts	WT (YFN116)_rep2_counts	rpb1-84 rrp6∆ (YFN545)_rep1_counts	rpb1-84 rrp6∆ (YFN545)_rep1_counts	Log2(FC) rpb1-84 rrp6∆ vs. WT	P-adj
10F134	XUTs	13	20	14	22	-0.503847	0.596193
10F136	XUTs	21	16	118	109	1.97844	2.30725e-06
10F143	XUTs	0	4	4	1	-0.473512	0.874633
10F149	XUTs	1	2	3	1	-0.314506	NA
10F15	XUTs	42	39	160	136	1.21992	0.000223059
10F151	XUTs	2	2	11	13	1.95844	0.184978
10F158	XUTs	0	0	6	0	3.20347	NA
10F170	XUTs	0	0	3	2	3.0947	NA
10F174	XUTs	0	0	1	1	1.80418	NA
10F179	XUTs	1	0	7	4	2.79286	0.297664
10F18	XUTs	0	0	0	2	1.95622	NA
10F183	XUTs	2	0	1	1	-0.572427	NA
10F200	XUTs	0	0	3	7	4.18762	0.12142
10F203	XUTs	22	11	26	31	0.181079	0.84649
10F209	XUTs	0	0	0	0	NA	NA
10F213	XUTs	1	1	1	2	-0.0154756	NA
10F22	XUTs	1	0	1	0	-0.666294	NA
10F25	XUTs	4	7	11	5	-0.170176	0.92068
10F253	XUTs	0	0	2	2	2.80424	NA
10F293	XUTs	2	3	3	2	-0.681932	0.791498
10F300	XUTs	0	0	1	2	2.44019	NA
10F305	XUTs	0	2	4	0	0.14096	NA
10F310	XUTs	1	2	10	3	1.37855	0.518161
10F32	XUTs	9	7	3	5	-1.61191	0.228111
10F321	XUTs	3	4	11	11	1.00404	0.490911
10F324	XUTs	5	0	0	5	-0.371385	0.962188
10F326	XUTs	1	2	2	0	-1.37002	NA
10F37	XUTs	0	0	1	1	1.80418	NA
10F42	XUTs	13	12	48	21	0.769199	0.329808
10F44	XUTs	8	2	27	26	1.79267	0.0580313
10F48	XUTs	47	34	180	147	1.3672	1.84007e-05
10F49	XUTs	4	3	97	76	3.97483	1.98324e-08
10F50	XUTs	1	0	2	0	0.236837	NA
10F55	XUTs	32	24	82	59	0.676659	0.175049
10F57	XUTs	3	1	7	1	0.28309	0.918312
10F6	XUTs	2	1	0	1	-2.15055	NA
10F62	XUTs	19	18	20	14	-0.785722	0.32689
10F65	XUTs	1	1	4	4	1.36016	0.609744
10F67	XUTs	0	0	0	0	NA	NA
10F68	XUTs	1	2	6	5	1.20456	0.586658
10F73	XUTs	0	2	20	25	3.85293	0.00811883
10F76	XUTs	4	5	60	36	2.73553	0.00034466
10F82	XUTs	3	2	0	1	-2.91422	NA
10F85	XUTs	4	8	9	10	0.00612083	0.996721
10F86	XUTs	34	39	192	153	1.58119	7.87929e-07
10F87	XUTs	3	6	35	18	1.85551	0.0540705
10F9	XUTs	2	4	48	46	3.32118	9.97144e-05
10R101	XUTs	1	3	125	78	4.98817	7.27382e-09
10R114	XUTs	9	7	23	16	0.626544	0.556435
10R116	XUTs	4	2	9	14	1.3474	0.3502
10R117	XUTs	3	6	37	25	2.103	0.0179935
10R119	XUTs	0	0	4	1	3.02913	NA
10R125	XUTs	0	0	2	1	2.33636	NA
10R128	XUTs	28	27	69	43	0.353312	0.564315
10R131	XUTs	3	5	11	12	0.875228	0.541349
10R136	XUTs	11	2	10	7	-0.230174	0.889942
10R143	XUTs	0	0	0	0	NA	NA
10R155	XUTs	9	12	74	49	1.87455	0.00133636
10R165	XUTs	4	1	3	1	-0.982881	0.714995
10R181	XUTs	20	15	193	147	2.62669	1.85787e-12
10R186	XUTs	39	29	180	201	1.86365	1.55185e-08
10R197	XUTs	4	2	12	6	0.915098	0.588162
10R203	XUTs	10	10	145	110	3.0142	9.92978e-11
10R206	XUTs	23	22	40	22	-0.217388	0.792948
10R209	XUTs	6	5	27	11	1.09122	0.32509
10R21	XUTs	7	6	239	191	4.39566	1.40938e-19
10R212	XUTs	10	9	26	22	0.687482	0.45808
10R228	XUTs	1	4	12	10	1.45507	0.339331
10R233	XUTs	38	41	20	21	-1.59299	0.00272809
10R234	XUTs	0	1	6	2	2.26128	NA
10R237	XUTs	20	15	311	204	3.21384	5.78226e-21
10R242	XUTs	20	18	138	81	1.85098	1.66861e-05
10R245	XUTs	2	0	3	2	0.712557	NA
10R248	XUTs	0	0	0	2	1.95622	NA
10R249	XUTs	200	145	266	225	-0.133151	0.652392
10R254	XUTs	4	3	108	71	4.01066	1.42164e-08
10R257	XUTs	0	0	1	4	3.21751	NA
10R258	XUTs	0	1	1	2	0.954681	NA
10R276	XUTs	123	115	533	524	1.51279	3.55715e-15
10R284	XUTs	1	1	5	4	1.51431	0.549462
10R287	XUTs	76	82	117	101	-0.190499	0.65222
10R288	XUTs	11	12	25	41	0.913267	0.255003
10R29	XUTs	3	4	51	38	3.00479	0.000278816
10R39	XUTs	40	27	148	124	1.37891	9.91743e-05
10R50	XUTs	0	0	2	3	3.15701	NA
10R52	XUTs	29	22	94	64	0.971286	0.0371296
10R6	XUTs	1	4	0	3	-1.31453	0.63868
10R61	XUTs	0	0	1	0	0.744495	NA
10R62	XUTs	0	0	0	0	NA	NA
10R63	XUTs	1	1	2	0	-0.770862	NA
10R78	XUTs	4	2	4	3	-0.416542	0.856084
10R84	XUTs	81	67	213	155	0.656495	0.0231552
10R89	XUTs	1	1	6	3	1.48157	0.564315
10R92	XUTs	22	14	33	18	-0.16441	0.859788
10R93	XUTs	1	0	1	1	0.382353	NA
11F10	XUTs	38	45	74	69	0.132705	0.821797
11F102	XUTs	4	3	6	5	0.00677985	0.997096
11F103	XUTs	2	1	25	16	3.1108	0.0183098
11F113	XUTs	0	1	0	0	-2.15924	NA
11F136	XUTs	1	0	0	0	-2.05985	NA
11F137	XUTs	0	0	0	0	NA	NA
11F153	XUTs	11	7	312	223	4.23516	4.70616e-24
11F155	XUTs	16	13	42	30	0.653605	0.373317
11F16	XUTs	4	6	21	8	0.818368	0.535876
11F160	XUTs	0	0	0	0	NA	NA
11F176	XUTs	3	3	76	73	3.99491	2.15941e-07
11F183	XUTs	97	84	136	73	-0.470841	0.188228
11F187	XUTs	2	1	5	4	0.946785	0.700912
11F191	XUTs	5	0	10	11	1.49216	0.361389
11F200	XUTs	161	173	266	222	-0.110033	0.720574
11F204	XUTs	3	0	34	35	3.909	0.000773999
11F205	XUTs	0	0	1	0	0.744495	NA
11F207	XUTs	4	4	4	5	-0.459902	0.817984
11F209	XUTs	12	12	31	16	0.283664	0.784851
11F210	XUTs	3	9	22	18	1.05436	0.325219
11F216	XUTs	0	0	4	3	3.58919	NA
11F230	XUTs	116	129	553	375	1.24911	2.17961e-10
11F231	XUTs	4	9	15	12	0.373748	0.789155
11F244	XUTs	27	30	50	33	-0.131156	0.856302
11F25	XUTs	58	58	402	307	1.95273	2.75554e-17
11F252	XUTs	0	0	4	1	3.02913	NA
11F258	XUTs	30	35	69	50	0.203806	0.746716
11F259	XUTs	0	0	0	0	NA	NA
11F26	XUTs	12	11	117	83	2.45812	3.39577e-07
11F264	XUTs	68	58	129	70	-0.018618	0.97444
11F265	XUTs	0	0	1	0	0.744495	NA
11F27	XUTs	2	3	33	18	2.66111	0.0141044
11F270	XUTs	1	0	24	19	4.7763	0.0109766
11F272	XUTs	36	25	10	3	-2.90728	5.55857e-05
11F281	XUTs	0	0	0	0	NA	NA
11F288	XUTs	2	1	1	0	-2.24356	NA
11F290	XUTs	3	5	8	10	0.529143	0.75142
11F292	XUTs	0	0	0	0	NA	NA
11F298	XUTs	1	1	0	0	-3.09137	NA
11F3	XUTs	7	7	24	18	0.924165	0.353371
11F300	XUTs	0	0	0	0	NA	NA
11F35	XUTs	6	4	22	6	0.772159	0.577851
11F36	XUTs	15	14	34	38	0.680977	0.35532
11F43	XUTs	1	1	3	3	0.944345	NA
11F58	XUTs	11	13	24	27	0.449206	0.634246
11F64	XUTs	48	36	121	90	0.675578	0.0869748
11F68	XUTs	24	10	60	61	1.21637	0.0334996
11F77	XUTs	54	42	90	66	0.0456827	0.936284
11F8	XUTs	0	0	0	0	NA	NA
11F84	XUTs	0	0	0	1	0.930898	NA
11F87	XUTs	12	24	56	50	0.889504	0.150441
11F88	XUTs	6	4	28	26	1.79741	0.0478407
11F90	XUTs	17	11	82	67	1.76767	0.000546616
11R107	XUTs	10	9	55	36	1.5922	0.0166656
11R109	XUTs	2	1	77	61	4.87349	1.74351e-06
11R112	XUTs	1	1	11	8	2.58631	0.165741
11R114	XUTs	65	58	139	127	0.468847	0.188944
11R117	XUTs	45	35	151	102	0.999699	0.00535846
11R12	XUTs	35	24	96	68	0.82066	0.0724101
11R124	XUTs	96	95	198	156	0.232429	0.481792
11R125	XUTs	8	1	39	22	2.11424	0.0250359
11R128	XUTs	0	1	2	7	2.59283	0.361776
11R13	XUTs	23	24	89	71	1.10985	0.0161871
11R130	XUTs	13	6	29	23	0.816841	0.36226
11R134	XUTs	10	11	29	16	0.41486	0.68833
11R139	XUTs	1	0	1	1	0.382353	NA
11R142	XUTs	0	0	0	0	NA	NA
11R146	XUTs	1	2	0	2	-1.143	NA
11R158	XUTs	9	4	30	27	1.50434	0.0823771
11R163	XUTs	9	13	18	10	-0.344745	0.773444
11R166	XUTs	10	10	10	7	-0.899977	0.430669
11R167	XUTs	0	0	6	2	3.72393	NA
11R171	XUTs	6	7	22	12	0.699902	0.548675
11R173	XUTs	1	3	2	0	-1.79045	NA
11R192	XUTs	0	0	0	2	1.95622	NA
11R2	XUTs	7	6	14	14	0.470138	0.718128
11R208	XUTs	0	0	0	0	NA	NA
11R209	XUTs	0	0	0	0	NA	NA
11R223	XUTs	13	15	280	228	3.52721	2.17411e-22
11R226	XUTs	35	34	168	138	1.49574	7.39447e-06
11R246	XUTs	0	1	0	0	-2.15924	NA
11R247	XUTs	2	0	8	2	1.64039	0.534387
11R249	XUTs	8	3	92	62	3.15287	7.90411e-07
11R260	XUTs	18	10	76	77	1.82559	0.000399325
11R262	XUTs	39	26	52	43	-0.0942227	0.892479
11R265	XUTs	3	1	45	73	4.29336	7.54431e-06
11R267	XUTs	3	2	17	18	2.181	0.0740034
11R270	XUTs	0	0	0	0	NA	NA
11R273	XUTs	14	8	51	34	1.29505	0.0570926
11R274	XUTs	1	1	0	3	0.0731443	NA
11R39	XUTs	1	2	6	5	1.20456	0.586658
11R48	XUTs	0	0	0	0	NA	NA
11R53	XUTs	0	0	0	0	NA	NA
11R63	XUTs	9	7	52	32	1.7235	0.0151746
11R7	XUTs	0	0	0	0	NA	NA
11R8	XUTs	3	2	1	1	-1.95529	NA
11R81	XUTs	3	6	6	1	-1.11852	0.557988
11R82	XUTs	2	1	4	1	0.0346625	NA
11R92	XUTs	4	7	22	13	0.977246	0.389745
11R94	XUTs	8	5	13	3	-0.41111	0.800557
11R97	XUTs	0	0	0	0	NA	NA
12F1	XUTs	0	0	6	5	4.24946	0.105586
12F109	XUTs	4	4	117	62	3.79902	3.03648e-08
12F113	XUTs	3	4	6	2	-0.524377	0.808217
12F121	XUTs	1	2	49	34	4.1205	0.000193358
12F134	XUTs	4	2	6	3	-0.0800108	0.974765
12F142	XUTs	4	4	31	15	1.83223	0.0758052
12F150	XUTs	13	7	26	23	0.661035	0.477822
12F154	XUTs	0	0	6	4	4.09471	0.134348
12F157	XUTs	24	25	30	26	-0.461186	0.520754
12F159	XUTs	1	4	8	4	0.538679	0.803389
12F16	XUTs	4	6	87	67	3.28294	3.95591e-07
12F160	XUTs	1	0	1	3	1.45158	NA
12F165	XUTs	14	12	157	103	2.65504	1.17444e-09
12F180	XUTs	5	3	27	13	1.64213	0.134919
12F184	XUTs	4	5	38	29	2.23347	0.0086987
12F185	XUTs	2	4	29	24	2.47906	0.0144596
12F188	XUTs	1170	1027	668	543	-1.51141	1.19189e-46
12F191	XUTs	28	28	75	48	0.463086	0.406942
12F193	XUTs	1	4	77	49	3.97333	3.40194e-06
12F198	XUTs	8	7	35	25	1.33935	0.103593
12F208	XUTs	41	37	332	260	2.26947	7.51471e-18
12F209	XUTs	9	10	52	28	1.38716	0.0536863
12F215	XUTs	0	2	3	6	1.53015	0.555983
12F216	XUTs	0	0	4	4	3.80425	NA
12F221	XUTs	2	5	9	14	1.08388	0.455079
12F231	XUTs	13	14	65	49	1.41605	0.0133769
12F236	XUTs	1	2	62	79	4.93425	1.45797e-06
12F239	XUTs	0	0	0	0	NA	NA
12F247	XUTs	3	1	24	18	2.74894	0.0235355
12F253	XUTs	3	0	29	30	3.68567	0.00227456
12F257	XUTs	12	8	198	154	3.48625	9.56037e-16
12F270	XUTs	7	10	95	52	2.42227	3.57233e-05
12F272	XUTs	5	4	24	27	1.87721	0.0476052
12F287	XUTs	0	1	0	0	-2.15924	NA
12F289	XUTs	7	3	7	11	0.262167	0.874712
12F293	XUTs	14	10	155	138	2.96871	4.889e-12
12F317	XUTs	3	0	10	4	1.56913	0.459029
12F33	XUTs	0	0	0	0	NA	NA
12F336	XUTs	3	4	42	37	2.84504	0.00086992
12F347	XUTs	15	10	46	23	0.787483	0.310917
12F359	XUTs	7	8	50	25	1.62935	0.0337615
12F361	XUTs	0	0	1	0	0.744495	NA
12F375	XUTs	1	0	0	1	-0.521888	NA
12F394	XUTs	3	4	8	3	-0.0606979	0.979153
12F4	XUTs	0	0	3	0	2.2198	NA
12F404	XUTs	35	36	330	261	2.40095	7.13755e-19
12F46	XUTs	0	0	0	1	0.930898	NA
12F54	XUTs	10	7	75	50	2.21675	0.000234724
12F56	XUTs	5	2	11	14	1.23657	0.366659
12F6	XUTs	25	29	93	51	0.72733	0.157442
12F68	XUTs	4	4	31	29	2.26365	0.0124978
12F70	XUTs	5	10	69	41	2.18333	0.000990226
12F77	XUTs	22	19	126	96	1.78112	1.40826e-05
12F82	XUTs	2	3	3	2	-0.681932	0.791498
12F84	XUTs	15	18	173	217	2.94062	7.57719e-14
12F85	XUTs	8	11	38	41	1.41393	0.047432
12F86	XUTs	1	0	1	0	-0.666294	NA
12F87	XUTs	0	0	3	0	2.2198	NA
12F9	XUTs	1	0	0	1	-0.521888	NA
12F90	XUTs	148	136	320	199	0.197761	0.493984
12F94	XUTs	6	7	30	27	1.48158	0.0824908
12F96	XUTs	0	0	2	2	2.80424	NA
12F98	XUTs	74	33	257	171	1.35917	0.0105475
12R107	XUTs	7	6	31	18	1.23962	0.184624
12R113	XUTs	37	16	75	49	0.580494	0.318565
12R126	XUTs	6	3	10	14	0.817157	0.560096
12R135	XUTs	0	0	2	1	2.33636	NA
12R137	XUTs	0	0	0	0	NA	NA
12R141	XUTs	7	1	6	10	0.4432	0.812926
12R144	XUTs	6	2	45	31	2.5994	0.00228566
12R149	XUTs	0	0	0	0	NA	NA
12R16	XUTs	0	0	28	24	6.49265	0.000305164
12R162	XUTs	0	0	1	0	0.744495	NA
12R167	XUTs	0	1	3	0	0.749106	NA
12R171	XUTs	12	15	36	20	0.364082	0.695389
12R191	XUTs	0	0	0	0	NA	NA
12R197	XUTs	0	0	0	2	1.95622	NA
12R207	XUTs	16	18	13	15	-0.920416	0.278634
12R212	XUTs	0	2	11	8	2.55138	0.179401
12R215	XUTs	6	3	14	2	0.102465	0.960885
12R220	XUTs	0	0	0	4	2.97235	NA
12R229	XUTs	26	12	51	37	0.570826	0.405047
12R232	XUTs	3	0	2	3	0.189351	NA
12R235	XUTs	209	160	456	324	0.423136	0.038085
12R237	XUTs	97	80	737	670	2.34998	4.51464e-38
12R239	XUTs	1	4	4	7	0.497601	0.821691
12R244	XUTs	3	1	4	4	0.388925	0.877557
12R249	XUTs	14	22	147	98	2.08793	7.54379e-07
12R250	XUTs	10	11	18	7	-0.452472	0.708147
12R257	XUTs	0	1	0	0	-2.15924	NA
12R265	XUTs	11	5	16	9	-0.0114394	0.994917
12R267	XUTs	0	0	0	0	NA	NA
12R27	XUTs	4	2	4	2	-0.661914	0.780516
12R287	XUTs	8	12	40	36	1.26815	0.0784199
12R297	XUTs	22	22	70	31	0.501504	0.450152
12R299	XUTs	677	559	1387	1338	0.505747	0.000144539
12R3	XUTs	0	2	0	3	0.00896346	NA
12R304	XUTs	1	2	0	0	-3.70328	NA
12R306	XUTs	17	8	74	63	1.81999	0.000888621
12R31	XUTs	0	1	3	4	2.16586	NA
12R313	XUTs	0	0	0	0	NA	NA
12R328	XUTs	12	4	30	40	1.538	0.0548531
12R33	XUTs	1	1	8	3	1.75232	0.459299
12R336	XUTs	70	67	121	97	0.0145736	0.978097
12R337	XUTs	3	4	53	30	2.88324	0.00074193
12R341	XUTs	5	3	12	27	1.71618	0.127925
12R346	XUTs	4	5	42	34	2.42015	0.00294372
12R348	XUTs	6	4	43	37	2.35799	0.00256712
12R352	XUTs	85	69	310	253	1.22121	2.24207e-07
12R354	XUTs	0	0	1	0	0.744495	NA
12R361	XUTs	25	9	60	48	1.03883	0.0902745
12R370	XUTs	25	20	46	38	0.252687	0.730872
12R385	XUTs	15	17	98	73	1.75426	0.000215262
12R387	XUTs	2	8	39	32	2.14911	0.0110437
12R389	XUTs	0	2	2	1	-0.167524	NA
12R391	XUTs	0	0	0	1	0.930898	NA
12R44	XUTs	9	11	27	22	0.631649	0.495333
12R5	XUTs	0	0	2	1	2.33636	NA
12R50	XUTs	0	0	2	1	2.33636	NA
12R7	XUTs	0	0	0	0	NA	NA
12R76	XUTs	22	18	30	14	-0.545765	0.50323
12R85	XUTs	0	0	0	0	NA	NA
12R96	XUTs	1	0	11	5	3.31486	0.166182
13F10	XUTs	1	0	20	9	4.16846	0.0419072
13F106	XUTs	4	7	47	40	2.32294	0.00191093
13F112	XUTs	0	0	3	0	2.2198	NA
13F116	XUTs	1	2	17	10	2.48102	0.101073
13F12	XUTs	0	0	1	1	1.80418	NA
13F126	XUTs	0	0	0	0	NA	NA
13F129	XUTs	3	4	7	3	-0.190216	0.928887
13F137	XUTs	9	5	73	61	2.61714	2.07852e-05
13F14	XUTs	34	26	84	60	0.606501	0.22071
13F142	XUTs	0	0	0	2	1.95622	NA
13F146	XUTs	6	5	29	20	1.49326	0.111525
13F151	XUTs	10	9	19	13	0.0881222	0.943702
13F153	XUTs	6	8	28	12	0.807383	0.455281
13F160	XUTs	1	2	21	11	2.71882	0.0578296
13F161	XUTs	18	19	64	45	0.89177	0.120656
13F171	XUTs	4	2	3	3	-0.621082	0.792818
13F174	XUTs	21	8	20	14	-0.404873	0.700229
13F179	XUTs	0	1	0	0	-2.15924	NA
13F184	XUTs	0	3	19	12	2.66242	0.0702419
13F191	XUTs	7	1	37	23	2.26401	0.0177556
13F192	XUTs	0	0	8	6	4.5892	0.0575477
13F195	XUTs	31	20	142	114	1.68251	8.81019e-06
13F199	XUTs	1	0	2	2	1.38023	NA
13F20	XUTs	1	0	2	2	1.38023	NA
13F201	XUTs	0	0	2	2	2.80424	NA
13F206	XUTs	12	5	23	14	0.472083	0.685599
13F208	XUTs	0	0	20	6	5.41755	0.00954504
13F209	XUTs	65	42	324	254	1.78676	1.81103e-12
13F213	XUTs	0	0	6	2	3.72393	NA
13F214	XUTs	2	4	10	15	1.43176	0.30214
13F217	XUTs	13	5	232	165	3.80975	9.16396e-18
13F218	XUTs	2	5	11	7	0.66521	0.697589
13F221	XUTs	4	2	5	2	-0.453007	0.84511
13F222	XUTs	6	9	14	8	-0.139401	0.923817
13F229	XUTs	10	12	71	52	1.81713	0.00154295
13F239	XUTs	3	4	5	2	-0.706701	0.742337
13F247	XUTs	5	4	27	18	1.65831	0.0984397
13F256	XUTs	4	4	33	27	2.25365	0.0129524
13F259	XUTs	13	15	23	15	-0.234526	0.821965
13F261	XUTs	5	5	5	4	-0.809682	0.642988
13F272	XUTs	4	1	77	52	4.03361	2.23772e-06
13F274	XUTs	1	0	4	1	1.61091	NA
13F286	XUTs	36	18	64	35	0.213714	0.773444
13F294	XUTs	14	18	99	76	1.78697	0.000154232
13F3	XUTs	73	64	497	419	2.09279	8.49632e-24
13F30	XUTs	6	4	15	8	0.529723	0.720462
13F315	XUTs	7	2	28	19	1.74312	0.0844167
13F321	XUTs	16	14	37	18	0.189036	0.843929
13F333	XUTs	26	42	62	40	-0.103487	0.883161
13F337	XUTs	1	2	5	3	0.720374	0.785381
13F339	XUTs	29	30	108	100	1.1714	0.00361262
13F342	XUTs	2	0	2	3	0.768795	NA
13F349	XUTs	5	3	36	23	2.22082	0.0161229
13F350	XUTs	35	21	50	35	-0.0473347	0.952458
13F354	XUTs	18	9	23	17	-0.073154	0.948695
13F359	XUTs	5	9	21	24	1.03817	0.287402
13F364	XUTs	3	2	2	2	-0.952938	0.712116
13F370	XUTs	10	5	500	343	5.15113	1.6643e-33
13F373	XUTs	6	5	14	20	1.01796	0.368158
13F375	XUTs	18	8	38	35	0.865637	0.243656
13F376	XUTs	82	79	157	137	0.218931	0.556199
13F390	XUTs	8	8	13	15	0.174964	0.894046
13F393	XUTs	20	9	35	39	0.741923	0.320851
13F398	XUTs	57	51	72	56	-0.41033	0.366659
13F43	XUTs	4	7	6	2	-1.18266	0.475217
13F5	XUTs	0	1	2	5	2.2074	NA
13F51	XUTs	20	21	51	44	0.55945	0.374196
13F52	XUTs	7	4	29	9	1.08471	0.345576
13F54	XUTs	0	0	1	0	0.744495	NA
13F59	XUTs	1	0	2	2	1.38023	NA
13F63	XUTs	0	1	7	4	2.76133	0.301163
13F65	XUTs	21	12	19	11	-0.794956	0.367148
13F80	XUTs	38	28	107	81	0.858546	0.0403414
13F98	XUTs	4	1	6	7	0.783556	0.698983
13R108	XUTs	195	161	283	180	-0.287008	0.262693
13R110	XUTs	3	5	35	23	2.17856	0.0189482
13R114	XUTs	8	12	36	35	1.17519	0.115797
13R117	XUTs	17	24	12	8	-1.71606	0.0275119
13R124	XUTs	5	2	12	14	1.28669	0.337865
13R127	XUTs	2	1	5	1	0.285643	0.925907
13R132	XUTs	60	53	179	133	0.807112	0.010258
13R134	XUTs	2	4	22	16	1.98682	0.084738
13R14	XUTs	7	4	13	9	0.350226	0.817921
13R147	XUTs	0	0	0	0	NA	NA
13R153	XUTs	34	37	103	78	0.687161	0.111917
13R177	XUTs	7	9	46	35	1.67487	0.0190947
13R182	XUTs	0	1	0	0	-2.15924	NA
13R183	XUTs	2	0	0	1	-1.49048	NA
13R188	XUTs	0	0	0	0	NA	NA
13R196	XUTs	28	25	105	84	1.18125	0.00491943
13R199	XUTs	0	0	0	1	0.930898	NA
13R2	XUTs	4	6	42	33	2.24291	0.00511663
13R20	XUTs	15	14	155	103	2.48583	4.96555e-09
13R201	XUTs	1	1	3	0	-0.196099	NA
13R216	XUTs	9	7	24	24	0.951442	0.300348
13R217	XUTs	9	9	43	26	1.26272	0.098766
13R228	XUTs	21	8	113	87	2.14723	6.11415e-06
13R232	XUTs	3	1	7	7	1.19349	0.537075
13R234	XUTs	23	11	54	37	0.773878	0.241205
13R236	XUTs	8	7	9	4	-0.892494	0.51771
13R242	XUTs	0	2	7	4	1.73367	0.470394
13R245	XUTs	8	1	6	3	-0.629437	0.758311
13R253	XUTs	1	2	22	22	3.22895	0.0116321
13R255	XUTs	4	2	29	16	2.23778	0.0403414
13R27	XUTs	0	0	3	4	3.6337	NA
13R272	XUTs	0	0	0	0	NA	NA
13R275	XUTs	3	2	35	33	3.12931	0.00139153
13R276	XUTs	0	0	3	4	3.6337	NA
13R279	XUTs	20	24	75	52	0.857498	0.106703
13R293	XUTs	36	25	162	128	1.60133	4.68129e-06
13R294	XUTs	1	5	29	32	2.69283	0.00623038
13R297	XUTs	1	0	3	4	2.20592	NA
13R303	XUTs	8	4	16	18	0.889325	0.433195
13R307	XUTs	1	3	45	25	3.43605	0.0011109
13R313	XUTs	6	4	21	20	1.40235	0.173219
13R316	XUTs	17	5	35	26	0.842574	0.323921
13R330	XUTs	50	28	73	55	0.0722738	0.910485
13R340	XUTs	9	3	115	83	3.39516	6.11406e-09
13R341	XUTs	10	3	69	53	2.59182	8.04283e-05
13R356	XUTs	0	0	0	0	NA	NA
13R357	XUTs	4	1	7	9	1.08881	0.544082
13R362	XUTs	14	14	15	20	-0.302534	0.776172
13R378	XUTs	0	0	1	1	1.80418	NA
13R385	XUTs	2	1	4	5	0.978014	0.690242
13R388	XUTs	14	7	13	4	-0.990017	0.400639
13R389	XUTs	12	5	15	14	0.150725	0.909814
13R400	XUTs	2	2	4	5	0.543696	0.82019
13R402	XUTs	5	5	10	11	0.435415	0.777438
13R411	XUTs	9	14	41	27	0.881318	0.255281
13R422	XUTs	0	2	1	0	-1.76498	NA
13R47	XUTs	15	15	65	56	1.36148	0.0131156
13R52	XUTs	2	0	1	1	-0.572427	NA
13R69	XUTs	1	0	1	0	-0.666294	NA
13R73	XUTs	6	4	25	30	1.84298	0.0421628
13R87	XUTs	40	24	329	279	2.607	1.41009e-20
13R88	XUTs	0	2	3	6	1.53015	0.555983
13R97	XUTs	3	4	10	4	0.290032	0.881393
14F101	XUTs	9	7	96	87	2.87467	1.10946e-07
14F102	XUTs	78	42	212	234	1.28166	2.72416e-05
14F115	XUTs	0	0	1	3	2.88042	NA
14F116	XUTs	0	1	10	1	2.66788	0.349794
14F118	XUTs	27	20	100	64	1.13893	0.014
14F123	XUTs	15	21	172	133	2.41894	3.72194e-10
14F126	XUTs	3	1	16	11	2.10884	0.140449
14F133	XUTs	1	5	19	9	1.49518	0.28098
14F142	XUTs	47	48	134	103	0.658838	0.07488
14F166	XUTs	3	3	2	3	-0.884718	0.703153
14F171	XUTs	45	53	64	50	-0.446568	0.358519
14F190	XUTs	0	0	2	0	1.63533	NA
14F20	XUTs	3	0	1	0	-2.19017	NA
14F208	XUTs	8	5	11	7	-0.187069	0.905075
14F214	XUTs	4	4	76	61	3.44449	1.29262e-06
14F219	XUTs	0	0	6	3	3.92127	NA
14F231	XUTs	53	42	172	139	1.06182	0.000833024
14F234	XUTs	0	2	9	6	2.19881	0.291708
14F236	XUTs	16	28	34	31	-0.104172	0.905123
14F238	XUTs	0	0	0	1	0.930898	NA
14F240	XUTs	3	0	2	0	-1.27561	NA
14F255	XUTs	7	3	7	1	-1.0299	0.578995
14F257	XUTs	2	3	24	16	2.3243	0.0467673
14F259	XUTs	34	27	57	25	-0.260998	0.716136
14F269	XUTs	0	0	1	0	0.744495	NA
14F280	XUTs	1	1	10	8	2.51531	0.185403
14F289	XUTs	31	25	94	84	1.02601	0.0177449
14F290	XUTs	25	30	79	45	0.486785	0.393449
14F292	XUTs	0	0	0	0	NA	NA
14F293	XUTs	25	16	91	62	1.24385	0.010258
14F296	XUTs	0	0	9	6	4.67968	0.0482062
14F302	XUTs	5	3	38	29	2.41681	0.00573827
14F303	XUTs	23	23	27	23	-0.533322	0.464699
14F306	XUTs	9	14	36	30	0.854919	0.273785
14F310	XUTs	1	0	2	0	0.236837	NA
14F313	XUTs	5	11	35	21	1.10967	0.21282
14F319	XUTs	14	3	90	77	2.67079	3.17829e-06
14F324	XUTs	4	5	35	49	2.60612	0.00121382
14F37	XUTs	2	7	77	61	3.269	2.55525e-06
14F39	XUTs	2	5	5	3	-0.511568	0.812578
14F52	XUTs	6	8	9	5	-0.689129	0.635942
14F55	XUTs	20	21	114	68	1.4718	0.0012032
14F59	XUTs	7	3	203	126	4.37353	1.03477e-14
14F6	XUTs	11	9	11	10	-0.572426	0.632014
14F61	XUTs	6	4	13	7	0.329353	0.836545
14F67	XUTs	0	0	3	0	2.2198	NA
14F97	XUTs	16	15	15	15	-0.689108	0.444211
14F99	XUTs	2	0	4	2	0.953425	NA
14R1	XUTs	0	0	0	0	NA	NA
14R106	XUTs	2	6	91	66	3.6223	1.93128e-07
14R108	XUTs	1	2	9	5	1.52522	0.44227
14R111	XUTs	0	0	0	0	NA	NA
14R114	XUTs	3	4	10	7	0.606148	0.724596
14R128	XUTs	6	4	23	21	1.50105	0.130717
14R130	XUTs	47	42	76	53	-0.126977	0.827512
14R132	XUTs	0	0	1	3	2.88042	NA
14R136	XUTs	0	1	3	2	1.62399	NA
14R141	XUTs	0	1	45	20	5.31978	0.00290638
14R153	XUTs	1	2	9	9	1.93226	0.270773
14R157	XUTs	0	0	0	0	NA	NA
14R162	XUTs	22	12	352	274	3.55372	4.15676e-27
14R179	XUTs	3	0	5	1	0.328326	0.919654
14R181	XUTs	0	1	10	4	3.0869	0.217393
14R184	XUTs	0	0	0	2	1.95622	NA
14R185	XUTs	2	5	4	3	-0.691014	0.747852
14R187	XUTs	14	9	29	25	0.592828	0.499976
14R192	XUTs	8	0	27	22	2.04847	0.415512
14R194	XUTs	5	3	77	53	3.3632	3.43465e-06
14R195	XUTs	12	8	16	3	-0.792621	0.531377
14R201	XUTs	0	1	3	0	0.749106	NA
14R204	XUTs	12	13	94	112	2.41669	6.06567e-07
14R205	XUTs	0	2	24	7	3.20083	0.0559957
14R21	XUTs	15	17	14	13	-0.898514	0.301795
14R210	XUTs	6	11	42	57	1.91245	0.00503417
14R217	XUTs	1	1	82	66	5.55732	3.85504e-06
14R219	XUTs	20	19	157	163	2.40261	2.14431e-10
14R220	XUTs	3	1	33	7	2.59898	0.0530629
14R223	XUTs	9	10	25	23	0.687249	0.459129
14R229	XUTs	3	0	6	0	0.27302	NA
14R232	XUTs	23	19	33	45	0.279301	0.722627
14R245	XUTs	2	3	3	2	-0.681932	0.791498
14R249	XUTs	8	6	9	3	-0.917421	0.52944
14R250	XUTs	14	7	12	15	-0.242836	0.844126
14R264	XUTs	1	1	25	16	3.68716	0.0132599
14R269	XUTs	20	22	32	26	-0.193761	0.819097
14R271	XUTs	4	4	16	19	1.50228	0.186221
14R284	XUTs	15	13	43	32	0.764064	0.282948
14R286	XUTs	5	3	11	15	1.09576	0.406762
14R291	XUTs	0	0	11	3	4.51911	0.0706236
14R293	XUTs	0	0	0	0	NA	NA
14R300	XUTs	0	1	4	0	1.16437	NA
14R308	XUTs	9	3	171	146	4.08402	1.18174e-14
14R319	XUTs	0	2	12	8	2.61978	0.160189
14R327	XUTs	25	14	287	219	3.04821	3.82877e-20
14R330	XUTs	21	17	51	37	0.554408	0.400533
14R332	XUTs	0	0	1	1	1.80418	NA
14R340	XUTs	0	0	0	0	NA	NA
14R344	XUTs	18	16	47	53	0.928057	0.126917
14R347	XUTs	0	0	0	0	NA	NA
14R348	XUTs	0	0	0	0	NA	NA
14R349	XUTs	0	0	0	0	NA	NA
14R36	XUTs	5	3	96	48	3.48694	1.48005e-06
14R40	XUTs	17	21	78	69	1.29761	0.00867586
14R44	XUTs	1	0	0	1	-0.521888	NA
14R46	XUTs	90	65	139	99	-0.0354799	0.938905
14R72	XUTs	0	2	4	8	1.95183	0.388523
14R74	XUTs	17	18	33	28	0.146599	0.867931
14R75	XUTs	33	35	48	49	-0.130592	0.84511
14R89	XUTs	1	0	5	4	2.52931	0.375952
14R9	XUTs	0	0	1	0	0.744495	NA
14R90	XUTs	2	3	5	2	-0.226598	0.928477
15F1	XUTs	1	6	6	2	-0.566939	0.800317
15F10	XUTs	30	26	326	263	2.74327	1.07124e-21
15F102	XUTs	8	9	17	8	-0.138115	0.919974
15F104	XUTs	1	2	11	5	1.70482	0.365996
15F107	XUTs	5	1	5	9	0.662741	0.735802
15F112	XUTs	12	12	67	82	2.01102	0.000197598
15F116	XUTs	0	0	0	0	NA	NA
15F129	XUTs	10	6	47	22	1.4275	0.0742545
15F14	XUTs	2617	2411	956	717	-2.24702	3.75547e-144
15F141	XUTs	0	1	4	2	1.86919	NA
15F144	XUTs	12	15	34	32	0.637753	0.411954
15F148	XUTs	0	0	1	0	0.744495	NA
15F156	XUTs	25	25	64	35	0.302879	0.660936
15F157	XUTs	0	0	0	0	NA	NA
15F161	XUTs	0	0	0	1	0.930898	NA
15F163	XUTs	2	3	7	6	0.71557	0.71931
15F18	XUTs	145	125	409	336	0.814108	4.28629e-05
15F180	XUTs	0	0	13	10	5.30737	0.0112145
15F197	XUTs	32	18	74	38	0.493883	0.427064
15F200	XUTs	47	52	64	53	-0.417762	0.387513
15F203	XUTs	2	1	11	10	2.17476	0.188087
15F206	XUTs	0	0	0	0	NA	NA
15F21	XUTs	34	36	137	103	1.1154	0.00256712
15F217	XUTs	23	17	282	204	2.9455	4.60922e-19
15F232	XUTs	32	29	37	24	-0.666904	0.27447
15F238	XUTs	2	5	20	10	1.38853	0.282036
15F245	XUTs	3	2	14	6	1.31141	0.414574
15F249	XUTs	1	1	12	3	2.17576	0.305653
15F26	XUTs	0	0	6	5	4.24946	0.105586
15F263	XUTs	0	0	2	1	2.33636	NA
15F265	XUTs	0	0	2	2	2.80424	NA
15F269	XUTs	48	39	212	172	1.49243	4.45526e-07
15F27	XUTs	0	1	7	4	2.76133	0.301163
15F281	XUTs	0	0	0	0	NA	NA
15F286	XUTs	1	0	5	4	2.52931	0.375952
15F288	XUTs	6	4	75	61	3.11813	2.99881e-06
15F296	XUTs	10	9	16	12	-0.0984934	0.938686
15F307	XUTs	54	52	62	56	-0.493806	0.278361
15F309	XUTs	5	4	23	26	1.81982	0.058711
15F312	XUTs	0	0	1	1	1.80418	NA
15F318	XUTs	0	0	0	0	NA	NA
15F33	XUTs	4	4	64	46	3.1192	3.38037e-05
15F331	XUTs	20	19	33	42	0.320285	0.685924
15F345	XUTs	19	16	37	35	0.400623	0.60146
15F381	XUTs	3	3	44	23	2.79532	0.00329695
15F388	XUTs	22	20	86	67	1.20963	0.0107697
15F39	XUTs	4	2	16	6	1.18505	0.440291
15F42	XUTs	1	1	9	5	2.12607	0.311882
15F428	XUTs	0	0	2	0	1.63533	NA
15F431	XUTs	0	1	1	0	-0.747283	NA
15F435	XUTs	0	1	5	4	2.49425	0.380126
15F436	XUTs	30	26	142	103	1.4699	9.15471e-05
15F444	XUTs	12	16	34	32	0.583219	0.459029
15F448	XUTs	8	15	42	19	0.692096	0.429163
15F45	XUTs	2	3	7	8	0.942998	0.605252
15F453	XUTs	3	9	37	37	1.96351	0.014456
15F458	XUTs	2	1	51	50	4.44047	3.25068e-05
15F473	XUTs	0	1	1	0	-0.747283	NA
15F479	XUTs	19	10	29	23	0.20482	0.834419
15F5	XUTs	1	0	5	6	2.84797	0.282345
15F6	XUTs	17	20	51	38	0.599901	0.361389
15F89	XUTs	16	5	14	8	-0.573685	0.646646
15F9	XUTs	10	9	69	46	1.93116	0.00142017
15F94	XUTs	9	8	15	7	-0.314542	0.817921
15R10	XUTs	4	2	13	5	0.898726	0.601449
15R101	XUTs	9	10	32	42	1.33899	0.0707491
15R116	XUTs	2	7	5	1	-1.35013	0.481792
15R12	XUTs	1	0	6	5	2.8206	0.288836
15R137	XUTs	0	0	2	0	1.63533	NA
15R148	XUTs	3	0	7	2	0.921533	0.734048
15R149	XUTs	3	7	12	6	0.134452	0.938459
15R150	XUTs	15	19	88	50	1.33406	0.011912
15R157	XUTs	0	0	0	0	NA	NA
15R162	XUTs	3	1	31	22	3.0786	0.00639942
15R169	XUTs	56	34	151	107	0.868675	0.0164475
15R172	XUTs	3	1	5	5	0.709895	0.760149
15R175	XUTs	11	11	23	13	0.0308507	0.981193
15R177	XUTs	2	3	15	15	1.93779	0.13469
15R178	XUTs	2	3	8	5	0.69382	0.730076
15R185	XUTs	8	4	217	161	4.32339	2.96623e-17
15R187	XUTs	15	5	37	30	1.11716	0.159902
15R189	XUTs	4	1	63	45	3.7828	1.81276e-05
15R19	XUTs	58	28	68	41	-0.309187	0.605283
15R194	XUTs	14	5	59	71	2.17165	0.000353534
15R211	XUTs	8	11	17	17	0.187685	0.874956
15R218	XUTs	1	1	0	1	-1.57867	NA
15R219	XUTs	5	4	17	19	1.3739	0.215215
15R220	XUTs	0	0	1	0	0.744495	NA
15R225	XUTs	0	0	0	0	NA	NA
15R229	XUTs	4	3	3	4	-0.616961	0.776288
15R235	XUTs	6	7	11	7	-0.207332	0.893114
15R243	XUTs	0	0	2	0	1.63533	NA
15R247	XUTs	0	0	1	0	0.744495	NA
15R249	XUTs	113	106	1407	1183	2.9144	1.84931e-84
15R264	XUTs	2	0	0	3	0.149645	NA
15R265	XUTs	15	14	63	55	1.37688	0.0133964
15R284	XUTs	0	0	1	0	0.744495	NA
15R289	XUTs	1	0	7	4	2.79286	0.297664
15R29	XUTs	22	10	22	14	-0.47561	0.621939
15R293	XUTs	3	0	0	1	-2.08523	NA
15R294	XUTs	0	0	0	2	1.95622	NA
15R314	XUTs	16	17	62	43	1.00183	0.088709
15R327	XUTs	5	3	23	21	1.82479	0.0753432
15R33	XUTs	52	30	322	246	2.14527	2.92119e-15
15R34	XUTs	9	9	16	8	-0.271509	0.835929
15R341	XUTs	0	0	1	1	1.80418	NA
15R344	XUTs	6	7	14	5	-0.164024	0.918329
15R346	XUTs	1	0	9	7	3.35367	0.155148
15R355	XUTs	0	1	3	2	1.62399	NA
15R366	XUTs	12	11	14	10	-0.600057	0.58112
15R372	XUTs	10	5	91	54	2.60777	1.48217e-05
15R380	XUTs	2	1	22	20	3.17173	0.0147386
15R385	XUTs	11	6	17	25	0.708984	0.491695
15R399	XUTs	0	1	42	37	5.65366	0.00106814
15R4	XUTs	62	57	207	184	1.06998	0.000158815
15R403	XUTs	2	0	0	0	-3.00444	NA
15R427	XUTs	97	86	204	167	0.368088	0.220443
15R430	XUTs	18	12	55	41	1.02778	0.0969151
15R432	XUTs	55	54	80	59	-0.311248	0.510547
15R433	XUTs	13	11	93	62	2.02601	9.86217e-05
15R440	XUTs	0	1	1	0	-0.747283	NA
15R442	XUTs	20	15	40	25	0.228683	0.792818
15R451	XUTs	0	0	4	6	4.15707	0.123905
15R461	XUTs	1	0	2	2	1.38023	NA
15R466	XUTs	4	4	21	13	1.4134	0.224657
15R47	XUTs	5	4	18	19	1.4093	0.197427
15R471	XUTs	0	0	0	0	NA	NA
15R475	XUTs	0	0	6	1	3.49473	NA
15R477	XUTs	4	7	18	7	0.463446	0.753684
15R485	XUTs	6	3	10	8	0.363686	0.828874
15R486	XUTs	2	2	0	1	-2.60147	NA
15R489	XUTs	0	0	0	0	NA	NA
15R490	XUTs	0	1	0	0	-2.15924	NA
15R491	XUTs	0	0	1	0	0.744495	NA
15R51	XUTs	3	3	35	22	2.57546	0.00938459
15R54	XUTs	2	3	2	0	-2.08203	NA
15R55	XUTs	1	1	1	0	-1.68757	NA
15R56	XUTs	2	3	2	3	-0.633631	0.803761
15R65	XUTs	0	0	10	2	4.28033	0.109327
15R66	XUTs	27	14	81	46	0.968802	0.0805747
15R7	XUTs	8	1	16	9	0.839961	0.56935
15R8	XUTs	65	47	98	74	-0.0314559	0.955306
15R84	XUTs	9	6	98	100	3.09278	1.40712e-08
15R92	XUTs	0	0	2	1	2.33636	NA
15R99	XUTs	8	2	7	4	-0.498485	0.791498
16F1	XUTs	0	1	3	0	0.749106	NA
16F100	XUTs	1	1	4	3	1.14686	0.689762
16F113	XUTs	3	3	4	4	-0.228003	0.92068
16F117	XUTs	6	5	31	21	1.57765	0.0843213
16F13	XUTs	0	0	1	1	1.80418	NA
16F134	XUTs	0	1	2	5	2.2074	NA
16F137	XUTs	4	4	9	7	0.341335	0.84482
16F139	XUTs	2	3	6	3	0.148461	0.952187
16F141	XUTs	1	0	0	3	1.10974	NA
16F145	XUTs	39	36	104	75	0.593542	0.174222
16F148	XUTs	11	10	34	21	0.717466	0.405891
16F151	XUTs	10	10	34	23	0.842897	0.314079
16F155	XUTs	7	3	4	0	-2.04096	0.292492
16F17	XUTs	2	7	27	24	1.82938	0.060665
16F175	XUTs	6	10	21	17	0.577228	0.599275
16F176	XUTs	3	2	11	8	1.2734	0.427492
16F178	XUTs	3	3	20	18	2.01652	0.0767969
16F180	XUTs	181	178	444	485	0.739547	0.000431562
16F182	XUTs	25	37	51	36	-0.190297	0.792174
16F183	XUTs	2	3	61	58	3.92906	4.67866e-06
16F184	XUTs	1	0	3	2	1.67175	NA
16F19	XUTs	1	0	5	8	3.10912	0.215478
16F193	XUTs	0	0	0	1	0.930898	NA
16F197	XUTs	13	4	14	8	-0.27016	0.847322
16F206	XUTs	0	0	0	0	NA	NA
16F208	XUTs	0	0	13	9	5.23512	0.0136067
16F213	XUTs	49	39	62	49	-0.315479	0.555972
16F224	XUTs	1	2	3	2	0.0474976	NA
16F226	XUTs	25	25	163	156	2.03182	1.00998e-08
16F227	XUTs	0	0	18	17	5.92905	0.0019338
16F229	XUTs	3	5	42	28	2.45201	0.00468218
16F233	XUTs	4	6	35	34	2.138	0.00970757
16F236	XUTs	3	3	20	16	1.92973	0.0984739
16F238	XUTs	142	113	180	192	-0.0840746	0.823377
16F24	XUTs	2	0	0	0	-3.00444	NA
16F243	XUTs	15	12	147	105	2.5631	3.25903e-09
16F247	XUTs	173	153	299	285	0.200677	0.451609
16F27	XUTs	8	10	75	47	2.08301	0.00056664
16F272	XUTs	3	2	5	3	0.0153016	0.995231
16F274	XUTs	1	0	0	1	-0.521888	NA
16F28	XUTs	12	14	87	74	1.9765	8.5644e-05
16F280	XUTs	21	15	70	60	1.21017	0.0204058
16F292	XUTs	4	1	12	9	1.43995	0.356007
16F30	XUTs	55	44	126	111	0.616252	0.0965629
16F31	XUTs	10	6	81	77	2.67078	2.60394e-06
16F310	XUTs	10	8	13	9	-0.36945	0.777723
16F311	XUTs	0	0	1	1	1.80418	NA
16F324	XUTs	15	19	104	80	1.7723	0.000110681
16F332	XUTs	2	2	0	2	-1.54331	NA
16F334	XUTs	1	0	2	1	0.918616	NA
16F339	XUTs	0	0	5	0	2.95597	NA
16F348	XUTs	4	2	9	3	0.309321	0.883568
16F35	XUTs	28	20	257	229	2.69934	1.42391e-17
16F353	XUTs	7	7	231	170	4.1804	2.17079e-18
16F356	XUTs	2	0	9	3	1.9149	0.420319
16F36	XUTs	0	0	0	0	NA	NA
16F363	XUTs	1	0	0	0	-2.05985	NA
16F376	XUTs	59	56	102	79	-0.00324409	0.995231
16F377	XUTs	18	29	59	40	0.391232	0.563062
16F383	XUTs	12	12	40	51	1.30095	0.0479728
16F384	XUTs	0	0	2	0	1.63533	NA
16F47	XUTs	25	23	111	126	1.67658	3.57239e-05
16F65	XUTs	23	20	28	39	0.0248959	0.979259
16F73	XUTs	0	0	0	0	NA	NA
16F81	XUTs	2	2	3	3	-0.0577208	0.984905
16F86	XUTs	0	0	0	0	NA	NA
16F88	XUTs	21	17	175	116	2.27206	3.8726e-09
16F95	XUTs	10	16	23	11	-0.318805	0.775831
16F98	XUTs	6	4	9	11	0.384294	0.80686
16R132	XUTs	0	0	0	0	NA	NA
16R143	XUTs	8	6	167	102	3.59308	4.99855e-12
16R144	XUTs	0	0	0	1	0.930898	NA
16R15	XUTs	3	2	18	19	2.26087	0.0584917
16R165	XUTs	2	2	24	12	2.48107	0.0542466
16R166	XUTs	16	17	12	25	-0.433675	0.663036
16R174	XUTs	2	1	25	25	3.42986	0.00560741
16R179	XUTs	0	0	2	1	2.33636	NA
16R18	XUTs	1	0	1	0	-0.666294	NA
16R184	XUTs	26	15	105	86	1.57911	0.000340615
16R190	XUTs	5	2	22	14	1.71023	0.141198
16R192	XUTs	11	6	52	25	1.50206	0.047432
16R201	XUTs	2	1	11	2	1.38763	0.528435
16R204	XUTs	10	2	40	24	1.77081	0.0434448
16R21	XUTs	0	0	0	0	NA	NA
16R218	XUTs	2	1	2	3	0.141685	0.966464
16R225	XUTs	5	3	33	38	2.53143	0.00331981
16R235	XUTs	9	8	16	10	-0.0562597	0.970246
16R239	XUTs	8	5	23	22	1.16038	0.228075
16R25	XUTs	13	7	8	10	-0.761248	0.524326
16R262	XUTs	0	1	4	1	1.56125	NA
16R270	XUTs	11	11	34	44	1.20486	0.0909586
16R274	XUTs	4	3	24	25	2.17761	0.0303061
16R276	XUTs	1	0	0	1	-0.521888	NA
16R278	XUTs	1	11	15	12	0.457368	0.764199
16R283	XUTs	12	15	48	23	0.696253	0.370289
16R288	XUTs	12	18	273	240	3.44419	6.45618e-22
16R29	XUTs	1	1	2	1	-0.100923	NA
16R295	XUTs	5	5	33	29	1.98402	0.0204536
16R299	XUTs	0	1	17	9	4.00556	0.0548926
16R30	XUTs	4	4	5	6	-0.171767	0.930628
16R307	XUTs	2	2	15	6	1.68884	0.295771
16R310	XUTs	10	4	242	160	4.18311	5.21056e-18
16R314	XUTs	11	15	43	39	1.00135	0.141306
16R343	XUTs	6	3	33	33	2.24924	0.00902218
16R346	XUTs	15	7	56	37	1.42856	0.0306377
16R348	XUTs	177	162	362	272	0.244653	0.301255
16R349	XUTs	1	0	4	0	1.22495	NA
16R351	XUTs	5	3	21	18	1.64645	0.128031
16R354	XUTs	25	22	27	14	-0.875458	0.217125
16R359	XUTs	1	2	6	3	0.878635	0.72492
16R363	XUTs	3	0	6	5	1.27572	0.583906
16R364	XUTs	9	7	37	23	1.23946	0.132667
16R366	XUTs	3	6	37	37	2.38909	0.00393819
16R375	XUTs	46	37	127	97	0.778864	0.0393191
16R376	XUTs	6	8	22	12	0.588977	0.619373
16R399	XUTs	14	8	15	12	-0.343417	0.774394
16R402	XUTs	1	0	2	2	1.38023	NA
16R404	XUTs	15	16	17	9	-0.937521	0.293617
16R410	XUTs	4	2	33	33	2.83229	0.00270596
16R419	XUTs	28	20	130	95	1.57458	8.16607e-05
16R422	XUTs	38	37	76	72	0.336272	0.517145
16R425	XUTs	0	0	0	0	NA	NA
16R54	XUTs	15	11	43	39	1.01828	0.130622
16R59	XUTs	0	2	6	4	1.60567	0.521227
16R6	XUTs	5	2	10	8	0.730929	0.664926
16R66	XUTs	0	1	4	0	1.16437	NA
16R67	XUTs	5	5	1	1	-2.97354	0.131829
16R69	XUTs	30	15	57	47	0.574708	0.351752
16R8	XUTs	28	24	68	59	0.641885	0.22341
16R82	XUTs	3	10	29	22	1.28286	0.17843
16R9	XUTs	28	23	124	76	1.30135	0.00205134
16R94	XUTs	2	2	10	8	1.51428	0.366659
16R98	XUTs	1	1	1	0	-1.68757	NA
1F1	XUTs	0	0	3	2	3.0947	NA
1F11	XUTs	1	0	20	13	4.38064	0.0266948
1F12	XUTs	13	11	25	19	0.21933	0.834419
1F14	XUTs	30	29	73	50	0.393512	0.487766
1F15	XUTs	23	11	46	31	0.532563	0.475878
1F23	XUTs	5	3	97	60	3.62692	1.98653e-07
1F25	XUTs	19	16	30	28	0.0874376	0.924492
1F3	XUTs	0	0	0	0	NA	NA
1F32	XUTs	16	9	146	88	2.56073	3.20013e-08
1F4	XUTs	31	36	76	54	0.286499	0.620765
1F60	XUTs	14	13	54	51	1.31738	0.0262565
1F72	XUTs	21	16	39	34	0.337762	0.6659
1F75	XUTs	3	4	49	49	3.16649	8.59993e-05
1F89	XUTs	21	25	68	47	0.649934	0.253699
1F90	XUTs	107	108	194	146	-0.000501699	0.998876
1F93	XUTs	10	10	14	13	-0.214704	0.860452
1R101	XUTs	0	0	0	0	NA	NA
1R103	XUTs	15	8	4	0	-3.22005	0.0159386
1R107	XUTs	1	0	5	2	2.12009	NA
1R108	XUTs	17	24	17	20	-0.79438	0.307598
1R16	XUTs	3	6	26	18	1.60756	0.116466
1R18	XUTs	45	33	271	205	1.95671	4.17354e-12
1R2	XUTs	0	0	1	1	1.80418	NA
1R20	XUTs	1	0	0	0	-2.05985	NA
1R35	XUTs	14	12	17	13	-0.448589	0.668869
1R39	XUTs	1	0	0	1	-0.521888	NA
1R40	XUTs	7	3	8	10	0.246736	0.882292
1R5	XUTs	2	1	3	3	0.378293	0.896132
1R55	XUTs	9	5	8	3	-1.02616	0.481197
1R79	XUTs	0	1	2	3	1.68286	NA
1R80	XUTs	1	5	2	2	-1.27873	0.587468
1R83	XUTs	8	5	12	4	-0.393384	0.804769
1R85	XUTs	2	2	8	3	0.753681	0.737824
1R87	XUTs	7	2	9	11	0.559267	0.727274
1R90	XUTs	3	9	5	1	-1.75708	0.28639
1R91	XUTs	20	18	7	8	-1.97877	0.0161229
1R99	XUTs	2	3	0	0	-4.42952	NA
2F101	XUTs	2	6	19	14	1.3569	0.26007
2F106	XUTs	5	7	36	23	1.61793	0.0603444
2F116	XUTs	18	14	257	180	3.11075	6.4993e-18
2F118	XUTs	3	3	27	10	1.91544	0.112516
2F123	XUTs	0	0	0	0	NA	NA
2F125	XUTs	7	8	47	34	1.76718	0.0142948
2F127	XUTs	1	2	18	14	2.74813	0.0519439
2F132	XUTs	7	6	59	28	2.05271	0.0057974
2F134	XUTs	4	4	68	55	3.28942	6.55414e-06
2F136	XUTs	11	4	72	57	2.46612	7.25557e-05
2F141	XUTs	19	8	37	33	0.750171	0.327559
2F143	XUTs	3	0	12	10	2.26295	0.178477
2F145	XUTs	67	55	96	66	-0.251379	0.584287
2F146	XUTs	33	32	205	153	1.80153	1.73335e-08
2F149	XUTs	12	10	68	56	1.84553	0.00117741
2F150	XUTs	26	25	65	46	0.458045	0.435417
2F154	XUTs	39	27	316	256	2.46849	8.78395e-19
2F158	XUTs	4	3	56	27	2.88047	0.000876486
2F161	XUTs	9	6	467	360	5.13118	1.60321e-33
2F166	XUTs	2	4	63	48	3.54459	1.52967e-05
2F169	XUTs	0	0	0	0	NA	NA
2F170	XUTs	0	0	0	0	NA	NA
2F177	XUTs	55	48	234	179	1.3478	1.49257e-06
2F190	XUTs	33	31	381	355	2.88201	6.14036e-27
2F197	XUTs	17	11	133	133	2.61808	1.08439e-09
2F2	XUTs	0	2	8	4	1.85121	0.423438
2F206	XUTs	16	13	38	31	0.601405	0.424237
2F221	XUTs	7	8	37	29	1.47706	0.0601653
2F225	XUTs	6	5	12	12	0.489589	0.72934
2F240	XUTs	0	0	4	3	3.58919	NA
2F242	XUTs	68	73	576	476	2.24508	8.93587e-29
2F252	XUTs	0	1	3	1	1.25294	NA
2F258	XUTs	2	1	1	2	-0.581528	NA
2F270	XUTs	2	1	5	2	0.5408	0.845525
2F274	XUTs	1	1	3	1	0.289941	NA
2F282	XUTs	78	62	111	79	-0.216644	0.618794
2F291	XUTs	0	0	0	0	NA	NA
2F313	XUTs	2	1	7	5	1.35256	0.526151
2F319	XUTs	0	0	3	1	2.72403	NA
2F32	XUTs	2	1	13	7	2.06683	0.22674
2F340	XUTs	40	32	158	132	1.36295	5.6611e-05
2F43	XUTs	5	3	28	15	1.75338	0.0976486
2F50	XUTs	11	8	84	54	2.19566	0.000118511
2F78	XUTs	12	10	20	21	0.265342	0.806079
2F87	XUTs	13	9	38	21	0.751805	0.370413
2F89	XUTs	0	2	4	1	0.533241	NA
2F91	XUTs	12	6	17	13	0.0984638	0.939048
2F93	XUTs	1	0	16	6	3.75945	0.0878796
2R103	XUTs	0	1	1	3	1.39896	NA
2R109	XUTs	14	7	44	40	1.37063	0.0460679
2R11	XUTs	3	2	8	8	1.04839	0.550625
2R114	XUTs	11	7	52	40	1.70546	0.0104038
2R121	XUTs	4	2	4	4	-0.205936	0.929047
2R127	XUTs	23	19	26	23	-0.422234	0.59431
2R136	XUTs	12	8	19	19	0.296782	0.793376
2R142	XUTs	0	0	0	0	NA	NA
2R154	XUTs	6	5	23	24	1.46317	0.124362
2R166	XUTs	0	1	2	1	0.859968	NA
2R170	XUTs	4	4	30	31	2.29498	0.0109158
2R172	XUTs	3	6	11	7	0.307184	0.854557
2R178	XUTs	5	8	95	70	2.99869	4.03859e-07
2R183	XUTs	3	0	5	11	1.88014	0.329808
2R200	XUTs	1	0	1	7	2.48855	0.408878
2R226	XUTs	10	5	40	21	1.35524	0.109211
2R246	XUTs	0	0	0	2	1.95622	NA
2R256	XUTs	167	150	308	255	0.177483	0.504127
2R264	XUTs	0	0	2	4	3.44038	NA
2R267	XUTs	6	3	8	6	-0.00232077	0.998876
2R271	XUTs	0	0	0	0	NA	NA
2R272	XUTs	0	0	1	2	2.44019	NA
2R288	XUTs	4	3	12	1	0.137167	0.952187
2R296	XUTs	0	0	0	0	NA	NA
2R299	XUTs	7	2	14	13	0.970916	0.46393
2R307	XUTs	17	14	21	11	-0.630417	0.493819
2R31	XUTs	5	8	25	12	0.804119	0.475529
2R314	XUTs	0	0	3	0	2.2198	NA
2R318	XUTs	4	0	37	14	2.9963	0.0136559
2R334	XUTs	5	2	57	47	3.25247	4.5315e-05
2R342	XUTs	66	65	261	194	1.13516	1.53659e-05
2R343	XUTs	29	36	82	59	0.446272	0.392603
2R344	XUTs	8	5	13	22	0.838573	0.459753
2R349	XUTs	3	1	13	10	1.88704	0.217632
2R39	XUTs	3	1	2	2	-0.609523	0.834807
2R43	XUTs	6	9	12	8	-0.267188	0.85113
2R48	XUTs	124	127	187	150	-0.233032	0.453712
2R56	XUTs	3	7	8	6	-0.202538	0.909814
2R58	XUTs	0	0	0	0	NA	NA
2R61	XUTs	0	0	0	0	NA	NA
2R63	XUTs	52	42	59	56	-0.348175	0.496112
2R65	XUTs	130	98	299	190	0.436656	0.102533
2R67	XUTs	0	0	1	1	1.80418	NA
2R74	XUTs	2	0	3	4	1.24185	0.676421
2R82	XUTs	4	2	18	16	1.8694	0.119825
2R85	XUTs	148	132	283	263	0.320943	0.209363
2R86	XUTs	0	0	0	1	0.930898	NA
2R91	XUTs	1	0	6	4	2.66715	0.334035
2R93	XUTs	20	13	29	23	0.0121609	0.992074
3F108	XUTs	21	22	57	39	0.489842	0.443293
3F11	XUTs	3	4	15	9	1.09381	0.436119
3F111	XUTs	1	0	2	1	0.918616	NA
3F12	XUTs	6	7	63	42	2.34254	0.000534867
3F130	XUTs	0	1	0	0	-2.15924	NA
3F132	XUTs	9	13	10	10	-0.794539	0.470543
3F31	XUTs	3	4	10	6	0.508186	0.778704
3F33	XUTs	10	6	12	5	-0.591006	0.671702
3F39	XUTs	0	0	1	2	2.44019	NA
3F45	XUTs	1	0	4	2	1.91351	NA
3F5	XUTs	2	2	2	1	-1.098	NA
3F51	XUTs	4	14	23	15	0.370222	0.761874
3F58	XUTs	49	43	171	105	0.913408	0.00860372
3F6	XUTs	2	0	2	3	0.768795	NA
3F61	XUTs	6	2	22	20	1.76929	0.0963417
3F65	XUTs	7	5	42	35	2.03655	0.00756388
3F70	XUTs	1	2	4	3	0.542205	0.842821
3F71	XUTs	47	43	179	111	1.01593	0.00275181
3F74	XUTs	12	13	55	37	1.20921	0.0593553
3F78	XUTs	15	6	60	53	1.79992	0.00327578
3F82	XUTs	0	0	2	0	1.63533	NA
3F84	XUTs	0	2	0	1	-1.64783	NA
3F92	XUTs	2	2	1	3	-0.583926	0.838754
3F94	XUTs	9	10	11	5	-0.941243	0.429
3F99	XUTs	18	24	53	34	0.369618	0.606215
3R100	XUTs	8	3	45	46	2.42928	0.0011321
3R106	XUTs	23	21	66	50	0.74089	0.180302
3R119	XUTs	5	4	34	37	2.35222	0.00488686
3R124	XUTs	1	0	2	2	1.38023	NA
3R130	XUTs	0	0	0	1	0.930898	NA
3R136	XUTs	13	14	20	12	-0.432681	0.676177
3R144	XUTs	11	8	21	12	0.127491	0.918706
3R147	XUTs	1	0	1	0	-0.666294	NA
3R18	XUTs	0	1	6	2	2.26128	NA
3R28	XUTs	0	1	0	1	-0.60454	NA
3R41	XUTs	0	1	6	7	3.05829	0.22071
3R44	XUTs	47	43	97	98	0.477921	0.266129
3R46	XUTs	34	33	64	58	0.217117	0.720675
3R54	XUTs	1	2	10	9	2.00292	0.242641
3R67	XUTs	10	13	87	63	2.03718	0.00012509
3R8	XUTs	0	0	1	4	3.21751	NA
3R90	XUTs	0	0	0	2	1.95622	NA
4F115	XUTs	33	35	124	67	0.803695	0.0677058
4F117	XUTs	2	2	2	6	0.425821	0.864182
4F127	XUTs	7	8	107	82	2.99597	4.0039e-08
4F132	XUTs	0	0	1	0	0.744495	NA
4F137	XUTs	5	4	30	26	1.99276	0.0283748
4F14	XUTs	3	4	12	6	0.66617	0.695557
4F142	XUTs	9	8	15	10	-0.108672	0.936521
4F148	XUTs	2	0	9	3	1.9149	0.420319
4F160	XUTs	36	33	58	43	-0.109626	0.867454
4F161	XUTs	12	7	13	11	-0.298996	0.817099
4F162	XUTs	19	25	53	32	0.265112	0.725175
4F175	XUTs	48	33	122	87	0.713864	0.0744594
4F180	XUTs	0	0	13	9	5.23512	0.0136067
4F181	XUTs	0	1	7	6	3.03491	0.226064
4F19	XUTs	0	0	0	0	NA	NA
4F193	XUTs	19	17	21	19	-0.494007	0.562758
4F194	XUTs	3	0	1	3	-0.0908963	NA
4F204	XUTs	3	1	10	8	1.53822	0.365907
4F206	XUTs	0	0	0	0	NA	NA
4F207	XUTs	1	0	1	0	-0.666294	NA
4F231	XUTs	1	3	7	2	0.419037	0.866717
4F238	XUTs	3	1	3	3	-0.0251983	0.994342
4F240	XUTs	1	2	19	9	2.51816	0.0950866
4F241	XUTs	2	0	1	0	-1.61077	NA
4F242	XUTs	13	8	108	84	2.54421	3.5748e-07
4F248	XUTs	29	26	72	46	0.432501	0.453712
4F253	XUTs	188	165	406	339	0.427916	0.0359152
4F255	XUTs	88	85	295	222	0.919539	0.000142508
4F267	XUTs	57	59	221	152	1.01677	0.000525739
4F272	XUTs	12	6	95	47	2.30293	0.000113383
4F273	XUTs	3	4	9	10	0.79917	0.616426
4F278	XUTs	13	7	14	16	-0.0286275	0.984102
4F28	XUTs	1	1	0	3	0.0731443	NA
4F285	XUTs	2	4	10	3	0.376936	0.854477
4F288	XUTs	1	0	9	7	3.35367	0.155148
4F293	XUTs	6	12	23	10	0.155304	0.905075
4F297	XUTs	0	0	0	0	NA	NA
4F30	XUTs	39	31	81	59	0.343873	0.517852
4F300	XUTs	14	13	10	9	-1.15564	0.227351
4F303	XUTs	12	10	45	38	1.26821	0.0602107
4F306	XUTs	16	26	33	21	-0.326321	0.700772
4F309	XUTs	2	2	1	7	0.461038	0.856123
4F316	XUTs	1	2	27	10	2.90485	0.0372446
4F32	XUTs	3	1	4	3	0.177623	0.948927
4F321	XUTs	0	0	0	0	NA	NA
4F328	XUTs	3	6	13	8	0.527888	0.736253
4F331	XUTs	0	0	1	0	0.744495	NA
4F339	XUTs	11	9	20	8	-0.207916	0.868802
4F34	XUTs	1	0	1	3	1.45158	NA
4F340	XUTs	1	3	14	8	1.75716	0.26436
4F341	XUTs	28	24	23	23	-0.815758	0.218051
4F342	XUTs	4	1	15	4	1.23155	0.481593
4F348	XUTs	10	16	21	15	-0.210708	0.845555
4F350	XUTs	0	0	1	2	2.44019	NA
4F352	XUTs	0	1	2	0	0.165615	NA
4F354	XUTs	0	2	10	12	2.8041	0.11669
4F361	XUTs	1	1	8	5	2.02746	0.347761
4F376	XUTs	4	7	72	52	2.82411	2.54912e-05
4F377	XUTs	0	0	5	4	3.95678	NA
4F381	XUTs	0	1	1	1	0.316579	NA
4F384	XUTs	10	7	15	15	0.188604	0.882042
4F395	XUTs	24	24	40	17	-0.448734	0.557138
4F416	XUTs	0	0	0	1	0.930898	NA
4F426	XUTs	0	1	10	10	3.67299	0.0952777
4F43	XUTs	21	14	212	146	2.69544	3.93514e-13
4F435	XUTs	8	7	18	10	0.223743	0.866525
4F441	XUTs	1	5	9	12	1.15189	0.459717
4F446	XUTs	13	7	14	8	-0.519817	0.673488
4F447	XUTs	10	8	91	75	2.55654	2.14242e-06
4F448	XUTs	0	0	3	5	3.84278	NA
4F449	XUTs	4	4	31	16	1.86774	0.0666689
4F467	XUTs	23	17	42	30	0.192945	0.813883
4F473	XUTs	0	2	6	2	1.23243	0.670138
4F478	XUTs	12	6	125	97	2.97785	2.86175e-09
4F491	XUTs	3	0	14	15	2.67543	0.074928
4F497	XUTs	6	3	33	28	2.12355	0.0165622
4F50	XUTs	45	38	79	68	0.177981	0.750129
4F500	XUTs	60	58	105	83	0.0151101	0.978715
4F505	XUTs	1	2	50	35	4.15564	0.000158024
4F521	XUTs	0	0	0	0	NA	NA
4F522	XUTs	0	0	0	0	NA	NA
4F523	XUTs	0	0	0	0	NA	NA
4F524	XUTs	27	15	68	61	0.987157	0.0623754
4F526	XUTs	25	24	124	106	1.58096	5.70585e-05
4F529	XUTs	30	23	90	41	0.617987	0.275447
4F531	XUTs	4	2	6	2	-0.271283	0.908229
4F532	XUTs	52	53	114	112	0.463026	0.244497
4F544	XUTs	6	8	21	28	1.18045	0.205526
4F546	XUTs	4	4	3	5	-0.613647	0.760149
4F562	XUTs	6	3	21	11	1.16214	0.33594
4F582	XUTs	4	0	4	1	-0.330441	0.917314
4F592	XUTs	11	8	48	30	1.37189	0.0555132
4F597	XUTs	3	2	21	19	2.36166	0.0417825
4F605	XUTs	8	6	98	64	2.86729	9.26968e-07
4F609	XUTs	1	1	1	3	0.424453	NA
4F617	XUTs	10	7	12	16	0.108363	0.936023
4F622	XUTs	12	7	38	23	1.02145	0.214343
4F626	XUTs	0	0	2	1	2.33636	NA
4F63	XUTs	0	0	0	0	NA	NA
4F639	XUTs	12	11	25	18	0.241469	0.82019
4F642	XUTs	44	33	90	87	0.566253	0.204981
4F643	XUTs	0	1	4	1	1.56125	NA
4F645	XUTs	9	11	67	48	1.85567	0.00197441
4F652	XUTs	0	0	3	1	2.72403	NA
4F655	XUTs	3	4	16	9	1.14832	0.405019
4F66	XUTs	0	0	3	1	2.72403	NA
4F661	XUTs	3	0	12	9	2.18892	0.203746
4F669	XUTs	6	5	54	43	2.48863	0.000513199
4F675	XUTs	10	8	200	121	3.48405	6.50518e-14
4F685	XUTs	41	33	107	56	0.459961	0.355197
4F689	XUTs	3	7	28	19	1.5454	0.118425
4F692	XUTs	0	1	2	2	1.32809	NA
4F697	XUTs	2	3	94	67	4.34407	8.83549e-08
4F700	XUTs	31	30	101	86	0.965241	0.0213104
4F703	XUTs	0	1	1	0	-0.747283	NA
4F705	XUTs	1	2	14	10	2.32458	0.138066
4F707	XUTs	5	8	23	20	1.06319	0.284521
4F709	XUTs	2	5	2	4	-0.857533	0.693299
4F711	XUTs	20	9	6	4	-2.17343	0.0311226
4F87	XUTs	6	1	4	2	-0.855331	0.706144
4F90	XUTs	1	0	1	1	0.382353	NA
4F92	XUTs	2	2	1	0	-2.6809	NA
4R1	XUTs	2	0	3	2	0.712557	NA
4R100	XUTs	12	7	61	54	1.96116	0.00121794
4R104	XUTs	0	1	1	0	-0.747283	NA
4R120	XUTs	0	0	12	8	5.09473	0.0192111
4R125	XUTs	14	7	50	51	1.64451	0.00970757
4R15	XUTs	0	2	4	0	0.14096	NA
4R155	XUTs	18	18	53	48	0.840687	0.158899
4R167	XUTs	0	1	24	11	4.42601	0.0244186
4R172	XUTs	0	0	5	8	4.54032	0.0647698
4R177	XUTs	3	10	89	76	2.99981	6.77783e-07
4R182	XUTs	0	0	8	8	4.80424	0.0371296
4R190	XUTs	21	7	487	345	4.25122	2.17987e-19
4R195	XUTs	0	0	1	0	0.744495	NA
4R200	XUTs	0	0	1	0	0.744495	NA
4R203	XUTs	21	16	73	62	1.22274	0.0165723
4R212	XUTs	27	29	402	268	2.91097	9.70142e-25
4R218	XUTs	31	12	133	99	1.79273	2.69861e-05
4R231	XUTs	2	1	15	11	2.46597	0.106153
4R234	XUTs	6	1	5	6	0.0702864	0.976015
4R237	XUTs	9	8	17	11	0.0527483	0.971139
4R246	XUTs	0	3	0	1	-2.24798	NA
4R252	XUTs	8	14	96	64	2.18237	4.50025e-05
4R253	XUTs	0	0	4	0	2.63442	NA
4R255	XUTs	3	5	84	69	3.60028	2.16351e-07
4R263	XUTs	151	138	348	281	0.468636	0.0335225
4R265	XUTs	24	21	214	149	2.34919	1.09006e-11
4R27	XUTs	8	13	16	11	-0.320605	0.792948
4R274	XUTs	12	8	109	97	2.72474	3.79939e-08
4R283	XUTs	1	1	8	6	2.14764	0.302848
4R298	XUTs	12	10	35	28	0.866595	0.27047
4R303	XUTs	91	75	1329	1030	3.17519	1.09999e-86
4R309	XUTs	0	0	0	0	NA	NA
4R313	XUTs	2	1	4	0	-0.34266	NA
4R327	XUTs	1	2	2	0	-1.37002	NA
4R329	XUTs	24	30	68	34	0.221204	0.758311
4R333	XUTs	1	1	0	0	-3.09137	NA
4R336	XUTs	25	24	36	27	-0.297521	0.694628
4R342	XUTs	3	1	19	15	2.44962	0.0605741
4R346	XUTs	10	4	34	20	1.29217	0.152678
4R364	XUTs	34	16	758	553	4.05938	3.77876e-55
4R365	XUTs	3	1	13	5	1.48875	0.396113
4R370	XUTs	21	12	81	44	1.25233	0.0259103
4R372	XUTs	68	58	124	122	0.327908	0.401866
4R374	XUTs	0	0	1	1	1.80418	NA
4R393	XUTs	63	61	116	87	0.0507442	0.919366
4R40	XUTs	0	0	1	1	1.80418	NA
4R411	XUTs	11	13	5	10	-1.29231	0.224853
4R418	XUTs	1	0	1	0	-0.666294	NA
4R423	XUTs	18	18	47	30	0.424744	0.567308
4R446	XUTs	25	14	52	44	0.663859	0.292581
4R45	XUTs	13	11	43	29	0.921311	0.209064
4R456	XUTs	21	27	83	52	0.81064	0.121563
4R458	XUTs	0	1	2	3	1.68286	NA
4R461	XUTs	3	4	14	15	1.40898	0.263765
4R468	XUTs	0	0	1	0	0.744495	NA
4R483	XUTs	31	15	49	47	0.439738	0.512339
4R486	XUTs	30	20	67	50	0.577068	0.304237
4R488	XUTs	0	0	2	3	3.15701	NA
4R491	XUTs	64	53	48	46	-0.956084	0.0210674
4R506	XUTs	50	38	52	47	-0.470392	0.356863
4R514	XUTs	5	6	25	21	1.40741	0.143611
4R515	XUTs	15	22	56	47	0.812948	0.180082
4R521	XUTs	0	0	0	0	NA	NA
4R527	XUTs	46	45	95	77	0.263124	0.58941
4R529	XUTs	6	2	17	17	1.47305	0.210397
4R535	XUTs	0	1	3	5	2.37644	0.420577
4R546	XUTs	0	2	6	7	2.03158	0.35287
4R548	XUTs	12	10	11	10	-0.710723	0.5195
4R549	XUTs	11	11	11	11	-0.643958	0.562813
4R55	XUTs	52	29	897	782	3.73427	8.6007e-67
4R552	XUTs	12	11	11	6	-1.11205	0.292492
4R56	XUTs	6	2	55	18	2.49147	0.00703859
4R57	XUTs	120	138	229	234	0.199281	0.541721
4R570	XUTs	1	0	4	2	1.91351	NA
4R585	XUTs	8	4	8	2	-0.956963	0.557988
4R592	XUTs	0	0	6	9	4.74205	0.0433004
4R597	XUTs	0	0	0	0	NA	NA
4R599	XUTs	1	2	4	8	1.39146	0.509797
4R608	XUTs	7	4	9	9	0.0857449	0.96108
4R617	XUTs	4	4	24	20	1.80706	0.0771726
4R618	XUTs	0	1	0	0	-2.15924	NA
4R619	XUTs	6	10	36	38	1.56197	0.0380013
4R68	XUTs	1	0	0	0	-2.05985	NA
4R71	XUTs	3	2	8	14	1.54742	0.301255
4R81	XUTs	118	93	880	607	2.15571	3.32428e-36
4R9	XUTs	9	9	159	96	3.14895	1.14751e-10
4R92	XUTs	9	10	20	15	0.216848	0.852371
4R94	XUTs	25	19	65	48	0.706595	0.211353
5F101	XUTs	19	8	18	18	-0.199393	0.855574
5F112	XUTs	4	10	12	7	-0.26628	0.859788
5F115	XUTs	1	0	2	5	2.24788	NA
5F117	XUTs	3	5	1	0	-3.69306	0.138164
5F12	XUTs	13	11	25	21	0.290195	0.776847
5F122	XUTs	6	3	174	133	4.44027	4.21232e-14
5F125	XUTs	6	8	20	21	0.905227	0.370968
5F126	XUTs	5	2	12	18	1.51091	0.231617
5F128	XUTs	456	393	586	523	-0.258848	0.122362
5F129	XUTs	34	24	196	164	1.98948	1.29896e-09
5F136	XUTs	5	5	30	17	1.55234	0.112683
5F139	XUTs	71	60	233	175	0.982888	0.000322338
5F140	XUTs	0	0	0	0	NA	NA
5F151	XUTs	7	4	5	10	-0.133108	0.938905
5F166	XUTs	2	2	28	39	3.45455	0.00112933
5F171	XUTs	8	6	16	19	0.701365	0.532661
5F174	XUTs	1	0	13	10	3.87431	0.069777
5F180	XUTs	7	4	44	20	1.85707	0.0329034
5F185	XUTs	0	0	0	0	NA	NA
5F191	XUTs	37	31	42	51	-0.171685	0.80172
5F195	XUTs	8	9	55	52	2.00876	0.00149663
5F207	XUTs	5	5	42	43	2.45127	0.00138644
5F21	XUTs	8	16	25	10	-0.180632	0.879545
5F213	XUTs	24	28	116	108	1.45834	0.000260627
5F217	XUTs	9	12	81	64	2.12576	9.96827e-05
5F218	XUTs	5	3	6	2	-0.688847	0.734837
5F222	XUTs	0	0	5	1	3.28069	NA
5F223	XUTs	1	1	2	2	0.35816	NA
5F233	XUTs	0	0	1	2	2.44019	NA
5F238	XUTs	6	11	19	17	0.4153	0.721408
5F239	XUTs	32	19	117	100	1.45123	0.000356513
5F24	XUTs	7	14	23	16	0.205061	0.857699
5F248	XUTs	3	2	13	8	1.40577	0.361389
5F255	XUTs	69	60	227	168	0.95651	0.000578895
5F256	XUTs	0	0	1	0	0.744495	NA
5F33	XUTs	0	0	0	0	NA	NA
5F52	XUTs	6	6	11	5	-0.276922	0.863198
5F55	XUTs	2	1	1	3	-0.142708	NA
5F62	XUTs	6	8	23	20	0.960757	0.328641
5F67	XUTs	4	9	43	28	1.76062	0.0280343
5F68	XUTs	4	7	5	0	-1.91391	0.287074
5F7	XUTs	16	13	42	46	0.973506	0.134555
5F75	XUTs	10	14	33	15	0.294751	0.779569
5F90	XUTs	0	0	1	0	0.744495	NA
5F98	XUTs	7	2	32	25	2.02982	0.0285107
5R11	XUTs	58	56	69	48	-0.627551	0.139864
5R111	XUTs	9	15	11	8	-1.01847	0.32689
5R115	XUTs	5	8	39	27	1.66706	0.0398618
5R12	XUTs	10	8	7	4	-1.37811	0.261522
5R126	XUTs	40	18	46	30	-0.254156	0.734953
5R129	XUTs	41	43	139	146	1.12504	0.00125588
5R135	XUTs	1	0	3	0	0.814475	NA
5R139	XUTs	1	0	2	0	0.236837	NA
5R142	XUTs	2	0	1	0	-1.61077	NA
5R144	XUTs	40	31	297	193	2.12148	2.9331e-13
5R148	XUTs	6	5	10	7	-0.0318765	0.986504
5R151	XUTs	4	3	123	82	4.20723	1.0684e-09
5R165	XUTs	0	1	4	6	2.69451	0.321961
5R166	XUTs	7	3	43	35	2.32509	0.00348725
5R168	XUTs	11	7	21	21	0.59454	0.560096
5R182	XUTs	8	7	11	8	-0.317855	0.824694
5R192	XUTs	4	2	9	8	0.872169	0.609744
5R194	XUTs	63	46	174	158	0.968742	0.00179822
5R205	XUTs	0	0	0	0	NA	NA
5R207	XUTs	0	0	0	0	NA	NA
5R211	XUTs	0	1	3	1	1.25294	NA
5R216	XUTs	0	2	5	2	1.0494	0.729783
5R225	XUTs	1	0	39	31	5.47801	0.00178624
5R227	XUTs	0	0	1	2	2.44019	NA
5R230	XUTs	3	2	0	2	-1.85741	0.504127
5R232	XUTs	6	6	12	4	-0.294192	0.856113
5R239	XUTs	0	0	3	2	3.0947	NA
5R245	XUTs	0	0	0	0	NA	NA
5R247	XUTs	2	1	43	25	3.83142	0.000966213
5R26	XUTs	12	10	12	8	-0.799566	0.464132
5R36	XUTs	9	12	9	8	-0.966669	0.384041
5R40	XUTs	4	4	7	8	0.274001	0.879377
5R48	XUTs	0	1	1	0	-0.747283	NA
5R72	XUTs	0	1	13	2	3.13394	0.217952
5R74	XUTs	6	11	57	46	1.93142	0.00301888
5R75	XUTs	25	21	37	50	0.304624	0.681108
5R76	XUTs	38	26	215	171	1.945	6.29808e-10
5R81	XUTs	8	9	18	13	0.199321	0.872844
5R90m	XUTs	16	7	68	61	1.85883	0.00113513
5R93	XUTs	59	64	140	90	0.228181	0.601625
5R97	XUTs	8	12	21	8	-0.181176	0.887116
6F104	XUTs	7	5	10	10	0.105361	0.947832
6F106	XUTs	0	0	8	6	4.5892	0.0575477
6F108	XUTs	0	1	2	1	0.859968	NA
6F13	XUTs	0	0	0	0	NA	NA
6F15	XUTs	0	0	0	0	NA	NA
6F22	XUTs	88	75	273	264	1.08251	1.17339e-05
6F28	XUTs	0	0	0	0	NA	NA
6F34	XUTs	4	6	7	2	-0.878925	0.620765
6F39	XUTs	5	0	13	12	1.7273	0.2515
6F46	XUTs	6	4	13	11	0.622036	0.661587
6F52	XUTs	5	3	3	3	-1.04243	0.598485
6F62	XUTs	7	2	20	24	1.691	0.103273
6F83	XUTs	5	4	11	2	-0.199718	0.919407
6F87	XUTs	1	1	10	7	2.42291	0.214019
6F9	XUTs	0	0	0	0	NA	NA
6R1	XUTs	0	0	0	0	NA	NA
6R108	XUTs	3	0	2	1	-0.613409	NA
6R114	XUTs	0	0	0	0	NA	NA
6R115	XUTs	87	59	280	226	1.14846	5.52066e-06
6R13	XUTs	0	0	0	0	NA	NA
6R17	XUTs	0	0	0	0	NA	NA
6R28	XUTs	2	0	3	0	-0.1299	NA
6R35	XUTs	0	0	0	0	NA	NA
6R39	XUTs	26	20	38	29	-0.109169	0.8936
6R50	XUTs	45	24	53	35	-0.297742	0.651234
6R53	XUTs	1	1	13	10	2.86635	0.100515
6R65	XUTs	15	10	35	22	0.527929	0.545321
6R66	XUTs	5	2	88	69	3.84053	1.16071e-07
6R7	XUTs	0	1	0	0	-2.15924	NA
6R81	XUTs	2	2	111	95	5.03892	4.00273e-09
6R82	XUTs	4	0	3	1	-0.634674	NA
6R86	XUTs	0	0	0	0	NA	NA
6R94	XUTs	1	0	1	1	0.382353	NA
7F110	XUTs	0	0	2	2	2.80424	NA
7F114	XUTs	1	0	0	1	-0.521888	NA
7F126	XUTs	4	7	20	18	1.12636	0.29278
7F130	XUTs	13	5	59	57	2.06644	0.000925542
7F133	XUTs	25	11	556	417	4.10545	4.06379e-42
7F144	XUTs	3	1	2	2	-0.609523	0.834807
7F158	XUTs	37	44	71	52	-0.0662296	0.917232
7F16	XUTs	10	10	21	24	0.538007	0.585746
7F163	XUTs	4	0	0	3	-0.796108	NA
7F17	XUTs	3	0	2	3	0.189351	NA
7F175	XUTs	1	1	5	3	1.32405	0.625358
7F177	XUTs	0	1	0	0	-2.15924	NA
7F185	XUTs	2	3	1	2	-1.36236	0.598485
7F206	XUTs	6	2	37	45	2.75202	0.000996946
7F209	XUTs	1	0	4	0	1.22495	NA
7F211	XUTs	16	10	231	174	3.30875	1.97443e-17
7F213	XUTs	24	13	77	47	1.08579	0.0499978
7F236	XUTs	0	0	5	5	4.12618	0.12814
7F261	XUTs	98	66	302	221	1.02163	3.81057e-05
7F267	XUTs	8	11	45	40	1.50574	0.0278997
7F271	XUTs	4	2	3	2	-0.907744	0.700262
7F276	XUTs	15	6	44	23	1.01206	0.21202
7F281	XUTs	12	7	99	94	2.71191	1.35028e-07
7F283	XUTs	13	16	47	42	0.963636	0.135189
7F291	XUTs	0	0	4	1	3.02913	NA
7F296	XUTs	8	9	14	5	-0.548235	0.685599
7F31	XUTs	23	21	93	70	1.23127	0.00729654
7F311	XUTs	13	12	26	22	0.290519	0.771641
7F323	XUTs	23	19	57	57	0.805499	0.149837
7F324	XUTs	26	32	108	91	1.12053	0.00686821
7F333	XUTs	1	0	9	5	3.13711	0.207068
7F339	XUTs	0	0	0	0	NA	NA
7F347	XUTs	6	5	9	4	-0.445374	0.794225
7F353	XUTs	14	17	9	10	-1.35347	0.12929
7F358	XUTs	1	0	2	2	1.38023	NA
7F36	XUTs	62	37	293	266	1.86401	2.84106e-12
7F362	XUTs	0	0	0	0	NA	NA
7F368	XUTs	3	0	13	7	2.09587	0.237286
7F375	XUTs	12	11	32	28	0.735634	0.362685
7F380	XUTs	17	11	9	5	-1.66039	0.0862632
7F384	XUTs	31	16	25	15	-0.884337	0.224726
7F391	XUTs	1	0	3	1	1.30653	NA
7F393	XUTs	1	0	3	1	1.30653	NA
7F400	XUTs	3	1	6	3	0.512101	0.835741
7F402	XUTs	4	2	13	7	1.07127	0.498279
7F406	XUTs	1	0	4	2	1.91351	NA
7F409	XUTs	4	3	2	2	-1.44346	0.498138
7F413	XUTs	0	0	0	0	NA	NA
7F414	XUTs	5	6	45	43	2.35512	0.00148473
7F426	XUTs	13	19	19	10	-0.838019	0.347977
7F437	XUTs	70	62	111	74	-0.178155	0.700772
7F439	XUTs	72	53	305	244	1.48683	1.7895e-09
7F44	XUTs	39	22	24	28	-0.844225	0.182144
7F447	XUTs	20	22	125	107	1.81308	7.23531e-06
7F455	XUTs	6	2	31	25	2.17308	0.0216158
7F460	XUTs	8	6	69	58	2.53534	4.55623e-05
7F466	XUTs	0	0	0	0	NA	NA
7F469	XUTs	30	27	97	79	0.974463	0.0243295
7F470	XUTs	3	2	22	20	2.43231	0.0330374
7F471	XUTs	1	0	31	20	5.0063	0.00631521
7F475	XUTs	28	30	156	120	1.59029	8.95772e-06
7F478	XUTs	0	3	1	2	-0.67221	NA
7F479	XUTs	1	3	4	1	-0.433282	0.880024
7F48	XUTs	0	0	1	4	3.21751	NA
7F480	XUTs	6	1	4	2	-0.855331	0.706144
7F59	XUTs	5	6	18	10	0.66129	0.61369
7F64	XUTs	2	0	5	8	2.13828	0.331167
7F65	XUTs	0	1	3	3	1.91983	NA
7F7	XUTs	0	0	0	0	NA	NA
7F71	XUTs	1	1	5	7	1.97045	0.370413
7F76	XUTs	16	14	28	27	0.234368	0.80056
7F91	XUTs	0	0	0	0	NA	NA
7F95	XUTs	1	7	8	12	0.663699	0.692365
7R104	XUTs	0	0	1	1	1.80418	NA
7R105	XUTs	6	10	61	46	2.07148	0.00136108
7R114	XUTs	0	2	15	8	2.80734	0.116315
7R116	XUTs	0	1	1	0	-0.747283	NA
7R12	XUTs	1	3	15	15	2.24946	0.0988198
7R123	XUTs	11	8	54	39	1.63558	0.0128254
7R124	XUTs	9	9	14	16	0.103746	0.936098
7R129	XUTs	13	1	50	24	1.77635	0.314274
7R131	XUTs	0	0	1	1	1.80418	NA
7R133	XUTs	30	19	50	35	0.14319	0.849305
7R135	XUTs	7	6	21	14	0.764182	0.495333
7R144	XUTs	37	28	118	73	0.888426	0.0364663
7R159	XUTs	0	0	4	1	3.02913	NA
7R165	XUTs	6	7	9	8	-0.268625	0.859788
7R168	XUTs	3	1	16	12	2.16734	0.123878
7R172	XUTs	8	7	26	20	0.961314	0.307418
7R173	XUTs	36	36	56	39	-0.266321	0.66788
7R174	XUTs	3	4	5	5	-0.137426	0.949451
7R181	XUTs	1	5	16	14	1.64094	0.210145
7R184	XUTs	0	1	4	4	2.33942	NA
7R187	XUTs	5	7	23	28	1.45402	0.113055
7R19	XUTs	5	7	23	17	1.06629	0.30214
7R2	XUTs	1	2	2	0	-1.37002	NA
7R20	XUTs	15	17	78	59	1.43505	0.00551816
7R21	XUTs	0	1	5	2	2.07857	NA
7R213	XUTs	21	12	29	19	-0.11148	0.910485
7R228	XUTs	16	6	36	30	0.9579	0.227949
7R231	XUTs	0	1	2	2	1.32809	NA
7R238	XUTs	21	22	50	34	0.29674	0.687149
7R243	XUTs	107	70	839	716	2.49431	4.7101e-44
7R245	XUTs	62	36	268	244	1.7531	2.18939e-10
7R25	XUTs	1	3	8	12	1.6889	0.296338
7R255	XUTs	2	1	7	3	1.05661	0.661585
7R261	XUTs	4	1	18	13	1.99508	0.127631
7R262	XUTs	22	20	164	105	2.00939	2.34382e-07
7R264	XUTs	37	43	116	88	0.685629	0.092335
7R269	XUTs	15	11	38	28	0.690671	0.370219
7R275	XUTs	6	3	26	27	1.93651	0.0389001
7R276	XUTs	1	0	2	1	0.918616	NA
7R295	XUTs	2	0	9	1	1.6091	0.557574
7R298	XUTs	0	1	16	14	4.2512	0.0338574
7R303	XUTs	0	0	0	0	NA	NA
7R305	XUTs	30	29	47	33	-0.225276	0.748021
7R308	XUTs	0	3	5	4	0.871223	0.736726
7R315	XUTs	33	30	254	185	2.1406	1.36234e-12
7R319	XUTs	7	5	3	0	-2.718	0.129186
7R322	XUTs	19	5	51	33	1.16956	0.109133
7R326	XUTs	1	0	7	5	2.93407	0.25799
7R328	XUTs	2	3	5	2	-0.226598	0.928477
7R336	XUTs	1	1	8	7	2.25865	0.265902
7R340	XUTs	25	22	75	37	0.566721	0.348355
7R348	XUTs	0	0	0	0	NA	NA
7R35	XUTs	0	0	4	3	3.58919	NA
7R360	XUTs	7	2	16	21	1.44894	0.200238
7R365	XUTs	45	38	231	181	1.65832	1.11641e-08
7R374	XUTs	21	18	66	38	0.740187	0.22071
7R383	XUTs	1	0	3	0	0.814475	NA
7R384	XUTs	2	1	1	0	-2.24356	NA
7R404	XUTs	33	29	137	113	1.3612	0.000198747
7R411	XUTs	5	3	18	7	0.953196	0.501493
7R418	XUTs	133	105	142	81	-0.764284	0.00928186
7R42	XUTs	0	0	9	11	5.14167	0.0174025
7R424	XUTs	0	0	0	0	NA	NA
7R426	XUTs	7	3	6	6	-0.352925	0.843929
7R43	XUTs	0	0	6	5	4.24946	0.105586
7R433	XUTs	27	16	41	35	0.185561	0.817921
7R435	XUTs	0	0	2	3	3.15701	NA
7R45	XUTs	1	1	13	8	2.71852	0.13236
7R459	XUTs	52	30	66	48	-0.16987	0.785771
7R460	XUTs	0	0	1	0	0.744495	NA
7R469	XUTs	22	14	47	26	0.35213	0.662892
7R483	XUTs	6	5	10	6	-0.128976	0.938905
7R5	XUTs	10	12	3	5	-2.09172	0.0676783
7R51	XUTs	1	2	8	7	1.65791	0.380959
7R63	XUTs	21	16	244	153	2.7551	2.06777e-14
7R7	XUTs	0	0	1	2	2.44019	NA
7R77	XUTs	16	17	30	24	0.0514888	0.960082
7R88	XUTs	20	10	10	14	-0.921579	0.330889
7R9	XUTs	0	0	0	0	NA	NA
7R93	XUTs	4	14	25	18	0.556566	0.613907
7R97	XUTs	0	0	0	0	NA	NA
8F102	XUTs	2	2	11	7	1.49794	0.375168
8F104	XUTs	24	30	106	85	1.16052	0.00632723
8F113	XUTs	0	0	3	3	3.38921	NA
8F117	XUTs	0	0	5	6	4.27778	0.101244
8F123	XUTs	1	0	3	0	0.814475	NA
8F13	XUTs	0	0	3	1	2.72403	NA
8F130	XUTs	7	8	7	7	-0.748427	0.58633
8F131	XUTs	59	52	544	400	2.42931	2.58643e-29
8F134	XUTs	4	2	9	3	0.309321	0.883568
8F135	XUTs	16	14	45	41	0.875986	0.18069
8F144	XUTs	0	0	0	0	NA	NA
8F158	XUTs	16	21	69	79	1.36338	0.00741395
8F159	XUTs	5	3	27	27	2.12648	0.0245684
8F162	XUTs	0	0	1	1	1.80418	NA
8F165	XUTs	0	0	0	0	NA	NA
8F168	XUTs	9	8	36	24	1.15353	0.158228
8F18	XUTs	0	1	7	4	2.76133	0.301163
8F190	XUTs	0	0	0	0	NA	NA
8F193	XUTs	15	6	16	17	0.0428359	0.975165
8F2	XUTs	86	66	145	104	0.056269	0.900247
8F204	XUTs	15	19	36	22	0.087943	0.925907
8F212	XUTs	4	5	30	11	1.47236	0.181197
8F22	XUTs	1	3	12	10	1.78487	0.250816
8F226	XUTs	1	4	14	15	1.87589	0.162053
8F229	XUTs	1	6	68	44	3.3106	3.25123e-05
8F237	XUTs	42	50	82	79	0.157368	0.777723
8F239	XUTs	1	0	4	1	1.61091	NA
8F245	XUTs	0	0	1	1	1.80418	NA
8F246	XUTs	4	6	7	4	-0.553948	0.754539
8F32	XUTs	0	0	2	2	2.80424	NA
8F36	XUTs	3	1	29	15	2.78888	0.0215196
8F44	XUTs	35	27	508	320	3.07053	1.37748e-30
8F48	XUTs	7	6	9	6	-0.457007	0.767816
8F65	XUTs	11	7	28	15	0.585788	0.57035
8F67	XUTs	19	14	38	29	0.371	0.649341
8F72	XUTs	15	18	34	29	0.274669	0.75142
8F76	XUTs	0	0	11	6	4.84518	0.0344362
8F77	XUTs	18	4	196	151	3.36605	4.90085e-05
8F87	XUTs	16	21	29	28	-0.0300682	0.976015
8F92	XUTs	44	28	88	78	0.569343	0.220679
8R10	XUTs	48	23	65	61	0.205658	0.748152
8R111	XUTs	0	0	3	0	2.2198	NA
8R113	XUTs	7	3	60	55	2.8919	4.01108e-05
8R115	XUTs	16	11	109	73	2.09226	1.46769e-05
8R117	XUTs	9	9	15	16	0.146555	0.907352
8R118	XUTs	6	11	22	10	0.199185	0.877557
8R125	XUTs	7	4	13	10	0.421294	0.776847
8R129	XUTs	0	0	0	0	NA	NA
8R130	XUTs	6	1	143	96	4.4374	6.07784e-11
8R135	XUTs	0	2	15	12	3.0728	0.0667395
8R137	XUTs	2	3	28	13	2.33387	0.048104
8R142	XUTs	1	0	3	0	0.814475	NA
8R157	XUTs	13	20	112	84	1.90046	3.24004e-05
8R16	XUTs	0	0	1	0	0.744495	NA
8R165	XUTs	1	2	5	1	0.244197	0.936622
8R171m	XUTs	7	8	31	34	1.47951	0.062733
8R172	XUTs	16	1	42	27	1.4257	0.469161
8R174	XUTs	42	28	73	55	0.222479	0.709268
8R189	XUTs	23	34	143	111	1.48755	0.000101927
8R190	XUTs	39	50	181	128	1.12332	0.000762519
8R193	XUTs	26	13	157	135	2.26861	5.35378e-09
8R199	XUTs	30	31	25	23	-0.996647	0.0952777
8R214	XUTs	3	5	22	19	1.69627	0.109581
8R216	XUTs	3	2	1	3	-0.894879	0.733252
8R217	XUTs	5	10	84	62	2.61053	1.15642e-05
8R22	XUTs	4	4	10	8	0.513305	0.758838
8R221	XUTs	7	5	22	19	1.13077	0.264998
8R223	XUTs	32	13	23	26	-0.481002	0.557574
8R227	XUTs	5	0	28	28	2.88149	0.00755101
8R234	XUTs	1	3	1	4	-0.278421	0.923225
8R241	XUTs	1	0	10	9	3.61167	0.107089
8R242	XUTs	1	7	48	38	2.74486	0.000991333
8R246	XUTs	0	0	4	6	4.15707	0.123905
8R247	XUTs	30	28	66	65	0.535397	0.309722
8R253	XUTs	1	3	5	5	0.652188	0.779423
8R26	XUTs	26	27	40	42	-0.0105513	0.991472
8R47	XUTs	15	16	11	10	-1.21508	0.169443
8R64	XUTs	14	7	34	35	1.09673	0.149048
8R68	XUTs	15	7	24	8	-0.145829	0.908804
8R76	XUTs	1	4	34	18	2.67276	0.0144266
8R87	XUTs	3	1	44	28	3.5103	0.000762519
8R98	XUTs	12	16	56	28	0.887217	0.207814
9F10	XUTs	40	25	47	43	-0.163261	0.814888
9F104	XUTs	1	1	8	8	2.3618	0.231622
9F108	XUTs	0	0	0	0	NA	NA
9F111	XUTs	17	19	81	46	1.13507	0.037233
9F113	XUTs	44	25	62	47	0.0173037	0.981996
9F117	XUTs	1	1	9	2	1.72337	0.478735
9F120	XUTs	12	11	18	16	-0.0835532	0.94284
9F122	XUTs	1	0	6	6	2.95934	0.2512
9F129	XUTs	3	1	123	84	5.0335	4.74751e-09
9F13	XUTs	6	4	20	10	0.907608	0.467472
9F136	XUTs	26	17	27	29	-0.242726	0.776558
9F138	XUTs	57	48	88	59	-0.177606	0.734837
9F139	XUTs	37	33	90	74	0.576954	0.208108
9F143	XUTs	8	5	33	34	1.73942	0.0297372
9F152	XUTs	5	4	4	2	-1.25967	0.493819
9F159	XUTs	0	2	12	11	2.84875	0.106153
9F171	XUTs	4	2	1	2	-1.58844	0.506071
9F176	XUTs	15	15	14	12	-0.860122	0.340118
9F185	XUTs	0	0	0	0	NA	NA
9F189	XUTs	52	55	119	97	0.356059	0.387876
9F2	XUTs	2526	2336	1323	961	-1.75206	1.01476e-89
9F202	XUTs	5	5	3	1	-2.01711	0.262178
9F207	XUTs	0	0	1	0	0.744495	NA
9F210	XUTs	0	0	0	1	0.930898	NA
9F213	XUTs	34	28	102	79	0.892463	0.0361105
9F220	XUTs	2	0	5	4	1.56346	0.552978
9F25	XUTs	1	0	7	7	3.18084	0.195428
9F29	XUTs	1	1	1	2	-0.0154756	NA
9F31	XUTs	1	0	0	0	-2.05985	NA
9F32	XUTs	3	2	15	5	1.29605	0.427589
9F38	XUTs	11	11	292	239	3.94144	3.80224e-24
9F4	XUTs	414	377	339	245	-1.09853	1.42171e-12
9F43	XUTs	0	0	0	0	NA	NA
9F55	XUTs	8	2	17	10	0.79069	0.564164
9F57	XUTs	1	1	8	7	2.25865	0.265902
9F63	XUTs	0	0	0	0	NA	NA
9F71	XUTs	0	2	7	4	1.73367	0.470394
9F75	XUTs	1	0	1	1	0.382353	NA
9F9	XUTs	13	13	23	15	-0.122868	0.910632
9F90	XUTs	0	0	0	0	NA	NA
9F91	XUTs	2	1	5	4	0.946785	0.700912
9F93	XUTs	0	0	10	12	5.27777	0.0123999
9F96	XUTs	16	14	39	40	0.761829	0.272116
9F98	XUTs	5	6	72	44	2.72097	7.37257e-05
9R104	XUTs	0	0	0	0	NA	NA
9R117	XUTs	2	4	43	39	3.11897	0.000419766
9R118	XUTs	0	0	0	0	NA	NA
9R124	XUTs	1	2	6	7	1.47112	0.467121
9R141	XUTs	0	0	13	9	5.23512	0.0136067
9R145	XUTs	2	2	46	27	3.51284	0.000700752
9R14m	XUTs	0	2	2	0	-0.848584	NA
9R14m2	XUTs	3	1	2	4	0.018588	0.995073
9R150	XUTs	0	0	1	1	1.80418	NA
9R167	XUTs	2	2	95	77	4.77435	5.13619e-08
9R170	XUTs	0	0	4	13	4.97346	0.0297372
9R175	XUTs	8	3	21	20	1.27875	0.21876
9R183	XUTs	1	0	9	5	3.13711	0.207068
9R194	XUTs	1	6	4	4	-0.500043	0.82019
9R2	XUTs	0	0	3	1	2.72403	NA
9R22	XUTs	2	1	3	3	0.378293	0.896132
9R35	XUTs	11	5	25	20	0.856972	0.377565
9R38	XUTs	9	5	9	11	-0.0959463	0.95166
9R40	XUTs	2	0	0	0	-3.00444	NA
9R45	XUTs	2	6	10	7	0.390713	0.825718
9R49	XUTs	3	0	0	0	-3.589	NA
9R51	XUTs	5	4	58	35	2.6974	0.000470564
9R53	XUTs	32	18	82	62	0.881887	0.076599
9R55	XUTs	39	41	18	7	-2.36861	4.20099e-05
9R56	XUTs	8	5	6	10	-0.295655	0.850139
9R63	XUTs	56	61	137	116	0.457099	0.217952
9R77	XUTs	24	24	53	39	0.276062	0.6933
9R84	XUTs	7	11	4	3	-2.0408	0.108107
CUT001	CUTs	23	13	46	31	0.434905	0.541317
CUT002	CUTs	13	11	52	48	1.40683	0.0166807
CUT003	CUTs	15	10	57	50	1.44752	0.0111798
CUT004	CUTs	49	53	138	102	0.559534	0.116198
CUT005	CUTs	3	5	35	33	2.4257	0.00385835
CUT006	CUTs	1	0	4	6	2.71527	0.296797
CUT007	CUTs	1	2	8	4	1.28566	0.530701
CUT008	CUTs	0	2	25	21	3.84513	0.00602853
CUT009	CUTs	25	19	48	35	0.250496	0.721274
CUT010	CUTs	21	11	62	59	1.28105	0.0164705
CUT011	CUTs	17	13	182	139	2.75529	1.04465e-12
CUT012	CUTs	6	6	81	46	2.7137	2.25795e-05
CUT013	CUTs	2	2	59	56	4.19463	4.73999e-06
CUT014	CUTs	32	23	158	116	1.65194	2.91656e-06
CUT015	CUTs	3	3	221	163	5.33059	1.54468e-15
CUT016	CUTs	4	4	66	54	3.24411	6.00103e-06
CUT017	CUTs	27	12	250	193	2.85058	7.51451e-17
CUT018	CUTs	2	2	6	3	0.47273	0.837478
CUT019	CUTs	31	32	201	151	1.81095	1.0494e-08
CUT020	CUTs	4	3	46	36	2.88785	0.000435297
CUT021	CUTs	24	14	346	287	3.403	2.42039e-27
CUT022	CUTs	4	1	51	22	3.17511	0.00108056
CUT023	CUTs	6	6	390	293	5.16266	7.91251e-28
CUT024	CUTs	10	13	129	86	2.54154	4.78645e-08
CUT025	CUTs	56	49	254	185	1.39405	1.74327e-07
CUT026	CUTs	20	12	161	120	2.47275	4.58585e-10
CUT027	CUTs	17	10	124	123	2.5536	3.888e-09
CUT028	CUTs	11	5	169	119	3.50452	3.73424e-13
CUT029	CUTs	12	7	266	227	4.04313	9.42339e-23
CUT030	CUTs	41	54	435	370	2.41652	2.78896e-24
CUT031	CUTs	2	1	32	17	3.34336	0.00615083
CUT032	CUTs	40	36	56	40	-0.334322	0.538986
CUT033	CUTs	2	0	97	69	5.70915	1.24266e-06
CUT034	CUTs	6	2	71	51	3.27057	5.99927e-06
CUT035	CUTs	21	17	50	36	0.510308	0.423881
CUT036	CUTs	0	0	13	8	5.14887	0.0131666
CUT037	CUTs	15	11	70	47	1.49858	0.00637258
CUT038	CUTs	10	7	80	82	2.61168	1.52232e-06
CUT039	CUTs	7	4	217	154	4.4069	4.83089e-17
CUT040	CUTs	9	4	171	114	3.78418	2.95453e-13
CUT041	CUTs	21	20	212	188	2.62973	7.90324e-15
CUT042	CUTs	19	16	260	192	3.0226	1.10793e-18
CUT043	CUTs	3	8	55	57	2.68721	7.93628e-05
CUT044	CUTs	11	8	99	85	2.62093	2.05658e-07
CUT045	CUTs	3	2	18	15	2.06758	0.0831727
CUT046	CUTs	185	174	272	219	-0.213625	0.376293
CUT047	CUTs	20	20	203	140	2.42388	8.79876e-12
CUT048	CUTs	6	9	173	114	3.5748	4.0048e-13
CUT049	CUTs	19	9	349	340	3.97982	4.2632e-30
CUT050	CUTs	12	12	134	80	2.46975	1.07536e-07
CUT051	CUTs	9	7	26	16	0.714764	0.458109
CUT052	CUTs	6	4	11	20	1.03304	0.367551
CUT053	CUTs	0	3	44	28	3.88545	0.000510208
CUT054	CUTs	10	17	83	60	1.71963	0.000860748
CUT055	CUTs	11	14	24	25	0.313941	0.734546
CUT056	CUTs	6	3	11	16	0.977822	0.428354
CUT057	CUTs	2	3	49	37	3.43135	0.000130847
CUT058	CUTs	2	0	111	95	6.03361	1.78967e-07
CUT059	CUTs	11	10	94	65	2.24631	1.27594e-05
CUT060	CUTs	1	1	27	23	3.98467	0.00370453
CUT061	CUTs	74	55	139	104	0.250912	0.513973
CUT062	CUTs	12	6	56	40	1.75571	0.00577318
CUT063	CUTs	11	6	92	75	2.64211	8.42557e-07
CUT064	CUTs	25	26	77	49	0.621126	0.226219
CUT065	CUTs	40	37	125	92	0.824308	0.0252719
CUT066	CUTs	2	0	5	8	2.12517	0.309609
CUT067	CUTs	8	7	106	75	2.92102	6.70383e-08
CUT068	CUTs	0	1	29	17	4.83017	0.00764308
CUT069	CUTs	0	1	24	17	4.67766	0.0109176
CUT070	CUTs	133	128	216	145	-0.210095	0.476776
CUT071	CUTs	3	6	53	40	2.68947	0.000310168
CUT072	CUTs	2	5	28	15	1.90635	0.0668013
CUT073	CUTs	1	0	3	2	1.66097	0.636937
CUT074	CUTs	35	34	69	46	0.0585526	0.92807
CUT075	CUTs	6	4	108	90	3.65038	1.21582e-09
CUT076	CUTs	10	6	90	66	2.62203	2.29261e-06
CUT077	CUTs	41	45	68	42	-0.332141	0.521637
CUT078	CUTs	13	9	168	123	3.05913	1.63889e-12
CUT079	CUTs	1	3	45	25	3.42665	0.00080712
CUT080	CUTs	1	2	75	60	4.82498	1.50257e-06
CUT081	CUTs	5	7	39	29	1.82436	0.0179648
CUT082	CUTs	1	2	40	31	3.89269	0.000451833
CUT083	CUTs	0	0	1	1	1.79329	0.75552
CUT084	CUTs	0	0	0	0	NA	NA
CUT085	CUTs	22	21	83	68	1.14849	0.0118908
CUT086	CUTs	55	39	88	60	-0.0121074	0.984584
CUT087	CUTs	30	28	81	71	0.731258	0.103483
CUT088	CUTs	11	12	134	92	2.61885	9.827e-09
CUT089	CUTs	2	0	2	10	2.07746	0.348278
CUT090	CUTs	211	192	459	342	0.321615	0.0966109
CUT091	CUTs	21	15	31	28	0.0635806	0.943623
CUT092	CUTs	17	13	270	175	3.21393	1.19533e-18
CUT093	CUTs	47	58	185	112	0.806712	0.0154839
CUT094	CUTs	4	1	41	28	3.12602	0.00111504
CUT095	CUTs	6	5	57	43	2.51801	0.00025661
CUT096	CUTs	22	10	26	14	-0.344881	0.71285
CUT097	CUTs	6	3	33	28	2.11248	0.0130175
CUT098	CUTs	10	5	138	95	3.28987	1.5707e-10
CUT099	CUTs	5	4	37	26	2.13672	0.0108677
CUT100	CUTs	6	8	35	36	1.68818	0.0223712
CUT101	CUTs	1	4	42	22	2.96485	0.00268709
CUT102	CUTs	3	4	8	13	0.959054	0.501215
CUT103	CUTs	2	3	42	42	3.4183	0.000151506
CUT104	CUTs	2	0	11	3	2.11249	0.322099
CUT105	CUTs	84	81	162	110	0.0438806	0.917817
CUT106	CUTs	5	11	86	69	2.59845	3.82579e-06
CUT107	CUTs	4	1	12	16	1.88262	0.147306
CUT108	CUTs	10	3	95	56	2.86734	2.61732e-06
CUT109	CUTs	12	11	256	197	3.6336	1.04037e-20
CUT110	CUTs	14	10	82	73	2.04003	4.94644e-05
CUT111	CUTs	3	4	47	36	2.89569	0.000404058
CUT112	CUTs	2	5	94	72	3.89274	3.09839e-08
CUT113	CUTs	36	34	81	84	0.589616	0.181304
CUT114	CUTs	16	7	182	140	3.15042	8.62756e-14
CUT115	CUTs	8	2	74	46	2.91954	2.4549e-05
CUT116	CUTs	1	0	71	52	6.27313	0.000122011
CUT117	CUTs	14	8	985	770	5.655	2.52532e-62
CUT118	CUTs	10	11	107	59	2.28831	1.12946e-05
CUT119	CUTs	5	5	37	38	2.25982	0.00337138
CUT120	CUTs	0	0	6	4	4.08442	0.117637
CUT121	CUTs	3	2	62	53	3.86811	4.73999e-06
CUT122	CUTs	2	0	5	7	2.00154	0.353119
CUT123	CUTs	6	4	20	10	0.897579	0.448652
CUT124	CUTs	6	6	23	18	1.10455	0.250781
CUT125	CUTs	13	12	44	26	0.800247	0.262874
CUT126	CUTs	1	0	7	9	3.37998	0.13252
CUT127	CUTs	14	11	17	14	-0.347814	0.732174
CUT128	CUTs	9	8	11	12	-0.208328	0.869259
CUT129	CUTs	14	9	248	185	3.56989	1.28991e-19
CUT130	CUTs	3	1	17	17	2.4558	0.0486605
CUT131	CUTs	46	43	94	66	0.172285	0.732496
CUT132	CUTs	6	4	75	57	3.05934	3.24025e-06
CUT133	CUTs	9	11	98	74	2.43138	1.74906e-06
CUT134	CUTs	7	3	209	151	4.50386	1.89957e-16
CUT135	CUTs	25	11	563	420	4.10901	6.00816e-43
CUT136	CUTs	11	9	25	11	0.149127	0.898755
CUT137	CUTs	30	10	2900	2083	6.32034	4.25791e-29
CUT138	CUTs	1	1	93	79	5.76773	8.2852e-07
CUT139	CUTs	5	7	20	13	0.769306	0.488377
CUT140	CUTs	3	1	28	19	2.89201	0.0105804
CUT141	CUTs	21	14	23	22	-0.280802	0.74611
CUT142	CUTs	11	10	124	76	2.56845	1.37125e-07
CUT143	CUTs	16	11	229	174	3.23608	1.49798e-17
CUT144	CUTs	87	79	442	391	1.67078	2.66778e-16
CUT145	CUTs	4	4	38	35	2.53509	0.00192913
CUT146	CUTs	39	18	1604	1404	5.08325	4.26576e-49
CUT147	CUTs	35	32	780	535	3.61954	2.00005e-54
CUT148	CUTs	97	65	306	217	1.02661	2.30154e-05
CUT149	CUTs	21	7	173	124	2.75074	4.72805e-11
CUT150	CUTs	114	55	5684	4325	5.24623	2.23071e-37
CUT151	CUTs	17	8	126	105	2.55824	1.1936e-08
CUT152	CUTs	0	1	7	2	2.41533	0.386797
CUT153	CUTs	16	19	83	64	1.3973	0.00346386
CUT154	CUTs	11	8	40	36	1.34972	0.0479555
CUT155	CUTs	5	4	44	35	2.47201	0.0014511
CUT156	CUTs	12	6	108	78	2.70729	1.5153e-07
CUT157	CUTs	0	0	2	0	1.62757	0.809591
CUT158	CUTs	94	84	162	138	0.0933154	0.806069
CUT159	CUTs	5	5	221	155	4.55912	4.81958e-17
CUT160	CUTs	21	9	536	433	4.35688	1.67987e-42
CUT161	CUTs	15	23	41	20	-0.0308109	0.975764
CUT162	CUTs	0	0	1	0	0.734422	0.930812
CUT163	CUTs	19	10	231	150	3.04433	2.16794e-15
CUT164	CUTs	11	8	130	98	2.9203	9.82272e-10
CUT165	CUTs	0	3	16	3	1.85926	0.308469
CUT166	CUTs	14	11	36	13	0.260631	0.794746
CUT167	CUTs	8	5	36	28	1.64187	0.0349212
CUT168	CUTs	1	3	58	38	3.89722	4.11119e-05
CUT169	CUTs	8	2	35	27	1.98927	0.0190617
CUT170	CUTs	1	3	56	39	3.88665	4.33821e-05
CUT171	CUTs	6	3	75	49	3.11349	7.24503e-06
CUT172	CUTs	2	2	18	11	2.17329	0.0993354
CUT173	CUTs	35	26	393	250	2.72062	1.77795e-22
CUT174	CUTs	2	0	23	12	3.4565	0.0232589
CUT175	CUTs	19	6	237	194	3.45808	1.17567e-18
CUT176	CUTs	2	0	35	27	4.30192	0.00124437
CUT177	CUTs	1	1	22	21	3.77545	0.00768423
CUT178	CUTs	6	9	60	33	1.93104	0.00424962
CUT179	CUTs	2	2	117	85	4.98758	4.15072e-09
CUT180	CUTs	4	2	420	295	6.22545	2.75473e-22
CUT181	CUTs	19	16	319	275	3.42839	4.67008e-26
CUT182	CUTs	10	9	147	95	2.99187	2.93668e-10
CUT183	CUTs	1	6	64	38	3.15842	7.63315e-05
CUT184	CUTs	0	2	8	6	2.09803	0.301252
CUT185	CUTs	4	4	6	5	-0.205671	0.9143
CUT186	CUTs	4	4	57	37	2.87448	0.000175478
CUT187	CUTs	1	4	43	43	3.44312	0.000136854
CUT188	CUTs	39	30	530	299	2.89929	1.7037e-27
CUT189	CUTs	18	13	104	66	1.77975	0.000142939
CUT190	CUTs	7	6	119	72	3.19374	1.44719e-08
CUT191	CUTs	17	19	58	40	0.764626	0.19039
CUT192	CUTs	1	0	4	1	1.60147	0.659467
CUT193	CUTs	82	64	101	78	-0.367807	0.317677
CUT194	CUTs	3	4	100	57	3.7952	1.23924e-07
CUT195	CUTs	8	9	17	16	0.296889	0.795364
CUT196	CUTs	2	4	53	49	3.4265	2.6731e-05
CUT197	CUTs	55	38	238	173	1.47966	1.56646e-07
CUT198	CUTs	13	4	109	88	2.88677	3.36832e-08
CUT199	CUTs	9	9	56	34	1.63634	0.0118572
CUT200	CUTs	23	27	189	172	2.1928	5.47506e-11
CUT201	CUTs	1	0	23	18	4.69609	0.0106721
CUT202	CUTs	17	13	48	25	0.595021	0.406365
CUT203	CUTs	0	2	3	3	0.879754	0.766542
CUT204	CUTs	3	2	50	39	3.49194	8.83473e-05
CUT205	CUTs	30	33	159	136	1.56368	3.37692e-06
CUT206	CUTs	27	14	88	80	1.39382	0.00209453
CUT207	CUTs	11	12	98	62	2.11403	3.10086e-05
CUT208	CUTs	11	14	25	16	0.0243214	0.98399
CUT209	CUTs	2	0	10	15	3.05369	0.0654324
CUT210	CUTs	0	1	5	5	2.65473	0.307243
CUT211	CUTs	8	6	101	86	3.08336	1.71152e-08
CUT212	CUTs	8	7	11	4	-0.706959	0.59384
CUT213	CUTs	2	2	37	22	3.19643	0.002537
CUT214	CUTs	14	12	226	133	3.10187	1.36135e-14
CUT215	CUTs	5	4	53	26	2.43747	0.002237
CUT216	CUTs	0	9	125	87	3.78611	0.134583
CUT217	CUTs	6	4	129	74	3.65867	1.73602e-09
CUT218	CUTs	2	5	63	55	3.40767	6.16258e-06
CUT219	CUTs	15	15	47	38	0.83643	0.181312
CUT220	CUTs	9	10	20	21	0.457677	0.647973
CUT221	CUTs	133	99	3103	2362	3.89373	2.30181e-195
CUT222	CUTs	18	1	1628	1154	6.59907	1.92452e-05
CUT223	CUTs	6	5	738	533	6.18184	1.93078e-39
CUT224	CUTs	4	0	6	3	0.533648	0.828255
CUT225	CUTs	1	4	21	14	2.1049	0.0771897
CUT226	CUTs	96	95	1514	1158	3.13787	3.358e-95
CUT227	CUTs	24	20	140	80	1.63591	6.1038e-05
CUT228	CUTs	35	18	111	89	1.26655	0.0019777
CUT229	CUTs	9	7	65	56	2.26348	0.00013628
CUT230	CUTs	0	0	0	1	0.918996	0.913283
CUT231	CUTs	11	5	109	90	2.98492	1.14151e-08
CUT232	CUTs	4	6	7	9	0.0286135	0.988021
CUT233	CUTs	29	18	588	393	3.71083	2.38187e-41
CUT234	CUTs	71	62	136	108	0.211762	0.586014
CUT235	CUTs	187	140	301	209	-0.0263333	0.93395
CUT236	CUTs	8	4	92	85	3.2374	2.95471e-08
CUT237	CUTs	102	87	155	89	-0.315318	0.352849
CUT238	CUTs	0	0	2	0	1.62757	0.809591
CUT239	CUTs	0	0	1	0	0.734422	0.930812
CUT240	CUTs	0	0	1	1	1.79329	0.75552
CUT241	CUTs	8	6	22	14	0.68829	0.514242
CUT242	CUTs	0	0	3	0	2.21202	0.685489
CUT243	CUTs	0	0	0	0	NA	NA
CUT244	CUTs	0	0	1	0	0.734422	0.930812
CUT245	CUTs	1	1	0	0	-3.10182	0.484948
CUT246	CUTs	20	15	310	217	3.24151	2.44807e-22
CUT247	CUTs	25	19	48	41	0.361612	0.578707
CUT248	CUTs	2	3	53	49	3.69336	1.95973e-05
CUT249	CUTs	27	17	129	123	1.87502	1.133e-06
CUT250	CUTs	11	7	76	65	2.31726	2.77788e-05
CUT251	CUTs	5	10	68	42	2.17673	0.000652817
CUT252	CUTs	10	3	26	16	1.03646	0.295684
CUT253	CUTs	13	13	34	28	0.588698	0.440915
CUT254	CUTs	8	5	103	92	3.2564	4.53218e-09
CUT255	CUTs	19	20	113	94	1.74383	2.38552e-05
CUT256	CUTs	6	6	26	20	1.2695	0.16238
CUT257	CUTs	22	23	21	22	-0.719174	0.293721
CUT258	CUTs	1	2	15	6	2.08104	0.197029
CUT259	CUTs	1	1	69	57	5.31647	9.85509e-06
CUT260	CUTs	14	12	144	93	2.51003	1.09003e-08
CUT261	CUTs	1	2	18	16	2.83594	0.0328451
CUT262	CUTs	13	7	173	128	3.24893	2.55887e-13
CUT263	CUTs	23	15	62	52	0.932969	0.079777
CUT264	CUTs	14	18	87	74	1.66361	0.000412379
CUT265	CUTs	11	9	47	28	1.22502	0.0771897
CUT266	CUTs	11	10	26	12	0.156302	0.888139
CUT267	CUTs	9	10	123	76	2.70295	6.76803e-08
CUT268	CUTs	14	10	68	65	1.82462	0.000583633
CUT269	CUTs	14	7	259	200	3.78987	5.12745e-21
CUT270	CUTs	19	17	199	171	2.70357	3.10392e-14
CUT271	CUTs	18	10	87	101	2.12173	8.1413e-06
CUT272	CUTs	10	6	36	34	1.4868	0.0410697
CUT273	CUTs	16	15	274	218	3.32425	1.37903e-21
CUT274	CUTs	6	3	243	183	4.90025	1.70497e-18
CUT275	CUTs	2	3	25	15	2.30683	0.0400201
CUT276	CUTs	10	7	21	13	0.326591	0.772782
CUT277	CUTs	1	1	3	3	0.933538	0.745018
CUT278	CUTs	21	21	316	221	3.00158	1.48379e-21
CUT279	CUTs	19	12	58	45	1.07543	0.0579827
CUT280	CUTs	5	7	106	78	3.26384	1.46356e-08
CUT281	CUTs	100	77	235	176	0.551494	0.0362733
CUT282	CUTs	98	84	153	99	-0.206813	0.567216
CUT283	CUTs	9	13	102	53	2.1119	7.93729e-05
CUT284	CUTs	17	28	65	32	0.391705	0.565053
CUT285	CUTs	3	3	23	9	1.70038	0.16199
CUT286	CUTs	5	4	107	77	3.68381	5.54234e-09
CUT287	CUTs	19	29	41	28	-0.168306	0.827546
CUT288	CUTs	3	1	59	34	3.86007	6.24637e-05
CUT289	CUTs	149	126	201	152	-0.305576	0.247939
CUT290	CUTs	114	97	230	178	0.286726	0.303199
CUT291	CUTs	85	58	143	112	0.177675	0.656063
CUT292	CUTs	53	63	98	62	-0.224998	0.63257
CUT293	CUTs	1	3	37	13	2.90571	0.0115475
CUT294	CUTs	0	4	16	5	1.61231	0.328423
CUT295	CUTs	26	17	395	288	3.32332	6.36544e-29
CUT296	CUTs	4	2	16	18	1.87536	0.101606
CUT297	CUTs	9	11	43	36	1.31382	0.0492152
CUT298	CUTs	2	4	32	26	2.59842	0.00605627
CUT299	CUTs	18	21	118	106	1.86123	4.41106e-06
CUT300	CUTs	14	7	200	149	3.39299	1.38506e-15
CUT301	CUTs	19	31	186	138	2.01383	1.26745e-08
CUT302	CUTs	2	0	7	6	2.08009	0.322099
CUT303	CUTs	40	39	213	143	1.49364	9.84363e-07
CUT304	CUTs	1	3	34	27	3.25365	0.00186393
CUT305	CUTs	5	4	61	52	2.99331	2.04053e-05
CUT306	CUTs	76	66	4141	3241	5.03575	3.65404e-257
CUT307	CUTs	5	0	369	270	6.33238	2.10112e-19
CUT308	CUTs	0	0	103	69	8.18911	3.26741e-07
CUT309	CUTs	4	1	49	39	3.48604	0.000106817
CUT310	CUTs	5	2	105	61	3.88783	4.92012e-08
CUT311	CUTs	10	5	500	343	5.14063	1.00148e-33
CUT312	CUTs	0	5	9	7	0.952102	0.600495
CUT313	CUTs	4	3	58	62	3.46029	4.288e-06
CUT314	CUTs	15	24	67	41	0.770229	0.182687
CUT315	CUTs	0	2	6	6	1.89372	0.377358
CUT316	CUTs	17	9	146	111	2.64649	7.20445e-10
CUT317	CUTs	3	5	46	39	2.74117	0.000478262
CUT318	CUTs	0	1	50	38	5.78793	0.000549675
CUT319	CUTs	7	5	59	32	2.23577	0.00162786
CUT320	CUTs	7	3	150	84	3.86553	8.57385e-11
CUT321	CUTs	5	4	75	50	3.1207	5.9248e-06
CUT322	CUTs	9	6	150	122	3.52191	9.65053e-13
CUT323	CUTs	40	35	126	93	0.877247	0.0167655
CUT324	CUTs	0	0	0	0	NA	NA
CUT325	CUTs	29	36	81	54	0.368161	0.484185
CUT326	CUTs	82	69	173	106	0.205822	0.58591
CUT327	CUTs	3	1	28	13	2.66985	0.0260268
CUT328	CUTs	9	4	63	43	2.36447	0.00034063
CUT329	CUTs	4	1	49	52	3.70574	2.35118e-05
CUT330	CUTs	5	7	134	106	3.65355	1.9114e-11
CUT331	CUTs	10	13	46	33	1.09925	0.0983233
CUT332	CUTs	5	6	94	84	3.3581	1.69685e-08
CUT333	CUTs	8	2	35	19	1.76689	0.0528102
CUT334	CUTs	1	4	14	10	1.56101	0.263437
CUT335	CUTs	7	1	206	135	4.74399	5.52182e-15
CUT336	CUTs	5	7	11	12	0.281808	0.838905
CUT337	CUTs	74	55	1101	806	3.21869	4.98288e-72
CUT338	CUTs	0	0	44	34	7.05906	2.87443e-05
CUT339	CUTs	8	3	12	10	0.363098	0.801994
CUT340	CUTs	24	16	263	189	2.83153	1.49798e-17
CUT341	CUTs	2	0	43	31	4.55036	0.000440759
[truncated: 8,432 more rows]

## Sheet: D) rpb1-84 rrp6∆ vs. rrp6∆
Name	Type	rrp6∆ (YFN543)_rep1_counts	rrp6∆ (YFN543)_rep1_counts	rpb1-84 rrp6∆ (YFN545)_rep1_counts	rpb1-84 rrp6∆ (YFN545)_rep1_counts	Log2(FC) rpb1-84 rrp6∆ vs. rrp6∆	P-adj
10F134	XUTs	40	24	14	22	-0.530157	0.53774
10F136	XUTs	214	247	118	109	-0.757862	0.00426193
10F143	XUTs	4	5	4	1	-0.647804	NA
10F149	XUTs	9	2	3	1	-1.23417	NA
10F15	XUTs	161	143	160	136	0.22307	0.51761
10F151	XUTs	34	26	11	13	-1.04375	0.198586
10F158	XUTs	4	4	6	0	-0.273646	NA
10F170	XUTs	8	3	3	2	-0.88434	NA
10F174	XUTs	3	0	1	1	-0.301785	NA
10F179	XUTs	5	4	7	4	0.526883	NA
10F18	XUTs	0	0	0	2	2.86258	NA
10F183	XUTs	2	3	1	1	-1.05776	NA
10F200	XUTs	3	7	3	7	0.315784	NA
10F203	XUTs	44	41	26	31	-0.295765	0.691205
10F209	XUTs	0	0	0	0	NA	NA
10F213	XUTs	4	4	1	2	-1.11615	NA
10F22	XUTs	1	4	1	0	-2.09768	NA
10F25	XUTs	18	8	11	5	-0.470038	0.740282
10F253	XUTs	5	5	2	2	-1.05487	NA
10F293	XUTs	9	7	3	2	-1.42844	NA
10F300	XUTs	0	0	1	2	3.34991	NA
10F305	XUTs	10	6	4	0	-1.82226	NA
10F310	XUTs	5	6	10	3	0.440585	NA
10F32	XUTs	14	10	3	5	-1.29195	NA
10F321	XUTs	4	10	11	11	0.918816	NA
10F324	XUTs	7	1	0	5	-0.272055	NA
10F326	XUTs	3	5	2	0	-1.82576	NA
10F37	XUTs	5	2	1	1	-1.53552	NA
10F42	XUTs	60	48	48	21	-0.423098	0.508614
10F44	XUTs	49	38	27	26	-0.446143	0.51479
10F48	XUTs	320	318	180	147	-0.706425	0.00116399
10F49	XUTs	156	130	97	76	-0.468681	0.182367
10F50	XUTs	5	2	2	0	-1.62855	NA
10F55	XUTs	151	171	82	59	-0.941761	0.00215655
10F57	XUTs	7	6	7	1	-0.51913	NA
10F6	XUTs	1	6	0	1	-2.51147	NA
10F62	XUTs	40	30	20	14	-0.790651	0.288281
10F65	XUTs	8	6	4	4	-0.536914	NA
10F67	XUTs	2	1	0	0	-2.75605	NA
10F68	XUTs	24	19	6	5	-1.70751	0.0851335
10F73	XUTs	12	11	20	25	1.25574	0.134433
10F76	XUTs	85	69	60	36	-0.440613	0.38354
10F82	XUTs	18	9	0	1	-4.47332	NA
10F85	XUTs	19	15	9	10	-0.563405	0.627978
10F86	XUTs	253	259	192	153	-0.313315	0.250257
10F87	XUTs	56	54	35	18	-0.820257	0.152864
10F9	XUTs	68	78	48	46	-0.368927	0.479724
10R101	XUTs	284	216	125	78	-1.05646	5.38698e-05
10R114	XUTs	42	37	23	16	-0.768633	0.264772
10R116	XUTs	18	18	9	14	-0.351693	0.766741
10R117	XUTs	54	50	37	25	-0.498779	0.410974
10R119	XUTs	3	2	4	1	0.197613	NA
10R125	XUTs	6	2	2	1	-1.17394	NA
10R128	XUTs	113	96	69	43	-0.656579	0.102216
10R131	XUTs	38	42	11	12	-1.52888	0.0245621
10R136	XUTs	38	31	10	7	-1.7693	0.0188637
10R143	XUTs	0	0	0	0	NA	NA
10R155	XUTs	108	86	74	49	-0.410496	0.359558
10R165	XUTs	14	12	3	1	-2.4701	NA
10R181	XUTs	284	246	193	147	-0.38588	0.139078
10R186	XUTs	155	154	180	201	0.583414	0.0438841
10R197	XUTs	34	57	12	6	-2.1046	0.00223662
10R203	XUTs	219	190	145	110	-0.427269	0.142821
10R206	XUTs	54	46	40	22	-0.453321	0.476176
10R209	XUTs	30	30	27	11	-0.439687	0.618299
10R21	XUTs	291	285	239	191	-0.164937	0.561381
10R212	XUTs	55	73	26	22	-1.15795	0.0254169
10R228	XUTs	17	20	12	10	-0.492457	0.654868
10R233	XUTs	51	52	20	21	-1.05886	0.0681278
10R234	XUTs	16	15	6	2	-1.73193	NA
10R237	XUTs	280	237	311	204	0.238678	0.386178
10R242	XUTs	163	146	138	81	-0.258588	0.491377
10R245	XUTs	9	14	3	2	-1.95611	NA
10R248	XUTs	0	0	0	2	2.86258	NA
10R249	XUTs	326	335	266	225	-0.168648	0.530168
10R254	XUTs	95	95	108	71	0.158237	0.739611
10R257	XUTs	4	5	1	4	-0.514594	NA
10R258	XUTs	2	6	1	2	-1.122	NA
10R276	XUTs	460	408	533	524	0.558316	0.00286957
10R284	XUTs	2	3	5	4	1.10263	NA
10R287	XUTs	173	144	117	101	-0.277486	0.441011
10R288	XUTs	34	29	25	41	0.372182	0.637267
10R29	XUTs	57	39	51	38	0.145405	0.843461
10R39	XUTs	156	132	148	124	0.178433	0.639255
10R50	XUTs	4	3	2	3	-0.191636	NA
10R52	XUTs	95	74	94	64	0.150968	0.772605
10R6	XUTs	5	1	0	3	-0.607893	NA
10R61	XUTs	1	0	1	0	0.224894	NA
10R62	XUTs	3	1	0	0	-3.16847	NA
10R63	XUTs	1	1	2	0	0.142199	NA
10R78	XUTs	9	12	4	3	-1.33391	NA
10R84	XUTs	239	214	213	155	-0.0484738	0.904882
10R89	XUTs	8	9	6	3	-0.686256	NA
10R92	XUTs	59	57	33	18	-0.948828	0.0826681
10R93	XUTs	0	1	1	1	1.26444	NA
11F10	XUTs	69	67	74	69	0.339177	0.476952
11F102	XUTs	19	10	6	5	-1.13593	NA
11F103	XUTs	22	19	25	16	0.243926	0.810244
11F113	XUTs	2	5	0	0	-3.99023	NA
11F136	XUTs	3	2	0	0	-3.49508	NA
11F137	XUTs	0	0	0	0	NA	NA
11F153	XUTs	258	253	312	223	0.315486	0.198143
11F155	XUTs	59	48	42	30	-0.320269	0.614375
11F16	XUTs	11	13	21	8	0.483968	0.689301
11F160	XUTs	0	0	0	0	NA	NA
11F176	XUTs	60	71	76	73	0.453508	0.326624
11F183	XUTs	128	123	136	73	-0.0327433	0.953015
11F187	XUTs	12	8	5	4	-0.893018	NA
11F191	XUTs	16	20	10	11	-0.504876	0.654063
11F200	XUTs	347	425	266	222	-0.403546	0.0828896
11F204	XUTs	40	50	34	35	-0.112804	0.893563
11F205	XUTs	1	1	1	0	-0.774431	NA
11F207	XUTs	18	17	4	5	-1.68393	0.133435
11F209	XUTs	23	24	31	16	0.229804	0.812466
11F210	XUTs	22	15	22	18	0.372882	0.704216
11F216	XUTs	3	4	4	3	0.250946	NA
11F230	XUTs	870	831	553	375	-0.628487	3.81999e-05
11F231	XUTs	25	22	15	12	-0.542475	0.56877
11F244	XUTs	44	21	50	33	0.601064	0.36781
11F25	XUTs	470	417	402	307	-0.0686259	0.804219
11F252	XUTs	11	5	4	1	-1.46376	NA
11F258	XUTs	37	56	69	50	0.60329	0.245507
11F259	XUTs	0	0	0	0	NA	NA
11F26	XUTs	196	198	117	83	-0.728741	0.00843784
11F264	XUTs	101	122	129	70	0.0658601	0.907761
11F265	XUTs	0	1	1	0	0.210257	NA
11F27	XUTs	24	40	33	18	-0.0976396	0.92589
11F270	XUTs	33	42	24	19	-0.548378	0.450344
11F272	XUTs	45	54	10	3	-2.70325	0.000105145
11F281	XUTs	0	0	0	0	NA	NA
11F288	XUTs	5	3	1	0	-2.75768	NA
11F290	XUTs	23	11	8	10	-0.630908	0.596771
11F292	XUTs	0	0	0	0	NA	NA
11F298	XUTs	4	1	0	0	-3.4888	NA
11F3	XUTs	26	17	24	18	0.221333	0.829935
11F300	XUTs	1	0	0	0	-1.1707	NA
11F35	XUTs	14	20	22	6	-0.0858836	0.953015
11F36	XUTs	55	47	34	38	-0.224656	0.744595
11F43	XUTs	4	2	3	3	0.274234	NA
11F58	XUTs	59	58	24	27	-0.923248	0.0903199
11F64	XUTs	168	161	121	90	-0.388384	0.238881
11F68	XUTs	33	38	60	61	1.04149	0.0279239
11F77	XUTs	106	146	90	66	-0.442951	0.268653
11F8	XUTs	0	0	0	0	NA	NA
11F84	XUTs	4	3	0	1	-2.50205	NA
11F87	XUTs	45	47	56	50	0.467852	0.388753
11F88	XUTs	47	44	28	26	-0.48759	0.454308
11F90	XUTs	85	94	82	67	-0.0073833	0.990479
11R107	XUTs	120	111	55	36	-1.09753	0.00255375
11R109	XUTs	116	120	77	61	-0.518456	0.171727
11R112	XUTs	18	13	11	8	-0.453023	0.7128
11R114	XUTs	170	174	139	127	-0.105922	0.792029
11R117	XUTs	156	157	151	102	-0.0610879	0.895751
11R12	XUTs	101	129	96	68	-0.240586	0.589809
11R124	XUTs	215	217	198	156	-0.0316275	0.939855
11R125	XUTs	52	61	39	22	-0.653435	0.259103
11R128	XUTs	21	11	2	7	-1.50463	NA
11R13	XUTs	145	162	89	71	-0.684665	0.0325935
11R130	XUTs	38	35	29	23	-0.232864	0.773664
11R134	XUTs	44	36	29	16	-0.592695	0.401868
11R139	XUTs	7	4	1	1	-2.19176	NA
11R142	XUTs	0	0	0	0	NA	NA
11R146	XUTs	3	4	0	2	-1.45198	NA
11R158	XUTs	61	59	30	27	-0.811114	0.127413
11R163	XUTs	26	11	18	10	-0.16197	0.906094
11R166	XUTs	29	26	10	7	-1.44316	0.0858545
11R167	XUTs	6	4	6	2	-0.110017	NA
11R171	XUTs	86	70	22	12	-1.95616	5.528e-05
11R173	XUTs	4	5	2	0	-1.98947	NA
11R192	XUTs	3	2	0	2	-0.950126	NA
11R2	XUTs	11	14	14	14	0.43273	0.711832
11R208	XUTs	0	0	0	0	NA	NA
11R209	XUTs	0	0	0	0	NA	NA
11R223	XUTs	370	454	280	228	-0.441347	0.0478537
11R226	XUTs	171	156	168	138	0.16332	0.648601
11R246	XUTs	3	1	0	0	-3.16847	NA
11R247	XUTs	10	13	8	2	-0.999902	NA
11R249	XUTs	120	97	92	62	-0.247176	0.584201
11R260	XUTs	134	123	76	77	-0.476789	0.206548
11R262	XUTs	92	98	52	43	-0.742239	0.0713505
11R265	XUTs	36	35	45	73	1.04029	0.0494251
11R267	XUTs	15	19	17	18	0.314543	0.769256
11R270	XUTs	0	0	0	0	NA	NA
11R273	XUTs	61	59	51	34	-0.251445	0.680513
11R274	XUTs	3	7	0	3	-1.37875	NA
11R39	XUTs	12	8	6	5	-0.601242	NA
11R48	XUTs	0	0	0	0	NA	NA
11R53	XUTs	0	0	0	0	NA	NA
11R63	XUTs	81	59	52	32	-0.493527	0.355274
11R7	XUTs	0	0	0	0	NA	NA
11R8	XUTs	2	0	1	1	0.283004	NA
11R81	XUTs	20	23	6	1	-2.40864	0.0275399
11R82	XUTs	7	3	4	1	-0.792257	NA
11R92	XUTs	25	13	22	13	0.123452	0.922865
11R94	XUTs	30	30	13	3	-1.69955	0.0459376
11R97	XUTs	0	0	0	0	NA	NA
12F1	XUTs	6	6	6	5	0.133454	NA
12F109	XUTs	99	69	117	62	0.323211	0.49322
12F113	XUTs	12	7	6	2	-1.02895	NA
12F121	XUTs	53	50	49	34	-0.0630474	0.938144
12F134	XUTs	4	4	6	3	0.398535	NA
12F142	XUTs	66	83	31	15	-1.46502	0.00269108
12F150	XUTs	46	36	26	23	-0.479027	0.492353
12F154	XUTs	11	6	6	4	-0.515208	NA
12F157	XUTs	68	85	30	26	-1.19133	0.0104482
12F159	XUTs	6	4	8	4	0.493597	NA
12F16	XUTs	133	116	87	67	-0.438011	0.248704
12F160	XUTs	1	1	1	3	1.3362	NA
12F165	XUTs	249	219	157	103	-0.602525	0.022762
12F180	XUTs	17	26	27	13	0.118836	0.922303
12F184	XUTs	14	11	38	29	1.67706	0.0119089
12F185	XUTs	30	35	29	24	-0.03686	0.9713
12F188	XUTs	3870	3214	668	543	-2.28867	1.36098e-81
12F191	XUTs	81	53	75	48	0.121606	0.852262
12F193	XUTs	71	49	77	49	0.314703	0.563167
12F198	XUTs	27	24	35	25	0.484718	0.515293
12F208	XUTs	275	264	332	260	0.390986	0.0778317
12F209	XUTs	126	102	52	28	-1.27333	0.000855982
12F215	XUTs	3	2	3	6	1.16529	NA
12F216	XUTs	11	7	4	4	-0.89913	NA
12F221	XUTs	20	22	9	14	-0.575961	0.58114
12F231	XUTs	54	74	65	49	0.0837146	0.905514
12F236	XUTs	100	94	62	79	-0.173019	0.746116
12F239	XUTs	0	0	0	0	NA	NA
12F247	XUTs	31	40	24	18	-0.506376	0.501732
12F253	XUTs	39	51	29	30	-0.339224	0.63387
12F257	XUTs	141	167	198	154	0.44644	0.12282
12F270	XUTs	73	65	95	52	0.32428	0.512437
12F272	XUTs	24	26	24	27	0.306215	0.72388
12F287	XUTs	3	1	0	0	-3.16847	NA
12F289	XUTs	17	23	7	11	-0.861974	0.410608
12F293	XUTs	164	171	155	138	0.0701854	0.869875
12F317	XUTs	23	20	10	4	-1.39251	0.160322
12F33	XUTs	0	0	0	0	NA	NA
12F336	XUTs	40	42	42	37	0.208542	0.768326
12F347	XUTs	76	66	46	23	-0.809292	0.106158
12F359	XUTs	41	49	50	25	-0.0360101	0.968953
12F361	XUTs	4	2	1	0	-2.34463	NA
12F375	XUTs	6	3	0	1	-2.8677	NA
12F394	XUTs	7	7	8	3	-0.132886	NA
12F4	XUTs	1	0	3	0	1.71175	NA
12F404	XUTs	336	393	330	261	-0.0478402	0.887553
12F46	XUTs	1	0	0	1	0.367097	NA
12F54	XUTs	118	101	75	50	-0.561956	0.156453
12F56	XUTs	23	25	11	14	-0.659831	0.479055
12F6	XUTs	97	55	93	51	0.157325	0.798635
12F68	XUTs	41	36	31	29	-0.0931079	0.919651
12F70	XUTs	71	70	69	41	-0.119429	0.851835
12F77	XUTs	150	121	126	96	-0.0327029	0.949491
12F82	XUTs	8	5	3	2	-1.12794	NA
12F84	XUTs	129	122	173	217	0.927278	0.00148697
12F85	XUTs	42	34	38	41	0.333095	0.627104
12F86	XUTs	3	3	1	0	-2.34929	NA
12F87	XUTs	2	0	3	0	0.725811	NA
12F9	XUTs	0	1	0	1	0.352612	NA
12F90	XUTs	442	464	320	199	-0.564118	0.00554274
12F94	XUTs	63	50	30	27	-0.722816	0.20142
12F96	XUTs	2	0	2	2	1.28253	NA
12F98	XUTs	307	288	257	171	-0.230115	0.398604
12R107	XUTs	29	26	31	18	0.0714533	0.946642
12R113	XUTs	97	107	75	49	-0.474216	0.263695
12R126	XUTs	13	19	10	14	-0.127494	0.930108
12R135	XUTs	1	2	2	1	0.225409	NA
12R137	XUTs	4	0	0	0	-3.16012	NA
12R141	XUTs	14	16	6	10	-0.611354	0.628301
12R144	XUTs	32	26	45	31	0.63831	0.322506
12R149	XUTs	0	0	0	0	NA	NA
12R16	XUTs	28	21	28	24	0.348494	0.68168
12R162	XUTs	2	5	1	0	-2.57678	NA
12R167	XUTs	2	2	3	0	-0.269065	NA
12R171	XUTs	27	21	36	20	0.457804	0.571053
12R191	XUTs	0	0	0	0	NA	NA
12R197	XUTs	3	3	0	2	-1.22229	NA
12R207	XUTs	49	55	13	15	-1.62134	0.00592858
12R212	XUTs	12	4	11	8	0.504709	NA
12R215	XUTs	9	5	14	2	0.364666	NA
12R220	XUTs	5	1	0	4	-0.183449	NA
12R229	XUTs	53	47	51	37	0.066979	0.933105
12R232	XUTs	12	19	2	3	-2.35797	NA
12R235	XUTs	444	441	456	324	0.0664301	0.807354
12R237	XUTs	801	864	737	670	0.0235643	0.934634
12R239	XUTs	5	7	4	7	0.17574	NA
12R244	XUTs	18	12	4	4	-1.63832	NA
12R249	XUTs	218	208	147	98	-0.552136	0.0456656
12R250	XUTs	26	18	18	7	-0.595089	0.560881
12R257	XUTs	0	1	0	0	-1.18958	NA
12R265	XUTs	13	8	16	9	0.489233	0.70175
12R267	XUTs	2	2	0	0	-3.17624	NA
12R27	XUTs	9	1	4	2	-0.496051	NA
12R287	XUTs	62	51	40	36	-0.307482	0.621713
12R297	XUTs	142	126	70	31	-1.18225	0.00114926
12R299	XUTs	942	1107	1387	1338	0.683391	1.08168e-05
12R3	XUTs	5	3	0	3	-1.04107	NA
12R304	XUTs	7	9	0	0	-5.17818	NA
12R306	XUTs	142	127	74	63	-0.712679	0.0367546
12R31	XUTs	9	2	3	4	-0.35699	NA
12R313	XUTs	0	0	0	0	NA	NA
12R328	XUTs	41	39	30	40	0.0967417	0.915061
12R33	XUTs	12	10	8	3	-0.780031	NA
12R336	XUTs	117	118	121	97	0.148423	0.727561
12R337	XUTs	47	65	53	30	-0.198892	0.771051
12R341	XUTs	27	19	12	27	0.0858686	0.946375
12R346	XUTs	87	88	42	34	-0.946461	0.0254219
12R348	XUTs	40	47	43	37	0.139091	0.855097
12R352	XUTs	411	431	310	253	-0.322944	0.133888
12R354	XUTs	3	1	1	0	-1.76168	NA
12R361	XUTs	118	142	60	48	-1.01249	0.00342715
12R370	XUTs	47	48	46	38	0.0808828	0.920113
12R385	XUTs	60	65	98	73	0.703657	0.0740977
12R387	XUTs	35	23	39	32	0.552686	0.418649
12R389	XUTs	6	8	2	1	-1.98611	NA
12R391	XUTs	3	2	0	1	-2.00619	NA
12R44	XUTs	31	48	27	22	-0.434467	0.559433
12R5	XUTs	0	0	2	1	3.25097	NA
12R50	XUTs	1	3	2	1	-0.190988	NA
12R7	XUTs	1	0	0	0	-1.1707	NA
12R76	XUTs	43	62	30	14	-1.02935	0.0884839
12R85	XUTs	0	0	0	0	NA	NA
12R96	XUTs	12	13	11	5	-0.418523	NA
13F10	XUTs	25	30	20	9	-0.698673	0.42334
13F106	XUTs	54	48	47	40	0.0316523	0.969865
13F112	XUTs	3	1	3	0	-0.263784	NA
13F116	XUTs	12	12	17	10	0.407728	0.737494
13F12	XUTs	4	3	1	1	-1.53979	NA
13F126	XUTs	1	0	0	0	-1.1707	NA
13F129	XUTs	6	12	7	3	-0.629001	NA
13F137	XUTs	107	97	73	61	-0.34656	0.42334
13F14	XUTs	155	117	84	60	-0.66569	0.0597182
13F142	XUTs	6	7	0	2	-2.3682	NA
13F146	XUTs	29	45	29	20	-0.349935	0.658194
13F151	XUTs	43	28	19	13	-0.89876	0.226406
13F153	XUTs	14	15	28	12	0.681398	0.476787
13F160	XUTs	16	15	21	11	0.277285	0.812467
13F161	XUTs	74	75	64	45	-0.202216	0.714229
13F171	XUTs	7	10	3	3	-1.23824	NA
13F174	XUTs	24	59	20	14	-1.04512	0.159408
13F179	XUTs	0	0	0	0	NA	NA
13F184	XUTs	10	18	19	12	0.385107	0.739462
13F191	XUTs	39	36	37	23	-0.0797893	0.932525
13F192	XUTs	11	9	8	6	-0.260498	NA
13F195	XUTs	196	189	142	114	-0.331654	0.28671
13F199	XUTs	3	6	2	2	-0.906876	NA
13F20	XUTs	3	4	2	2	-0.540888	NA
13F201	XUTs	1	2	2	2	0.681896	NA
13F206	XUTs	20	23	23	14	0.0226297	0.984453
13F208	XUTs	18	14	20	6	-0.0958233	0.948186
13F209	XUTs	136	154	324	254	1.24981	2.84858e-09
13F213	XUTs	11	10	6	2	-1.17469	NA
13F214	XUTs	22	19	10	15	-0.420317	0.699413
13F217	XUTs	123	140	232	165	0.841976	0.000851144
13F218	XUTs	14	17	11	7	-0.541657	0.655895
13F221	XUTs	5	11	5	2	-0.975458	NA
13F222	XUTs	43	44	14	8	-1.74187	0.00777187
13F229	XUTs	61	33	71	52	0.642574	0.219071
13F239	XUTs	5	6	5	2	-0.433173	NA
13F247	XUTs	29	17	27	18	0.216919	0.830089
13F256	XUTs	31	35	33	27	0.11969	0.896639
13F259	XUTs	38	32	23	15	-0.63493	0.397075
13F261	XUTs	17	9	5	4	-1.27002	NA
13F272	XUTs	57	37	77	52	0.704752	0.146175
13F274	XUTs	3	2	4	1	0.197613	NA
13F286	XUTs	218	164	64	35	-1.70846	3.46907e-08
13F294	XUTs	124	97	99	76	-0.0809729	0.880711
13F3	XUTs	868	901	497	419	-0.689293	3.34871e-06
13F30	XUTs	16	19	15	8	-0.372948	0.749461
13F315	XUTs	46	38	28	19	-0.589129	0.385481
13F321	XUTs	29	41	37	18	-0.123343	0.900594
13F333	XUTs	78	61	62	40	-0.201231	0.731936
13F337	XUTs	11	7	5	3	-0.925095	NA
13F339	XUTs	99	128	108	100	0.138641	0.767369
13F342	XUTs	4	6	2	3	-0.713526	NA
13F349	XUTs	52	38	36	23	-0.363639	0.602584
13F350	XUTs	55	67	50	35	-0.274056	0.649486
13F354	XUTs	48	39	23	17	-0.867462	0.180108
13F359	XUTs	28	28	21	24	-0.0373298	0.972209
13F364	XUTs	10	5	2	2	-1.63646	NA
13F370	XUTs	336	322	500	343	0.603586	0.00101454
13F373	XUTs	29	26	14	20	-0.403066	0.662167
13F375	XUTs	36	25	38	35	0.527195	0.432575
13F376	XUTs	193	228	157	137	-0.256856	0.424613
13F390	XUTs	22	20	13	15	-0.306687	0.777381
13F393	XUTs	31	29	35	39	0.581323	0.379191
13F398	XUTs	121	92	72	56	-0.477954	0.253534
13F43	XUTs	12	10	6	2	-1.24069	NA
13F5	XUTs	19	11	2	5	-1.79292	NA
13F51	XUTs	72	71	51	44	-0.328995	0.534898
13F52	XUTs	37	37	29	9	-0.75453	0.330485
13F54	XUTs	1	3	1	0	-1.7761	NA
13F59	XUTs	7	3	2	2	-1.04905	NA
13F63	XUTs	6	6	7	4	0.111315	NA
13F65	XUTs	33	46	19	11	-1.15917	0.0928278
13F80	XUTs	113	114	107	81	-0.0188284	0.972209
13F98	XUTs	9	18	6	7	-0.782201	NA
13R108	XUTs	516	434	283	180	-0.793784	5.11466e-05
13R110	XUTs	28	37	35	23	0.0784201	0.937256
13R114	XUTs	64	47	36	35	-0.374464	0.545279
13R117	XUTs	28	32	12	8	-1.33836	0.0928278
13R124	XUTs	21	20	12	14	-0.378792	0.722821
13R127	XUTs	4	6	5	1	-0.547646	NA
13R132	XUTs	102	107	179	133	0.829573	0.00299289
13R134	XUTs	15	20	22	16	0.367593	0.715131
13R14	XUTs	11	12	13	9	0.1832	0.905514
13R147	XUTs	1	1	0	0	-2.17624	NA
13R153	XUTs	234	197	103	78	-0.997122	0.000166431
13R177	XUTs	21	28	46	35	0.976987	0.10134
13R182	XUTs	2	1	0	0	-2.75605	NA
13R183	XUTs	0	4	0	1	-1.68619	NA
13R188	XUTs	0	0	0	0	NA	NA
13R196	XUTs	147	126	105	84	-0.27287	0.476981
13R199	XUTs	6	5	0	1	-3.16634	NA
13R2	XUTs	28	33	42	33	0.552641	0.396587
13R20	XUTs	192	178	155	103	-0.274529	0.407209
13R201	XUTs	4	1	3	0	-0.58004	NA
13R216	XUTs	32	35	24	24	-0.212032	0.807354
13R217	XUTs	63	51	43	26	-0.482382	0.411771
13R228	XUTs	208	220	113	87	-0.84378	0.00132119
13R232	XUTs	10	13	7	7	-0.449063	NA
13R234	XUTs	73	54	54	37	-0.231604	0.704216
13R236	XUTs	12	12	9	4	-0.658536	NA
13R242	XUTs	14	8	7	4	-0.757554	NA
13R245	XUTs	8	7	6	3	-0.504678	NA
13R253	XUTs	41	45	22	22	-0.698861	0.291641
13R255	XUTs	29	28	29	16	-0.105965	0.921117
13R27	XUTs	8	13	3	4	-1.30803	NA
13R272	XUTs	0	0	0	0	NA	NA
13R275	XUTs	50	38	35	33	-0.103599	0.904829
13R276	XUTs	3	5	3	4	0.0911264	NA
13R279	XUTs	164	159	75	52	-1.09775	0.000288987
13R293	XUTs	142	163	162	128	0.182247	0.621225
13R294	XUTs	54	60	29	32	-0.628192	0.276668
13R297	XUTs	10	8	3	4	-1.07974	NA
13R303	XUTs	45	29	16	18	-0.843837	0.253351
13R307	XUTs	70	64	45	25	-0.699763	0.177118
13R313	XUTs	29	27	21	20	-0.182581	0.853796
13R316	XUTs	39	39	35	26	-0.102529	0.908455
13R330	XUTs	129	124	73	55	-0.729677	0.0368235
13R340	XUTs	75	71	115	83	0.689852	0.0576966
13R341	XUTs	102	101	69	53	-0.48042	0.249313
13R356	XUTs	0	0	0	0	NA	NA
13R357	XUTs	12	6	7	9	0.120058	NA
13R362	XUTs	38	29	15	20	-0.649784	0.410974
13R378	XUTs	3	3	1	1	-1.3188	NA
13R385	XUTs	19	20	4	5	-1.8417	0.0833534
13R388	XUTs	7	16	13	4	-0.237769	NA
13R389	XUTs	22	24	15	14	-0.400998	0.68806
13R400	XUTs	14	17	4	5	-1.50959	NA
13R402	XUTs	31	37	10	11	-1.4254	0.0564961
13R411	XUTs	83	81	41	27	-1.02371	0.020282
13R422	XUTs	1	0	1	0	0.224894	NA
13R47	XUTs	92	80	65	56	-0.245452	0.627883
13R52	XUTs	1	2	1	1	-0.320563	NA
13R69	XUTs	5	2	1	0	-2.56411	NA
13R73	XUTs	25	33	25	30	0.203979	0.820781
13R87	XUTs	457	455	329	279	-0.324221	0.119493
13R88	XUTs	8	14	3	6	-0.990838	NA
13R97	XUTs	6	17	10	4	-0.504799	NA
14F101	XUTs	100	64	96	87	0.426497	0.33252
14F102	XUTs	256	237	212	234	0.136225	0.693907
14F115	XUTs	5	3	1	3	-0.675174	NA
14F116	XUTs	10	17	10	1	-1.12334	NA
14F118	XUTs	93	105	100	64	-0.0298923	0.958591
14F123	XUTs	144	132	172	133	0.399227	0.198143
14F126	XUTs	10	20	16	11	0.0909441	0.949879
14F133	XUTs	13	7	19	9	0.712702	0.545861
14F142	XUTs	202	173	134	103	-0.406776	0.18888
14F166	XUTs	15	10	2	3	-2.0391	NA
14F171	XUTs	113	158	64	50	-0.996658	0.00487876
14F190	XUTs	2	2	2	0	-0.842204	NA
14F20	XUTs	1	1	1	0	-0.774431	NA
14F208	XUTs	35	24	11	7	-1.46448	0.0740977
14F214	XUTs	172	153	76	61	-0.98891	0.00106631
14F219	XUTs	2	8	6	3	0.0686753	NA
14F231	XUTs	281	238	172	139	-0.480356	0.0615714
14F234	XUTs	22	16	9	6	-1.09165	0.301734
14F236	XUTs	74	78	34	31	-0.962742	0.0369139
14F238	XUTs	6	6	0	1	-3.29524	NA
14F240	XUTs	7	11	2	0	-2.96946	NA
14F255	XUTs	6	4	7	1	-0.1432	NA
14F257	XUTs	36	37	24	16	-0.621644	0.394246
14F259	XUTs	97	82	57	25	-0.901524	0.0464162
14F269	XUTs	1	1	1	0	-0.774431	NA
14F280	XUTs	8	5	10	8	0.72886	NA
14F289	XUTs	62	68	94	84	0.717	0.063297
14F290	XUTs	72	64	79	45	0.103031	0.873745
14F292	XUTs	0	0	0	0	NA	NA
14F293	XUTs	105	116	91	62	-0.284311	0.506616
14F296	XUTs	10	7	9	6	0.0673989	NA
14F302	XUTs	24	17	38	29	0.964147	0.14933
14F303	XUTs	54	55	27	23	-0.864847	0.122444
14F306	XUTs	44	34	36	30	0.0197328	0.982179
14F310	XUTs	0	1	2	0	1.11981	NA
14F313	XUTs	28	39	35	21	-0.0217099	0.982179
14F319	XUTs	67	61	90	77	0.645471	0.107889
14F324	XUTs	37	28	35	49	0.666442	0.295854
14F37	XUTs	61	72	77	61	0.308252	0.535216
14F39	XUTs	9	12	5	3	-1.15193	NA
14F52	XUTs	39	29	9	5	-2.03619	0.00938748
14F55	XUTs	209	193	114	68	-0.902917	0.00121473
14F59	XUTs	146	116	203	126	0.569429	0.0593444
14F6	XUTs	64	72	11	10	-2.43594	9.32775e-06
14F61	XUTs	23	15	13	7	-0.687857	0.522752
14F67	XUTs	0	0	3	0	3.13884	NA
14F97	XUTs	15	12	15	15	0.424023	0.707027
14F99	XUTs	4	5	4	2	-0.355409	NA
14R1	XUTs	0	3	0	0	-2.77709	NA
14R106	XUTs	102	108	91	66	-0.169396	0.719237
14R108	XUTs	35	27	9	5	-1.90364	0.0197271
14R111	XUTs	0	0	0	0	NA	NA
14R114	XUTs	23	25	10	7	-1.24834	0.170538
14R128	XUTs	7	16	23	21	1.19747	0.175365
14R130	XUTs	108	102	76	53	-0.454117	0.273185
14R132	XUTs	4	1	1	3	0.0152431	NA
14R136	XUTs	8	2	3	2	-0.745137	NA
14R141	XUTs	60	44	45	20	-0.453281	0.485634
14R153	XUTs	9	13	9	9	-0.0219707	NA
14R157	XUTs	3	2	0	0	-3.49508	NA
14R162	XUTs	391	305	352	274	0.103882	0.722608
14R179	XUTs	5	10	5	1	-1.12909	NA
14R181	XUTs	12	6	10	4	-0.140683	NA
14R184	XUTs	3	2	0	2	-0.950126	NA
14R185	XUTs	8	6	4	3	-0.745165	NA
14R187	XUTs	25	36	29	25	0.0830545	0.935458
14R192	XUTs	82	46	27	22	-1.1238	0.0393315
14R194	XUTs	98	52	77	53	0.0446049	0.951633
14R195	XUTs	33	26	16	3	-1.43724	0.101214
14R201	XUTs	0	1	3	0	1.70084	NA
14R204	XUTs	78	114	94	112	0.384346	0.389478
14R205	XUTs	40	40	24	7	-1.15962	0.10539
14R21	XUTs	32	53	14	13	-1.39456	0.0390755
14R210	XUTs	76	62	42	57	-0.18731	0.768913
14R217	XUTs	119	121	82	66	-0.440701	0.251881
14R219	XUTs	370	302	157	163	-0.795081	0.000748176
14R220	XUTs	43	49	33	7	-1.01235	0.158293
14R223	XUTs	47	48	25	23	-0.721089	0.245114
14R229	XUTs	6	4	6	0	-0.588115	NA
14R232	XUTs	84	69	33	45	-0.682478	0.180667
14R245	XUTs	12	28	3	2	-2.75635	0.0224656
14R249	XUTs	10	15	9	3	-0.848273	NA
14R250	XUTs	50	34	12	15	-1.35646	0.0446303
14R264	XUTs	20	23	25	16	0.173487	0.873131
14R269	XUTs	26	39	32	26	0.0905994	0.926419
14R271	XUTs	18	18	16	19	0.240496	0.829237
14R284	XUTs	63	52	43	32	-0.363097	0.542562
14R286	XUTs	19	19	11	15	-0.259904	0.826901
14R291	XUTs	17	20	11	3	-1.19513	0.281309
14R293	XUTs	0	0	0	0	NA	NA
14R300	XUTs	3	2	4	0	-0.176583	NA
14R308	XUTs	262	259	171	146	-0.456052	0.0728269
14R319	XUTs	11	17	12	8	-0.242293	0.866034
14R327	XUTs	310	362	287	219	-0.156864	0.577406
14R330	XUTs	70	76	51	37	-0.480097	0.342408
14R332	XUTs	2	1	1	1	-0.312001	NA
14R340	XUTs	0	0	0	0	NA	NA
14R344	XUTs	70	71	47	53	-0.218086	0.708904
14R347	XUTs	0	0	0	0	NA	NA
14R348	XUTs	0	0	0	0	NA	NA
14R349	XUTs	0	0	0	0	NA	NA
14R36	XUTs	91	125	96	48	-0.360185	0.443003
14R40	XUTs	117	114	78	69	-0.389385	0.333924
14R44	XUTs	3	1	0	1	-1.67214	NA
14R46	XUTs	137	164	139	99	-0.0907969	0.840742
14R72	XUTs	10	8	4	8	-0.275401	NA
14R74	XUTs	52	33	33	28	-0.215486	0.783068
14R75	XUTs	95	85	48	49	-0.620643	0.159654
14R89	XUTs	10	6	5	4	-0.570362	NA
14R9	XUTs	1	0	1	0	0.224894	NA
14R90	XUTs	11	13	5	2	-1.55173	NA
15F1	XUTs	38	25	6	2	-2.74374	0.00251381
15F10	XUTs	339	376	326	263	-0.0230055	0.947485
15F102	XUTs	16	19	17	8	-0.259878	0.836332
15F104	XUTs	15	21	11	5	-0.944225	0.392786
15F107	XUTs	16	18	5	9	-0.983452	0.390385
15F112	XUTs	92	95	67	82	-0.0434015	0.946642
15F116	XUTs	0	1	0	0	-1.18958	NA
15F129	XUTs	38	40	47	22	0.0470584	0.958049
15F14	XUTs	3625	2911	956	717	-1.7119	1.82545e-44
15F141	XUTs	4	2	4	2	0.233145	NA
15F144	XUTs	61	52	34	32	-0.508964	0.383116
15F148	XUTs	1	0	1	0	0.224894	NA
15F156	XUTs	59	54	64	35	0.0431102	0.954725
15F157	XUTs	0	0	0	0	NA	NA
15F161	XUTs	0	3	0	1	-1.26297	NA
15F163	XUTs	6	10	7	6	-0.0421499	NA
15F18	XUTs	655	639	409	336	-0.53775	0.00114237
15F180	XUTs	25	25	13	10	-0.866078	0.333792
15F197	XUTs	82	66	74	38	-0.171044	0.777381
15F200	XUTs	121	97	64	53	-0.637824	0.103818
15F203	XUTs	29	16	11	10	-0.832219	0.396587
15F206	XUTs	0	0	0	0	NA	NA
15F21	XUTs	139	127	137	103	0.104931	0.807653
15F217	XUTs	302	333	282	204	-0.136455	0.638365
15F232	XUTs	80	60	37	24	-0.951353	0.0542786
15F238	XUTs	48	31	20	10	-1.16104	0.098112
15F245	XUTs	20	10	14	6	-0.358932	0.791049
15F249	XUTs	11	15	12	3	-0.597046	NA
15F26	XUTs	5	6	6	5	0.257944	NA
15F263	XUTs	1	1	2	1	0.813126	NA
15F265	XUTs	4	4	2	2	-0.732122	NA
15F269	XUTs	87	115	212	172	1.18308	6.89951e-06
15F27	XUTs	2	6	7	4	0.688945	NA
15F281	XUTs	1	0	0	0	-1.1707	NA
15F286	XUTs	14	4	5	4	-0.735797	NA
15F288	XUTs	108	118	75	61	-0.475874	0.22822
15F296	XUTs	86	63	16	12	-2.15625	2.42909e-05
15F307	XUTs	116	115	62	56	-0.705766	0.0576966
15F309	XUTs	43	47	23	26	-0.601807	0.362997
15F312	XUTs	5	4	1	1	-1.90385	NA
15F318	XUTs	0	0	0	0	NA	NA
15F33	XUTs	79	68	64	46	-0.167187	0.771922
15F331	XUTs	46	42	33	42	0.0559726	0.948859
15F345	XUTs	94	98	37	35	-1.15048	0.00440979
15F381	XUTs	84	67	44	23	-0.937042	0.0510989
15F388	XUTs	126	88	86	67	-0.226615	0.633987
15F39	XUTs	25	20	16	6	-0.812913	0.408472
15F42	XUTs	20	26	9	5	-1.47836	0.118675
15F428	XUTs	2	1	2	0	-0.430388	NA
15F431	XUTs	1	2	1	0	-1.36096	NA
15F435	XUTs	4	2	5	4	0.845428	NA
15F436	XUTs	163	138	142	103	-0.0453976	0.926316
15F444	XUTs	74	71	34	32	-0.870172	0.0681278
15F448	XUTs	75	61	42	19	-0.929184	0.0736043
15F45	XUTs	18	13	7	8	-0.769756	0.517668
15F453	XUTs	75	49	37	37	-0.471835	0.417855
15F458	XUTs	144	93	51	50	-0.958906	0.014545
15F473	XUTs	3	6	1	0	-2.93513	NA
15F479	XUTs	42	31	29	23	-0.23138	0.778546
15F5	XUTs	12	4	5	6	-0.253203	NA
15F6	XUTs	82	64	51	38	-0.460046	0.37022
15F89	XUTs	9	15	14	8	0.107671	0.946642
15F9	XUTs	59	59	69	46	0.208146	0.719183
15F94	XUTs	19	26	15	7	-0.8062	0.408112
15R10	XUTs	9	5	13	5	0.578469	NA
15R101	XUTs	53	45	32	42	-0.116611	0.8867
15R116	XUTs	30	25	5	1	-2.97184	0.00335066
15R12	XUTs	6	1	6	5	0.919906	NA
15R137	XUTs	3	0	2	0	-0.428172	NA
15R148	XUTs	4	6	7	2	0.046373	NA
15R149	XUTs	9	10	12	6	0.150303	NA
15R150	XUTs	138	98	88	50	-0.535854	0.193786
15R157	XUTs	1	2	0	0	-2.76634	NA
15R162	XUTs	43	30	31	22	-0.210094	0.801984
15R169	XUTs	195	195	151	107	-0.346956	0.261884
15R172	XUTs	11	15	5	5	-1.11347	NA
15R175	XUTs	33	29	23	13	-0.546012	0.500879
15R177	XUTs	21	12	15	15	0.136481	0.920147
15R178	XUTs	17	18	8	5	-1.1849	0.282668
15R185	XUTs	245	216	217	161	-0.0336948	0.935458
15R187	XUTs	23	54	37	30	0.0513445	0.957798
15R189	XUTs	80	75	63	45	-0.270972	0.603909
15R19	XUTs	141	129	68	41	-1.06665	0.00163238
15R194	XUTs	84	84	59	71	-0.0870642	0.892588
15R211	XUTs	21	16	17	17	0.150015	0.904643
15R218	XUTs	4	4	0	1	-2.70051	NA
15R219	XUTs	47	32	17	19	-0.856561	0.22369
15R220	XUTs	0	1	1	0	0.210257	NA
15R225	XUTs	1	0	0	0	-1.1707	NA
15R229	XUTs	4	3	3	4	0.289215	NA
15R235	XUTs	13	23	11	7	-0.759841	0.492353
15R243	XUTs	3	3	2	0	-1.4156	NA
15R247	XUTs	2	2	1	0	-1.76848	NA
15R249	XUTs	594	574	1407	1183	1.41052	5.42325e-30
15R264	XUTs	4	4	0	3	-1.04534	NA
15R265	XUTs	82	110	63	55	-0.442516	0.333704
15R284	XUTs	3	2	1	0	-2.08534	NA
15R289	XUTs	9	10	7	4	-0.550831	NA
15R29	XUTs	29	22	22	14	-0.257381	0.796519
15R293	XUTs	1	3	0	1	-1.68677	NA
15R294	XUTs	0	2	0	2	0.384802	NA
15R314	XUTs	59	53	62	43	0.155379	0.807354
15R327	XUTs	58	38	23	21	-0.858973	0.171809
15R33	XUTs	325	297	322	246	0.123299	0.656562
15R34	XUTs	20	29	16	8	-0.800657	0.389763
15R341	XUTs	2	4	1	1	-1.32334	NA
15R344	XUTs	30	26	14	5	-1.33858	0.117618
15R346	XUTs	31	20	9	7	-1.41458	0.11325
15R355	XUTs	6	2	3	2	-0.425127	NA
15R366	XUTs	19	20	14	10	-0.45068	0.675454
15R372	XUTs	95	94	91	54	-0.14388	0.785097
15R380	XUTs	59	45	22	20	-1.04333	0.0723885
15R385	XUTs	34	21	17	25	-0.0913312	0.937477
15R399	XUTs	54	32	42	37	0.143814	0.857185
15R4	XUTs	132	169	207	184	0.640226	0.0190666
15R403	XUTs	0	0	0	0	NA	NA
15R427	XUTs	211	206	204	167	0.0897917	0.801158
15R430	XUTs	96	82	55	41	-0.637241	0.142796
15R432	XUTs	107	76	80	59	-0.142881	0.793689
15R433	XUTs	59	44	93	62	0.83599	0.047349
15R440	XUTs	3	2	1	0	-2.08534	NA
15R442	XUTs	53	58	40	25	-0.530079	0.366851
15R451	XUTs	4	2	4	6	1.03814	NA
15R461	XUTs	3	1	2	2	0.276252	NA
15R466	XUTs	30	22	21	13	-0.369007	0.696926
15R47	XUTs	38	44	18	19	-0.878044	0.192962
15R471	XUTs	0	0	0	0	NA	NA
15R475	XUTs	3	8	6	1	-0.475038	NA
15R477	XUTs	17	10	18	7	0.106691	0.945298
15R485	XUTs	11	9	10	8	0.105804	NA
15R486	XUTs	7	6	0	1	-3.41124	NA
15R489	XUTs	1	0	0	0	-1.1707	NA
15R490	XUTs	0	0	0	0	NA	NA
15R491	XUTs	0	0	1	0	1.65689	NA
15R51	XUTs	24	30	35	22	0.318286	0.700337
15R54	XUTs	3	6	2	0	-1.99361	NA
15R55	XUTs	1	0	1	0	0.224894	NA
15R56	XUTs	4	6	2	3	-0.713526	NA
15R65	XUTs	7	8	10	2	-0.1362	NA
15R66	XUTs	152	158	81	46	-1.04991	0.00100205
15R7	XUTs	17	20	16	9	-0.329993	0.776032
15R8	XUTs	168	202	98	74	-0.85335	0.00334433
15R84	XUTs	263	206	98	100	-0.970981	0.00033889
15R92	XUTs	0	0	2	1	3.25097	NA
15R99	XUTs	8	14	7	4	-0.765085	NA
16F1	XUTs	2	2	3	0	-0.269065	NA
16F100	XUTs	9	9	4	3	-1.10957	NA
16F113	XUTs	8	5	4	4	-0.428539	NA
16F117	XUTs	33	30	31	21	-0.0295664	0.97613
16F13	XUTs	6	1	1	1	-1.53082	NA
16F134	XUTs	15	19	2	5	-1.9824	NA
16F137	XUTs	18	15	9	7	-0.788356	0.485743
16F139	XUTs	5	6	6	3	-0.0607924	NA
16F141	XUTs	1	1	0	3	0.985152	NA
16F145	XUTs	272	240	104	75	-1.26449	2.23354e-07
16F148	XUTs	24	35	34	21	0.136974	0.888921
16F151	XUTs	66	59	34	23	-0.884654	0.0876359
16F155	XUTs	3	1	4	0	0.143742	NA
16F17	XUTs	53	45	27	24	-0.679002	0.269551
16F175	XUTs	29	27	21	17	-0.301825	0.739515
16F176	XUTs	13	18	11	8	-0.457347	0.710846
16F178	XUTs	24	37	20	18	-0.422379	0.627104
16F180	XUTs	1002	961	444	485	-0.798056	4.80016e-06
16F182	XUTs	196	194	51	36	-1.91381	6.47222e-11
16F183	XUTs	133	142	61	58	-0.943033	0.00485479
16F184	XUTs	10	11	3	2	-1.82254	NA
16F19	XUTs	9	8	5	8	-0.0893415	NA
16F193	XUTs	0	0	0	1	1.83736	NA
16F197	XUTs	46	42	14	8	-1.75749	0.00698304
16F206	XUTs	0	0	0	0	NA	NA
16F208	XUTs	12	10	13	9	0.248947	0.865161
16F213	XUTs	81	60	62	49	-0.0872771	0.898149
16F224	XUTs	3	5	3	2	-0.434947	NA
16F226	XUTs	165	207	163	156	0.0458105	0.922359
16F227	XUTs	37	23	18	17	-0.508406	0.551494
16F229	XUTs	42	27	42	28	0.268709	0.722821
16F233	XUTs	74	70	35	34	-0.794034	0.0992974
16F236	XUTs	50	43	20	16	-1.11199	0.0691217
16F238	XUTs	343	327	180	192	-0.57248	0.0176072
16F24	XUTs	4	1	0	0	-3.4888	NA
16F243	XUTs	188	204	147	105	-0.388382	0.202369
16F247	XUTs	437	456	299	285	-0.343986	0.119878
16F27	XUTs	199	182	75	47	-1.39833	1.04785e-06
16F272	XUTs	6	3	5	3	0.0739113	NA
16F274	XUTs	0	1	0	1	0.352612	NA
16F28	XUTs	63	57	87	74	0.68545	0.092529
16F280	XUTs	118	130	70	60	-0.672123	0.0619618
16F292	XUTs	15	16	12	9	-0.309529	0.807653
16F30	XUTs	164	155	126	111	-0.165576	0.665982
16F31	XUTs	110	113	81	77	-0.230082	0.605722
16F310	XUTs	21	20	13	9	-0.649215	0.520398
16F311	XUTs	7	7	1	1	-2.54482	NA
16F324	XUTs	97	98	104	80	0.17035	0.709647
16F332	XUTs	4	6	0	2	-1.98066	NA
16F334	XUTs	5	5	2	1	-1.50089	NA
16F339	XUTs	1	2	5	0	0.861989	NA
16F348	XUTs	11	17	9	3	-1.01088	NA
16F35	XUTs	197	214	257	229	0.505744	0.0367546
16F353	XUTs	252	244	231	170	-0.0552242	0.882466
16F356	XUTs	7	4	9	3	0.335256	NA
16F36	XUTs	1	1	0	0	-2.17624	NA
16F363	XUTs	2	1	0	0	-2.75605	NA
16F376	XUTs	122	134	102	79	-0.246197	0.542562
16F377	XUTs	53	41	59	40	0.322603	0.592038
16F383	XUTs	56	46	40	51	0.123507	0.870054
16F384	XUTs	1	1	2	0	0.142199	NA
16F47	XUTs	172	193	111	126	-0.343932	0.333818
16F65	XUTs	77	102	28	39	-1.13238	0.013688
16F73	XUTs	0	0	0	0	NA	NA
16F81	XUTs	2	4	3	3	0.266086	NA
16F86	XUTs	0	0	0	0	NA	NA
16F88	XUTs	157	167	175	116	0.0891231	0.829237
16F95	XUTs	24	24	23	11	-0.270055	0.794085
16F98	XUTs	22	20	9	11	-0.790876	0.427809
16R132	XUTs	0	0	0	0	NA	NA
16R143	XUTs	129	120	167	102	0.350873	0.321506
16R144	XUTs	1	4	0	1	-2.01603	NA
16R15	XUTs	24	22	18	19	-0.0403642	0.972209
16R165	XUTs	28	31	24	12	-0.482878	0.574962
16R166	XUTs	29	36	12	25	-0.50168	0.568049
16R174	XUTs	56	49	25	25	-0.801023	0.170484
16R179	XUTs	3	1	2	1	-0.178149	NA
16R18	XUTs	2	2	1	0	-1.76848	NA
16R184	XUTs	138	138	105	86	-0.273096	0.469746
16R190	XUTs	33	32	22	14	-0.608297	0.43497
16R192	XUTs	57	57	52	25	-0.339158	0.590598
16R201	XUTs	15	9	11	2	-0.693682	NA
16R204	XUTs	47	51	40	24	-0.375248	0.567261
16R21	XUTs	0	0	0	0	NA	NA
16R218	XUTs	2	3	2	3	0.291786	NA
16R225	XUTs	46	35	33	38	0.0913401	0.918789
16R235	XUTs	12	22	16	10	-0.149046	0.916197
16R239	XUTs	30	41	23	22	-0.393098	0.621713
16R25	XUTs	23	13	8	10	-0.715159	0.523634
16R262	XUTs	4	7	4	1	-0.937297	NA
16R270	XUTs	57	48	34	44	-0.141021	0.853355
16R274	XUTs	20	21	24	25	0.530439	0.522752
16R276	XUTs	0	0	0	1	1.83736	NA
16R278	XUTs	12	11	15	12	0.488498	0.680652
16R283	XUTs	40	54	48	23	-0.181061	0.815579
16R288	XUTs	344	337	273	240	-0.145404	0.59724
16R29	XUTs	9	5	2	1	-1.98009	NA
16R295	XUTs	28	23	33	29	0.545662	0.449451
16R299	XUTs	17	6	17	9	0.413456	0.753053
16R30	XUTs	8	9	5	6	-0.349512	NA
16R307	XUTs	13	11	15	6	0.0253786	0.986726
16R310	XUTs	317	262	242	160	-0.2808	0.311925
16R314	XUTs	56	45	43	39	-0.0349536	0.966519
16R343	XUTs	55	57	33	33	-0.493954	0.40007
16R346	XUTs	98	100	56	37	-0.844343	0.0348446
16R348	XUTs	345	381	362	272	0.0563106	0.857185
16R349	XUTs	6	3	4	0	-1.00902	NA
16R351	XUTs	38	43	21	18	-0.795308	0.240175
16R354	XUTs	36	39	27	14	-0.638885	0.382006
16R359	XUTs	4	2	6	3	0.816218	NA
16R363	XUTs	10	15	6	5	-0.928862	NA
16R364	XUTs	44	42	37	23	-0.277135	0.703624
16R366	XUTs	116	76	37	37	-1.10366	0.0103969
16R375	XUTs	163	160	127	97	-0.27416	0.431719
16R376	XUTs	24	22	22	12	-0.200964	0.855164
16R399	XUTs	17	26	15	12	-0.417757	0.690671
16R402	XUTs	1	4	2	2	-0.0598995	NA
16R404	XUTs	21	28	17	9	-0.681961	0.459911
16R410	XUTs	49	52	33	33	-0.34465	0.596384
16R419	XUTs	148	149	130	95	-0.149578	0.708502
16R422	XUTs	92	95	76	72	-0.0704872	0.906094
16R425	XUTs	0	0	0	0	NA	NA
16R54	XUTs	59	50	43	39	-0.145423	0.837279
16R59	XUTs	7	2	6	4	0.404127	NA
16R6	XUTs	15	24	10	8	-0.862403	0.411045
16R66	XUTs	0	3	4	0	0.493775	NA
16R67	XUTs	7	4	1	1	-2.19176	NA
16R69	XUTs	64	62	57	47	-0.0182121	0.978692
16R8	XUTs	88	66	68	59	-0.014431	0.98233
16R82	XUTs	42	39	29	22	-0.41351	0.560881
16R9	XUTs	61	56	124	76	1.01282	0.00508417
16R94	XUTs	30	24	10	8	-1.32731	0.118294
16R98	XUTs	1	3	1	0	-1.7761	NA
1F1	XUTs	7	3	3	2	-0.747806	NA
1F11	XUTs	21	10	20	13	0.338257	0.768065
1F12	XUTs	40	41	25	19	-0.627038	0.3609
1F14	XUTs	82	117	73	50	-0.44954	0.324381
1F15	XUTs	131	98	46	31	-1.3228	0.000473758
1F23	XUTs	118	85	97	60	-0.128037	0.80972
1F25	XUTs	80	60	30	28	-1.00474	0.0416851
1F3	XUTs	0	0	0	0	NA	NA
1F32	XUTs	219	178	146	88	-0.522055	0.0862519
1F4	XUTs	106	90	76	54	-0.341736	0.443516
1F60	XUTs	68	97	54	51	-0.387717	0.445153
1F72	XUTs	64	68	39	34	-0.593754	0.255428
1F75	XUTs	70	62	49	49	-0.158679	0.799838
1F89	XUTs	51	51	68	47	0.420479	0.42334
1F90	XUTs	399	301	194	146	-0.78691	0.000473758
1F93	XUTs	23	19	14	13	-0.371244	0.723655
1R101	XUTs	0	0	0	0	NA	NA
1R103	XUTs	21	16	4	0	-3.00481	NA
1R107	XUTs	3	1	5	2	1.02679	NA
1R108	XUTs	74	79	17	20	-1.7754	0.000221934
1R16	XUTs	45	36	26	18	-0.63046	0.362609
1R18	XUTs	226	224	271	205	0.334126	0.188894
1R2	XUTs	0	0	1	1	2.71626	NA
1R20	XUTs	1	3	0	0	-3.18397	NA
1R35	XUTs	26	27	17	13	-0.567398	0.517172
1R39	XUTs	2	2	0	1	-1.68085	NA
1R40	XUTs	17	25	8	10	-0.945375	0.350312
1R5	XUTs	5	2	3	3	0.0529058	NA
1R55	XUTs	7	2	8	3	0.507394	NA
1R79	XUTs	7	9	2	3	-1.39527	NA
1R80	XUTs	6	0	2	2	-0.300608	NA
1R83	XUTs	13	15	12	4	-0.596785	0.650166
1R85	XUTs	4	5	8	3	0.500329	NA
1R87	XUTs	15	19	9	11	-0.486884	0.678697
1R90	XUTs	12	10	5	1	-1.66771	NA
1R91	XUTs	22	39	7	8	-1.75596	0.0362643
1R99	XUTs	3	2	0	0	-3.49508	NA
2F101	XUTs	24	23	19	14	-0.258176	0.801893
2F106	XUTs	82	83	36	23	-1.23867	0.00485479
2F116	XUTs	210	178	257	180	0.420425	0.108497
2F118	XUTs	70	69	27	10	-1.68684	0.00114988
2F123	XUTs	0	0	0	0	NA	NA
2F125	XUTs	51	36	47	34	0.149503	0.845055
2F127	XUTs	15	19	18	14	0.165929	0.895623
2F132	XUTs	76	78	59	28	-0.597201	0.234767
2F134	XUTs	100	76	68	55	-0.257806	0.607794
2F136	XUTs	84	95	72	57	-0.217497	0.663505
2F141	XUTs	36	44	37	33	0.0693662	0.938144
2F143	XUTs	8	16	12	10	0.129332	0.936101
2F145	XUTs	139	123	96	66	-0.445167	0.228075
2F146	XUTs	279	269	205	153	-0.361682	0.156972
2F149	XUTs	97	93	68	56	-0.357163	0.424012
2F150	XUTs	139	145	65	46	-1.10579	0.00065508
2F154	XUTs	347	267	316	256	0.157514	0.584148
2F158	XUTs	82	78	56	27	-0.718224	0.132598
2F161	XUTs	304	283	467	360	0.74931	2.48872e-05
2F166	XUTs	128	86	63	48	-0.690588	0.0929269
2F169	XUTs	0	0	0	0	NA	NA
2F170	XUTs	0	0	0	0	NA	NA
2F177	XUTs	350	296	234	179	-0.390365	0.102238
2F190	XUTs	361	353	381	355	0.312023	0.159678
2F197	XUTs	165	170	133	133	-0.0615296	0.895356
2F2	XUTs	13	14	8	4	-0.937456	NA
2F206	XUTs	36	35	38	31	0.216776	0.776032
2F221	XUTs	40	28	37	29	0.21455	0.787925
2F225	XUTs	18	49	12	12	-1.21928	0.145899
2F240	XUTs	4	2	4	3	0.478999	NA
2F242	XUTs	668	576	576	476	0.0186862	0.94914
2F252	XUTs	0	0	3	1	3.63991	NA
2F258	XUTs	3	0	1	2	0.325658	NA
2F270	XUTs	7	13	5	2	-1.29413	NA
2F274	XUTs	9	3	3	1	-1.35986	NA
2F282	XUTs	159	157	111	79	-0.484238	0.136494
2F291	XUTs	0	0	0	0	NA	NA
2F313	XUTs	20	13	7	5	-1.20579	0.295989
2F319	XUTs	3	2	3	1	-0.109243	NA
2F32	XUTs	13	7	13	7	0.236433	NA
2F340	XUTs	194	181	158	132	-0.110926	0.766741
2F43	XUTs	35	29	28	15	-0.338755	0.692116
2F50	XUTs	106	84	84	54	-0.21649	0.662167
2F78	XUTs	27	27	20	21	-0.124625	0.907761
2F87	XUTs	73	72	38	21	-1.05979	0.0270793
2F89	XUTs	6	6	4	1	-1.05733	NA
2F91	XUTs	40	41	17	13	-1.1792	0.0746127
2F93	XUTs	16	9	16	6	0.0320568	0.983613
2R103	XUTs	11	10	1	3	-2.08932	NA
2R109	XUTs	54	42	44	40	0.0735526	0.927282
2R11	XUTs	14	8	8	8	-0.186228	NA
2R114	XUTs	54	67	52	40	-0.142547	0.830734
2R121	XUTs	8	8	4	4	-0.731966	NA
2R127	XUTs	48	70	26	23	-1.00888	0.0681278
2R136	XUTs	22	34	19	19	-0.292525	0.754011
2R142	XUTs	0	0	0	0	NA	NA
2R154	XUTs	22	16	23	24	0.582451	0.491797
2R166	XUTs	0	1	2	1	1.80484	NA
2R170	XUTs	36	22	30	31	0.349151	0.661097
2R172	XUTs	42	44	11	7	-2.00977	0.00281045
2R178	XUTs	124	92	95	70	-0.135045	0.787242
2R183	XUTs	6	6	5	11	0.734927	NA
2R200	XUTs	6	3	1	7	0.199405	NA
2R226	XUTs	70	84	40	21	-1.10281	0.0195888
2R246	XUTs	5	2	0	2	-1.44194	NA
2R256	XUTs	537	605	308	255	-0.762278	1.59954e-05
2R264	XUTs	16	7	2	4	-1.63665	NA
2R267	XUTs	14	10	8	6	-0.522549	NA
2R271	XUTs	3	1	0	0	-3.16847	NA
2R272	XUTs	4	4	1	2	-1.11615	NA
2R288	XUTs	21	23	12	1	-1.5801	0.139703
2R296	XUTs	0	0	0	0	NA	NA
2R299	XUTs	18	11	14	13	0.165771	0.905514
2R307	XUTs	46	45	21	11	-1.27162	0.0427203
2R31	XUTs	41	28	25	12	-0.667839	0.393265
2R314	XUTs	2	2	3	0	-0.269065	NA
2R318	XUTs	36	38	37	14	-0.323468	0.696049
2R334	XUTs	92	75	57	47	-0.423599	0.376267
2R342	XUTs	248	272	261	194	0.0585644	0.869925
2R343	XUTs	72	94	82	59	0.0126857	0.983754
2R344	XUTs	22	31	13	22	-0.299499	0.766435
2R349	XUTs	13	7	13	10	0.459494	0.728379
2R39	XUTs	3	6	2	2	-0.906876	NA
2R43	XUTs	19	16	12	8	-0.559751	0.623473
2R48	XUTs	303	314	187	150	-0.616042	0.0060151
2R56	XUTs	11	11	8	6	-0.399273	NA
2R58	XUTs	1	0	0	0	-1.1707	NA
2R61	XUTs	2	3	0	0	-3.50126	NA
2R63	XUTs	117	109	59	56	-0.70804	0.0615714
2R65	XUTs	205	229	299	190	0.412165	0.110223
2R67	XUTs	2	1	1	1	-0.312001	NA
2R74	XUTs	3	3	3	4	0.510545	NA
2R82	XUTs	20	16	18	16	0.181976	0.879484
2R85	XUTs	263	225	283	263	0.430808	0.0740977
2R86	XUTs	1	1	0	1	-0.660848	NA
2R91	XUTs	7	4	6	4	0.111633	NA
2R93	XUTs	54	54	29	23	-0.798607	0.15861
3F108	XUTs	77	72	57	39	-0.386316	0.446168
3F11	XUTs	19	18	15	9	-0.383718	0.733208
3F111	XUTs	5	5	2	1	-1.50089	NA
3F12	XUTs	74	62	63	42	-0.126459	0.844436
3F130	XUTs	1	0	0	0	-1.1707	NA
3F132	XUTs	21	25	10	10	-0.935055	0.321949
3F31	XUTs	13	15	10	6	-0.567447	0.65795
3F33	XUTs	16	22	12	5	-0.938845	0.383116
3F39	XUTs	0	1	1	2	1.89632	NA
3F45	XUTs	5	2	4	2	0.0125726	NA
3F5	XUTs	3	3	2	1	-0.767108	NA
3F51	XUTs	41	27	23	15	-0.591691	0.446553
3F58	XUTs	122	156	171	105	0.226813	0.558763
3F6	XUTs	1	1	2	3	1.6201	NA
3F61	XUTs	25	23	22	20	0.0721932	0.948686
3F65	XUTs	31	44	42	35	0.295046	0.675454
3F70	XUTs	3	3	4	3	0.475048	NA
3F71	XUTs	136	175	179	111	0.136953	0.738774
3F74	XUTs	30	34	55	37	0.768322	0.174458
3F78	XUTs	93	102	60	53	-0.52557	0.215874
3F82	XUTs	3	1	2	0	-0.836764	NA
3F84	XUTs	0	1	0	1	0.352612	NA
3F92	XUTs	8	3	1	3	-1.13576	NA
3F94	XUTs	11	13	11	5	-0.360492	NA
3F99	XUTs	112	118	53	34	-1.15799	0.00157524
3R100	XUTs	51	48	45	46	0.150878	0.828802
3R106	XUTs	114	138	66	50	-0.867329	0.01458
3R119	XUTs	31	40	34	37	0.274762	0.711114
3R124	XUTs	1	0	2	2	2.27569	NA
3R130	XUTs	6	3	0	1	-2.8677	NA
3R136	XUTs	46	49	20	12	-1.32777	0.0291494
3R144	XUTs	19	18	21	12	0.0719104	0.954725
3R147	XUTs	3	0	1	0	-1.34383	NA
3R18	XUTs	8	5	6	2	-0.485787	NA
3R28	XUTs	0	1	0	1	0.352612	NA
3R41	XUTs	12	15	6	7	-0.779698	NA
3R44	XUTs	170	157	97	98	-0.47425	0.154952
3R46	XUTs	107	111	64	58	-0.574029	0.144283
3R54	XUTs	22	25	10	9	-1.04544	0.258664
3R67	XUTs	55	72	87	63	0.48865	0.28671
3R8	XUTs	9	13	1	4	-1.82394	NA
3R90	XUTs	2	0	0	2	0.410926	NA
4F115	XUTs	184	167	124	67	-0.644161	0.0427203
4F117	XUTs	2	5	2	6	0.521828	NA
4F127	XUTs	89	69	107	82	0.513999	0.193786
4F132	XUTs	0	0	1	0	1.65689	NA
4F137	XUTs	30	34	30	26	0.0680063	0.945298
4F14	XUTs	16	19	12	6	-0.728657	0.512437
4F142	XUTs	8	16	15	10	0.299954	0.825184
4F148	XUTs	10	10	9	3	-0.525386	NA
4F160	XUTs	78	94	58	43	-0.517286	0.263497
4F161	XUTs	38	38	13	11	-1.40431	0.0421849
4F162	XUTs	32	42	53	32	0.437006	0.492353
4F175	XUTs	282	251	122	87	-1.09977	3.71084e-06
4F180	XUTs	4	5	13	9	1.5356	NA
4F181	XUTs	3	13	7	6	-0.0469968	NA
4F19	XUTs	3	0	0	0	-2.74514	NA
4F193	XUTs	81	74	21	19	-1.69213	0.000290045
4F194	XUTs	1	3	1	3	0.325081	NA
4F204	XUTs	17	17	10	8	-0.661223	0.557956
4F206	XUTs	2	1	0	0	-2.75605	NA
4F207	XUTs	1	0	1	0	0.224894	NA
4F231	XUTs	3	6	7	2	0.195475	NA
4F238	XUTs	11	7	3	3	-1.31528	NA
4F240	XUTs	10	6	19	9	1.03334	0.372208
4F241	XUTs	5	1	1	0	-2.34042	NA
4F242	XUTs	83	85	108	84	0.447396	0.253074
4F248	XUTs	104	94	72	46	-0.502509	0.23879
4F253	XUTs	1113	995	406	339	-1.24011	1.00013e-18
4F255	XUTs	308	361	295	222	-0.120361	0.682789
4F267	XUTs	344	364	221	152	-0.677767	0.00140111
4F272	XUTs	63	74	95	47	0.276318	0.608616
4F273	XUTs	18	18	9	10	-0.64781	0.555844
4F278	XUTs	16	23	14	16	-0.102851	0.938144
4F28	XUTs	2	3	0	3	-0.356273	NA
4F285	XUTs	18	11	10	3	-0.944782	NA
4F288	XUTs	6	8	9	7	0.445819	NA
4F293	XUTs	36	18	23	10	-0.484095	0.616908
4F297	XUTs	0	0	0	0	NA	NA
4F30	XUTs	68	76	81	59	0.209395	0.689301
4F300	XUTs	60	53	10	9	-2.31143	0.0001102
4F303	XUTs	56	57	45	38	-0.18552	0.776814
4F306	XUTs	64	60	33	21	-0.954441	0.066526
4F309	XUTs	7	6	1	7	-0.341313	NA
4F316	XUTs	13	12	27	10	0.775126	0.443516
4F32	XUTs	5	5	4	3	-0.261784	NA
4F321	XUTs	0	0	0	0	NA	NA
4F328	XUTs	35	22	13	8	-1.19407	0.155397
4F331	XUTs	1	0	1	0	0.224894	NA
4F339	XUTs	29	36	20	8	-0.994908	0.208031
4F34	XUTs	3	1	1	3	0.337424	NA
4F340	XUTs	6	15	14	8	0.29726	0.844773
4F341	XUTs	45	55	23	23	-0.853306	0.155647
4F342	XUTs	9	12	15	4	0.049906	NA
4F348	XUTs	34	31	21	15	-0.601646	0.439219
4F350	XUTs	6	14	1	2	-2.45653	NA
4F352	XUTs	4	3	2	0	-1.63135	NA
4F354	XUTs	17	12	10	12	-0.115687	0.939413
4F361	XUTs	4	5	8	5	0.770404	NA
4F376	XUTs	78	71	72	52	-0.0140107	0.982553
4F377	XUTs	9	5	5	4	-0.37723	NA
4F381	XUTs	0	0	1	1	2.71626	NA
4F384	XUTs	13	17	15	15	0.26881	0.822843
4F395	XUTs	60	39	40	17	-0.573032	0.394004
4F416	XUTs	3	1	0	1	-1.67214	NA
4F426	XUTs	8	7	10	10	0.686743	NA
4F43	XUTs	224	192	212	146	0.0313349	0.941598
4F435	XUTs	16	10	18	10	0.344043	0.782541
4F441	XUTs	6	9	9	12	0.772901	NA
4F446	XUTs	47	47	14	8	-1.85297	0.00331304
4F447	XUTs	128	144	91	75	-0.454941	0.207867
4F448	XUTs	7	4	3	5	-0.157248	NA
4F449	XUTs	55	52	31	16	-0.95276	0.0977606
4F467	XUTs	106	86	42	30	-1.16311	0.00421416
4F473	XUTs	11	5	6	2	-0.781801	NA
4F478	XUTs	170	163	125	97	-0.329956	0.327031
4F491	XUTs	25	26	14	15	-0.542033	0.551494
4F497	XUTs	43	24	33	28	0.128824	0.89193
4F50	XUTs	136	109	79	68	-0.474499	0.217508
4F500	XUTs	99	99	105	83	0.181143	0.688845
4F505	XUTs	31	35	50	35	0.612422	0.311866
4F521	XUTs	0	0	0	0	NA	NA
4F522	XUTs	0	1	0	0	-1.18958	NA
4F523	XUTs	0	0	0	0	NA	NA
4F524	XUTs	61	57	68	61	0.393072	0.427251
4F526	XUTs	267	269	124	106	-0.960443	4.37773e-05
4F529	XUTs	64	53	90	41	0.384506	0.478742
4F531	XUTs	18	21	6	2	-2.0618	0.060637
4F532	XUTs	201	184	114	112	-0.498546	0.0988325
4F544	XUTs	16	9	21	28	1.26597	0.122356
4F546	XUTs	8	12	3	5	-1.0319	NA
4F562	XUTs	49	34	21	11	-1.13739	0.0920237
4F582	XUTs	6	2	4	1	-0.472274	NA
4F592	XUTs	61	50	48	30	-0.265649	0.678423
4F597	XUTs	22	15	21	19	0.379242	0.699803
4F605	XUTs	107	119	98	64	-0.23683	0.592038
4F609	XUTs	6	3	1	3	-0.845464	NA
4F617	XUTs	14	18	12	16	0.0936257	0.946642
4F622	XUTs	53	63	38	23	-0.687396	0.221036
4F626	XUTs	4	2	2	1	-0.7628	NA
4F63	XUTs	1	0	0	0	-1.1707	NA
4F639	XUTs	29	26	25	18	-0.104069	0.922865
4F642	XUTs	88	99	90	87	0.188972	0.691229
4F643	XUTs	22	16	4	1	-2.69941	NA
4F645	XUTs	91	65	67	48	-0.187813	0.739462
4F652	XUTs	5	3	3	1	-0.782164	NA
4F655	XUTs	18	12	16	9	-0.0246118	0.985406
4F66	XUTs	3	5	3	1	-0.788963	NA
4F661	XUTs	17	20	12	9	-0.5654	0.604712
4F669	XUTs	80	72	54	43	-0.391096	0.434111
4F675	XUTs	172	144	200	121	0.261864	0.445153
4F685	XUTs	85	114	107	56	-0.0606803	0.923031
4F689	XUTs	14	12	28	19	1.10097	0.180175
4F692	XUTs	2	1	2	2	0.689466	NA
4F697	XUTs	144	161	94	67	-0.672754	0.037048
4F700	XUTs	97	121	101	86	0.0379356	0.947095
4F703	XUTs	0	0	1	0	1.65689	NA
4F705	XUTs	38	34	14	10	-1.33342	0.0615552
4F707	XUTs	17	15	23	20	0.689058	0.431388
4F709	XUTs	3	4	2	4	0.0851304	NA
4F711	XUTs	38	35	6	4	-2.61747	0.00106028
4F87	XUTs	15	11	4	2	-1.87574	NA
4F90	XUTs	1	2	1	1	-0.320563	NA
4F92	XUTs	1	1	1	0	-0.774431	NA
4R1	XUTs	12	3	3	2	-1.32898	NA
4R100	XUTs	88	87	61	54	-0.34314	0.465077
4R104	XUTs	0	0	1	0	1.65689	NA
4R120	XUTs	12	11	12	8	0.0446865	0.977695
4R125	XUTs	60	54	50	51	0.0979242	0.89193
4R15	XUTs	17	11	4	0	-2.61122	NA
4R155	XUTs	63	71	53	48	-0.144569	0.816718
4R167	XUTs	30	10	24	11	0.0358835	0.978692
4R172	XUTs	5	11	5	8	-0.00615759	NA
4R177	XUTs	58	64	89	76	0.696095	0.083834
4R182	XUTs	10	18	8	8	-0.542266	0.680608
4R190	XUTs	539	565	487	345	-0.160089	0.466899
4R195	XUTs	0	2	1	0	-0.790529	NA
4R200	XUTs	1	3	1	0	-1.7761	NA
4R203	XUTs	67	37	73	62	0.641125	0.197288
4R212	XUTs	377	386	402	268	0.0564834	0.855164
4R218	XUTs	144	138	133	99	-0.0291634	0.953015
4R231	XUTs	12	8	15	11	0.63204	0.597852
4R234	XUTs	27	7	5	6	-1.34159	0.282816
4R237	XUTs	32	27	17	11	-0.828909	0.311291
4R246	XUTs	2	4	0	1	-2.28194	NA
4R252	XUTs	151	125	96	64	-0.539512	0.126838
4R253	XUTs	0	2	4	0	1.11202	NA
4R255	XUTs	55	38	84	69	0.97905	0.0198299
4R263	XUTs	304	321	348	281	0.266351	0.257982
4R265	XUTs	288	265	214	149	-0.358847	0.165602
4R27	XUTs	67	45	16	11	-1.80021	0.00196051
4R274	XUTs	167	171	109	97	-0.451535	0.158944
4R283	XUTs	4	7	8	6	0.597315	NA
4R298	XUTs	44	36	35	28	-0.0867966	0.922865
4R303	XUTs	1017	1042	1329	1030	0.450729	0.00059175
4R309	XUTs	0	1	0	0	-1.18958	NA
4R313	XUTs	10	7	4	0	-1.90835	NA
4R327	XUTs	4	4	2	0	-1.82163	NA
4R329	XUTs	50	51	68	34	0.241337	0.705516
4R333	XUTs	4	4	0	0	-4.17625	NA
4R336	XUTs	23	37	36	27	0.319975	0.68833
4R342	XUTs	34	19	19	15	-0.380873	0.690852
4R346	XUTs	28	26	34	20	0.238323	0.786926
4R364	XUTs	921	874	758	553	-0.202671	0.249588
4R365	XUTs	17	14	13	5	-0.564918	0.649042
4R370	XUTs	86	59	81	44	0.0204875	0.976938
4R372	XUTs	139	126	124	122	0.163812	0.690852
4R374	XUTs	2	12	1	1	-2.55466	NA
4R393	XUTs	89	96	116	87	0.386013	0.323351
4R40	XUTs	2	2	1	1	-0.732328	NA
4R411	XUTs	29	23	5	10	-1.49368	0.0988325
4R418	XUTs	1	2	1	0	-1.36096	NA
4R423	XUTs	72	82	47	30	-0.75691	0.106158
4R446	XUTs	47	45	52	44	0.321864	0.592038
4R45	XUTs	68	55	43	29	-0.524376	0.346005
4R456	XUTs	87	85	83	52	-0.107559	0.852868
4R458	XUTs	2	0	2	3	1.63138	NA
4R461	XUTs	51	35	14	15	-1.2949	0.0492706
4R468	XUTs	1	2	1	0	-1.36096	NA
4R483	XUTs	65	76	49	47	-0.288186	0.604712
4R486	XUTs	62	56	67	50	0.240666	0.667464
4R488	XUTs	2	3	2	3	0.291786	NA
4R491	XUTs	114	122	48	46	-1.06261	0.003343
4R506	XUTs	84	93	52	47	-0.575497	0.196867
4R514	XUTs	23	20	25	21	0.357835	0.692217
4R515	XUTs	66	62	56	47	-0.0536055	0.94067
4R521	XUTs	2	1	0	0	-2.75605	NA
4R527	XUTs	147	136	95	77	-0.46057	0.18707
4R529	XUTs	35	28	17	17	-0.619556	0.438018
4R535	XUTs	17	12	3	5	-1.56709	NA
4R546	XUTs	12	6	6	7	-0.18635	NA
4R548	XUTs	14	12	11	10	-0.043057	0.977695
4R549	XUTs	21	19	11	11	-0.593225	0.56877
4R55	XUTs	856	845	897	782	0.245158	0.145025
4R552	XUTs	20	18	11	6	-0.922739	0.381834
4R56	XUTs	109	57	55	18	-0.990067	0.356433
4R57	XUTs	307	381	229	234	-0.298604	0.288281
4R570	XUTs	2	5	4	2	0.00164596	NA
4R585	XUTs	19	13	8	2	-1.46705	NA
4R592	XUTs	12	12	6	9	-0.386222	NA
4R597	XUTs	1	0	0	0	-1.1707	NA
4R599	XUTs	11	6	4	8	-0.189295	NA
4R608	XUTs	14	12	9	9	-0.260217	0.859642
4R617	XUTs	39	36	24	20	-0.510171	0.479992
4R618	XUTs	1	0	0	0	-1.1707	NA
4R619	XUTs	26	25	36	38	0.812347	0.202432
4R68	XUTs	1	1	0	0	-2.17624	NA
4R71	XUTs	18	17	8	14	-0.368204	0.760355
4R81	XUTs	750	785	880	607	0.199609	0.281094
4R9	XUTs	229	200	159	96	-0.510277	0.0774934
4R92	XUTs	53	39	20	15	-1.13917	0.0679194
4R94	XUTs	108	79	65	48	-0.472773	0.297056
5F101	XUTs	57	37	18	18	-1.11366	0.0768879
5F112	XUTs	28	21	12	7	-1.12404	0.215358
5F115	XUTs	1	0	2	5	3.14334	NA
5F117	XUTs	1	2	1	0	-1.36096	NA
5F12	XUTs	79	90	25	21	-1.62004	0.00026249
5F122	XUTs	79	61	174	133	1.38798	1.45568e-06
5F125	XUTs	28	24	20	21	-0.0690147	0.950496
5F126	XUTs	24	18	12	18	-0.189478	0.875756
5F128	XUTs	1186	1145	586	523	-0.806553	5.61262e-09
5F129	XUTs	189	168	196	164	0.27266	0.371702
5F136	XUTs	21	16	30	17	0.581742	0.499077
5F139	XUTs	381	349	233	175	-0.586009	0.00496008
5F140	XUTs	0	0	0	0	NA	NA
5F151	XUTs	17	13	5	10	-0.692626	0.584461
5F166	XUTs	62	51	28	39	-0.4628	0.454207
5F171	XUTs	62	58	16	19	-1.5025	0.00539513
5F174	XUTs	7	13	13	10	0.452162	0.734092
5F180	XUTs	43	60	44	20	-0.46511	0.47849
5F185	XUTs	1	0	0	0	-1.1707	NA
5F191	XUTs	115	118	42	51	-1.04566	0.00585474
5F195	XUTs	100	94	55	52	-0.591957	0.158956
5F207	XUTs	51	43	42	43	0.128037	0.864992
5F21	XUTs	25	12	25	10	0.139051	0.917593
5F213	XUTs	207	169	116	108	-0.479674	0.122356
5F217	XUTs	108	102	81	64	-0.278157	0.523762
5F218	XUTs	6	12	6	2	-0.96028	NA
5F222	XUTs	24	12	5	1	-2.36671	NA
5F223	XUTs	5	13	2	2	-1.91133	NA
5F233	XUTs	5	3	1	2	-1.11238	NA
5F238	XUTs	36	27	19	17	-0.542729	0.499693
5F239	XUTs	299	233	117	100	-1.03148	3.18183e-05
5F24	XUTs	43	29	23	16	-0.633205	0.398678
5F248	XUTs	11	9	13	8	0.312303	0.830403
5F255	XUTs	231	255	227	168	-0.0481797	0.903586
5F256	XUTs	0	0	1	0	1.65689	NA
5F33	XUTs	0	0	0	0	NA	NA
5F52	XUTs	18	17	11	5	-0.900762	0.417631
5F55	XUTs	3	5	1	3	-0.682004	NA
5F62	XUTs	16	12	23	20	0.882741	0.311925
5F67	XUTs	52	51	43	28	-0.292056	0.653529
5F68	XUTs	16	6	5	0	-1.95799	NA
5F7	XUTs	75	58	42	46	-0.318375	0.584461
5F75	XUTs	46	53	33	15	-0.81905	0.188937
5F90	XUTs	0	0	1	0	1.65689	NA
5F98	XUTs	61	47	32	25	-0.665139	0.2563
5R11	XUTs	106	135	69	48	-0.7958	0.0322216
5R111	XUTs	20	24	11	8	-0.961395	0.319436
5R115	XUTs	35	33	39	27	0.205052	0.796519
5R12	XUTs	14	21	7	4	-1.43195	0.202537
5R126	XUTs	77	76	46	30	-0.764096	0.100306
5R129	XUTs	139	116	139	146	0.437561	0.198586
5R135	XUTs	0	1	3	0	1.70084	NA
5R139	XUTs	3	0	2	0	-0.428172	NA
5R142	XUTs	7	1	1	0	-2.75151	NA
5R144	XUTs	287	238	297	193	0.144293	0.643013
5R148	XUTs	19	21	10	7	-0.985672	0.333944
5R151	XUTs	234	242	123	82	-0.96944	0.000114246
5R165	XUTs	2	4	4	6	1.03084	NA
5R166	XUTs	38	31	43	35	0.435907	0.500879
5R168	XUTs	33	51	21	21	-0.734	0.289722
5R182	XUTs	13	16	11	8	-0.360369	0.783937
5R192	XUTs	14	11	9	8	-0.292354	0.844251
5R194	XUTs	148	187	174	158	0.251037	0.458518
5R205	XUTs	1	2	0	0	-2.76634	NA
5R207	XUTs	0	0	0	0	NA	NA
5R211	XUTs	5	2	3	1	-0.588917	NA
5R216	XUTs	9	8	5	2	-1.05551	NA
5R225	XUTs	34	29	39	31	0.409239	0.557322
5R227	XUTs	8	6	1	2	-1.92956	NA
5R230	XUTs	9	12	0	2	-3.07975	NA
5R232	XUTs	39	33	12	4	-1.94608	0.010767
5R239	XUTs	3	2	3	2	0.248146	NA
5R245	XUTs	0	0	0	0	NA	NA
5R247	XUTs	31	22	43	25	0.597907	0.397075
5R26	XUTs	24	21	12	8	-0.922057	0.333924
5R36	XUTs	31	33	9	8	-1.65247	0.0335319
5R40	XUTs	11	9	7	8	-0.136406	NA
5R48	XUTs	4	0	1	0	-1.75631	NA
5R72	XUTs	22	13	13	2	-1.03411	0.393817
5R74	XUTs	101	84	57	46	-0.586665	0.175365
5R75	XUTs	28	40	37	50	0.64581	0.308397
5R76	XUTs	225	279	215	171	-0.129981	0.700144
5R81	XUTs	24	29	18	13	-0.524281	0.556828
5R90m	XUTs	119	129	68	61	-0.680531	0.0592663
5R93	XUTs	187	162	140	90	-0.357458	0.285081
5R97	XUTs	59	49	21	8	-1.67145	0.0049493
6F104	XUTs	15	13	10	10	-0.21509	0.882466
6F106	XUTs	11	21	8	6	-0.94415	0.425368
6F108	XUTs	4	6	2	1	-1.50381	NA
6F13	XUTs	0	0	0	0	NA	NA
6F15	XUTs	0	0	0	0	NA	NA
6F22	XUTs	201	216	273	264	0.635135	0.00609578
6F28	XUTs	0	0	0	0	NA	NA
6F34	XUTs	11	8	7	2	-0.868004	NA
6F39	XUTs	26	20	13	12	-0.613708	0.520398
6F46	XUTs	19	10	13	11	-0.00898756	0.995181
6F52	XUTs	11	9	3	3	-1.46954	NA
6F62	XUTs	26	31	20	24	-0.0934806	0.931526
6F83	XUTs	17	13	11	2	-1.01307	0.427778
6F87	XUTs	5	12	10	7	0.243122	NA
6F9	XUTs	0	0	0	0	NA	NA
6R1	XUTs	0	0	0	0	NA	NA
6R108	XUTs	8	3	2	1	-1.63176	NA
6R114	XUTs	1	0	0	0	-1.1707	NA
6R115	XUTs	380	423	280	226	-0.409727	0.0574045
6R13	XUTs	0	0	0	0	NA	NA
6R17	XUTs	0	0	0	0	NA	NA
6R28	XUTs	15	7	3	0	-2.67459	NA
6R35	XUTs	0	0	0	0	NA	NA
6R39	XUTs	74	64	38	29	-0.787647	0.109531
6R50	XUTs	117	88	53	35	-0.972075	0.0153606
6R53	XUTs	17	21	13	10	-0.471568	0.665466
6R65	XUTs	55	45	35	22	-0.566615	0.362371
6R66	XUTs	63	76	88	69	0.429922	0.337354
6R7	XUTs	0	3	0	0	-2.77709	NA
6R81	XUTs	185	134	111	95	-0.367634	0.311291
6R82	XUTs	32	25	3	1	-3.59241	0.00116429
6R86	XUTs	0	1	0	0	-1.18958	NA
6R94	XUTs	1	3	1	1	-0.738834	NA
7F110	XUTs	4	2	2	2	-0.311675	NA
7F114	XUTs	4	1	0	1	-1.99815	NA
7F126	XUTs	25	20	20	18	0.0211591	0.985032
7F130	XUTs	54	48	59	57	0.455259	0.383249
7F133	XUTs	330	320	556	417	0.834492	4.56091e-07
7F144	XUTs	9	4	2	2	-1.42866	NA
7F158	XUTs	146	108	71	52	-0.79263	0.0285694
7F16	XUTs	25	16	21	24	0.416722	0.650166
7F163	XUTs	10	5	0	3	-1.96828	NA
7F17	XUTs	5	12	2	3	-1.48657	NA
7F175	XUTs	5	12	5	3	-0.851933	NA
7F177	XUTs	2	2	0	0	-3.17624	NA
7F185	XUTs	14	5	1	2	-2.36814	NA
7F206	XUTs	22	25	37	45	1.08768	0.0696938
7F209	XUTs	8	5	4	0	-1.52952	NA
7F211	XUTs	341	382	231	174	-0.584099	0.00644476
7F213	XUTs	71	107	77	47	-0.284807	0.589307
7F236	XUTs	3	2	5	5	1.27359	NA
7F261	XUTs	366	335	302	221	-0.171118	0.508658
7F267	XUTs	99	106	45	40	-1.0087	0.00955541
7F271	XUTs	9	8	3	2	-1.51668	NA
7F276	XUTs	41	52	44	23	-0.243229	0.738774
7F281	XUTs	128	104	99	94	0.00366927	0.994588
7F283	XUTs	61	52	47	42	-0.0800959	0.916622
7F291	XUTs	12	4	4	1	-1.46285	NA
7F296	XUTs	11	11	14	5	-0.000263456	NA
7F31	XUTs	137	150	93	70	-0.563898	0.0947779
7F311	XUTs	47	50	26	22	-0.756031	0.213429
7F323	XUTs	65	59	57	57	0.150124	0.807354
7F324	XUTs	88	98	108	91	0.356891	0.371477
7F333	XUTs	18	13	9	5	-0.906807	0.444831
7F339	XUTs	0	0	0	0	NA	NA
7F347	XUTs	12	11	9	4	-0.596848	NA
7F353	XUTs	33	22	9	10	-1.25823	0.140611
7F358	XUTs	3	2	2	2	-0.0500154	NA
7F36	XUTs	107	102	293	266	1.68604	2.46108e-14
7F362	XUTs	1	0	0	0	-1.1707	NA
7F368	XUTs	11	13	13	7	-0.0305255	0.984453
7F375	XUTs	38	33	32	28	0.0200521	0.982523
7F380	XUTs	28	21	9	5	-1.56525	0.0872381
7F384	XUTs	91	98	25	15	-1.99663	4.48853e-06
7F391	XUTs	3	2	3	1	-0.109243	NA
7F393	XUTs	2	8	3	1	-1.11506	NA
7F400	XUTs	11	8	6	3	-0.843203	NA
7F402	XUTs	16	12	13	7	-0.249432	0.861718
7F406	XUTs	3	2	4	2	0.493887	NA
7F409	XUTs	3	6	2	2	-0.906876	NA
7F413	XUTs	0	0	0	0	NA	NA
7F414	XUTs	61	47	45	43	-0.0261134	0.973493
7F426	XUTs	18	22	19	10	-0.232637	0.844251
7F437	XUTs	169	146	111	74	-0.521098	0.113053
7F439	XUTs	279	293	305	244	0.197288	0.447771
7F44	XUTs	34	18	24	28	0.285409	0.752113
7F447	XUTs	141	139	125	107	-0.0102494	0.9829
7F455	XUTs	36	46	31	25	-0.294868	0.693356
7F460	XUTs	129	110	69	58	-0.651785	0.0772885
7F466	XUTs	1	0	0	0	-1.1707	NA
7F469	XUTs	148	142	97	79	-0.462623	0.178727
7F470	XUTs	43	32	22	20	-0.570898	0.434027
7F471	XUTs	19	32	31	20	0.239833	0.797984
7F475	XUTs	167	175	156	120	-0.0554732	0.902654
7F478	XUTs	8	4	1	2	-1.70149	NA
7F479	XUTs	4	0	4	1	0.523998	NA
7F48	XUTs	6	5	1	4	-0.805012	NA
7F480	XUTs	9	10	4	2	-1.42826	NA
7F59	XUTs	12	12	18	10	0.456657	0.701568
7F64	XUTs	2	4	5	8	1.41495	NA
7F65	XUTs	6	5	3	3	-0.604965	NA
7F7	XUTs	1	0	0	0	-1.1707	NA
7F71	XUTs	20	10	5	7	-1.03192	0.407967
7F76	XUTs	45	32	28	27	-0.215415	0.792029
7F91	XUTs	0	0	0	0	NA	NA
7F95	XUTs	12	12	8	12	0.0312	0.983874
7R104	XUTs	3	2	1	1	-1.05229	NA
7R105	XUTs	88	60	61	46	-0.212422	0.711826
7R114	XUTs	30	18	15	8	-0.822974	0.384862
7R116	XUTs	9	5	1	0	-3.55866	NA
7R12	XUTs	19	22	15	15	-0.182019	0.879552
7R123	XUTs	163	155	54	39	-1.52214	1.08567e-06
7R124	XUTs	9	11	14	16	0.863872	0.419668
7R129	XUTs	29	30	50	24	0.551007	0.422757
7R131	XUTs	1	1	1	1	0.2697	NA
7R133	XUTs	78	58	50	35	-0.427356	0.428867
7R135	XUTs	23	32	21	14	-0.40822	0.65223
7R144	XUTs	135	125	118	73	-0.203624	0.631434
7R159	XUTs	8	8	4	1	-1.46799	NA
7R165	XUTs	25	14	9	8	-0.932146	0.379191
7R168	XUTs	23	16	16	12	-0.22295	0.852274
7R172	XUTs	48	44	26	20	-0.745192	0.235444
7R173	XUTs	48	49	56	39	0.217856	0.731936
7R174	XUTs	11	4	5	5	-0.309164	NA
7R181	XUTs	36	30	16	14	-0.875277	0.250073
7R184	XUTs	2	1	4	4	1.69005	NA
7R187	XUTs	79	71	23	28	-1.27812	0.0073066
7R19	XUTs	32	24	23	17	-0.23166	0.807527
7R2	XUTs	0	0	2	0	2.55451	NA
7R20	XUTs	104	90	78	59	-0.24772	0.597607
7R21	XUTs	14	13	5	2	-1.71866	NA
7R213	XUTs	38	49	29	19	-0.614418	0.360449
7R228	XUTs	48	49	36	30	-0.296804	0.65654
7R231	XUTs	7	2	2	2	-0.894266	NA
7R238	XUTs	84	72	50	34	-0.644679	0.171833
7R243	XUTs	849	860	839	716	0.125722	0.514261
7R245	XUTs	309	295	268	244	0.0276523	0.94067
7R25	XUTs	11	15	8	12	-0.086587	0.955759
7R255	XUTs	11	6	7	3	-0.538186	NA
7R261	XUTs	50	46	18	13	-1.37889	0.0220666
7R262	XUTs	155	171	164	105	-0.0355823	0.941158
7R264	XUTs	135	121	116	88	-0.0735173	0.882466
7R269	XUTs	81	86	38	28	-1.08772	0.0122995
7R275	XUTs	53	50	26	27	-0.687347	0.25165
7R276	XUTs	2	0	2	1	0.823591	NA
7R295	XUTs	12	6	9	1	-0.670471	NA
7R298	XUTs	12	6	16	14	1.00348	0.356433
7R303	XUTs	0	1	0	0	-1.18958	NA
7R305	XUTs	90	79	47	33	-0.828751	0.0582707
7R308	XUTs	6	7	5	4	-0.275088	NA
7R315	XUTs	366	391	254	185	-0.535886	0.0105804
7R319	XUTs	4	4	3	0	-1.25118	NA
7R322	XUTs	75	84	51	33	-0.676751	0.145025
7R326	XUTs	14	9	7	5	-0.685379	NA
7R328	XUTs	10	7	5	2	-1.05402	NA
7R336	XUTs	8	5	8	7	0.47148	NA
7R340	XUTs	81	88	75	37	-0.366347	0.466899
7R348	XUTs	6	3	0	0	-4.341	NA
7R35	XUTs	7	3	4	3	-0.256562	NA
7R360	XUTs	32	24	16	21	-0.310191	0.740343
7R365	XUTs	395	384	231	181	-0.66346	0.000852977
7R374	XUTs	59	65	66	38	-0.0178609	0.979772
7R383	XUTs	1	2	3	0	0.135454	NA
7R384	XUTs	8	13	1	0	-4.14771	NA
7R404	XUTs	194	181	137	113	-0.325998	0.305028
7R411	XUTs	13	19	18	7	-0.143052	0.922315
7R418	XUTs	247	223	142	81	-0.838353	0.00157366
7R42	XUTs	12	6	9	11	0.439763	NA
7R424	XUTs	0	0	0	0	NA	NA
7R426	XUTs	11	7	6	6	-0.312834	NA
7R43	XUTs	3	11	6	5	-0.0964394	NA
7R433	XUTs	59	52	41	35	-0.285338	0.648708
7R435	XUTs	3	1	2	3	0.623647	NA
7R45	XUTs	33	35	13	8	-1.45141	0.0505978
7R459	XUTs	89	82	66	48	-0.3335	0.483775
7R460	XUTs	4	0	1	0	-1.75631	NA
7R469	XUTs	48	40	47	26	-0.0339823	0.970532
7R483	XUTs	16	23	10	6	-1.04608	0.318197
7R5	XUTs	16	18	3	5	-1.80219	NA
7R51	XUTs	8	8	8	7	0.168856	NA
7R63	XUTs	320	311	244	153	-0.427272	0.0784549
7R7	XUTs	4	2	1	2	-0.692479	NA
7R77	XUTs	71	55	30	24	-0.964318	0.0631127
7R88	XUTs	59	58	10	14	-2.00658	0.00047373
7R9	XUTs	0	0	0	0	NA	NA
7R93	XUTs	41	42	25	18	-0.698292	0.298128
7R97	XUTs	1	1	0	0	-2.17624	NA
8F102	XUTs	5	11	11	7	0.40764	NA
8F104	XUTs	153	136	106	85	-0.33998	0.348509
8F113	XUTs	6	8	3	3	-0.9569	NA
8F117	XUTs	8	7	5	6	-0.16667	NA
8F123	XUTs	1	3	3	0	-0.277194	NA
8F13	XUTs	8	8	3	1	-1.77712	NA
8F130	XUTs	10	19	7	7	-0.786502	0.532489
8F131	XUTs	560	542	544	400	0.0279039	0.922865
8F134	XUTs	10	14	9	3	-0.789193	NA
8F135	XUTs	69	67	45	41	-0.396952	0.454654
8F144	XUTs	1	2	0	0	-2.76634	NA
8F158	XUTs	114	131	69	79	-0.449102	0.273267
8F159	XUTs	29	41	27	27	-0.106453	0.91379
8F162	XUTs	2	2	1	1	-0.732328	NA
8F165	XUTs	4	3	0	0	-3.98139	NA
8F168	XUTs	52	61	36	24	-0.668053	0.240481
8F18	XUTs	12	18	7	4	-1.21021	NA
8F190	XUTs	0	0	0	0	NA	NA
8F193	XUTs	22	16	16	17	0.0724142	0.954351
8F2	XUTs	185	163	145	104	-0.232235	0.501732
8F204	XUTs	27	35	36	22	0.142256	0.87957
8F212	XUTs	27	26	30	11	-0.158124	0.886465
8F22	XUTs	17	16	12	10	-0.325816	0.791049
8F226	XUTs	26	29	14	15	-0.651732	0.446759
8F229	XUTs	58	75	68	44	-0.00619181	0.994015
8F237	XUTs	139	148	82	79	-0.566825	0.0988325
8F239	XUTs	3	4	4	1	-0.288666	NA
8F245	XUTs	1	1	1	1	0.2697	NA
8F246	XUTs	9	10	7	4	-0.550831	NA
8F32	XUTs	5	0	2	2	-0.0377045	NA
8F36	XUTs	74	58	29	15	-1.34804	0.00884863
8F44	XUTs	493	465	508	320	0.0297848	0.926419
8F48	XUTs	36	19	9	6	-1.6222	0.0662447
8F65	XUTs	24	16	28	15	0.338715	0.727847
8F67	XUTs	81	82	38	29	-1.02892	0.0194986
8F72	XUTs	53	41	34	29	-0.315337	0.646944
8F76	XUTs	15	14	11	6	-0.534282	0.673259
8F77	XUTs	189	160	196	151	0.247101	0.434111
8F87	XUTs	77	60	29	28	-0.997072	0.0450476
8F92	XUTs	108	97	88	78	-0.0406832	0.944559
8R10	XUTs	62	84	65	61	0.0523902	0.939855
8R111	XUTs	1	2	3	0	0.135454	NA
8R113	XUTs	67	56	60	55	0.169398	0.777381
8R115	XUTs	111	88	109	73	0.118055	0.815579
8R117	XUTs	22	33	15	16	-0.557096	0.530168
8R118	XUTs	44	62	22	10	-1.50064	0.0122995
8R125	XUTs	17	21	13	10	-0.471568	0.665466
8R129	XUTs	0	0	0	0	NA	NA
8R130	XUTs	146	137	143	96	0.00221247	0.996489
8R135	XUTs	31	29	15	12	-0.895298	0.264293
8R137	XUTs	18	23	28	13	0.222196	0.838368
8R142	XUTs	3	4	3	0	-1.06459	NA
8R157	XUTs	124	110	112	84	-0.00225397	0.996764
8R16	XUTs	2	1	1	0	-1.35157	NA
8R165	XUTs	6	5	5	1	-0.679593	NA
8R171m	XUTs	38	35	31	34	0.109318	0.904829
8R172	XUTs	69	55	42	27	-0.599942	0.274924
8R174	XUTs	85	100	73	55	-0.279549	0.557322
8R189	XUTs	140	145	143	111	0.0883877	0.840333
8R190	XUTs	229	216	181	128	-0.276879	0.355316
8R193	XUTs	136	164	157	135	0.221376	0.537484
8R199	XUTs	48	44	25	23	-0.673975	0.28901
8R214	XUTs	27	25	22	19	-0.0813297	0.941504
8R216	XUTs	7	12	1	3	-1.9465	NA
8R217	XUTs	79	90	84	62	0.0396997	0.949214
8R22	XUTs	13	16	10	8	-0.433035	0.73451
8R221	XUTs	33	40	22	19	-0.572922	0.435756
8R223	XUTs	42	63	23	26	-0.826411	0.177049
8R227	XUTs	74	63	28	28	-1.02153	0.0386158
8R234	XUTs	3	4	1	4	-0.148295	NA
8R241	XUTs	20	12	10	9	-0.485623	0.692217
8R242	XUTs	29	37	48	38	0.636469	0.288281
8R246	XUTs	6	10	4	6	-0.389571	NA
8R247	XUTs	83	75	66	65	7.20924e-06	0.999981
8R253	XUTs	9	9	5	5	-0.579553	NA
8R26	XUTs	78	68	40	42	-0.559107	0.270148
8R47	XUTs	20	14	11	10	-0.429134	0.715131
8R64	XUTs	58	64	34	35	-0.551987	0.32388
8R68	XUTs	32	43	24	8	-1.01857	0.174784
8R76	XUTs	35	35	34	18	-0.196252	0.821181
8R87	XUTs	13	23	44	28	1.23823	0.0603832
8R98	XUTs	35	45	56	28	0.295862	0.671691
9F10	XUTs	77	68	47	43	-0.422902	0.410987
9F104	XUTs	2	5	8	8	1.46032	NA
9F108	XUTs	1	0	0	0	-1.1707	NA
9F111	XUTs	236	218	81	46	-1.59796	3.84061e-09
9F113	XUTs	68	54	62	47	0.0922264	0.894756
9F117	XUTs	5	8	9	2	-0.0539949	NA
9F120	XUTs	34	44	18	16	-0.937927	0.175365
9F122	XUTs	18	17	6	6	-1.27724	0.2475
9F129	XUTs	75	95	123	84	0.52882	0.16566
9F13	XUTs	24	21	20	10	-0.353823	0.730018
9F136	XUTs	30	37	27	29	0.0146445	0.987205
9F138	XUTs	224	221	88	59	-1.35071	2.49971e-07
9F139	XUTs	192	185	90	74	-0.942724	0.000716051
9F143	XUTs	29	23	33	34	0.640289	0.355248
9F152	XUTs	16	8	4	2	-1.75863	NA
9F159	XUTs	27	25	12	11	-0.913066	0.294949
9F171	XUTs	2	4	1	2	-0.70151	NA
9F176	XUTs	32	37	14	12	-1.14953	0.115661
9F185	XUTs	0	0	0	0	NA	NA
9F189	XUTs	199	167	119	97	-0.501872	0.0988325
9F2	XUTs	4314	3480	1323	961	-1.51943	6.88454e-37
9F202	XUTs	9	11	3	1	-2.09767	NA
9F207	XUTs	2	1	1	0	-1.35157	NA
9F210	XUTs	2	0	0	1	-0.638362	NA
9F213	XUTs	77	68	102	79	0.575337	0.139703
9F220	XUTs	27	21	5	4	-2.15749	0.0258785
9F25	XUTs	20	22	7	7	-1.31902	0.183066
9F29	XUTs	2	1	1	2	0.313868	NA
9F31	XUTs	0	0	0	0	NA	NA
9F32	XUTs	16	16	15	5	-0.467702	0.707139
9F38	XUTs	202	235	292	239	0.538597	0.0199598
9F4	XUTs	804	781	339	245	-1.18993	2.2355e-15
9F43	XUTs	2	1	0	0	-2.75605	NA
9F55	XUTs	57	59	17	10	-1.86007	0.000901837
9F57	XUTs	5	12	8	7	0.0762289	NA
9F63	XUTs	0	0	0	0	NA	NA
9F71	XUTs	25	12	7	4	-1.5043	0.178727
9F75	XUTs	1	1	1	1	0.2697	NA
9F9	XUTs	34	38	23	15	-0.677439	0.356246
9F90	XUTs	0	0	0	0	NA	NA
9F91	XUTs	1	6	5	4	0.610654	NA
9F93	XUTs	8	12	10	12	0.417263	0.758506
9F96	XUTs	76	62	39	40	-0.532407	0.312757
9F98	XUTs	96	77	72	44	-0.334634	0.492353
9R104	XUTs	2	0	0	0	-2.16025	NA
9R117	XUTs	39	48	43	39	0.177797	0.805267
9R118	XUTs	4	2	0	0	-3.75604	NA
9R124	XUTs	7	12	6	7	-0.272618	NA
9R141	XUTs	10	12	13	9	0.246693	0.866264
9R145	XUTs	43	76	46	27	-0.471311	0.447239
9R14m	XUTs	8	4	2	0	-2.38969	NA
9R14m2	XUTs	3	3	2	4	0.310552	NA
9R150	XUTs	3	5	1	1	-1.73851	NA
9R167	XUTs	231	184	95	77	-1.01187	0.000220135
9R170	XUTs	6	6	4	13	0.844605	NA
9R175	XUTs	27	24	21	20	-0.0471378	0.967641
9R183	XUTs	14	5	9	5	-0.199068	NA
9R194	XUTs	11	6	4	4	-0.815386	NA
9R2	XUTs	4	4	3	1	-0.785326	NA
9R22	XUTs	5	1	3	3	0.278915	NA
9R35	XUTs	26	37	25	20	-0.231241	0.797408
9R38	XUTs	16	17	9	11	-0.442588	0.711114
9R40	XUTs	3	3	0	0	-3.76121	NA
9R45	XUTs	34	15	10	7	-1.27213	0.183197
9R49	XUTs	3	5	0	0	-4.1801	NA
9R51	XUTs	115	78	58	35	-0.810174	0.0615375
9R53	XUTs	113	140	82	62	-0.561422	0.130123
9R55	XUTs	38	23	18	7	-1.06315	0.204698
9R56	XUTs	27	16	6	10	-1.12895	0.269043
9R63	XUTs	155	135	137	116	0.064385	0.891144
9R77	XUTs	51	66	53	39	-0.0970338	0.895692
9R84	XUTs	9	8	4	3	-1.02632	NA
CUT001	CUTs	134	99	46	31	-1.36077	0.000224323
CUT002	CUTs	65	93	52	48	-0.410013	0.412376
CUT003	CUTs	130	112	57	50	-0.928105	0.00771186
CUT004	CUTs	150	157	138	102	-0.116831	0.769411
CUT005	CUTs	58	45	35	33	-0.344338	0.579405
CUT006	CUTs	4	8	4	6	0.0136232	0.994853
CUT007	CUTs	13	16	8	4	-1.05375	0.377835
CUT008	CUTs	24	28	25	21	0.0686632	0.947546
CUT009	CUTs	70	81	48	35	-0.626135	0.181834
CUT010	CUTs	91	69	62	59	-0.146904	0.791777
CUT011	CUTs	136	106	182	139	0.649741	0.0222906
CUT012	CUTs	145	153	81	46	-1.00611	0.00157833
CUT013	CUTs	54	39	59	56	0.563279	0.268261
CUT014	CUTs	79	55	158	116	1.27177	3.17462e-05
CUT015	CUTs	148	167	221	163	0.523294	0.0457585
CUT016	CUTs	100	77	66	54	-0.314163	0.499226
CUT017	CUTs	301	317	250	193	-0.239275	0.349882
CUT018	CUTs	15	18	6	3	-1.65216	0.144112
CUT019	CUTs	277	263	201	151	-0.377365	0.130809
CUT020	CUTs	74	70	46	36	-0.56989	0.237543
CUT021	CUTs	366	280	346	287	0.219179	0.393297
CUT022	CUTs	60	59	51	22	-0.496403	0.389286
CUT023	CUTs	213	185	390	293	1.01941	1.09077e-07
CUT024	CUTs	228	243	129	86	-0.898848	0.000300756
CUT025	CUTs	393	340	254	185	-0.50095	0.0184419
CUT026	CUTs	215	188	161	120	-0.280135	0.362255
CUT027	CUTs	142	154	124	123	-0.00374158	0.99484
CUT028	CUTs	177	181	169	119	-0.078486	0.841596
CUT029	CUTs	430	360	266	227	-0.430878	0.0451495
CUT030	CUTs	508	447	435	370	0.00277104	0.994099
CUT031	CUTs	28	23	32	17	0.16245	0.866059
CUT032	CUTs	53	61	56	40	-0.0121089	0.988029
CUT033	CUTs	71	49	97	69	0.706208	0.0822419
CUT034	CUTs	146	112	71	51	-0.841376	0.0148441
CUT035	CUTs	110	82	50	36	-0.919148	0.0228601
CUT036	CUTs	12	14	13	8	-0.0806962	0.957162
CUT037	CUTs	131	128	70	47	-0.91242	0.00631107
CUT038	CUTs	120	96	80	82	-0.154121	0.748866
CUT039	CUTs	127	173	217	154	0.539901	0.058675
CUT040	CUTs	174	177	171	114	-0.0685705	0.867375
CUT041	CUTs	179	170	212	188	0.448015	0.0870672
CUT042	CUTs	206	199	260	192	0.397007	0.109395
CUT043	CUTs	106	115	55	57	-0.72284	0.0559456
CUT044	CUTs	170	159	99	85	-0.590338	0.0511735
CUT045	CUTs	55	49	18	15	-1.4104	0.0117683
CUT046	CUTs	291	325	272	219	-0.0837346	0.78501
CUT047	CUTs	417	298	203	140	-0.823292	0.000328646
CUT048	CUTs	115	135	173	114	0.428896	0.184103
CUT049	CUTs	376	424	349	340	0.0422652	0.898662
CUT050	CUTs	175	146	134	80	-0.358289	0.301226
CUT051	CUTs	106	104	26	16	-2.08923	2.67704e-07
CUT052	CUTs	29	29	11	20	-0.614395	0.465724
CUT053	CUTs	55	38	44	28	-0.137125	0.8563
CUT054	CUTs	92	100	83	60	-0.188197	0.689347
CUT055	CUTs	45	43	24	25	-0.5864	0.362819
CUT056	CUTs	26	22	11	16	-0.552291	0.554131
CUT057	CUTs	73	92	49	37	-0.701469	0.114532
CUT058	CUTs	79	97	111	95	0.474102	0.205567
CUT059	CUTs	134	124	94	65	-0.462895	0.196763
CUT060	CUTs	46	50	27	23	-0.694966	0.245676
CUT061	CUTs	148	173	139	104	-0.163243	0.665162
CUT062	CUTs	58	64	56	40	-0.10964	0.867542
CUT063	CUTs	68	66	92	75	0.562734	0.15856
CUT064	CUTs	95	95	77	49	-0.362485	0.407851
CUT065	CUTs	205	217	125	92	-0.721348	0.00587976
CUT066	CUTs	6	7	5	8	0.284517	0.876671
CUT067	CUTs	102	89	106	75	0.159152	0.729102
CUT068	CUTs	20	21	29	17	0.390268	0.657493
CUT069	CUTs	23	21	24	17	0.134897	0.898524
CUT070	CUTs	177	211	216	145	0.126742	0.717541
CUT071	CUTs	62	52	53	40	-0.0526244	0.942374
CUT072	CUTs	33	24	28	15	-0.184369	0.846095
CUT073	CUTs	3	4	3	2	-0.253879	NA
CUT074	CUTs	57	67	69	46	0.122614	0.841926
CUT075	CUTs	146	110	108	90	-0.122529	0.784996
CUT076	CUTs	141	136	90	66	-0.589678	0.0741315
CUT077	CUTs	62	65	68	42	0.0202221	0.977713
CUT078	CUTs	154	163	168	123	0.114141	0.762388
CUT079	CUTs	53	32	45	25	-0.0557631	0.949086
CUT080	CUTs	47	55	75	60	0.647231	0.147092
CUT081	CUTs	110	92	39	29	-1.33001	0.000575129
CUT082	CUTs	43	39	40	31	0.0344049	0.967704
CUT083	CUTs	2	3	1	1	-1.07087	NA
CUT084	CUTs	0	0	0	0	NA	NA
CUT085	CUTs	188	195	83	68	-1.09852	5.39285e-05
CUT086	CUTs	139	127	88	60	-0.610955	0.0716002
CUT087	CUTs	212	197	81	71	-1.17942	8.88923e-06
CUT088	CUTs	216	219	134	92	-0.710253	0.00607645
CUT089	CUTs	14	15	2	10	-0.945116	0.460812
CUT090	CUTs	368	410	459	342	0.280123	0.184453
CUT091	CUTs	183	188	31	28	-2.40574	2.69041e-14
CUT092	CUTs	364	315	270	175	-0.378745	0.109377
CUT093	CUTs	156	193	185	112	-0.00906756	0.986163
CUT094	CUTs	34	18	41	28	0.644997	0.352653
CUT095	CUTs	114	103	57	43	-0.876901	0.0169302
CUT096	CUTs	141	115	26	14	-2.44803	3.86112e-10
CUT097	CUTs	54	41	33	28	-0.390551	0.543088
CUT098	CUTs	129	127	138	95	0.0984085	0.819506
CUT099	CUTs	43	40	37	26	-0.161412	0.831046
CUT100	CUTs	32	29	35	36	0.479324	0.464907
CUT101	CUTs	69	41	42	22	-0.559103	0.362255
CUT102	CUTs	23	24	8	13	-0.882341	0.339879
CUT103	CUTs	47	68	42	42	-0.198117	0.761445
CUT104	CUTs	18	11	11	3	-0.855535	0.487814
CUT105	CUTs	224	229	162	110	-0.502482	0.056474
CUT106	CUTs	99	98	86	69	-0.102135	0.840078
CUT107	CUTs	28	28	12	16	-0.72914	0.378836
CUT108	CUTs	117	92	95	56	-0.242538	0.593217
CUT109	CUTs	363	344	256	197	-0.400657	0.0649743
CUT110	CUTs	183	173	82	73	-0.949993	0.000789449
CUT111	CUTs	104	117	47	36	-1.17272	0.00131656
CUT112	CUTs	109	123	94	72	-0.242822	0.558413
CUT113	CUTs	165	145	81	84	-0.649827	0.0441135
CUT114	CUTs	193	143	182	140	0.181713	0.602795
CUT115	CUTs	73	51	74	46	0.182532	0.755287
CUT116	CUTs	55	55	71	52	0.399229	0.418562
CUT117	CUTs	2122	1910	985	770	-0.956839	3.14856e-16
CUT118	CUTs	191	154	107	59	-0.832169	0.00704722
CUT119	CUTs	109	77	37	38	-1.05096	0.0124574
CUT120	CUTs	6	4	6	4	0.234974	0.913623
CUT121	CUTs	96	84	62	53	-0.398166	0.37032
CUT122	CUTs	9	6	5	7	-0.0432795	0.984756
CUT123	CUTs	28	25	20	10	-0.601972	0.479312
CUT124	CUTs	29	24	23	18	-0.127036	0.900391
CUT125	CUTs	74	85	44	26	-0.957158	0.0311437
CUT126	CUTs	17	13	7	9	-0.636265	0.591582
CUT127	CUTs	30	36	17	14	-0.846662	0.251063
CUT128	CUTs	37	21	11	12	-1.07137	0.192981
CUT129	CUTs	185	168	248	185	0.534356	0.0277831
CUT130	CUTs	34	19	17	17	-0.380224	0.678583
CUT131	CUTs	76	74	94	66	0.328656	0.451451
CUT132	CUTs	125	119	75	57	-0.645538	0.0655501
CUT133	CUTs	144	130	98	74	-0.431032	0.217146
CUT134	CUTs	188	172	209	151	0.237577	0.432175
CUT135	CUTs	340	333	563	420	0.785602	1.65356e-06
CUT136	CUTs	58	55	25	11	-1.43401	0.00905968
CUT137	CUTs	4183	4041	2900	2083	-0.487275	7.8524e-06
CUT138	CUTs	258	257	93	79	-1.33581	2.16175e-08
CUT139	CUTs	19	23	20	13	-0.117664	0.917359
CUT140	CUTs	34	29	28	19	-0.187777	0.828698
CUT141	CUTs	33	24	23	22	-0.0848773	0.935114
CUT142	CUTs	232	209	124	76	-0.911845	0.000466954
CUT143	CUTs	342	381	229	174	-0.603623	0.00394148
CUT144	CUTs	610	558	442	391	-0.235829	0.247351
CUT145	CUTs	82	56	38	35	-0.664669	0.191242
CUT146	CUTs	2137	2136	1604	1404	-0.254609	0.0721023
CUT147	CUTs	1109	1139	780	535	-0.541174	0.000137543
CUT148	CUTs	355	321	306	217	-0.133823	0.618098
CUT149	CUTs	198	240	173	124	-0.325178	0.277616
CUT150	CUTs	6934	6699	5684	4325	-0.205394	0.077877
CUT151	CUTs	168	147	126	105	-0.200434	0.580438
CUT152	CUTs	12	10	7	2	-1.09081	0.44281
CUT153	CUTs	161	189	83	64	-1.01136	0.000474072
CUT154	CUTs	36	39	40	36	0.269583	0.690123
CUT155	CUTs	69	53	44	35	-0.382159	0.488541
CUT156	CUTs	129	94	108	78	-0.0225812	0.967803
CUT157	CUTs	2	5	2	0	-1.65194	NA
CUT158	CUTs	240	260	162	138	-0.490009	0.0529263
CUT159	CUTs	182	174	221	155	0.314142	0.272609
CUT160	CUTs	682	649	536	433	-0.212954	0.260605
CUT161	CUTs	40	64	41	20	-0.558056	0.376934
CUT162	CUTs	1	1	1	0	-0.787115	NA
CUT163	CUTs	195	210	231	150	0.141204	0.669369
CUT164	CUTs	142	131	130	98	-0.0194603	0.968124
CUT165	CUTs	27	30	16	3	-1.40251	0.104803
CUT166	CUTs	85	83	36	13	-1.57061	0.000640905
CUT167	CUTs	57	60	36	28	-0.628927	0.242612
CUT168	CUTs	117	116	58	38	-1.04632	0.00305162
CUT169	CUTs	30	47	35	27	-0.0740367	0.935554
CUT170	CUTs	81	81	56	39	-0.534413	0.241173
CUT171	CUTs	68	43	75	49	0.392997	0.451255
CUT172	CUTs	36	42	18	11	-1.1983	0.0701593
CUT173	CUTs	417	417	393	250	-0.147292	0.561546
CUT174	CUTs	64	58	23	12	-1.57661	0.00257018
CUT175	CUTs	263	211	237	194	0.109686	0.737264
CUT176	CUTs	72	76	35	27	-1.01431	0.0250321
CUT177	CUTs	14	17	22	21	0.72609	0.393142
CUT178	CUTs	93	66	60	33	-0.549798	0.259016
CUT179	CUTs	122	82	117	85	0.225652	0.602898
CUT180	CUTs	551	472	420	295	-0.280889	0.17837
CUT181	CUTs	626	507	319	275	-0.68104	0.000197915
CUT182	CUTs	193	176	147	95	-0.377512	0.225254
CUT183	CUTs	45	55	64	38	0.252317	0.673314
CUT184	CUTs	30	29	8	6	-1.8349	0.022405
CUT185	CUTs	6	12	6	5	-0.469082	0.776012
CUT186	CUTs	60	66	57	37	-0.192137	0.74793
CUT187	CUTs	72	62	43	43	-0.382281	0.466926
CUT188	CUTs	645	458	530	299	-0.195062	0.719117
CUT189	CUTs	135	125	104	66	-0.382754	0.301226
CUT190	CUTs	70	82	119	72	0.553856	0.154771
CUT191	CUTs	201	168	58	40	-1.67545	1.07946e-08
CUT192	CUTs	4	1	4	1	0.188539	NA
CUT193	CUTs	74	85	101	78	0.411528	0.309753
CUT194	CUTs	89	71	100	57	0.196111	0.695882
CUT195	CUTs	27	25	17	16	-0.403053	0.650824
CUT196	CUTs	75	84	53	49	-0.389216	0.417085
CUT197	CUTs	387	386	238	173	-0.673682	0.000622907
CUT198	CUTs	61	59	109	88	0.959769	0.00565478
CUT199	CUTs	100	73	56	34	-0.712845	0.10699
CUT200	CUTs	314	274	189	172	-0.450825	0.0630757
CUT201	CUTs	33	29	23	18	-0.353694	0.664699
CUT202	CUTs	67	66	48	25	-0.645582	0.207742
CUT203	CUTs	10	9	3	3	-1.40935	0.362177
CUT204	CUTs	76	68	50	39	-0.451522	0.362177
CUT205	CUTs	197	199	159	136	-0.176954	0.589521
CUT206	CUTs	151	117	88	80	-0.420635	0.255084
CUT207	CUTs	121	167	98	62	-0.621034	0.0772796
CUT208	CUTs	31	36	25	16	-0.478474	0.529128
CUT209	CUTs	11	13	10	15	0.340532	0.786231
CUT210	CUTs	7	11	5	5	-0.595462	0.709779
CUT211	CUTs	106	68	101	86	0.354804	0.409156
CUT212	CUTs	25	25	11	4	-1.52704	0.084423
CUT213	CUTs	46	59	37	22	-0.606339	0.302686
CUT214	CUTs	207	206	226	133	0.0211711	0.9619
CUT215	CUTs	69	52	53	26	-0.398222	0.490456
CUT216	CUTs	171	129	125	87	-0.264174	0.473583
CUT217	CUTs	124	106	129	74	0.0432606	0.936778
CUT218	CUTs	101	101	63	55	-0.527139	0.190728
CUT219	CUTs	63	100	47	38	-0.698359	0.140989
CUT220	CUTs	54	61	20	21	-1.23223	0.0204297
CUT221	CUTs	4662	4429	3103	2362	-0.493594	2.47716e-06
CUT222	CUTs	2904	2350	1628	1154	-0.681246	2.10587e-07
CUT223	CUTs	2906	2479	738	533	-1.84512	1.78091e-53
CUT224	CUTs	4	11	6	3	-0.525165	0.776463
CUT225	CUTs	26	18	21	14	-0.0951303	0.935554
CUT226	CUTs	1498	1531	1514	1158	0.0595537	0.747218
CUT227	CUTs	107	110	140	80	0.241462	0.554783
CUT228	CUTs	176	142	111	89	-0.423907	0.200884
CUT229	CUTs	65	50	65	56	0.323372	0.534991
CUT230	CUTs	0	1	0	1	0.338483	NA
CUT231	CUTs	164	155	109	90	-0.435027	0.175868
CUT232	CUTs	22	8	7	9	-0.630072	0.615037
CUT233	CUTs	446	400	588	393	0.445036	0.0152445
CUT234	CUTs	123	109	136	108	0.316733	0.369494
CUT235	CUTs	287	324	301	209	-0.0273605	0.94008
CUT236	CUTs	71	96	92	85	0.335454	0.440465
CUT237	CUTs	156	137	155	89	-0.0408412	0.935266
CUT238	CUTs	0	4	2	0	-0.876866	NA
CUT239	CUTs	1	3	1	0	-1.78825	NA
CUT240	CUTs	4	8	1	1	-2.33951	NA
CUT241	CUTs	21	28	22	14	-0.216307	0.827478
CUT242	CUTs	3	1	3	0	-0.276102	NA
CUT243	CUTs	0	0	0	0	NA	NA
CUT244	CUTs	2	2	1	0	-1.78102	NA
CUT245	CUTs	5	2	0	0	-3.99024	NA
CUT246	CUTs	378	382	310	217	-0.293364	0.194942
CUT247	CUTs	24	35	48	41	0.839175	0.136402
CUT248	CUTs	85	80	53	49	-0.441671	0.340634
CUT249	CUTs	219	265	129	123	-0.688253	0.00888405
CUT250	CUTs	108	110	76	65	-0.381333	0.34481
CUT251	CUTs	74	74	68	42	-0.199916	0.713454
CUT252	CUTs	121	95	26	16	-2.12845	1.89285e-07
CUT253	CUTs	117	122	34	28	-1.70278	2.487e-06
CUT254	CUTs	126	128	103	92	-0.130992	0.762388
CUT255	CUTs	111	93	113	94	0.268388	0.494403
CUT256	CUTs	48	48	26	20	-0.820235	0.163796
CUT257	CUTs	48	62	21	22	-1.09971	0.0455654
CUT258	CUTs	28	31	15	6	-1.27953	0.108661
CUT259	CUTs	61	77	69	57	0.112975	0.849069
CUT260	CUTs	217	196	144	93	-0.569896	0.038694
CUT261	CUTs	49	47	18	16	-1.24912	0.0317528
CUT262	CUTs	187	160	173	128	0.0344739	0.937575
CUT263	CUTs	113	117	62	52	-0.766895	0.0321258
CUT264	CUTs	58	65	87	74	0.635533	0.115534
CUT265	CUTs	106	94	47	28	-1.18584	0.00229566
CUT266	CUTs	28	15	26	12	0.0359605	0.977713
CUT267	CUTs	117	99	123	76	0.109984	0.817211
CUT268	CUTs	119	117	68	65	-0.573448	0.119737
CUT269	CUTs	385	326	259	200	-0.388792	0.0831915
CUT270	CUTs	233	264	199	171	-0.178112	0.557989
CUT271	CUTs	77	60	87	101	0.728138	0.0632404
CUT272	CUTs	51	57	36	34	-0.373257	0.531644
CUT273	CUTs	248	216	274	218	0.328902	0.188248
CUT274	CUTs	258	245	243	183	0.000392625	0.998741
CUT275	CUTs	41	32	25	15	-0.638523	0.370595
CUT276	CUTs	48	50	21	13	-1.29653	0.0250321
CUT277	CUTs	19	9	3	3	-1.96575	0.132908
CUT278	CUTs	265	301	316	221	0.157797	0.570525
CUT279	CUTs	103	114	58	45	-0.834103	0.0240564
CUT280	CUTs	197	175	106	78	-0.776161	0.005287
CUT281	CUTs	560	583	235	176	-1.23636	2.24442e-13
CUT282	CUTs	278	278	153	99	-0.91051	7.68051e-05
CUT283	CUTs	93	88	102	53	-0.00675235	0.99246
CUT284	CUTs	58	52	65	32	0.0331883	0.966245
CUT285	CUTs	52	44	23	9	-1.37351	0.0242438
CUT286	CUTs	185	152	107	77	-0.634474	0.0356667
CUT287	CUTs	109	90	41	28	-1.29147	0.000942288
CUT288	CUTs	66	67	59	34	-0.291856	0.595913
CUT289	CUTs	185	170	201	152	0.232417	0.44383
CUT290	CUTs	212	251	230	178	0.0579839	0.874661
CUT291	CUTs	237	257	143	112	-0.712355	0.00342301
CUT292	CUTs	82	68	98	62	0.322905	0.470031
CUT293	CUTs	19	27	37	13	0.311711	0.740441
CUT294	CUTs	24	27	16	5	-1.08171	0.2249
CUT295	CUTs	542	475	395	288	-0.335954	0.0877902
CUT296	CUTs	56	41	16	18	-1.25026	0.0355089
CUT297	CUTs	65	43	43	36	-0.202177	0.760649
CUT298	CUTs	19	31	32	26	0.456002	0.553944
CUT299	CUTs	184	140	118	106	-0.279541	0.434364
CUT300	CUTs	125	128	200	149	0.702943	0.00734694
CUT301	CUTs	353	304	186	138	-0.779892	0.000265593
CUT302	CUTs	27	19	7	6	-1.57484	0.0877902
CUT303	CUTs	343	255	213	143	-0.514022	0.0415593
CUT304	CUTs	77	47	34	27	-0.777213	0.149825
CUT305	CUTs	60	63	61	52	0.124893	0.835786
CUT306	CUTs	8024	7017	4141	3241	-0.783049	4.66404e-14
CUT307	CUTs	678	651	369	270	-0.818271	1.9913e-07
CUT308	CUTs	541	393	103	69	-2.20441	1.64685e-23
CUT309	CUTs	71	43	49	39	-0.126982	0.856363
CUT310	CUTs	193	189	105	61	-0.976666	0.000491485
CUT311	CUTs	336	321	500	343	0.592746	0.00113289
CUT312	CUTs	20	17	9	7	-0.966676	0.349714
CUT313	CUTs	80	91	58	62	-0.25034	0.615037
CUT314	CUTs	59	84	67	41	-0.180234	0.760052
CUT315	CUTs	8	14	6	6	-0.622517	0.664503
CUT316	CUTs	214	189	146	111	-0.407742	0.157691
CUT317	CUTs	121	116	46	39	-1.23304	0.000424165
CUT318	CUTs	57	61	50	38	-0.18318	0.767278
CUT319	CUTs	89	82	59	32	-0.687661	0.118825
CUT320	CUTs	118	90	150	84	0.391396	0.308844
CUT321	CUTs	69	53	75	50	0.268752	0.608063
CUT322	CUTs	220	186	150	122	-0.332097	0.270183
CUT323	CUTs	114	119	126	93	0.148873	0.720298
CUT324	CUTs	4	6	0	0	-4.51403	NA
CUT325	CUTs	262	208	81	54	-1.56412	2.84479e-09
CUT326	CUTs	155	178	173	106	-0.0298687	0.94867
CUT327	CUTs	46	39	28	13	-0.83568	0.201714
CUT328	CUTs	76	51	63	43	-0.0245505	0.973743
CUT329	CUTs	67	64	49	52	-0.113998	0.85871
CUT330	CUTs	109	99	134	106	0.450027	0.183721
CUT331	CUTs	53	47	46	33	-0.102295	0.889567
CUT332	CUTs	180	157	94	84	-0.670001	0.0253637
CUT333	CUTs	44	26	35	19	-0.150834	0.867375
CUT334	CUTs	17	20	14	10	-0.38845	0.719949
CUT335	CUTs	135	130	206	135	0.594327	0.0310734
CUT336	CUTs	27	34	11	12	-1.15025	0.135764
CUT337	CUTs	1660	1599	1101	806	-0.535521	1.65021e-05
CUT338	CUTs	68	55	44	34	-0.414332	0.445889
CUT339	CUTs	21	29	12	10	-0.941255	0.280675
CUT340	CUTs	263	221	263	189	0.138998	0.646962
CUT341	CUTs	60	31	43	31	-0.0571559	0.947546
[truncated: 8,432 more rows]

## Sheet: E) rpb4∆ vs. WT 
Name	Type	WT (BY4741)_rep1_counts	WT (BY4741)_rep2_counts	rpb4∆ (Y01285)_rep1_counts	rpb4∆ (Y01285)_rep2_counts	Log2(FC) rpb4∆ vs. WT	P-adj
10F134	XUTs	6	5	8	0	2.40894	0.0968874
10F136	XUTs	75	114	10	4	-0.850914	0.284964
10F143	XUTs	6	4	3	1	1.65834	0.359461
10F149	XUTs	42	43	1	0	-3.43408	0.0662794
10F15	XUTs	50	36	21	16	1.80508	0.000649899
10F151	XUTs	11	8	0	2	-0.113507	0.961741
10F158	XUTs	77	66	0	0	-5.58575	0.0014188
10F170	XUTs	32	21	0	0	-4.12262	0.0472259
10F174	XUTs	1	0	0	0	1.64432	NA
10F179	XUTs	1	0	0	0	1.64432	NA
10F18	XUTs	13	9	0	3	0.277852	0.891034
10F183	XUTs	28	26	0	0	-4.19012	0.0415998
10F200	XUTs	7	0	0	0	-0.993537	NA
10F203	XUTs	69	54	14	8	0.512513	0.474927
10F209	XUTs	0	0	0	0	NA	NA
10F213	XUTs	2	1	0	0	0.0508508	NA
10F22	XUTs	0	1	0	0	1.38838	NA
10F25	XUTs	20	28	2	2	-0.625332	0.681012
10F253	XUTs	10	20	0	0	-3.42687	0.156407
10F293	XUTs	2	8	0	0	-1.89985	NA
10F300	XUTs	1	0	0	0	1.64432	NA
10F305	XUTs	10	8	0	0	-2.58768	0.3803
10F310	XUTs	3	3	0	0	-1.0288	NA
10F32	XUTs	24	23	0	3	-0.881057	0.588788
10F321	XUTs	29	12	1	3	-0.214063	0.898416
10F324	XUTs	3	0	0	0	0.224321	NA
10F326	XUTs	6	16	0	0	-3.00618	0.263807
10F37	XUTs	2	0	0	0	0.801281	NA
10F42	XUTs	237	178	14	18	-0.654137	0.190919
10F44	XUTs	57	26	0	3	-1.63861	0.23816
10F48	XUTs	47	29	19	7	1.44371	0.0292151
10F49	XUTs	38	21	2	0	-1.88974	0.270746
10F50	XUTs	0	1	0	0	1.38838	NA
10F55	XUTs	178	101	19	12	-0.133457	0.833637
10F57	XUTs	5	6	0	0	-1.92434	NA
10F6	XUTs	3	4	0	0	-1.2841	NA
10F62	XUTs	129	100	17	13	0.0806706	0.902797
10F65	XUTs	12	25	0	0	-3.73357	0.100163
10F67	XUTs	0	7	0	0	-1.47136	NA
10F68	XUTs	18	22	0	0	-3.789	0.0872516
10F73	XUTs	15	13	3	1	0.152918	0.934054
10F76	XUTs	9	15	1	0	-1.67513	0.507098
10F82	XUTs	13	10	2	0	-0.596359	0.797514
10F85	XUTs	102	56	4	2	-1.6828	0.0753691
10F86	XUTs	348	311	27	23	-0.718534	0.0704999
10F87	XUTs	17	13	0	0	-3.31936	0.173246
10F9	XUTs	13	1	0	1	-0.542137	0.865172
10R101	XUTs	25	33	0	0	-4.33384	0.0322765
10R114	XUTs	75	59	7	2	-0.924512	0.317076
10R116	XUTs	19	12	0	0	-3.34448	0.167938
10R117	XUTs	18	11	1	1	-0.808569	0.696227
10R119	XUTs	6	6	1	0	-0.625384	0.843991
10R125	XUTs	1	1	0	0	0.556988	NA
10R128	XUTs	281	149	17	15	-0.686017	0.17097
10R131	XUTs	6	6	0	1	-0.532139	0.861975
10R136	XUTs	42	21	2	0	-1.972	0.243547
10R143	XUTs	0	0	0	0	NA	NA
10R155	XUTs	33	19	3	0	-1.14595	0.483661
10R165	XUTs	20	40	2	0	-2.05865	0.229168
10R181	XUTs	82	38	0	1	-3.81552	0.0322523
10R186	XUTs	302	315	18	16	-1.19695	0.0065364
10R197	XUTs	15	10	2	0	-0.698548	0.757658
10R203	XUTs	30	31	0	0	-4.37847	0.0286868
10R206	XUTs	89	60	13	14	0.584921	0.357002
10R209	XUTs	33	24	9	3	0.72635	0.468281
10R21	XUTs	17	12	3	0	-0.343805	0.865172
10R212	XUTs	42	35	9	7	0.740414	0.371866
10R228	XUTs	5	3	0	0	-1.38443	NA
10R233	XUTs	470	304	12	9	-2.17279	1.3677e-06
10R234	XUTs	4	0	0	0	-0.186803	NA
10R237	XUTs	71	36	6	5	-0.219306	0.829236
10R242	XUTs	66	56	10	11	0.487046	0.505364
10R245	XUTs	5	2	0	0	-1.14778	NA
10R248	XUTs	0	0	0	0	NA	NA
10R249	XUTs	322	282	83	48	0.775216	0.0108445
10R254	XUTs	43	18	2	1	-1.28314	0.399355
10R257	XUTs	15	7	0	0	-2.81596	0.310435
10R258	XUTs	0	0	0	0	NA	NA
10R276	XUTs	323	241	7	11	-1.92917	0.000134928
10R284	XUTs	2	1	0	0	0.0508508	NA
10R287	XUTs	132	105	26	17	0.538733	0.284964
10R288	XUTs	22	15	6	1	0.552125	0.691315
10R29	XUTs	11	8	1	0	-1.24831	0.648624
10R39	XUTs	55	42	3	1	-1.61266	0.180398
10R50	XUTs	2	0	0	0	0.801281	NA
10R52	XUTs	88	85	13	8	-0.0656569	0.935249
10R6	XUTs	16	5	0	0	-2.70848	0.347398
10R61	XUTs	12	12	0	0	-3.02885	0.247464
10R62	XUTs	0	0	0	0	NA	NA
10R63	XUTs	1	1	2	0	2.86539	NA
10R78	XUTs	6	1	0	0	-1.07415	NA
10R84	XUTs	321	241	80	58	0.987887	0.000429176
10R89	XUTs	11	5	1	0	-0.951942	0.747093
10R92	XUTs	33	36	12	5	0.920574	0.269764
10R93	XUTs	2	5	0	0	-1.34788	NA
11F10	XUTs	110	73	7	9	-0.460061	0.542315
11F102	XUTs	2	5	1	0	0.0579142	NA
11F103	XUTs	4	9	0	0	-2.23153	NA
11F113	XUTs	5	14	1	0	-1.38926	0.608006
11F136	XUTs	0	0	0	0	NA	NA
11F137	XUTs	0	0	0	0	NA	NA
11F153	XUTs	22	16	0	0	-3.65454	0.106473
11F155	XUTs	18	28	2	2	-0.574561	0.711878
11F16	XUTs	8	6	0	1	-0.726437	0.805113
11F160	XUTs	0	0	0	0	NA	NA
11F176	XUTs	15	8	0	1	-1.41705	0.578004
11F183	XUTs	502	314	53	25	-0.378199	0.311435
11F187	XUTs	1	1	1	0	1.95504	NA
11F191	XUTs	13	13	1	0	-1.73358	0.483661
11F200	XUTs	724	459	65	54	-0.272078	0.386575
11F204	XUTs	25	4	1	0	-1.71655	0.503204
11F205	XUTs	0	0	0	0	NA	NA
11F207	XUTs	18	10	0	2	-0.656157	0.757442
11F209	XUTs	92	50	8	11	0.183398	0.822545
11F210	XUTs	32	15	4	2	0.0740274	0.960325
11F216	XUTs	4	9	1	0	-0.824457	0.787933
11F230	XUTs	1414	1232	246	189	0.395983	0.0651958
11F231	XUTs	50	43	11	3	0.216986	0.826491
11F244	XUTs	100	73	6	5	-0.952963	0.230029
11F25	XUTs	390	243	23	10	-1.24925	0.0037084
11F252	XUTs	1	0	1	1	4.06706	0.173338
11F258	XUTs	99	76	17	22	0.883873	0.090182
11F259	XUTs	0	0	0	0	NA	NA
11F26	XUTs	242	196	5	4	-2.59862	6.59439e-05
11F264	XUTs	202	134	41	32	0.829275	0.0267425
11F265	XUTs	1	0	0	1	3.17243	NA
11F27	XUTs	20	24	2	2	-0.482524	0.7589
11F270	XUTs	0	0	0	0	NA	NA
11F272	XUTs	39	19	22	7	2.00027	0.00237768
11F281	XUTs	0	0	0	0	NA	NA
11F288	XUTs	23	24	0	0	-4.00345	0.0595326
11F290	XUTs	26	14	2	3	0.0869811	0.956811
11F292	XUTs	0	0	0	0	NA	NA
11F298	XUTs	12	10	0	0	-2.88197	0.288747
11F3	XUTs	16	27	15	13	2.33714	0.000483666
11F300	XUTs	0	0	0	0	NA	NA
11F35	XUTs	21	8	0	0	-3.19332	0.2069
11F36	XUTs	45	56	6	6	-0.0976551	0.926896
11F43	XUTs	0	0	0	0	NA	NA
11F58	XUTs	27	30	1	1	-1.85486	0.265393
11F64	XUTs	92	59	25	22	1.35909	0.00335957
11F68	XUTs	4	0	2	2	3.17401	0.106473
11F77	XUTs	141	110	29	24	0.774597	0.0782607
11F8	XUTs	0	0	0	0	NA	NA
11F84	XUTs	0	0	0	0	NA	NA
11F87	XUTs	35	19	10	3	0.942466	0.331548
11F88	XUTs	21	12	1	1	-0.988264	0.617057
11F90	XUTs	101	85	15	5	-0.255099	0.73946
11R107	XUTs	23	41	1	0	-3.08916	0.119806
11R109	XUTs	22	26	0	0	-4.04821	0.0552959
11R112	XUTs	2	1	0	0	0.0508508	NA
11R114	XUTs	167	108	43	31	1.13517	0.00221651
11R117	XUTs	105	67	16	16	0.624468	0.280327
11R12	XUTs	84	51	24	8	0.912127	0.133039
11R124	XUTs	395	272	75	50	0.601626	0.0438759
11R125	XUTs	86	36	3	0	-2.31708	0.070086
11R128	XUTs	7	7	0	0	-2.25124	NA
11R13	XUTs	45	10	1	2	-1.01937	0.53354
11R130	XUTs	41	38	13	13	1.41132	0.0258565
11R134	XUTs	36	41	4	5	-0.099986	0.933124
11R139	XUTs	1	0	2	0	3.91137	NA
11R142	XUTs	0	0	0	0	NA	NA
11R146	XUTs	11	8	0	0	-2.65454	0.358777
11R158	XUTs	11	14	3	1	0.274332	0.879495
11R163	XUTs	19	13	10	10	2.36715	0.00147874
11R166	XUTs	27	17	3	0	-0.919926	0.593975
11R167	XUTs	2	3	0	0	-0.811569	NA
11R171	XUTs	40	23	2	6	0.139118	0.912848
11R173	XUTs	25	29	3	2	-0.471728	0.738791
11R192	XUTs	17	16	0	0	-3.4812	0.138636
11R2	XUTs	19	9	8	7	2.16656	0.0127074
11R208	XUTs	0	0	0	0	NA	NA
11R209	XUTs	0	0	0	0	NA	NA
11R223	XUTs	47	35	8	5	0.349226	0.716134
11R226	XUTs	108	171	14	5	-0.984796	0.148753
11R246	XUTs	3	1	0	0	-0.32255	NA
11R247	XUTs	2	5	1	0	0.0579142	NA
11R249	XUTs	18	11	0	0	-3.24449	0.190919
11R260	XUTs	56	47	3	6	-0.466846	0.647873
11R262	XUTs	47	47	11	11	0.909298	0.193849
11R265	XUTs	5	8	0	0	-2.1972	NA
11R267	XUTs	9	8	3	0	0.387976	0.861709
11R270	XUTs	0	0	0	0	NA	NA
11R273	XUTs	136	91	6	9	-0.86028	0.214272
11R274	XUTs	18	6	0	0	-2.90719	0.285873
11R39	XUTs	11	20	3	2	0.284454	0.861673
11R48	XUTs	0	0	0	0	NA	NA
11R53	XUTs	0	0	0	0	NA	NA
11R63	XUTs	45	31	1	0	-3.22759	0.0915243
11R7	XUTs	0	0	0	0	NA	NA
11R8	XUTs	3	4	0	0	-1.2841	NA
11R81	XUTs	37	31	2	1	-1.51428	0.290451
11R82	XUTs	7	10	0	0	-2.57196	0.386601
11R92	XUTs	11	5	0	1	-0.867306	0.762428
11R94	XUTs	40	41	1	0	-3.36504	0.0742841
11R97	XUTs	0	0	0	0	NA	NA
12F1	XUTs	2	6	1	0	-0.149827	NA
12F109	XUTs	130	142	1	2	-3.51826	0.000826833
12F113	XUTs	22	32	0	1	-2.78171	0.171533
12F121	XUTs	4	9	0	0	-2.23153	NA
12F134	XUTs	19	14	2	1	-0.460625	0.80306
12F142	XUTs	40	35	2	3	-0.87995	0.476441
12F150	XUTs	37	29	3	1	-1.06456	0.435884
12F154	XUTs	21	13	0	2	-0.955986	0.626714
12F157	XUTs	117	96	9	7	-0.728258	0.294703
12F159	XUTs	24	24	5	2	0.174428	0.898416
12F16	XUTs	30	21	2	0	-1.70965	0.336966
12F160	XUTs	2	0	0	0	0.801281	NA
12F165	XUTs	14	5	1	0	-1.17425	0.677021
12F180	XUTs	6	5	0	0	-1.88197	NA
12F184	XUTs	20	22	3	0	-0.916805	0.597715
12F185	XUTs	6	14	2	0	-0.517148	0.8316
12F188	XUTs	1404	809	149	210	0.496833	0.430856
12F191	XUTs	122	86	14	11	-0.0318667	0.964539
12F193	XUTs	29	28	1	0	-2.85413	0.158747
12F198	XUTs	22	9	0	2	-0.772692	0.710512
12F208	XUTs	244	227	12	2	-2.12456	0.000295257
12F209	XUTs	54	44	0	1	-3.58572	0.0483218
12F215	XUTs	2	1	0	0	0.0508508	NA
12F216	XUTs	4	4	0	0	-1.44386	NA
12F221	XUTs	16	9	1	0	-1.61278	0.525114
12F231	XUTs	79	45	18	22	1.44555	0.00503062
12F236	XUTs	9	8	1	0	-1.11157	0.695324
12F239	XUTs	1	0	0	0	1.64432	NA
12F247	XUTs	3	5	0	0	-1.50099	NA
12F253	XUTs	3	3	0	0	-1.0288	NA
12F257	XUTs	28	32	1	0	-2.94716	0.140555
12F270	XUTs	33	7	1	0	-2.19501	0.345201
12F272	XUTs	9	3	0	0	-1.90728	NA
12F287	XUTs	6	7	2	1	0.83261	0.686011
12F289	XUTs	28	14	3	1	-0.369719	0.823269
12F293	XUTs	48	26	0	2	-2.09359	0.182516
12F317	XUTs	6	12	1	1	-0.242965	0.920353
12F33	XUTs	0	0	0	0	NA	NA
12F336	XUTs	11	24	1	2	-0.596092	0.741419
12F347	XUTs	69	48	5	7	-0.229787	0.810426
12F359	XUTs	27	16	1	2	-0.759118	0.649213
12F361	XUTs	0	1	0	0	1.38838	NA
12F375	XUTs	0	3	0	0	-0.247808	NA
12F394	XUTs	31	28	3	1	-0.920083	0.516691
12F4	XUTs	1	0	0	0	1.64432	NA
12F404	XUTs	87	67	8	4	-0.687973	0.405971
12F46	XUTs	0	0	0	0	NA	NA
12F54	XUTs	18	13	0	1	-1.88946	0.417363
12F56	XUTs	11	13	2	3	0.74656	0.625874
12F6	XUTs	161	120	10	10	-0.783469	0.194497
12F68	XUTs	15	15	0	0	-3.35078	0.167006
12F70	XUTs	29	18	3	7	0.870257	0.412673
12F77	XUTs	80	84	12	9	0.0130962	0.985984
12F82	XUTs	1	4	1	1	1.57601	0.542127
12F84	XUTs	59	48	6	2	-0.769207	0.450452
12F85	XUTs	108	108	7	3	-1.47206	0.0530814
12F86	XUTs	14	15	0	0	-3.3099	0.176415
12F87	XUTs	1	0	0	0	1.64432	NA
12F9	XUTs	1	0	0	0	1.64432	NA
12F90	XUTs	610	474	22	26	-1.46531	2.18437e-05
12F94	XUTs	23	12	1	0	-2.08615	0.368059
12F96	XUTs	0	0	0	0	NA	NA
12F98	XUTs	171	134	6	7	-1.52642	0.0164313
12R107	XUTs	28	22	4	1	-0.358786	0.81007
12R113	XUTs	135	133	19	16	0.0552706	0.931985
12R126	XUTs	12	13	1	4	0.744634	0.627081
12R135	XUTs	0	0	0	0	NA	NA
12R137	XUTs	1	0	0	0	1.64432	NA
12R141	XUTs	21	9	0	3	-0.126017	0.950183
12R144	XUTs	6	3	1	1	0.902589	0.717566
12R149	XUTs	0	0	0	0	NA	NA
12R16	XUTs	4	8	0	0	-2.10466	NA
12R162	XUTs	13	5	0	0	-2.50626	0.408182
12R167	XUTs	2	0	0	0	0.801281	NA
12R171	XUTs	52	49	9	7	0.334991	0.699903
12R191	XUTs	0	0	0	0	NA	NA
12R197	XUTs	4	2	0	0	-0.949051	NA
12R207	XUTs	93	83	3	4	-1.63777	0.0589
12R212	XUTs	17	8	2	0	-0.662679	0.772532
12R215	XUTs	1	4	0	2	1.70639	0.506095
12R220	XUTs	0	1	0	0	1.38838	NA
12R229	XUTs	52	51	9	11	0.653037	0.383262
12R232	XUTs	5	1	1	1	1.55506	0.54378
12R235	XUTs	599	375	38	45	-0.487553	0.161811
12R237	XUTs	240	157	17	10	-0.859017	0.0918153
12R239	XUTs	18	5	0	4	0.732963	0.685171
12R244	XUTs	1	1	2	1	3.55913	0.124176
12R249	XUTs	92	85	5	2	-1.69025	0.0532282
12R250	XUTs	39	36	6	4	0.079755	0.945458
12R257	XUTs	10	5	0	0	-2.27092	NA
12R265	XUTs	50	43	6	1	-0.787718	0.481261
12R267	XUTs	7	8	0	0	-2.36624	NA
12R27	XUTs	27	10	4	1	0.146759	0.931493
12R287	XUTs	46	27	3	4	-0.312212	0.798709
12R297	XUTs	75	53	9	2	-0.5698	0.541972
12R299	XUTs	2693	2247	386	270	0.0843361	0.70878
12R3	XUTs	5	3	1	0	0.0118417	NA
12R304	XUTs	2	4	2	0	1.21856	0.663473
12R306	XUTs	26	22	1	0	-2.5926	0.219362
12R31	XUTs	1	1	0	0	0.556988	NA
12R313	XUTs	0	0	0	0	NA	NA
12R328	XUTs	24	15	5	5	1.08869	0.299878
12R33	XUTs	20	15	2	0	-1.18619	0.552618
12R336	XUTs	750	691	50	30	-1.19281	7.1856e-05
12R337	XUTs	7	10	0	0	-2.57196	0.386601
12R341	XUTs	9	8	0	0	-2.51757	0.401985
12R346	XUTs	24	12	0	0	-3.53395	0.129159
12R348	XUTs	8	7	2	1	0.655744	0.750248
12R352	XUTs	330	268	21	10	-1.28374	0.0033861
12R354	XUTs	2	0	0	0	0.801281	NA
12R361	XUTs	52	43	2	2	-1.55684	0.193254
12R370	XUTs	64	58	22	11	1.08466	0.0584929
12R385	XUTs	104	121	8	11	-0.567983	0.416319
12R387	XUTs	16	5	1	1	-0.27528	0.907137
12R389	XUTs	0	0	0	0	NA	NA
12R391	XUTs	5	1	0	0	-0.864404	NA
12R44	XUTs	56	50	4	2	-1.16373	0.273376
12R5	XUTs	28	25	0	0	-4.15855	0.0442056
12R50	XUTs	21	17	0	0	-3.66707	0.104487
12R7	XUTs	0	0	0	0	NA	NA
12R76	XUTs	107	75	11	9	-0.158568	0.835802
12R85	XUTs	0	0	0	0	NA	NA
12R96	XUTs	4	4	2	1	1.54987	0.453895
13F10	XUTs	8	2	0	0	-1.61859	NA
13F106	XUTs	25	20	1	0	-2.49368	0.244878
13F112	XUTs	34	31	0	0	-4.45546	0.0241515
13F116	XUTs	15	18	1	0	-2.09581	0.366008
13F12	XUTs	0	0	0	1	4.57481	NA
13F126	XUTs	0	0	0	0	NA	NA
13F129	XUTs	18	22	1	0	-2.37356	0.281135
13F137	XUTs	45	28	1	3	-1.1023	0.402852
13F14	XUTs	285	246	20	14	-0.969752	0.0290257
13F142	XUTs	13	8	0	0	-2.77963	0.320644
13F146	XUTs	29	10	1	0	-2.19931	0.336122
13F151	XUTs	53	38	5	6	-0.00302947	0.997535
13F153	XUTs	10	11	3	1	0.54079	0.764911
13F160	XUTs	32	19	1	0	-2.63921	0.20744
13F161	XUTs	148	115	9	9	-0.84499	0.178293
13F171	XUTs	22	13	1	0	-2.09967	0.362798
13F174	XUTs	9	7	8	2	2.26972	0.0474606
13F179	XUTs	4	0	0	0	-0.186803	NA
13F184	XUTs	9	3	0	0	-1.90728	NA
13F191	XUTs	13	8	0	1	-1.29956	0.618432
13F192	XUTs	5	1	1	1	1.55506	0.54378
13F195	XUTs	57	57	5	6	-0.366409	0.704079
13F199	XUTs	1	0	1	0	3.02033	NA
13F20	XUTs	19	9	1	0	-1.75669	0.476833
13F201	XUTs	4	7	1	0	-0.560065	0.861975
13F206	XUTs	33	22	4	2	-0.188013	0.892466
13F208	XUTs	2	2	0	0	-0.443804	NA
13F209	XUTs	110	90	42	31	1.55289	4.12634e-05
13F213	XUTs	23	7	0	1	-1.74824	0.470198
13F214	XUTs	52	49	3	3	-1.07264	0.318897
13F217	XUTs	26	11	5	2	0.636205	0.635043
13F218	XUTs	2	2	2	3	3.36968	0.0429484
13F221	XUTs	6	10	1	2	0.573963	0.776856
13F222	XUTs	29	21	9	4	1.04543	0.264513
13F229	XUTs	41	11	8	1	0.49844	0.705154
13F239	XUTs	28	46	0	0	-4.70952	0.0151272
13F247	XUTs	37	18	3	6	0.505577	0.660323
13F256	XUTs	8	7	2	2	1.11146	0.517871
13F259	XUTs	54	52	11	2	-0.105648	0.920493
13F261	XUTs	25	16	3	0	-0.822091	0.643663
13F272	XUTs	33	18	0	0	-4.04609	0.0547825
13F274	XUTs	2	10	0	0	-2.17737	NA
13F286	XUTs	28	33	11	3	0.787402	0.410994
13F294	XUTs	25	22	7	3	0.734926	0.500452
13F3	XUTs	210	202	12	5	-1.63529	0.00365864
13F30	XUTs	30	29	0	1	-2.86549	0.15053
13F315	XUTs	26	18	0	0	-3.86032	0.0759073
13F321	XUTs	58	80	0	0	-5.58969	0.00155221
13F333	XUTs	89	73	27	15	1.04031	0.037254
13F337	XUTs	12	19	1	0	-2.0367	0.386833
13F339	XUTs	102	91	11	4	-0.722488	0.332917
13F342	XUTs	8	9	0	0	-2.545	0.394072
13F349	XUTs	17	9	2	1	-0.0830404	0.965944
13F350	XUTs	54	81	22	12	0.930869	0.131341
13F354	XUTs	112	67	10	13	0.111452	0.882071
13F359	XUTs	37	19	1	5	-0.0780916	0.957512
13F364	XUTs	15	5	0	1	-1.16295	0.668888
13F370	XUTs	33	19	1	1	-1.64731	0.340309
13F373	XUTs	16	28	16	7	1.96352	0.00927239
13F375	XUTs	28	14	3	5	0.711882	0.55195
13F376	XUTs	330	254	78	54	0.862335	0.00271393
13F390	XUTs	25	16	3	1	-0.360899	0.827191
13F393	XUTs	62	42	24	9	1.32691	0.0232368
13F398	XUTs	61	50	10	12	0.700542	0.318496
13F43	XUTs	0	5	2	1	2.04597	0.381314
13F5	XUTs	6	6	1	0	-0.625384	0.843991
13F51	XUTs	46	43	15	5	0.791662	0.308125
13F52	XUTs	38	27	2	4	-0.369577	0.775802
13F54	XUTs	3	1	0	0	-0.32255	NA
13F59	XUTs	0	4	0	0	-0.663177	NA
13F63	XUTs	1	9	1	1	0.518729	0.846059
13F65	XUTs	139	103	6	3	-1.74643	0.0193893
13F80	XUTs	115	76	19	13	0.446439	0.449033
13F98	XUTs	4	3	0	0	-1.21756	NA
13R108	XUTs	1054	715	62	51	-0.936322	0.000274759
13R110	XUTs	6	9	1	1	0.0502047	0.982933
13R114	XUTs	96	97	6	6	-1.01398	0.180389
13R117	XUTs	84	70	23	14	0.934744	0.0782893
13R124	XUTs	5	1	0	0	-0.864404	NA
13R127	XUTs	10	27	1	2	-0.695568	0.697566
13R132	XUTs	34	29	8	16	1.67917	0.0143123
13R134	XUTs	6	1	0	0	-1.07415	NA
13R14	XUTs	47	54	1	1	-2.68755	0.0636063
13R147	XUTs	0	0	0	0	NA	NA
13R153	XUTs	276	205	6	5	-2.43284	4.83716e-05
13R177	XUTs	1	3	2	4	3.59154	0.0216503
13R182	XUTs	1	1	0	0	0.556988	NA
13R183	XUTs	1	2	1	0	1.30401	NA
13R188	XUTs	0	0	0	0	NA	NA
13R196	XUTs	100	62	3	1	-2.32329	0.0272552
13R199	XUTs	4	2	0	1	0.558267	NA
13R2	XUTs	31	43	15	11	1.44449	0.0301653
13R20	XUTs	73	66	15	6	0.233968	0.767838
13R201	XUTs	8	6	0	0	-2.21756	NA
13R216	XUTs	37	21	5	1	-0.283458	0.840653
13R217	XUTs	51	46	4	1	-1.32093	0.25086
13R228	XUTs	24	38	12	8	1.30103	0.0926346
13R232	XUTs	23	21	1	7	0.647675	0.60104
13R234	XUTs	96	79	3	3	-1.85375	0.0400028
13R236	XUTs	15	8	1	0	-1.48775	0.567471
13R242	XUTs	3	0	0	0	0.224321	NA
13R245	XUTs	16	9	2	0	-0.680635	0.765308
13R253	XUTs	16	8	0	0	-2.94899	0.270633
13R255	XUTs	9	5	0	1	-0.693017	0.815024
13R27	XUTs	1	0	0	0	1.64432	NA
13R272	XUTs	0	0	0	0	NA	NA
13R275	XUTs	2	5	0	1	0.171595	0.960325
13R276	XUTs	5	6	0	1	-0.424087	0.89196
13R279	XUTs	129	91	5	7	-1.14899	0.110333
13R293	XUTs	83	70	23	12	0.853199	0.124176
13R294	XUTs	13	6	0	3	0.536762	0.792161
13R297	XUTs	30	15	0	2	-1.34688	0.458244
13R303	XUTs	34	30	3	3	-0.404023	0.75442
13R307	XUTs	7	10	2	0	-0.236422	0.928152
13R313	XUTs	20	16	2	0	-1.23313	0.533193
13R316	XUTs	75	79	4	6	-0.937445	0.272379
13R330	XUTs	98	72	5	10	-0.435425	0.58429
13R340	XUTs	26	17	2	1	-0.827935	0.61982
13R341	XUTs	51	41	0	0	-4.94189	0.0078811
13R356	XUTs	0	0	0	0	NA	NA
13R357	XUTs	4	4	0	0	-1.44386	NA
13R362	XUTs	125	103	7	4	-1.37997	0.0560403
13R378	XUTs	7	12	0	0	-2.75204	0.3326
13R385	XUTs	7	16	0	0	-3.05635	0.24751
13R388	XUTs	24	12	2	0	-1.18278	0.556
13R389	XUTs	28	11	7	9	1.82651	0.0297379
13R400	XUTs	10	9	0	1	-1.1959	0.654171
13R402	XUTs	14	30	4	6	0.817833	0.469395
13R411	XUTs	106	50	4	4	-1.20794	0.178416
13R422	XUTs	3	0	0	0	0.224321	NA
13R47	XUTs	14	22	5	0	-0.02068	0.989839
13R52	XUTs	1	2	0	0	-0.104231	NA
13R69	XUTs	1	0	0	0	1.64432	NA
13R73	XUTs	20	29	5	1	-0.146314	0.92396
13R87	XUTs	272	168	22	12	-0.672746	0.164546
13R88	XUTs	44	46	0	0	-4.94098	0.00807822
13R97	XUTs	36	31	4	5	0.132161	0.911217
14F101	XUTs	41	24	0	3	-1.30539	0.379191
14F102	XUTs	132	103	48	32	1.4499	6.03864e-05
14F115	XUTs	1	1	0	0	0.556988	NA
14F116	XUTs	4	6	0	0	-1.8117	NA
14F118	XUTs	76	48	11	8	0.325931	0.679582
14F123	XUTs	74	47	6	6	-0.285982	0.760128
14F126	XUTs	1	0	0	0	1.64432	NA
14F133	XUTs	19	33	2	2	-0.763882	0.605743
14F142	XUTs	388	303	30	16	-0.915357	0.0188717
14F166	XUTs	35	13	0	1	-2.45587	0.25005
14F171	XUTs	355	250	6	4	-2.90058	1.07104e-06
14F190	XUTs	0	0	0	0	NA	NA
14F20	XUTs	12	12	0	0	-3.02885	0.247464
14F208	XUTs	15	24	0	3	-0.657872	0.710088
14F214	XUTs	24	15	1	0	-2.26078	0.312143
14F219	XUTs	4	0	0	0	-0.186803	NA
14F231	XUTs	332	278	23	11	-1.18331	0.00590612
14F234	XUTs	14	3	0	0	-2.37167	NA
14F236	XUTs	127	87	11	5	-0.738703	0.293336
14F238	XUTs	0	0	0	0	NA	NA
14F240	XUTs	0	0	0	0	NA	NA
14F255	XUTs	29	21	4	5	0.575141	0.607538
14F257	XUTs	53	40	2	1	-1.95235	0.135196
14F259	XUTs	111	129	13	11	-0.349308	0.601676
14F269	XUTs	1	0	0	0	1.64432	NA
14F280	XUTs	0	1	0	0	1.38838	NA
14F289	XUTs	152	121	20	17	0.13298	0.82179
14F290	XUTs	25	33	2	0	-1.96413	0.249582
14F292	XUTs	0	0	0	0	NA	NA
14F293	XUTs	83	50	17	9	0.663323	0.310821
14F296	XUTs	2	0	0	0	0.801281	NA
14F302	XUTs	53	42	3	2	-1.24413	0.275559
14F303	XUTs	102	79	15	16	0.488158	0.413119
14F306	XUTs	20	20	4	1	-0.0663325	0.965944
14F310	XUTs	2	0	0	0	0.801281	NA
14F313	XUTs	61	39	6	5	-0.146394	0.886647
14F319	XUTs	6	2	0	0	-1.32238	NA
14F324	XUTs	17	14	1	0	-1.96331	0.406006
14F37	XUTs	13	5	0	0	-2.50626	0.408182
14F39	XUTs	8	4	6	2	2.41478	0.0593338
14F52	XUTs	4	5	0	0	-1.63946	NA
14F55	XUTs	111	68	7	5	-0.863703	0.268464
14F59	XUTs	18	8	1	4	0.779709	0.61179
14F6	XUTs	23	25	23	10	2.40624	8.41916e-05
14F61	XUTs	29	20	6	9	1.36161	0.106391
14F67	XUTs	2	0	0	0	0.801281	NA
14F97	XUTs	72	79	11	11	0.212131	0.782582
14F99	XUTs	0	1	0	0	1.38838	NA
14R1	XUTs	11	11	0	0	-2.90332	0.283369
14R106	XUTs	18	25	1	0	-2.49154	0.249123
14R108	XUTs	1	1	0	0	0.556988	NA
14R111	XUTs	0	0	0	0	NA	NA
14R114	XUTs	18	3	0	1	-1.17639	0.670518
14R128	XUTs	5	7	2	2	1.38981	0.424992
14R130	XUTs	309	317	14	15	-1.43758	0.00144937
14R132	XUTs	3	9	0	0	-2.14134	NA
14R136	XUTs	1	4	0	1	0.635336	NA
14R141	XUTs	13	8	0	0	-2.77963	0.320644
14R153	XUTs	1	5	0	0	-1.17678	NA
14R157	XUTs	2	1	0	0	0.0508508	NA
14R162	XUTs	22	10	6	6	1.66655	0.0834064
14R179	XUTs	12	15	0	0	-3.22449	0.19764
14R181	XUTs	3	2	0	2	1.85196	0.459581
14R184	XUTs	1	2	1	0	1.30401	NA
14R185	XUTs	6	3	0	0	-1.53398	NA
14R187	XUTs	45	49	6	4	-0.26467	0.802938
14R192	XUTs	6	5	1	1	0.561418	0.821204
14R194	XUTs	80	22	0	0	-4.97635	0.00839322
14R195	XUTs	35	27	7	3	0.350461	0.75442
14R201	XUTs	0	0	0	0	NA	NA
14R204	XUTs	111	69	4	1	-2.16118	0.0248428
14R205	XUTs	5	11	0	0	-2.52903	0.40411
14R21	XUTs	59	50	7	2	-0.637761	0.525305
14R210	XUTs	5	10	0	2	0.131249	0.958492
14R217	XUTs	9	7	3	1	0.967996	0.58599
14R219	XUTs	77	53	23	26	1.64639	0.000381783
14R220	XUTs	3	4	0	0	-1.2841	NA
14R223	XUTs	18	15	1	1	-1.03019	0.597765
14R229	XUTs	4	5	2	0	0.683022	0.802938
14R232	XUTs	37	25	4	3	-0.120239	0.928425
14R245	XUTs	2	3	0	0	-0.811569	NA
14R249	XUTs	33	15	4	2	0.0468342	0.973588
14R250	XUTs	47	36	2	2	-1.35249	0.279635
14R264	XUTs	5	4	0	0	-1.58768	NA
14R269	XUTs	119	89	13	6	-0.460404	0.512599
14R271	XUTs	25	14	2	1	-0.671039	0.702653
14R284	XUTs	37	43	5	5	-0.0167231	0.987174
14R286	XUTs	32	23	0	3	-1.08149	0.486888
14R291	XUTs	89	73	0	0	-5.76056	0.000859761
14R293	XUTs	0	0	0	0	NA	NA
14R300	XUTs	1	1	0	0	0.556988	NA
14R308	XUTs	37	14	0	0	-4.00703	0.0606094
14R319	XUTs	4	2	2	0	1.35247	0.625874
14R327	XUTs	60	27	8	12	0.991962	0.185489
14R330	XUTs	51	38	12	4	0.496476	0.570095
14R332	XUTs	2	0	0	0	0.801281	NA
14R340	XUTs	0	3	0	0	-0.247808	NA
14R344	XUTs	58	43	8	8	0.375217	0.659224
14R347	XUTs	0	0	0	0	NA	NA
14R348	XUTs	0	0	0	0	NA	NA
14R349	XUTs	0	0	0	0	NA	NA
14R36	XUTs	14	7	0	1	-1.27646	0.626429
14R40	XUTs	116	74	9	5	-0.743047	0.321114
14R44	XUTs	16	17	3	3	0.536308	0.705154
14R46	XUTs	214	142	57	40	1.14875	0.000448916
14R72	XUTs	0	0	0	0	NA	NA
14R74	XUTs	28	21	2	0	-1.66089	0.356826
14R75	XUTs	233	199	25	17	-0.367347	0.448934
14R89	XUTs	4	4	1	0	-0.0432178	NA
14R9	XUTs	0	0	0	0	NA	NA
14R90	XUTs	13	6	0	0	-2.60327	0.377364
15F1	XUTs	6	12	0	0	-2.68973	0.354267
15F10	XUTs	82	65	13	13	0.52803	0.415659
15F102	XUTs	26	36	4	6	0.358825	0.750248
15F104	XUTs	23	8	0	0	-3.28051	0.186082
15F107	XUTs	10	9	2	0	-0.343492	0.888892
15F112	XUTs	44	32	4	5	-0.032434	0.977183
15F116	XUTs	0	0	0	0	NA	NA
15F129	XUTs	17	10	0	2	-0.60883	0.776611
15F14	XUTs	2281	1172	365	247	0.55508	0.00849097
15F141	XUTs	9	6	2	0	0.0235563	0.992568
15F144	XUTs	78	45	8	10	0.300661	0.713537
15F148	XUTs	0	2	0	0	0.342501	NA
15F156	XUTs	84	72	17	12	0.570582	0.355046
15F157	XUTs	6	4	0	0	-1.71844	NA
15F161	XUTs	2	4	0	0	-1.10446	NA
15F163	XUTs	41	32	0	1	-3.15149	0.0992554
15F18	XUTs	288	217	12	10	-1.50278	0.00201147
15F180	XUTs	0	0	0	0	NA	NA
15F197	XUTs	109	54	6	10	-0.244937	0.771678
15F200	XUTs	233	182	33	23	0.117133	0.811172
15F203	XUTs	14	18	0	0	-3.4728	0.142152
15F206	XUTs	0	0	0	0	NA	NA
15F21	XUTs	99	102	14	9	-0.155991	0.832535
15F217	XUTs	16	16	10	7	2.07419	0.0107063
15F232	XUTs	150	104	22	15	0.239425	0.675999
15F238	XUTs	49	28	2	3	-0.870478	0.482353
15F245	XUTs	15	9	1	0	-1.56139	0.542127
15F249	XUTs	8	10	0	1	-1.15316	0.670518
15F26	XUTs	0	0	0	0	NA	NA
15F263	XUTs	3	0	0	0	0.224321	NA
15F265	XUTs	1	2	0	0	-0.104231	NA
15F269	XUTs	37	17	5	4	0.484603	0.675564
15F27	XUTs	1	1	0	0	0.556988	NA
15F281	XUTs	0	0	0	0	NA	NA
15F286	XUTs	7	7	4	2	1.74231	0.223836
15F288	XUTs	21	17	0	3	-0.546827	0.7589
15F296	XUTs	43	41	2	1	-1.8329	0.172986
15F307	XUTs	248	167	24	9	-0.658898	0.193254
15F309	XUTs	20	2	0	0	-2.69733	0.366718
15F312	XUTs	2	2	0	0	-0.443804	NA
15F318	XUTs	0	0	0	0	NA	NA
15F33	XUTs	12	19	0	0	-3.44997	0.148912
15F331	XUTs	82	51	8	4	-0.453771	0.610305
15F345	XUTs	139	99	3	5	-1.84915	0.0167041
15F381	XUTs	12	8	0	0	-2.71844	0.339088
15F388	XUTs	66	65	14	21	1.13143	0.0453392
15F39	XUTs	10	4	0	0	-2.1477	NA
15F42	XUTs	12	33	2	0	-1.68304	0.371205
15F428	XUTs	0	0	0	0	NA	NA
15F431	XUTs	1	0	0	0	1.64432	NA
15F435	XUTs	4	0	0	0	-0.186803	NA
15F436	XUTs	95	83	2	7	-1.24925	0.135361
15F444	XUTs	88	78	9	2	-0.966644	0.247125
15F448	XUTs	30	23	3	5	0.329588	0.787933
15F45	XUTs	22	19	2	0	-1.42528	0.451468
15F453	XUTs	43	42	1	2	-1.81041	0.173635
15F458	XUTs	23	4	0	0	-3.02383	0.261999
15F473	XUTs	2	3	0	1	0.713083	NA
15F479	XUTs	26	19	11	5	1.49615	0.0735842
15F5	XUTs	2	0	0	0	0.801281	NA
15F6	XUTs	40	45	4	10	0.441201	0.64109
15F89	XUTs	13	11	19	5	2.93944	0.000124342
15F9	XUTs	25	29	2	5	0.0840687	0.950949
15F94	XUTs	24	22	8	6	1.28034	0.146026
15R10	XUTs	5	9	1	0	-0.909484	0.761282
15R101	XUTs	89	69	7	1	-1.3439	0.135677
15R116	XUTs	63	56	2	8	-0.499024	0.610927
15R12	XUTs	2	4	0	0	-1.10446	NA
15R137	XUTs	3	2	2	1	2.26465	0.286456
15R148	XUTs	21	17	3	1	-0.277574	0.869594
15R149	XUTs	125	84	10	7	-0.595979	0.394657
15R150	XUTs	66	66	12	5	-0.00443589	0.995837
15R157	XUTs	0	0	0	0	NA	NA
15R162	XUTs	1	1	2	1	3.55913	0.124176
15R169	XUTs	313	216	24	17	-0.668035	0.122534
15R172	XUTs	14	18	0	3	-0.342772	0.857505
15R175	XUTs	85	43	0	3	-2.29335	0.0606687
15R177	XUTs	19	5	1	0	-1.48149	0.574602
15R178	XUTs	39	28	2	0	-2.09772	0.200895
15R185	XUTs	32	17	2	0	-1.62363	0.372788
15R187	XUTs	1	0	7	3	6.30763	0.000752332
15R189	XUTs	8	10	2	0	-0.303086	0.903584
15R19	XUTs	45	71	18	13	1.03174	0.105365
15R194	XUTs	96	78	2	2	-2.43143	0.0173891
15R211	XUTs	44	17	2	1	-1.27527	0.404594
15R218	XUTs	4	5	1	1	0.811007	0.745803
15R219	XUTs	15	13	7	2	1.30927	0.264513
15R220	XUTs	4	9	0	1	-0.732481	0.805832
15R225	XUTs	0	0	0	0	NA	NA
15R229	XUTs	2	7	2	1	1.27062	0.551174
15R235	XUTs	42	17	1	0	-2.80735	0.171002
15R243	XUTs	1	0	0	0	1.64432	NA
15R247	XUTs	4	1	1	0	0.763029	NA
15R249	XUTs	118	69	5	4	-1.33215	0.0998647
15R264	XUTs	16	33	0	0	-4.13801	0.0502461
15R265	XUTs	48	63	4	2	-1.27434	0.230029
15R284	XUTs	2	3	0	0	-0.811569	NA
15R289	XUTs	3	1	0	0	-0.32255	NA
15R29	XUTs	169	89	5	6	-1.47959	0.0367367
15R293	XUTs	23	6	0	1	-1.68438	0.494187
15R294	XUTs	2	1	0	0	0.0508508	NA
15R314	XUTs	266	218	11	11	-1.44357	0.00351999
15R327	XUTs	3	5	0	0	-1.50099	NA
15R33	XUTs	308	247	6	5	-2.64855	5.77432e-06
15R34	XUTs	42	44	4	1	-1.16643	0.3326
15R341	XUTs	0	1	0	0	1.38838	NA
15R344	XUTs	51	28	3	3	-0.656686	0.58149
15R346	XUTs	18	4	0	0	-2.74637	0.339518
15R355	XUTs	14	25	1	0	-2.37861	0.284433
15R366	XUTs	58	58	5	5	-0.539214	0.56934
15R372	XUTs	38	37	1	1	-2.23751	0.148743
15R380	XUTs	5	1	0	1	0.636383	NA
15R385	XUTs	18	19	3	2	0.0848731	0.958492
15R399	XUTs	7	12	0	0	-2.75204	0.3326
15R4	XUTs	26	20	13	17	2.43847	7.21793e-05
15R403	XUTs	9	2	0	0	-1.74659	NA
15R427	XUTs	346	288	83	71	0.973255	0.000418066
15R430	XUTs	3	3	2	2	2.42829	0.173886
15R432	XUTs	180	153	8	13	-0.949837	0.0990229
15R433	XUTs	28	18	5	3	0.495884	0.685504
15R440	XUTs	3	0	0	0	0.224321	NA
15R442	XUTs	114	63	13	10	0.105667	0.888258
15R451	XUTs	1	0	0	0	1.64432	NA
15R461	XUTs	2	9	0	0	-2.04525	NA
15R466	XUTs	42	21	0	0	-4.34129	0.0309881
15R47	XUTs	33	23	3	3	-0.184714	0.892653
15R471	XUTs	1	1	0	0	0.556988	NA
15R475	XUTs	1	0	0	0	1.64432	NA
15R477	XUTs	23	11	0	3	-0.322531	0.864984
15R485	XUTs	53	43	2	4	-0.953431	0.386218
15R486	XUTs	31	35	0	0	-4.50242	0.0222197
15R489	XUTs	0	0	0	0	NA	NA
15R490	XUTs	2	0	0	0	0.801281	NA
15R491	XUTs	0	0	0	0	NA	NA
15R51	XUTs	26	17	2	1	-0.827935	0.61982
15R54	XUTs	9	6	1	0	-0.900158	0.762078
15R55	XUTs	1	0	0	0	1.64432	NA
15R56	XUTs	9	4	0	0	-2.05177	NA
15R65	XUTs	1	1	0	0	0.556988	NA
15R66	XUTs	89	66	10	12	0.22722	0.760585
15R7	XUTs	31	22	1	3	-0.648306	0.660833
15R8	XUTs	424	395	30	31	-0.738346	0.0462085
15R84	XUTs	20	21	3	2	-0.0628888	0.96669
15R92	XUTs	0	0	0	0	NA	NA
15R99	XUTs	22	14	1	0	-2.1482	0.347398
16F1	XUTs	0	1	0	0	1.38838	NA
16F100	XUTs	1	0	0	0	1.64432	NA
16F113	XUTs	8	2	1	0	-0.22661	NA
16F117	XUTs	16	20	3	0	-0.713499	0.701012
16F13	XUTs	3	4	0	0	-1.2841	NA
16F134	XUTs	1	1	0	0	0.556988	NA
16F137	XUTs	4	1	1	0	0.763029	NA
16F139	XUTs	1	1	1	0	1.95504	NA
16F141	XUTs	0	0	0	0	NA	NA
16F145	XUTs	163	124	26	22	0.441746	0.358159
16F148	XUTs	44	36	6	2	-0.353303	0.761681
16F151	XUTs	34	24	5	8	0.911198	0.321109
16F155	XUTs	79	66	0	0	-5.60277	0.00135208
16F17	XUTs	12	26	2	5	0.538645	0.695
16F175	XUTs	13	4	4	1	1.27056	0.439283
16F176	XUTs	3	3	0	1	0.486159	NA
16F178	XUTs	12	13	4	2	0.896025	0.528599
16F180	XUTs	93	64	20	14	0.813628	0.139556
16F182	XUTs	122	95	12	6	-0.599792	0.383522
16F183	XUTs	8	7	0	0	-2.33515	NA
16F184	XUTs	12	5	0	0	-2.43201	NA
16F19	XUTs	4	3	0	1	0.29073	0.933124
16F193	XUTs	0	0	0	0	NA	NA
16F197	XUTs	73	41	0	1	-3.76262	0.0351094
16F206	XUTs	0	0	0	0	NA	NA
16F208	XUTs	1	0	0	1	3.17243	NA
16F213	XUTs	224	153	20	14	-0.448921	0.383262
16F224	XUTs	1	3	2	1	2.47134	0.259158
16F226	XUTs	51	35	25	9	1.63917	0.00497692
16F227	XUTs	7	7	0	0	-2.25124	NA
16F229	XUTs	28	21	2	1	-1.03079	0.517483
16F233	XUTs	3	2	0	0	-0.718458	NA
16F236	XUTs	6	3	0	0	-1.53398	NA
16F238	XUTs	178	172	53	43	1.12872	0.00104974
16F24	XUTs	9	7	0	1	-0.926734	0.743096
16F243	XUTs	32	23	0	3	-1.08149	0.486888
16F247	XUTs	320	222	79	61	1.07395	0.000113328
16F27	XUTs	375	346	0	1	-6.49274	2.49278e-05
16F272	XUTs	0	0	1	1	5.46575	0.0724013
16F274	XUTs	8	15	0	0	-3.03696	0.25005
16F28	XUTs	94	74	5	3	-1.3916	0.103092
16F280	XUTs	25	20	6	5	0.983644	0.326305
16F292	XUTs	14	16	2	3	0.425054	0.785002
16F30	XUTs	170	149	34	23	0.507841	0.253306
16F31	XUTs	19	18	2	2	-0.205442	0.902616
16F310	XUTs	34	21	1	1	-1.73633	0.305461
16F311	XUTs	0	0	0	0	NA	NA
16F324	XUTs	108	97	13	7	-0.379236	0.591093
16F332	XUTs	15	7	0	0	-2.81596	0.310435
16F334	XUTs	7	4	0	0	-1.83833	NA
16F339	XUTs	2	1	0	1	1.56668	NA
16F348	XUTs	10	6	6	5	2.50239	0.0157944
16F35	XUTs	78	70	11	12	0.332521	0.642797
16F353	XUTs	43	21	0	0	-4.36144	0.0297958
16F356	XUTs	6	3	0	0	-1.53398	NA
16F36	XUTs	0	0	0	0	NA	NA
16F363	XUTs	5	5	0	1	-0.264098	0.936008
16F376	XUTs	207	170	40	23	0.408147	0.346145
16F377	XUTs	26	35	1	10	0.612398	0.585739
16F383	XUTs	40	22	7	1	0.0230029	0.985333
16F384	XUTs	13	6	1	0	-1.19933	0.667244
16F47	XUTs	67	39	10	15	1.00332	0.12645
16F65	XUTs	45	39	15	6	0.963507	0.19062
16F73	XUTs	0	0	0	0	NA	NA
16F81	XUTs	9	5	2	6	2.32428	0.0570035
16F86	XUTs	10	3	0	0	-2.01292	NA
16F88	XUTs	42	23	4	4	0.041834	0.97227
16F95	XUTs	27	25	4	5	0.492367	0.665973
16F98	XUTs	22	12	3	2	0.276971	0.861672
16R132	XUTs	0	0	0	0	NA	NA
16R143	XUTs	8	12	1	1	-0.367801	0.873166
16R144	XUTs	0	1	0	0	1.38838	NA
16R15	XUTs	30	10	3	6	1.00345	0.383262
16R165	XUTs	9	4	1	1	0.383664	0.87737
16R166	XUTs	98	50	8	7	-0.237608	0.78313
16R174	XUTs	19	6	1	2	0.0934966	0.96306
16R179	XUTs	1	1	0	0	0.556988	NA
16R18	XUTs	0	0	0	0	NA	NA
16R184	XUTs	48	54	8	16	0.95122	0.176884
16R190	XUTs	37	39	0	0	-4.69799	0.0143887
16R192	XUTs	34	30	3	4	-0.16584	0.897174
16R201	XUTs	16	0	1	2	0.871891	0.705388
16R204	XUTs	39	16	1	2	-1.07793	0.490512
16R21	XUTs	0	0	0	0	NA	NA
16R218	XUTs	31	16	0	0	-3.92211	0.0688194
16R225	XUTs	30	48	6	7	0.377351	0.708203
16R235	XUTs	14	8	4	1	0.848613	0.596975
16R239	XUTs	31	19	2	0	-1.6672	0.354733
16R25	XUTs	30	17	4	1	-0.23541	0.878604
16R262	XUTs	10	8	1	0	-1.18158	0.672142
16R270	XUTs	19	19	9	8	1.84112	0.0214165
16R274	XUTs	9	3	0	0	-1.90728	NA
16R276	XUTs	0	1	0	0	1.38838	NA
16R278	XUTs	53	36	3	3	-0.852602	0.449997
16R283	XUTs	46	31	3	3	-0.642026	0.590101
16R288	XUTs	35	26	2	1	-1.34451	0.366099
16R29	XUTs	17	9	0	0	-3.07077	0.236461
16R295	XUTs	10	5	1	1	0.165636	0.94718
16R299	XUTs	6	0	1	1	1.63384	0.549848
16R30	XUTs	16	8	1	1	-0.513425	0.816633
16R307	XUTs	16	4	4	1	1.05431	0.525061
16R310	XUTs	5	8	0	0	-2.1972	NA
16R314	XUTs	32	34	4	3	-0.26017	0.837565
16R343	XUTs	22	26	1	3	-0.55939	0.714802
16R346	XUTs	31	34	6	1	-0.305168	0.815782
16R348	XUTs	427	438	78	65	0.391436	0.232713
16R349	XUTs	53	30	0	1	-3.30147	0.0787501
16R351	XUTs	41	17	0	1	-2.74399	0.17794
16R354	XUTs	13	10	3	6	1.72361	0.122215
16R359	XUTs	27	24	3	1	-0.709566	0.636103
16R363	XUTs	13	18	3	1	-0.0441935	0.979616
16R364	XUTs	8	10	5	4	1.97533	0.0834039
16R366	XUTs	18	8	1	0	-1.64413	0.515383
16R375	XUTs	132	119	14	11	-0.330622	0.603121
16R376	XUTs	49	35	2	1	-1.79983	0.181649
16R399	XUTs	45	54	5	3	-0.677457	0.517646
16R402	XUTs	2	1	0	1	1.56668	NA
16R404	XUTs	35	27	10	7	1.14252	0.148753
16R410	XUTs	36	19	0	0	-4.15135	0.0451612
16R419	XUTs	113	116	13	14	-0.0829331	0.906041
16R422	XUTs	87	83	6	10	-0.379321	0.633195
16R425	XUTs	0	0	0	0	NA	NA
16R54	XUTs	47	44	14	3	0.504725	0.56934
16R59	XUTs	7	3	0	0	-1.66945	NA
16R6	XUTs	28	22	1	3	-0.574419	0.704384
16R66	XUTs	0	0	1	0	4.40079	NA
16R67	XUTs	12	10	1	4	0.958361	0.5294
16R69	XUTs	73	64	10	9	0.158719	0.846565
16R8	XUTs	50	37	8	2	-0.154909	0.890609
16R82	XUTs	20	9	4	2	0.770551	0.588749
16R9	XUTs	16	10	0	0	-3.08952	0.230955
16R94	XUTs	7	5	0	1	-0.494575	0.872638
16R98	XUTs	1	2	1	0	1.30401	NA
1F1	XUTs	0	1	0	0	1.38838	NA
1F11	XUTs	11	4	0	0	-2.23763	NA
1F12	XUTs	30	31	3	1	-0.983159	0.48357
1F14	XUTs	92	64	18	11	0.58431	0.341647
1F15	XUTs	31	26	3	3	-0.230593	0.865172
1F23	XUTs	4	5	1	0	-0.236602	NA
1F25	XUTs	81	38	4	5	-0.634543	0.516858
1F3	XUTs	0	0	0	0	NA	NA
1F32	XUTs	21	15	3	2	0.166533	0.917452
1F4	XUTs	132	85	22	13	0.385882	0.501106
1F60	XUTs	53	61	14	16	1.0742	0.0778495
1F72	XUTs	92	52	19	17	1.0565	0.0480692
1F75	XUTs	8	12	2	0	-0.472206	0.846159
1F89	XUTs	72	59	17	11	0.771707	0.210558
1F90	XUTs	154	122	40	25	0.912338	0.0222812
1F93	XUTs	13	10	7	3	1.77801	0.102276
1R101	XUTs	0	0	0	0	NA	NA
1R103	XUTs	60	40	0	0	-5.04037	0.00612762
1R107	XUTs	6	2	0	0	-1.32238	NA
1R108	XUTs	37	20	5	1	-0.253686	0.859092
1R16	XUTs	13	23	3	1	-0.285224	0.869353
1R18	XUTs	87	64	5	8	-0.483422	0.5631
1R2	XUTs	0	0	0	0	NA	NA
1R20	XUTs	2	0	0	0	0.801281	NA
1R35	XUTs	4	3	3	1	2.16078	0.239955
1R39	XUTs	1	4	0	0	-0.899386	NA
1R40	XUTs	46	23	1	3	-0.994966	0.463513
1R5	XUTs	5	7	0	0	-2.0672	NA
1R55	XUTs	35	26	2	4	-0.281914	0.832754
1R79	XUTs	9	19	1	1	-0.890413	0.668831
1R80	XUTs	3	1	0	0	-0.32255	NA
1R83	XUTs	38	35	3	1	-1.22722	0.353676
1R85	XUTs	7	7	0	2	0.302023	0.902213
1R87	XUTs	40	34	2	3	-0.857163	0.490188
1R90	XUTs	46	47	2	0	-2.60246	0.0831035
1R91	XUTs	195	131	8	3	-1.88356	0.00431939
1R99	XUTs	5	9	0	0	-2.31647	NA
2F101	XUTs	40	21	0	2	-1.80359	0.276937
2F106	XUTs	64	48	3	1	-1.81638	0.115489
2F116	XUTs	61	40	0	1	-3.60431	0.0467863
2F118	XUTs	31	26	2	3	-0.475791	0.72997
2F123	XUTs	0	0	0	0	NA	NA
2F125	XUTs	14	21	12	5	1.87064	0.028794
2F127	XUTs	1	1	0	0	0.556988	NA
2F132	XUTs	30	25	0	1	-2.74568	0.174959
2F134	XUTs	23	11	0	0	-3.44664	0.147128
2F136	XUTs	43	36	3	2	-0.984379	0.417363
2F141	XUTs	36	31	3	2	-0.749896	0.560838
2F143	XUTs	4	4	0	1	0.0637948	0.98385
2F145	XUTs	213	216	46	32	0.517757	0.1943
2F146	XUTs	74	71	22	9	0.726891	0.23871
2F149	XUTs	270	251	10	9	-1.78122	0.000469244
2F150	XUTs	157	108	11	6	-0.951573	0.133163
2F154	XUTs	51	60	3	4	-0.998075	0.328535
2F158	XUTs	14	6	0	0	-2.66941	0.357034
2F161	XUTs	11	4	0	0	-2.23763	NA
2F166	XUTs	18	15	0	1	-1.99771	0.383262
2F169	XUTs	0	0	0	0	NA	NA
2F170	XUTs	0	0	0	0	NA	NA
2F177	XUTs	151	123	25	22	0.473389	0.329949
2F190	XUTs	73	55	6	5	-0.521056	0.561927
2F197	XUTs	57	40	2	4	-0.952167	0.386356
2F2	XUTs	8	1	0	0	-1.41957	NA
2F206	XUTs	28	33	11	2	0.662462	0.518984
2F221	XUTs	35	29	1	0	-3.00245	0.128682
2F225	XUTs	30	25	1	0	-2.78589	0.172825
2F240	XUTs	6	2	0	0	-1.32238	NA
2F242	XUTs	246	174	26	22	-0.10048	0.846565
2F252	XUTs	14	13	0	0	-3.19012	0.204958
2F258	XUTs	11	2	0	0	-1.97279	NA
2F270	XUTs	10	5	4	1	1.40898	0.385101
2F274	XUTs	16	4	0	0	-2.61841	0.378279
2F282	XUTs	499	485	28	17	-1.47671	5.71738e-05
2F291	XUTs	0	0	0	0	NA	NA
2F313	XUTs	13	5	0	0	-2.50626	0.408182
2F319	XUTs	5	3	0	0	-1.38443	NA
2F32	XUTs	2	2	1	1	2.01043	0.431527
2F340	XUTs	75	66	24	16	1.17472	0.0208376
2F43	XUTs	4	8	3	1	1.29053	0.481138
2F50	XUTs	30	29	6	4	0.421356	0.702397
2F78	XUTs	42	18	6	0	-0.346987	0.814482
2F87	XUTs	46	39	5	2	-0.628086	0.578238
2F89	XUTs	165	119	1	0	-5.12677	0.00152667
2F91	XUTs	6	20	1	4	0.589314	0.72136
2F93	XUTs	7	12	0	1	-1.26583	0.633304
2R103	XUTs	37	36	0	0	-4.63054	0.0166558
2R109	XUTs	13	9	3	1	0.522745	0.771231
2R11	XUTs	5	8	2	2	1.26078	0.469892
2R114	XUTs	33	21	13	7	1.57829	0.0320631
2R121	XUTs	11	8	1	3	0.847168	0.618607
2R127	XUTs	140	115	25	20	0.507531	0.303601
2R136	XUTs	12	16	9	4	1.82199	0.0589
2R142	XUTs	0	0	0	0	NA	NA
2R154	XUTs	33	25	4	2	-0.278232	0.838616
2R166	XUTs	2	0	0	0	0.801281	NA
2R170	XUTs	43	21	3	3	-0.339762	0.797514
2R172	XUTs	22	31	1	0	-2.79298	0.174882
2R178	XUTs	42	22	0	1	-2.91349	0.140778
2R183	XUTs	8	10	1	0	-1.23164	0.656143
2R200	XUTs	9	13	0	0	-2.94517	0.273166
2R226	XUTs	165	129	40	20	0.693019	0.106744
2R246	XUTs	4	3	0	0	-1.21756	NA
2R256	XUTs	252	176	77	54	1.31111	5.00282e-06
2R264	XUTs	38	13	3	1	-0.611069	0.699214
2R267	XUTs	12	12	4	1	0.666321	0.680667
2R271	XUTs	12	17	0	1	-1.86777	0.429092
2R272	XUTs	12	16	1	0	-1.87211	0.438762
2R288	XUTs	22	19	3	0	-0.855156	0.62651
2R296	XUTs	0	0	0	0	NA	NA
2R299	XUTs	13	6	2	2	0.832927	0.629623
2R307	XUTs	41	23	8	2	0.313078	0.787472
2R31	XUTs	16	25	1	2	-0.795634	0.63696
2R314	XUTs	1	3	0	0	-0.555815	NA
2R318	XUTs	1	3	0	0	-0.555815	NA
2R334	XUTs	4	4	2	1	1.54987	0.453895
2R342	XUTs	161	143	38	31	0.864327	0.0275838
2R343	XUTs	187	160	14	14	-0.616684	0.25358
2R344	XUTs	11	3	2	1	0.862919	0.680068
2R349	XUTs	9	2	0	1	-0.252873	0.940113
2R39	XUTs	9	5	1	0	-0.781662	0.798117
2R43	XUTs	15	6	6	3	1.82385	0.116184
2R48	XUTs	266	224	23	25	-0.328036	0.482345
2R56	XUTs	20	13	1	3	0.0541812	0.974046
2R58	XUTs	0	0	0	0	NA	NA
2R61	XUTs	0	0	0	0	NA	NA
2R63	XUTs	206	161	9	14	-0.951339	0.0813475
2R65	XUTs	219	207	137	103	2.16589	3.24031e-18
2R67	XUTs	5	2	0	0	-1.14778	NA
2R74	XUTs	0	1	0	0	1.38838	NA
2R82	XUTs	5	4	1	0	-0.187984	NA
2R85	XUTs	465	411	83	64	0.424244	0.156981
2R86	XUTs	0	0	0	0	NA	NA
2R91	XUTs	11	6	0	0	-2.46112	NA
2R93	XUTs	19	5	3	3	1.12892	0.430044
3F108	XUTs	84	35	7	13	0.562161	0.475359
3F11	XUTs	49	35	2	4	-0.744177	0.520614
3F111	XUTs	2	9	0	0	-2.04525	NA
3F12	XUTs	26	23	1	0	-2.62727	0.210246
3F130	XUTs	3	1	0	0	-0.32255	NA
3F132	XUTs	75	63	5	7	-0.490517	0.572056
3F31	XUTs	38	22	7	3	0.427495	0.702385
3F33	XUTs	46	48	0	2	-2.52418	0.0850783
3F39	XUTs	0	0	0	0	NA	NA
3F45	XUTs	1	0	0	0	1.64432	NA
3F5	XUTs	1316	841	0	0	-9.46613	8.92784e-10
3F51	XUTs	95	58	6	0	-1.70063	0.0875842
3F58	XUTs	111	138	17	11	-0.202878	0.766089
3F6	XUTs	1363	853	1	2	-6.49142	5.90656e-13
3F61	XUTs	23	11	3	2	0.290113	0.856533
3F65	XUTs	5	12	5	5	2.1731	0.0532719
3F70	XUTs	49	39	0	0	-4.87659	0.00923155
3F71	XUTs	212	136	10	10	-1.0761	0.0541885
3F74	XUTs	28	8	2	2	-0.0438906	0.979521
3F78	XUTs	103	104	6	11	-0.578581	0.427737
3F82	XUTs	0	0	0	0	NA	NA
3F84	XUTs	3	1	0	0	-0.32255	NA
3F92	XUTs	3	1	0	0	-0.32255	NA
3F94	XUTs	29	21	3	0	-1.11538	0.498028
3F99	XUTs	31	21	7	0	0.0254893	0.985369
3R100	XUTs	8	10	0	0	-2.63951	0.365298
3R106	XUTs	104	68	16	7	0.0987424	0.897744
3R119	XUTs	20	5	0	0	-2.94028	0.280198
3R124	XUTs	4	5	0	0	-1.63946	NA
3R130	XUTs	0	2	0	0	0.342501	NA
3R136	XUTs	46	52	9	6	0.256603	0.78107
3R144	XUTs	64	56	4	4	-0.89703	0.351093
3R147	XUTs	7	1	0	0	-1.25719	NA
3R18	XUTs	5	2	1	0	0.243307	NA
3R28	XUTs	3	0	0	0	0.224321	NA
3R41	XUTs	21	28	0	1	-2.63017	0.205417
3R44	XUTs	115	70	16	13	0.369277	0.55621
3R46	XUTs	116	105	7	5	-1.21186	0.0908832
3R54	XUTs	3	1	0	0	-0.32255	NA
3R67	XUTs	40	46	4	11	0.52857	0.563515
3R8	XUTs	3	5	0	0	-1.50099	NA
3R90	XUTs	0	0	0	0	NA	NA
4F115	XUTs	105	85	27	30	1.29916	0.00249567
4F117	XUTs	28	27	0	0	-4.22101	0.0392622
4F127	XUTs	26	26	2	1	-1.14869	0.460315
4F132	XUTs	1	0	0	0	1.64432	NA
4F137	XUTs	24	15	0	0	-3.67449	0.103552
4F14	XUTs	17	8	0	0	-3.00129	0.25598
4F142	XUTs	25	19	9	6	1.45535	0.0860036
4F148	XUTs	6	10	0	0	-2.50112	0.410246
4F160	XUTs	103	118	16	11	-0.0699591	0.924596
4F161	XUTs	69	65	7	3	-0.779319	0.386999
4F162	XUTs	33	31	8	4	0.553964	0.576428
4F175	XUTs	281	202	17	11	-1.09548	0.0196027
4F180	XUTs	4	0	0	0	-0.186803	NA
4F181	XUTs	12	20	1	2	-0.439677	0.811991
4F19	XUTs	1	2	0	0	-0.104231	NA
4F193	XUTs	44	23	4	8	0.630533	0.520374
4F194	XUTs	8	2	2	0	0.684495	0.805101
4F204	XUTs	159	125	2	1	-3.56261	0.000639797
4F206	XUTs	1	2	0	0	-0.104231	NA
4F207	XUTs	0	3	0	0	-0.247808	NA
4F231	XUTs	9	6	0	0	-2.3034	NA
4F238	XUTs	29	18	8	9	1.59428	0.0432348
4F240	XUTs	16	17	0	0	-3.49534	0.136212
4F241	XUTs	1	10	1	0	-0.677622	0.838129
4F242	XUTs	11	8	4	4	1.79059	0.132346
4F248	XUTs	111	79	16	3	-0.364029	0.641339
4F253	XUTs	139	99	20	15	0.25571	0.661554
4F255	XUTs	406	458	27	17	-1.33813	0.00073316
4F267	XUTs	188	118	14	12	-0.515338	0.372471
4F272	XUTs	46	32	14	18	1.77602	0.00204245
4F273	XUTs	12	5	0	0	-2.43201	NA
4F278	XUTs	36	29	7	6	0.694487	0.451468
4F28	XUTs	0	0	0	0	NA	NA
4F285	XUTs	20	28	2	0	-1.70325	0.346472
4F288	XUTs	1	1	0	0	0.556988	NA
4F293	XUTs	24	16	0	1	-2.2538	0.303601
4F297	XUTs	0	0	0	0	NA	NA
4F30	XUTs	72	93	10	16	0.33947	0.640193
4F300	XUTs	36	44	26	20	2.1754	1.81688e-05
4F303	XUTs	79	50	15	9	0.59432	0.382164
4F306	XUTs	68	62	25	14	1.24043	0.0176763
4F309	XUTs	5	1	1	0	0.518305	NA
4F316	XUTs	4	2	0	0	-0.949051	NA
4F32	XUTs	123	130	2	1	-3.4312	0.00129537
4F321	XUTs	0	0	0	0	NA	NA
4F328	XUTs	96	56	11	9	0.121324	0.878945
4F331	XUTs	1	0	0	0	1.64432	NA
4F339	XUTs	34	21	1	2	-1.12273	0.462834
4F34	XUTs	4	2	0	0	-0.949051	NA
4F340	XUTs	15	24	2	2	-0.337662	0.83923
4F341	XUTs	132	123	7	2	-1.86425	0.0128858
4F342	XUTs	9	11	4	0	0.528996	0.786575
4F348	XUTs	49	37	3	7	-0.0303208	0.977503
4F350	XUTs	7	2	0	0	-1.47809	NA
4F352	XUTs	9	12	0	4	0.704398	0.693186
4F354	XUTs	6	1	0	0	-1.07415	NA
4F361	XUTs	7	6	0	0	-2.12628	NA
4F376	XUTs	9	4	1	0	-0.652627	0.836631
4F377	XUTs	11	22	1	1	-1.12399	0.566985
4F381	XUTs	0	0	0	0	NA	NA
4F384	XUTs	39	41	2	0	-2.39256	0.124869
4F395	XUTs	171	105	3	5	-2.0476	0.00621009
4F416	XUTs	17	11	0	0	-3.20042	0.201839
4F426	XUTs	3	2	0	0	-0.718458	NA
4F43	XUTs	67	61	4	4	-0.995029	0.28794
4F435	XUTs	14	12	1	2	-0.0663535	0.97224
4F441	XUTs	3	3	0	0	-1.0288	NA
4F446	XUTs	92	83	10	8	-0.283249	0.713165
4F447	XUTs	35	40	5	5	0.0787135	0.946046
4F448	XUTs	2	1	0	1	1.56668	NA
4F449	XUTs	18	11	0	1	-1.77245	0.456928
4F467	XUTs	92	81	7	3	-1.13829	0.162591
4F473	XUTs	20	32	0	0	-4.19749	0.0433165
4F478	XUTs	25	23	2	6	0.485031	0.693036
4F491	XUTs	24	9	2	0	-1.03269	0.621759
4F497	XUTs	13	9	4	3	1.37223	0.284701
4F50	XUTs	140	89	16	7	-0.309191	0.649872
4F500	XUTs	294	237	56	31	0.378562	0.315017
4F505	XUTs	7	1	1	0	0.128041	NA
4F521	XUTs	3	1	0	0	-0.32255	NA
4F522	XUTs	2	2	0	0	-0.443804	NA
4F523	XUTs	5	11	0	0	-2.52903	0.40411
4F524	XUTs	79	65	2	3	-1.82263	0.0683484
4F526	XUTs	90	80	1	3	-2.382	0.0204205
4F529	XUTs	111	74	15	9	0.0697095	0.927311
4F531	XUTs	4	2	0	0	-0.949051	NA
4F532	XUTs	165	119	20	17	0.0866852	0.88413
4F544	XUTs	31	17	2	1	-0.966956	0.550957
4F546	XUTs	15	11	1	0	-1.6983	0.495105
4F562	XUTs	9	5	0	1	-0.693017	0.815024
4F582	XUTs	12	9	1	0	-1.39507	0.597765
4F592	XUTs	45	41	2	3	-1.08374	0.358161
4F597	XUTs	23	31	6	3	0.345318	0.774659
4F605	XUTs	92	56	6	7	-0.44908	0.593975
4F609	XUTs	0	0	1	1	5.46575	0.0724013
4F617	XUTs	56	41	5	3	-0.592415	0.57147
4F622	XUTs	18	18	2	1	-0.619618	0.726288
4F626	XUTs	0	0	0	0	NA	NA
4F63	XUTs	0	0	0	0	NA	NA
4F639	XUTs	15	18	8	9	2.04548	0.0120993
4F642	XUTs	74	58	14	8	0.410575	0.570412
4F643	XUTs	2	2	1	0	0.954335	NA
4F645	XUTs	25	15	1	1	-1.27205	0.494187
4F652	XUTs	9	10	0	1	-1.21969	0.646522
4F655	XUTs	15	12	2	0	-0.82711	0.70665
4F66	XUTs	21	15	0	0	-3.57444	0.120532
4F661	XUTs	15	12	1	1	-0.734865	0.725471
4F669	XUTs	67	64	9	2	-0.637485	0.490109
4F675	XUTs	41	22	0	2	-1.85397	0.259233
4F685	XUTs	214	150	17	19	-0.293013	0.583801
4F689	XUTs	14	11	5	3	1.35441	0.259752
4F692	XUTs	1	0	0	0	1.64432	NA
4F697	XUTs	4	8	0	0	-2.10466	NA
4F700	XUTs	63	60	15	13	0.8651	0.160637
4F703	XUTs	3	0	0	0	0.224321	NA
4F705	XUTs	31	28	0	0	-4.31463	0.0324413
4F707	XUTs	20	18	0	1	-2.21344	0.316427
4F709	XUTs	6	0	0	0	-0.771329	NA
4F711	XUTs	47	56	6	2	-0.758766	0.467193
4F87	XUTs	7	1	0	1	0.240748	0.946046
4F90	XUTs	0	0	0	0	NA	NA
4F92	XUTs	5	2	0	0	-1.14778	NA
4R1	XUTs	5	2	1	0	0.243307	NA
4R100	XUTs	36	24	2	1	-1.30867	0.382735
4R104	XUTs	0	0	0	0	NA	NA
4R120	XUTs	30	34	0	0	-4.45846	0.0244583
4R125	XUTs	29	12	2	2	-0.265804	0.873166
4R15	XUTs	3	0	0	0	0.224321	NA
4R155	XUTs	32	28	8	2	0.358434	0.756322
4R167	XUTs	2	1	1	0	1.43606	NA
4R172	XUTs	12	5	0	0	-2.43201	NA
4R177	XUTs	6	10	0	0	-2.50112	0.410246
4R182	XUTs	4	3	0	0	-1.21756	NA
4R190	XUTs	59	79	12	8	0.158355	0.851484
4R195	XUTs	1	0	1	0	3.02033	NA
4R200	XUTs	4	6	2	0	0.513825	0.851484
4R203	XUTs	45	36	4	2	-0.764522	0.514645
4R212	XUTs	21	15	2	0	-1.22054	0.538941
4R218	XUTs	31	35	2	0	-2.12871	0.194652
4R231	XUTs	5	0	0	0	-0.508497	NA
4R234	XUTs	3	1	0	1	1.1847	NA
4R237	XUTs	65	42	4	2	-1.14078	0.284595
4R246	XUTs	4	3	2	0	1.09427	0.691811
4R252	XUTs	19	17	11	7	1.99019	0.0112445
4R253	XUTs	1	3	3	2	3.24392	0.0587362
4R255	XUTs	24	13	0	0	-3.58234	0.119855
4R263	XUTs	742	623	103	72	0.0342236	0.918151
4R265	XUTs	102	86	0	4	-2.4951	0.0139524
4R27	XUTs	23	7	7	4	1.63077	0.121054
4R274	XUTs	47	28	2	1	-1.61679	0.24896
4R283	XUTs	6	1	0	0	-1.07415	NA
4R298	XUTs	26	29	3	2	-0.493903	0.724019
4R303	XUTs	54	31	0	1	-3.33779	0.074272
4R309	XUTs	17	13	0	0	-3.31936	0.173246
4R313	XUTs	3	5	2	2	1.96595	0.267771
4R327	XUTs	7	17	0	0	-3.12339	0.230955
4R329	XUTs	21	20	18	9	2.36639	0.000331152
4R333	XUTs	1	0	1	0	3.02033	NA
4R336	XUTs	125	74	8	7	-0.681358	0.351517
4R342	XUTs	10	6	1	1	0.0537099	0.981831
4R346	XUTs	15	12	2	1	-0.18103	0.928634
4R364	XUTs	47	23	3	2	-0.751377	0.562523
4R365	XUTs	14	14	0	2	-0.722926	0.728565
4R370	XUTs	47	28	2	3	-0.836852	0.502731
4R372	XUTs	197	158	38	30	0.627844	0.112424
4R374	XUTs	1	0	0	0	1.64432	NA
4R393	XUTs	181	104	59	40	1.51078	5.89463e-06
4R40	XUTs	1	1	0	0	0.556988	NA
4R411	XUTs	52	22	5	5	0.203614	0.857807
4R418	XUTs	2	1	0	0	0.0508508	NA
4R423	XUTs	60	53	9	9	0.364575	0.650403
4R446	XUTs	85	56	15	13	0.706166	0.249325
4R45	XUTs	65	69	8	6	-0.282117	0.750548
4R456	XUTs	67	92	23	12	0.742607	0.22261
4R458	XUTs	4	4	1	0	-0.0432178	NA
4R461	XUTs	18	7	1	2	0.0738799	0.969919
4R468	XUTs	25	31	0	0	-4.27612	0.0360209
4R483	XUTs	347	251	28	27	-0.409182	0.323929
4R486	XUTs	48	26	13	6	1.0578	0.168914
4R488	XUTs	5	0	0	0	-0.508497	NA
4R491	XUTs	202	107	14	13	-0.451692	0.442955
4R506	XUTs	201	171	32	17	0.0568892	0.91793
4R514	XUTs	26	17	4	0	-0.487541	0.773572
4R515	XUTs	60	57	7	4	-0.435313	0.644575
4R521	XUTs	0	1	0	0	1.38838	NA
4R527	XUTs	379	165	19	6	-1.4057	0.00662739
4R529	XUTs	53	46	1	1	-2.62635	0.0703604
4R535	XUTs	5	0	2	0	1.74621	0.568422
4R546	XUTs	22	5	1	0	-1.63832	0.524649
4R548	XUTs	30	18	2	1	-0.976596	0.545554
4R549	XUTs	37	28	4	2	-0.441951	0.73157
4R55	XUTs	11	10	1	0	-1.41683	0.590702
4R552	XUTs	155	100	5	4	-1.79106	0.0149259
4R56	XUTs	49	19	1	0	-3.00645	0.130999
4R57	XUTs	97	91	29	27	1.26112	0.00374172
4R570	XUTs	2	1	0	0	0.0508508	NA
4R585	XUTs	20	14	3	2	0.251088	0.873281
4R592	XUTs	4	0	0	0	-0.186803	NA
4R597	XUTs	0	0	0	0	NA	NA
4R599	XUTs	8	9	2	1	0.448875	0.82794
4R608	XUTs	5	13	3	2	1.04268	0.517871
4R617	XUTs	15	16	1	0	-1.99289	0.397773
4R618	XUTs	0	2	1	0	1.76636	NA
4R619	XUTs	20	29	3	1	-0.707094	0.643865
4R68	XUTs	1	0	0	0	1.64432	NA
4R71	XUTs	103	66	1	2	-2.7643	0.0148197
4R81	XUTs	242	159	29	28	0.231269	0.618607
4R9	XUTs	40	25	0	1	-2.95629	0.131963
4R92	XUTs	102	115	11	2	-1.14765	0.129656
4R94	XUTs	173	114	33	17	0.485937	0.310162
5F101	XUTs	49	62	2	2	-1.83057	0.112578
5F112	XUTs	17	7	1	1	-0.493766	0.825406
5F115	XUTs	2	0	0	0	0.801281	NA
5F117	XUTs	9	7	0	0	-2.41446	NA
5F12	XUTs	13	6	3	3	1.41711	0.310277
5F122	XUTs	11	2	0	0	-1.97279	NA
5F125	XUTs	37	34	4	1	-0.877446	0.4951
5F126	XUTs	9	2	1	0	-0.353972	0.91793
5F128	XUTs	2315	1862	178	104	-0.900203	8.39802e-06
5F129	XUTs	177	163	0	2	-4.39938	0.000263677
5F136	XUTs	20	18	1	0	-2.26506	0.310991
5F139	XUTs	292	299	56	40	0.355091	0.352817
5F140	XUTs	0	0	0	0	NA	NA
5F151	XUTs	16	9	16	7	2.88304	0.000106612
5F166	XUTs	13	7	1	1	-0.257572	0.913342
5F171	XUTs	42	32	9	9	0.992977	0.193798
5F174	XUTs	2	1	0	0	0.0508508	NA
5F180	XUTs	28	28	4	4	0.193025	0.876945
5F185	XUTs	4	11	0	0	-2.45609	0.429774
5F191	XUTs	83	95	12	7	-0.273373	0.724798
5F195	XUTs	33	16	3	1	-0.587023	0.707876
5F207	XUTs	7	12	0	0	-2.75204	0.3326
5F21	XUTs	37	28	6	7	0.71952	0.433789
5F213	XUTs	57	32	1	3	-1.38082	0.265971
5F217	XUTs	129	55	12	7	-0.21356	0.790331
5F218	XUTs	16	9	0	0	-3.02097	0.249507
5F222	XUTs	4	2	0	0	-0.949051	NA
5F223	XUTs	38	32	0	0	-4.55305	0.0195194
5F233	XUTs	0	0	0	0	NA	NA
5F238	XUTs	13	18	2	2	0.0107072	0.99538
5F239	XUTs	223	172	8	2	-2.31989	0.000381021
5F24	XUTs	29	18	3	1	-0.553079	0.723859
5F248	XUTs	1	4	0	1	0.635336	NA
5F255	XUTs	167	100	47	34	1.31607	0.000252086
5F256	XUTs	0	0	0	0	NA	NA
5F33	XUTs	0	0	0	0	NA	NA
5F52	XUTs	19	29	1	1	-1.64051	0.350655
5F55	XUTs	8	2	1	1	0.809826	0.749843
5F62	XUTs	7	17	3	4	1.16421	0.38562
5F67	XUTs	17	13	10	4	1.87601	0.0402023
5F68	XUTs	4	0	0	0	-0.186803	NA
5F7	XUTs	66	32	7	5	0.0292284	0.97708
5F75	XUTs	54	57	8	8	0.200549	0.821863
5F90	XUTs	0	0	0	0	NA	NA
5F98	XUTs	17	14	0	1	-1.90464	0.412673
5R11	XUTs	247	199	16	13	-0.932573	0.0519254
5R111	XUTs	165	102	7	8	-1.09936	0.0897095
5R115	XUTs	9	4	4	4	2.37879	0.0520085
5R12	XUTs	28	26	1	1	-1.75612	0.299012
5R126	XUTs	146	155	13	13	-0.54202	0.362405
5R129	XUTs	113	74	22	14	0.643326	0.237665
5R135	XUTs	2	0	1	0	2.15134	NA
5R139	XUTs	1	1	1	0	1.95504	NA
5R142	XUTs	18	9	3	2	0.617298	0.693517
5R144	XUTs	202	78	5	4	-1.86968	0.0137288
5R148	XUTs	24	18	1	2	-0.751101	0.653036
5R151	XUTs	58	63	1	1	-2.94277	0.0351426
5R165	XUTs	4	0	0	0	-0.186803	NA
5R166	XUTs	26	12	1	2	-0.551952	0.756069
5R168	XUTs	66	44	6	9	0.192818	0.832582
5R182	XUTs	8	3	0	0	-1.79327	NA
5R192	XUTs	10	2	0	0	-1.86413	NA
5R194	XUTs	181	165	28	10	-0.234331	0.685376
5R205	XUTs	0	0	0	0	NA	NA
5R207	XUTs	0	0	0	0	NA	NA
5R211	XUTs	36	37	1	0	-3.21616	0.0940796
5R216	XUTs	2	5	0	1	0.171595	0.960325
5R225	XUTs	42	56	0	0	-5.09186	0.00579213
5R227	XUTs	2	5	0	0	-1.34788	NA
5R230	XUTs	36	18	0	0	-4.1189	0.0481521
5R232	XUTs	41	18	0	0	-4.23262	0.0390925
5R239	XUTs	4	2	0	0	-0.949051	NA
5R245	XUTs	1	0	0	0	1.64432	NA
5R247	XUTs	0	1	0	0	1.38838	NA
5R26	XUTs	6	10	2	2	0.95437	0.583899
5R36	XUTs	65	58	2	1	-2.37359	0.0509925
5R40	XUTs	5	5	1	0	-0.363724	0.913925
5R48	XUTs	0	0	0	0	NA	NA
5R72	XUTs	8	4	0	0	-1.949	NA
5R74	XUTs	19	15	3	1	-0.115416	0.948485
5R75	XUTs	66	58	8	4	-0.391245	0.670778
5R76	XUTs	113	105	27	18	0.709212	0.149511
5R81	XUTs	26	25	4	3	0.123596	0.928445
5R90m	XUTs	36	20	3	0	-1.24667	0.434884
5R93	XUTs	221	175	36	30	0.431632	0.296459
5R97	XUTs	51	28	7	11	0.961027	0.218191
6F104	XUTs	23	21	3	7	0.926179	0.384632
6F106	XUTs	5	6	0	0	-1.92434	NA
6F108	XUTs	1	6	0	0	-1.40944	NA
6F13	XUTs	0	0	0	0	NA	NA
6F15	XUTs	0	0	0	0	NA	NA
6F22	XUTs	309	202	74	45	0.914042	0.00258374
6F28	XUTs	1	0	0	0	1.64432	NA
6F34	XUTs	57	53	3	7	-0.412454	0.679926
6F39	XUTs	5	6	1	0	-0.520533	0.872371
6F46	XUTs	20	16	1	1	-1.15166	0.545554
6F52	XUTs	124	122	0	4	-2.77886	0.152795
6F62	XUTs	40	27	1	3	-0.985949	0.465709
6F83	XUTs	1	0	1	0	3.02033	NA
6F87	XUTs	0	2	1	0	1.76636	NA
6F9	XUTs	0	0	0	0	NA	NA
6R1	XUTs	0	0	0	0	NA	NA
6R108	XUTs	3	1	1	0	1.05945	NA
6R114	XUTs	0	0	0	0	NA	NA
6R115	XUTs	401	232	33	32	-0.223441	0.600235
6R13	XUTs	0	0	0	0	NA	NA
6R17	XUTs	0	0	0	0	NA	NA
6R28	XUTs	23	26	0	0	-4.07285	0.052681
6R35	XUTs	0	0	0	0	NA	NA
6R39	XUTs	34	22	2	5	0.0937801	0.945458
6R50	XUTs	102	60	9	3	-0.747639	0.369715
6R53	XUTs	7	8	1	0	-0.960285	0.74395
6R65	XUTs	23	29	1	0	-2.75318	0.182482
6R66	XUTs	13	8	0	0	-2.77963	0.320644
6R7	XUTs	4	2	0	0	-0.949051	NA
6R81	XUTs	18	5	0	0	-2.82905	0.311435
6R82	XUTs	6	1	0	0	-1.07415	NA
6R86	XUTs	0	0	0	0	NA	NA
6R94	XUTs	25	18	6	6	1.19715	0.2069
7F110	XUTs	8	9	0	0	-2.545	0.394072
7F114	XUTs	2	2	0	1	1.08062	NA
7F126	XUTs	34	34	4	0	-1.18204	0.399282
7F130	XUTs	61	46	9	3	-0.180771	0.858697
7F133	XUTs	69	45	11	5	0.170997	0.850102
7F144	XUTs	10	5	0	1	-0.782805	0.788534
7F158	XUTs	94	99	6	10	-0.574708	0.444291
7F16	XUTs	33	18	2	3	-0.266882	0.857284
7F163	XUTs	7	8	0	0	-2.36624	NA
7F17	XUTs	0	2	1	1	2.86846	0.307891
7F175	XUTs	5	7	1	2	1.0111	0.61179
7F177	XUTs	3	0	0	0	0.224321	NA
7F185	XUTs	4	6	0	0	-1.8117	NA
7F206	XUTs	16	1	1	0	-0.913205	0.770935
7F209	XUTs	1	1	1	0	1.95504	NA
7F211	XUTs	127	105	9	5	-1.05953	0.122358
7F213	XUTs	92	93	11	4	-0.676586	0.377548
7F236	XUTs	7	5	0	0	-1.98948	NA
7F261	XUTs	348	316	128	88	1.36855	4.40573e-08
7F267	XUTs	11	17	2	3	0.495165	0.753347
7F271	XUTs	1	1	1	0	1.95504	NA
7F276	XUTs	29	27	13	1	0.88791	0.388696
7F281	XUTs	12	8	2	1	0.270065	0.895516
7F283	XUTs	71	60	13	9	0.424347	0.556
7F291	XUTs	2	3	0	1	0.713083	NA
7F296	XUTs	58	45	2	5	-0.816535	0.437688
7F31	XUTs	79	67	5	2	-1.40408	0.129702
7F311	XUTs	25	21	2	0	-1.58452	0.386471
7F323	XUTs	29	27	6	6	0.788553	0.41203
7F324	XUTs	106	95	31	20	1.00906	0.0261375
7F333	XUTs	25	16	0	2	-1.23742	0.504407
7F339	XUTs	6	17	0	0	-3.07556	0.245816
7F347	XUTs	32	29	3	0	-1.4212	0.354733
7F353	XUTs	30	32	5	9	0.88709	0.325313
7F358	XUTs	1	2	0	0	-0.104231	NA
7F36	XUTs	12	10	3	2	0.860974	0.576057
7F362	XUTs	2	0	0	0	0.801281	NA
7F368	XUTs	14	17	0	0	-3.42051	0.152892
7F375	XUTs	60	46	2	6	-0.653702	0.526278
7F380	XUTs	67	98	18	8	0.243349	0.750744
7F384	XUTs	89	82	8	3	-0.99537	0.220103
7F391	XUTs	3	5	0	0	-1.50099	NA
7F393	XUTs	10	7	0	0	-2.48963	0.410255
7F400	XUTs	43	21	8	2	0.326693	0.779197
7F402	XUTs	4	4	1	0	-0.0432178	NA
7F406	XUTs	27	19	3	0	-0.994649	0.557281
7F409	XUTs	6	5	0	1	-0.383982	0.902797
7F413	XUTs	0	0	0	0	NA	NA
7F414	XUTs	60	37	4	6	-0.205831	0.846927
7F426	XUTs	113	68	30	28	1.4119	0.000826833
7F437	XUTs	227	183	69	46	1.16643	0.000146346
7F439	XUTs	253	170	20	14	-0.613125	0.206482
7F44	XUTs	5	2	23	21	5.70461	4.15958e-14
7F447	XUTs	93	45	4	2	-1.47506	0.138573
7F455	XUTs	11	11	1	0	-1.49428	0.565051
7F460	XUTs	45	21	0	0	-4.40089	0.0276111
7F466	XUTs	0	0	0	0	NA	NA
7F469	XUTs	30	25	4	1	-0.501537	0.72479
7F470	XUTs	8	3	1	0	-0.397287	0.905317
7F471	XUTs	2	1	0	1	1.56668	NA
7F475	XUTs	72	65	13	14	0.67569	0.287154
7F478	XUTs	4	3	1	0	0.179711	NA
7F479	XUTs	1	0	1	0	3.02033	NA
7F48	XUTs	7	5	0	0	-1.98948	NA
7F480	XUTs	2	6	2	0	0.769891	0.78313
7F59	XUTs	12	5	1	1	0.00290485	0.998954
7F64	XUTs	4	4	0	0	-1.44386	NA
7F65	XUTs	45	23	1	1	-2.02251	0.208996
7F7	XUTs	0	0	0	0	NA	NA
7F71	XUTs	7	1	0	0	-1.25719	NA
7F76	XUTs	105	81	6	7	-0.806976	0.285092
7F91	XUTs	0	1	0	0	1.38838	NA
7F95	XUTs	6	8	2	2	1.17004	0.500433
7R104	XUTs	4	1	0	0	-0.618809	NA
7R105	XUTs	9	8	4	2	1.47299	0.300134
7R114	XUTs	2	1	0	0	0.0508508	NA
7R116	XUTs	57	35	0	0	-4.91062	0.00852047
7R12	XUTs	1	2	0	0	-0.104231	NA
7R123	XUTs	12	7	54	31	5.17113	4.43433e-25
7R124	XUTs	31	18	3	1	-0.605617	0.696066
7R129	XUTs	15	18	4	4	0.941486	0.433138
7R131	XUTs	0	1	0	0	1.38838	NA
7R133	XUTs	75	64	8	5	-0.426617	0.618607
7R135	XUTs	15	6	1	1	-0.298121	0.898416
7R144	XUTs	87	70	11	12	0.258674	0.720728
7R159	XUTs	21	17	1	0	-2.25289	0.314406
7R165	XUTs	35	32	6	5	0.39392	0.705439
7R168	XUTs	5	2	0	1	0.355157	NA
7R172	XUTs	78	56	5	2	-1.2621	0.186289
7R173	XUTs	118	93	15	11	-0.0119001	0.985566
7R174	XUTs	52	23	1	1	-2.14874	0.173862
7R181	XUTs	18	11	0	0	-3.24449	0.190919
7R184	XUTs	3	2	0	0	-0.718458	NA
7R187	XUTs	57	30	8	5	0.300151	0.758466
7R19	XUTs	63	50	6	12	0.417655	0.606682
7R2	XUTs	0	0	0	0	NA	NA
7R20	XUTs	29	32	4	8	0.688506	0.484726
7R21	XUTs	4	0	0	0	-0.186803	NA
7R213	XUTs	37	23	4	6	0.490363	0.647807
7R228	XUTs	41	22	2	5	-0.0573298	0.965045
7R231	XUTs	2	2	2	0	1.86705	0.5093
7R238	XUTs	85	45	5	5	-0.633778	0.490981
7R243	XUTs	225	136	25	11	-0.314816	0.565461
7R245	XUTs	194	181	60	43	1.12546	0.000678609
7R25	XUTs	2	0	0	0	0.801281	NA
7R255	XUTs	4	6	0	1	-0.307163	0.925873
7R261	XUTs	3	11	5	2	1.84077	0.196517
7R262	XUTs	46	40	3	2	-1.11113	0.347398
7R264	XUTs	97	58	13	10	0.288686	0.689074
7R269	XUTs	91	84	7	3	-1.16032	0.153675
7R275	XUTs	14	12	2	1	-0.134248	0.947106
7R276	XUTs	0	0	0	0	NA	NA
7R295	XUTs	12	14	0	1	-1.68616	0.487919
7R298	XUTs	4	1	2	2	2.78944	0.130325
7R303	XUTs	0	0	1	0	4.40079	NA
7R305	XUTs	39	63	11	7	0.420515	0.626646
7R308	XUTs	2	4	0	0	-1.10446	NA
7R315	XUTs	90	82	7	4	-0.985705	0.21834
7R319	XUTs	32	26	0	1	-2.82036	0.159142
7R322	XUTs	74	59	8	3	-0.618316	0.490488
7R326	XUTs	9	2	1	1	0.68162	0.788446
7R328	XUTs	10	5	2	1	0.712139	0.728565
7R336	XUTs	7	2	0	0	-1.47809	NA
7R340	XUTs	47	51	11	13	0.977702	0.14871
7R348	XUTs	0	0	0	0	NA	NA
7R35	XUTs	0	0	1	0	4.40079	NA
7R360	XUTs	17	16	0	2	-0.959805	0.625874
7R365	XUTs	680	398	25	25	-1.37298	6.84562e-05
7R374	XUTs	104	85	5	4	-1.38531	0.0825755
7R383	XUTs	2	4	0	0	-1.10446	NA
7R384	XUTs	6	4	2	0	0.598593	0.825584
7R404	XUTs	75	39	6	5	-0.313393	0.749982
7R411	XUTs	43	17	2	3	-0.468776	0.73918
7R418	XUTs	736	480	24	14	-1.97878	1.78337e-08
7R42	XUTs	5	7	2	0	0.260939	0.925086
7R424	XUTs	0	0	0	0	NA	NA
7R426	XUTs	11	2	1	0	-0.578795	0.859224
7R43	XUTs	7	9	0	0	-2.47276	0.416926
7R433	XUTs	129	73	20	15	0.516681	0.359633
7R435	XUTs	0	11	0	0	-2.12432	NA
7R45	XUTs	12	11	0	0	-2.95728	0.267549
7R459	XUTs	216	213	8	3	-2.32277	0.000215396
7R460	XUTs	2	2	0	0	-0.443804	NA
7R469	XUTs	46	29	10	3	0.457094	0.643131
7R483	XUTs	22	17	3	1	-0.309688	0.854391
7R5	XUTs	170	177	1	1	-4.46191	0.000231723
7R51	XUTs	6	1	0	0	-1.07415	NA
7R63	XUTs	23	26	7	10	1.49202	0.0638393
7R7	XUTs	0	1	0	0	1.38838	NA
7R77	XUTs	54	52	15	11	0.961369	0.132699
7R88	XUTs	27	17	3	1	-0.460224	0.775003
7R9	XUTs	0	0	0	0	NA	NA
7R93	XUTs	76	58	1	0	-4.0533	0.0202557
7R97	XUTs	0	0	0	0	NA	NA
8F102	XUTs	2	5	1	0	0.0579142	NA
8F104	XUTs	84	53	7	10	0.0595386	0.946818
8F113	XUTs	0	3	0	0	-0.247808	NA
8F117	XUTs	6	8	1	0	-0.878166	0.76954
8F123	XUTs	1	0	0	0	1.64432	NA
8F13	XUTs	5	8	0	0	-2.1972	NA
8F130	XUTs	77	86	4	4	-1.3684	0.115489
8F131	XUTs	130	144	1	4	-2.77214	0.00156292
8F134	XUTs	10	2	0	2	0.68474	0.786138
8F135	XUTs	28	29	2	0	-1.9114	0.264438
8F144	XUTs	1	0	0	0	1.64432	NA
8F158	XUTs	62	50	10	7	0.284089	0.735931
8F159	XUTs	31	25	7	5	0.783256	0.416039
8F162	XUTs	1	0	1	0	3.02033	NA
8F165	XUTs	0	3	0	0	-0.247808	NA
8F168	XUTs	43	36	3	3	-0.703315	0.549738
8F18	XUTs	2	1	0	0	0.0508508	NA
8F190	XUTs	0	0	0	0	NA	NA
8F193	XUTs	66	60	6	5	-0.519217	0.566278
8F2	XUTs	475	466	30	32	-0.919544	0.0105573
8F204	XUTs	14	12	0	0	-3.12629	0.221277
8F212	XUTs	4	3	0	0	-1.21756	NA
8F22	XUTs	18	23	0	0	-3.82968	0.0817412
8F226	XUTs	20	18	0	0	-3.67949	0.10286
8F229	XUTs	10	8	1	0	-1.18158	0.672142
8F237	XUTs	66	51	15	10	0.779309	0.232062
8F239	XUTs	14	8	0	0	-2.83832	0.302637
8F245	XUTs	0	0	0	0	NA	NA
8F246	XUTs	34	22	0	0	-4.20043	0.0405591
8F32	XUTs	0	0	0	0	NA	NA
8F36	XUTs	116	73	0	0	-5.95209	0.000489747
8F44	XUTs	56	59	2	1	-2.29619	0.0638617
8F48	XUTs	6	3	1	2	1.52846	0.445237
8F65	XUTs	39	30	4	1	-0.816495	0.530329
8F67	XUTs	28	16	3	1	-0.449971	0.780634
8F72	XUTs	32	26	18	9	1.87973	0.00327574
8F76	XUTs	29	30	0	0	-4.3305	0.031694
8F77	XUTs	14	7	1	0	-1.35078	0.6141
8F87	XUTs	82	52	1	0	-4.03203	0.0211563
8F92	XUTs	166	115	30	19	0.494394	0.296459
8R10	XUTs	122	104	14	13	-0.0521298	0.941754
8R111	XUTs	5	4	0	0	-1.58768	NA
8R113	XUTs	10	8	1	5	1.53118	0.273599
8R115	XUTs	42	24	2	6	0.071964	0.95571
8R117	XUTs	27	26	3	3	-0.140269	0.921485
8R118	XUTs	46	38	2	4	-0.760506	0.510306
8R125	XUTs	33	19	4	6	0.705726	0.505911
8R129	XUTs	0	0	0	0	NA	NA
8R130	XUTs	0	0	0	0	NA	NA
8R135	XUTs	4	7	0	0	-1.96559	NA
8R137	XUTs	11	10	0	0	-2.82506	0.306004
8R142	XUTs	1	0	0	0	1.64432	NA
8R157	XUTs	60	39	1	0	-3.60023	0.0488343
8R16	XUTs	0	0	0	0	NA	NA
8R165	XUTs	4	4	0	1	0.0637948	0.98385
8R171m	XUTs	42	32	2	2	-1.18561	0.361942
8R172	XUTs	37	27	14	5	1.22243	0.115405
8R174	XUTs	242	113	19	10	-0.56497	0.320706
8R189	XUTs	188	149	17	14	-0.428599	0.430689
8R190	XUTs	64	65	36	13	1.53886	0.00230547
8R193	XUTs	51	94	15	9	0.308276	0.702789
8R199	XUTs	191	117	25	22	0.335195	0.500647
8R214	XUTs	13	2	0	0	-2.16822	NA
8R216	XUTs	4	4	3	0	1.45124	0.521789
8R217	XUTs	87	79	14	16	0.553439	0.36634
8R22	XUTs	7	3	2	0	0.641274	0.814482
8R221	XUTs	5	4	0	0	-1.58768	NA
8R223	XUTs	77	73	9	6	-0.338805	0.683577
8R227	XUTs	28	5	1	0	-1.9081	0.438149
8R234	XUTs	15	3	0	0	-2.44894	NA
8R241	XUTs	15	8	0	0	-2.89472	0.285873
8R242	XUTs	6	2	7	3	3.35316	0.00530601
8R246	XUTs	4	2	0	0	-0.949051	NA
8R247	XUTs	161	80	20	10	0.0309487	0.964539
8R253	XUTs	14	14	0	0	-3.25125	0.189675
8R26	XUTs	204	140	19	13	-0.405933	0.451468
8R47	XUTs	60	47	22	10	1.23892	0.0331538
8R64	XUTs	25	10	4	2	0.511824	0.724128
8R68	XUTs	44	34	1	0	-3.27803	0.084612
8R76	XUTs	5	0	0	0	-0.508497	NA
8R87	XUTs	21	7	6	3	1.42719	0.222114
8R98	XUTs	97	53	8	12	0.183251	0.819304
9F10	XUTs	56	60	7	3	-0.586934	0.541972
9F104	XUTs	2	0	0	0	0.801281	NA
9F108	XUTs	2	1	0	0	0.0508508	NA
9F111	XUTs	356	314	46	29	-0.172825	0.678526
9F113	XUTs	113	69	21	15	0.696632	0.198504
9F117	XUTs	35	29	2	0	-2.04926	0.216969
9F120	XUTs	46	45	3	2	-1.20605	0.298239
9F122	XUTs	21	36	2	0	-1.96918	0.253478
9F129	XUTs	8	6	2	0	0.108837	0.965944
9F13	XUTs	21	15	1	0	-2.1612	0.342822
9F136	XUTs	68	68	20	9	0.724475	0.253473
9F138	XUTs	198	159	25	21	0.0583891	0.916104
9F139	XUTs	150	100	24	12	0.209528	0.724431
9F143	XUTs	26	13	0	1	-2.18404	0.326305
9F152	XUTs	12	13	3	2	0.648989	0.678302
9F159	XUTs	4	3	0	0	-1.21756	NA
9F171	XUTs	10	11	0	1	-1.36572	0.595931
9F176	XUTs	209	179	10	4	-1.81435	0.00224239
9F185	XUTs	0	0	0	0	NA	NA
9F189	XUTs	228	170	25	18	-0.196616	0.703463
9F2	XUTs	2983	1595	423	293	0.372516	0.071071
9F202	XUTs	22	23	1	0	-2.52453	0.237665
9F207	XUTs	1	2	0	0	-0.104231	NA
9F210	XUTs	6	4	0	0	-1.71844	NA
9F213	XUTs	40	40	0	0	-4.76585	0.0122511
9F220	XUTs	10	9	1	2	0.38556	0.848156
9F25	XUTs	5	1	0	1	0.636383	NA
9F29	XUTs	3	5	0	0	-1.50099	NA
9F31	XUTs	0	0	1	0	4.40079	NA
9F32	XUTs	8	8	3	0	0.461469	0.836631
9F38	XUTs	60	45	1	3	-1.65655	0.155586
9F4	XUTs	917	637	64	59	-0.621992	0.0213258
9F43	XUTs	0	0	0	0	NA	NA
9F55	XUTs	53	58	1	1	-2.81872	0.0471961
9F57	XUTs	7	0	0	0	-0.993537	NA
9F63	XUTs	0	0	0	0	NA	NA
9F71	XUTs	15	15	3	1	0.0383113	0.982288
9F75	XUTs	0	0	0	1	4.57481	NA
9F9	XUTs	70	61	4	1	-1.74595	0.094511
9F90	XUTs	0	0	0	0	NA	NA
9F91	XUTs	7	5	4	1	1.69607	0.297178
9F93	XUTs	0	0	0	0	NA	NA
9F96	XUTs	87	46	7	2	-0.870728	0.357578
9F98	XUTs	12	14	0	0	-3.16217	0.213056
9R104	XUTs	0	0	0	0	NA	NA
9R117	XUTs	8	5	2	0	0.232971	0.931985
9R118	XUTs	4	5	0	0	-1.63946	NA
9R124	XUTs	21	11	1	0	-1.95834	0.408452
9R141	XUTs	2	1	0	0	0.0508508	NA
9R145	XUTs	3	3	1	0	0.370424	NA
9R14m	XUTs	62	50	2	1	-2.22717	0.0735887
9R14m2	XUTs	18	5	0	1	-1.35059	0.605062
9R150	XUTs	0	1	0	0	1.38838	NA
9R167	XUTs	24	5	0	0	-3.13984	0.228635
9R170	XUTs	2	1	1	0	1.43606	NA
9R175	XUTs	31	19	2	1	-1.03753	0.514645
9R183	XUTs	1	0	3	0	4.4876	0.112332
9R194	XUTs	15	9	1	0	-1.56139	0.542127
9R2	XUTs	4	0	1	0	1.17517	NA
9R22	XUTs	36	23	0	0	-4.27425	0.0351094
9R35	XUTs	26	20	3	4	0.32858	0.80252
9R38	XUTs	12	13	0	0	-3.09705	0.229791
9R40	XUTs	2	0	2	0	3.02511	NA
9R45	XUTs	20	6	2	3	0.765868	0.622638
9R49	XUTs	4	4	0	0	-1.44386	NA
9R51	XUTs	16	14	0	2	-0.810191	0.692644
9R53	XUTs	96	96	15	10	0.0359232	0.961636
9R55	XUTs	111	84	15	9	-0.019901	0.977551
9R56	XUTs	21	4	0	0	-2.91919	0.289787
9R63	XUTs	182	149	22	15	-0.160882	0.777171
9R77	XUTs	97	64	22	16	0.944466	0.0674912
9R84	XUTs	77	41	4	2	-1.26035	0.226885
CUT001	CUTs	31	26	3	3	-0.239936	0.864382
CUT002	CUTs	49	55	12	15	1.0539	0.105316
CUT003	CUTs	18	13	4	1	0.321155	0.850166
CUT004	CUTs	127	94	26	30	1.05834	0.0162164
CUT005	CUTs	16	14	3	0	-0.431345	0.831431
CUT006	CUTs	16	6	4	0	0.499325	0.804496
CUT007	CUTs	34	23	0	2	-1.73718	0.302726
CUT008	CUTs	16	14	0	0	-3.34508	0.172457
CUT009	CUTs	213	154	13	12	-0.856448	0.106548
CUT010	CUTs	36	54	5	3	-0.576767	0.604386
CUT011	CUTs	51	31	0	1	-3.29988	0.0793282
CUT012	CUTs	34	21	2	5	0.119366	0.932059
CUT013	CUTs	4	1	0	0	-0.626142	NA
CUT014	CUTs	2	6	0	2	1.02297	0.688999
CUT015	CUTs	24	15	0	0	-3.68366	0.105078
CUT016	CUTs	23	11	0	0	-3.45522	0.149104
CUT017	CUTs	59	43	4	2	-1.09639	0.313606
CUT018	CUTs	13	4	1	0	-1.01136	0.733806
CUT019	CUTs	73	70	22	9	0.734762	0.239914
CUT020	CUTs	13	5	0	0	-2.51439	0.416277
CUT021	CUTs	28	28	0	2	-1.75706	0.297644
CUT022	CUTs	7	2	0	0	-1.48565	NA
CUT023	CUTs	11	4	0	0	-2.24565	0.501622
CUT024	CUTs	38	27	9	10	1.26433	0.0924935
CUT025	CUTs	91	97	22	10	0.380163	0.556311
CUT026	CUTs	49	24	7	4	0.304909	0.781775
CUT027	CUTs	54	36	2	4	-0.844083	0.460472
CUT028	CUTs	13	7	1	0	-1.29951	0.635377
CUT029	CUTs	13	4	1	1	0.0236499	0.9938
CUT030	CUTs	110	76	17	15	0.486032	0.414489
CUT031	CUTs	2	1	0	0	0.0421693	NA
CUT032	CUTs	102	69	24	17	0.95322	0.0589512
CUT033	CUTs	1	2	0	0	-0.11583	NA
CUT034	CUTs	5	2	0	0	-1.15599	NA
CUT035	CUTs	49	33	9	7	0.662292	0.43217
CUT036	CUTs	1	1	0	0	0.546977	NA
CUT037	CUTs	25	14	1	0	-2.25923	0.315965
CUT038	CUTs	21	15	0	1	-2.11442	0.349745
CUT039	CUTs	13	2	2	0	0.129196	0.964189
CUT040	CUTs	81	58	2	2	-2.10115	0.052833
CUT041	CUTs	61	20	1	0	-3.2502	0.0935277
CUT042	CUTs	3	2	0	0	-0.727775	NA
CUT043	CUTs	26	18	2	5	0.431922	0.745059
CUT044	CUTs	24	30	0	1	-2.77417	0.172561
CUT045	CUTs	11	7	0	0	-2.57029	0.395255
CUT046	CUTs	696	647	181	128	0.856608	0.000204834
CUT047	CUTs	79	39	7	3	-0.536695	0.585853
CUT048	CUTs	31	23	2	0	-1.811	0.302693
CUT049	CUTs	6	3	13	6	4.07473	1.15706e-05
CUT050	CUTs	60	56	4	4	-0.864859	0.380196
CUT051	CUTs	13	5	7	7	2.71901	0.0041783
CUT052	CUTs	2	0	5	0	4.28697	0.0527721
CUT053	CUTs	8	4	0	0	-1.95768	0.589558
CUT054	CUTs	32	26	2	3	-0.50572	0.714961
CUT055	CUTs	50	29	6	9	0.680788	0.437661
CUT056	CUTs	43	32	1	2	-1.60447	0.24887
CUT057	CUTs	25	18	4	1	-0.146437	0.929486
CUT058	CUTs	23	5	0	0	-3.09962	0.243637
CUT059	CUTs	44	36	15	5	0.947009	0.223399
CUT060	CUTs	4	4	1	1	0.994679	0.693302
CUT061	CUTs	45	35	16	8	1.23935	0.0685246
CUT062	CUTs	41	36	0	2	-2.21506	0.151271
CUT063	CUTs	5	7	4	4	2.38971	0.0567351
CUT064	CUTs	110	75	16	3	-0.334378	0.676952
CUT065	CUTs	86	61	11	4	-0.317836	0.712548
CUT066	CUTs	10	5	0	1	-0.787352	0.791052
CUT067	CUTs	18	17	5	8	1.60749	0.0848769
CUT068	CUTs	19	4	1	1	-0.380817	0.874099
CUT069	CUTs	0	1	0	0	1.37608	NA
CUT070	CUTs	196	147	99	76	2.03855	1.989e-14
CUT071	CUTs	9	4	0	0	-2.0602	0.55971
CUT072	CUTs	11	22	2	4	0.504709	0.734262
CUT073	CUTs	2	1	0	0	0.0421693	NA
CUT074	CUTs	4	4	8	6	3.79962	0.000233457
CUT075	CUTs	47	42	3	1	-1.51973	0.222204
CUT076	CUTs	24	23	2	4	0.0629579	0.96609
CUT077	CUTs	124	110	28	28	0.945669	0.0322734
CUT078	CUTs	44	39	2	1	-1.81864	0.179636
CUT079	CUTs	4	6	2	0	0.496081	0.861787
CUT080	CUTs	9	1	1	0	-0.185693	0.96116
CUT081	CUTs	22	11	0	0	-3.4171	0.157189
CUT082	CUTs	4	4	0	0	-1.45408	NA
CUT083	CUTs	45	53	0	0	-5.08824	0.00590008
CUT084	CUTs	122	84	0	0	-6.09614	0.000321573
CUT085	CUTs	80	73	1	2	-2.66936	0.021297
CUT086	CUTs	155	131	20	18	0.0915029	0.881738
CUT087	CUTs	81	97	4	2	-1.95542	0.0345038
CUT088	CUTs	41	52	2	1	-2.02419	0.125652
CUT089	CUTs	10	8	0	0	-2.59741	0.386362
CUT090	CUTs	62	17	69	57	3.76433	1.21912e-21
CUT091	CUTs	205	336	7	5	-2.5853	4.52911e-05
CUT092	CUTs	96	56	13	11	0.377593	0.589558
CUT093	CUTs	87	109	50	39	1.81783	3.6147e-06
CUT094	CUTs	18	7	0	0	-2.98945	0.267664
CUT095	CUTs	9	3	1	4	1.92023	0.22602
CUT096	CUTs	49	59	0	0	-5.23103	0.00411802
CUT097	CUTs	8	6	0	0	-2.22714	0.504594
CUT098	CUTs	24	12	1	1	-1.10816	0.571265
CUT099	CUTs	20	9	1	1	-0.784141	0.710242
CUT100	CUTs	19	30	4	2	-0.128658	0.93323
CUT101	CUTs	10	4	0	0	-2.15591	0.52961
CUT102	CUTs	31	27	0	0	-4.29562	0.0350261
CUT103	CUTs	29	18	1	3	-0.463132	0.770589
CUT104	CUTs	1	0	0	0	1.63578	NA
CUT105	CUTs	266	185	32	23	-0.0240614	0.963896
CUT106	CUTs	28	21	10	6	1.37734	0.0989659
CUT107	CUTs	18	18	9	6	1.70796	0.0510404
CUT108	CUTs	20	14	0	1	-2.02815	0.378173
CUT109	CUTs	17	14	1	2	-0.325814	0.865878
CUT110	CUTs	26	7	1	0	-1.94772	0.425156
CUT111	CUTs	17	11	1	0	-1.80136	0.464985
CUT112	CUTs	10	2	0	0	-1.87112	0.620252
CUT113	CUTs	35	25	15	11	1.80393	0.0053304
CUT114	CUTs	12	7	3	1	0.738624	0.683949
CUT115	CUTs	8	3	0	0	-1.80135	0.63796
CUT116	CUTs	7	7	0	1	-0.765044	0.797425
CUT117	CUTs	36	46	0	1	-3.38712	0.0709524
CUT118	CUTs	54	26	1	2	-1.64828	0.234721
CUT119	CUTs	14	9	4	3	1.30589	0.315965
CUT120	CUTs	1	3	0	0	-0.56804	NA
CUT121	CUTs	23	11	2	1	-0.467787	0.804511
CUT122	CUTs	0	1	0	0	1.37608	NA
CUT123	CUTs	17	28	2	1	-1.00837	0.545137
CUT124	CUTs	23	10	0	3	-0.269435	0.892743
CUT125	CUTs	58	41	5	1	-1.08151	0.336808
CUT126	CUTs	20	22	0	0	-3.85772	0.0799906
CUT127	CUTs	10	14	2	1	-0.0845111	0.968151
CUT128	CUTs	26	30	5	4	0.325107	0.788037
CUT129	CUTs	14	12	0	2	-0.599326	0.785928
CUT130	CUTs	26	10	0	0	-3.51436	0.138561
CUT131	CUTs	257	167	16	20	-0.507148	0.312967
CUT132	CUTs	11	7	1	0	-1.16722	0.678951
CUT133	CUTs	6	9	0	0	-2.40778	0.447912
CUT134	CUTs	15	4	0	0	-2.55735	0.405106
CUT135	CUTs	69	45	11	5	0.159984	0.864382
CUT136	CUTs	75	52	6	4	-0.65859	0.47518
CUT137	CUTs	38	65	3	0	-2.25205	0.0921471
CUT138	CUTs	3	2	0	0	-0.727775	NA
CUT139	CUTs	11	11	7	5	2.10332	0.0346182
CUT140	CUTs	9	2	0	0	-1.75374	0.653989
CUT141	CUTs	5	3	2	2	2.04724	0.251659
CUT142	CUTs	38	26	2	0	-2.04138	0.222584
CUT143	CUTs	128	104	9	5	-1.06848	0.122335
CUT144	CUTs	151	83	4	4	-1.82043	0.0212371
CUT145	CUTs	41	43	0	0	-4.85213	0.0104354
CUT146	CUTs	40	5	4	9	1.44765	0.179473
CUT147	CUTs	0	8	6	4	3.13298	0.0205478
CUT148	CUTs	344	312	127	86	1.35446	9.85264e-08
CUT149	CUTs	33	35	13	1	0.579447	0.586984
CUT150	CUTs	157	127	11	10	-0.751564	0.212521
CUT151	CUTs	14	9	5	3	1.48379	0.224789
CUT152	CUTs	4	2	0	0	-0.957734	NA
CUT153	CUTs	20	8	0	0	-3.15588	0.221564
CUT154	CUTs	22	22	4	3	0.322282	0.811025
CUT155	CUTs	25	14	5	7	1.37748	0.154153
CUT156	CUTs	28	42	3	1	-1.23618	0.366818
CUT157	CUTs	8	7	1	0	-0.942367	0.75327
CUT158	CUTs	88	46	42	26	2.04868	9.03873e-07
CUT159	CUTs	25	26	3	3	-0.102709	0.94587
CUT160	CUTs	74	16	7	4	0.0780472	0.950723
CUT161	CUTs	101	88	18	8	0.0966656	0.898123
CUT162	CUTs	0	0	0	0	NA	NA
CUT163	CUTs	26	22	26	11	2.58062	1.1632e-05
CUT164	CUTs	32	21	3	1	-0.742737	0.620095
CUT165	CUTs	4	10	0	0	-2.36011	0.46765
CUT166	CUTs	19	21	3	7	1.03861	0.34077
CUT167	CUTs	33	30	3	1	-1.02722	0.463561
CUT168	CUTs	13	5	0	0	-2.51439	0.416277
CUT169	CUTs	5	1	2	1	2.08145	0.342353
CUT170	CUTs	39	19	5	4	0.367321	0.757517
CUT171	CUTs	6	8	1	0	-0.89107	0.770589
CUT172	CUTs	55	35	2	1	-1.89657	0.154803
CUT173	CUTs	43	45	2	2	-1.48282	0.229714
CUT174	CUTs	36	31	2	1	-1.50745	0.298095
CUT175	CUTs	17	9	1	0	-1.67297	0.510067
CUT176	CUTs	4	0	0	0	-0.192463	NA
CUT177	CUTs	9	5	1	2	0.873375	0.663211
CUT178	CUTs	8	10	3	2	1.09866	0.487159
CUT179	CUTs	29	15	2	1	-0.846069	0.617043
CUT180	CUTs	0	0	1	0	4.38918	NA
CUT181	CUTs	14	11	9	8	2.45992	0.00311445
CUT182	CUTs	20	10	3	2	0.456571	0.777384
CUT183	CUTs	12	8	2	0	-0.39865	0.873839
CUT184	CUTs	7	6	1	0	-0.734925	0.813868
CUT185	CUTs	54	41	4	1	-1.28396	0.273033
CUT186	CUTs	26	27	2	1	-1.19218	0.445559
CUT187	CUTs	5	9	1	0	-0.922975	0.761605
CUT188	CUTs	74	32	1	0	-3.66345	0.0452677
CUT189	CUTs	88	53	9	2	-0.702873	0.441331
CUT190	CUTs	9	12	14	8	3.01023	0.000118808
CUT191	CUTs	356	314	46	29	-0.183476	0.657691
CUT192	CUTs	0	0	0	0	NA	NA
CUT193	CUTs	97	85	77	37	2.28234	4.27321e-11
CUT194	CUTs	7	8	0	0	-2.37675	0.456881
CUT195	CUTs	12	12	5	2	1.16046	0.38893
CUT196	CUTs	13	1	0	1	-0.54339	0.869209
CUT197	CUTs	91	38	20	7	0.762077	0.27553
CUT198	CUTs	16	11	1	1	-0.727041	0.733806
CUT199	CUTs	29	22	0	0	-4.09357	0.0520099
CUT200	CUTs	70	40	3	0	-2.21491	0.0884579
CUT201	CUTs	1	0	0	0	1.63578	NA
CUT202	CUTs	72	76	7	4	-0.797636	0.356332
CUT203	CUTs	7	16	0	1	-1.58303	0.533938
CUT204	CUTs	6	17	0	0	-3.08767	0.248332
CUT205	CUTs	294	279	24	23	-0.615663	0.155416
CUT206	CUTs	16	24	0	1	-2.35453	0.281426
CUT207	CUTs	32	30	12	3	0.870298	0.351314
CUT208	CUTs	14	18	4	1	0.211793	0.902513
CUT209	CUTs	2	0	0	0	0.795058	NA
CUT210	CUTs	1	0	1	2	4.68921	0.0669355
CUT211	CUTs	19	12	1	0	-1.94425	0.418911
CUT212	CUTs	1	1	0	1	2.09056	0.569363
CUT213	CUTs	16	20	0	1	-2.17979	0.331488
CUT214	CUTs	34	32	7	4	0.380035	0.723083
CUT215	CUTs	16	2	1	3	1.07008	0.56134
CUT216	CUTs	40	27	2	0	-2.10448	0.202557
CUT217	CUTs	13	20	2	1	-0.553989	0.766884
CUT218	CUTs	15	11	0	0	-3.11755	0.228384
CUT219	CUTs	15	8	7	4	1.95583	0.061653
CUT220	CUTs	62	48	6	2	-0.815315	0.425499
CUT221	CUTs	111	106	4	6	-1.4349	0.0594505
CUT222	CUTs	3	6	0	1	-0.186977	0.957366
CUT223	CUTs	3	7	0	0	-1.86816	0.619205
CUT224	CUTs	1	1	2	1	3.54736	0.130147
CUT225	CUTs	8	1	1	0	-0.0411317	0.992019
CUT226	CUTs	118	71	8	7	-0.617683	0.413874
CUT227	CUTs	19	17	3	5	0.867952	0.471525
CUT228	CUTs	57	42	11	7	0.538485	0.502793
CUT229	CUTs	11	9	2	1	0.237077	0.911762
CUT230	CUTs	0	0	0	0	NA	NA
CUT231	CUTs	50	24	0	1	-3.12273	0.105264
CUT232	CUTs	10	3	1	1	0.412061	0.87334
CUT233	CUTs	29	17	1	0	-2.5006	0.245876
CUT234	CUTs	696	461	105	72	0.305314	0.269076
CUT235	CUTs	482	403	58	49	-0.0467532	0.907374
CUT236	CUTs	38	23	0	1	-2.86732	0.150155
CUT237	CUTs	512	324	56	27	-0.334431	0.369394
CUT238	CUTs	2	1	0	0	0.0421693	NA
CUT239	CUTs	5	0	0	0	-0.513659	NA
CUT240	CUTs	4	5	0	0	-1.65015	NA
CUT241	CUTs	57	56	4	1	-1.56191	0.157089
CUT242	CUTs	5	6	0	0	-1.93496	0.596343
CUT243	CUTs	0	0	0	0	NA	NA
CUT244	CUTs	1	2	0	0	-0.11583	NA
CUT245	CUTs	7	3	0	0	-1.6778	NA
CUT246	CUTs	76	106	10	6	-0.586287	0.458077
CUT247	CUTs	13	7	63	31	5.22329	5.05937e-26
CUT248	CUTs	1	8	1	0	-0.394424	0.912828
CUT249	CUTs	37	35	5	1	-0.661516	0.601941
CUT250	CUTs	27	27	0	1	-2.74844	0.176376
CUT251	CUTs	29	18	3	7	0.864552	0.425401
CUT252	CUTs	13	11	3	3	1.01228	0.47149
CUT253	CUTs	98	56	0	0	-5.65462	0.00121156
CUT254	CUTs	23	34	0	3	-1.21862	0.434209
CUT255	CUTs	26	28	10	13	1.78012	0.0115719
CUT256	CUTs	15	10	7	7	2.20223	0.015488
CUT257	CUTs	99	86	9	7	-0.541228	0.469525
CUT258	CUTs	25	24	1	2	-1.01192	0.525524
CUT259	CUTs	6	1	0	0	-1.08088	NA
CUT260	CUTs	10	3	1	0	-0.625727	0.850166
CUT261	CUTs	6	1	0	0	-1.08088	NA
CUT262	CUTs	19	12	7	6	1.77898	0.056632
CUT263	CUTs	11	14	3	1	0.260773	0.890864
CUT264	CUTs	27	29	5	2	-0.0678362	0.962532
CUT265	CUTs	30	12	1	2	-0.688546	0.691204
CUT266	CUTs	76	43	7	9	0.173957	0.850166
CUT267	CUTs	36	10	0	0	-3.8364	0.0869075
CUT268	CUTs	17	13	2	3	0.459628	0.770589
CUT269	CUTs	82	44	8	6	-0.127688	0.894933
CUT270	CUTs	60	34	8	3	-0.0951352	0.93323
CUT271	CUTs	4	5	2	0	0.665616	0.811025
CUT272	CUTs	15	10	2	1	-0.061541	0.975817
CUT273	CUTs	13	5	0	0	-2.51439	0.416277
CUT274	CUTs	10	15	0	2	-0.602912	0.78684
CUT275	CUTs	7	16	3	3	0.976095	0.507604
CUT276	CUTs	19	16	1	3	-0.0663216	0.969433
CUT277	CUTs	4	8	0	0	-2.11625	0.544628
CUT278	CUTs	30	15	0	0	-3.86456	0.0788759
CUT279	CUTs	55	48	8	3	-0.274097	0.792067
CUT280	CUTs	11	6	3	0	0.423568	0.85509
CUT281	CUTs	235	185	100	87	1.84718	1.84504e-12
CUT282	CUTs	28	21	3	3	-0.00838535	0.996663
CUT283	CUTs	39	22	6	1	-0.154268	0.913178
CUT284	CUTs	32	25	21	15	2.33772	3.39378e-05
CUT285	CUTs	30	18	4	0	-0.648651	0.692402
CUT286	CUTs	48	22	0	0	-4.49234	0.0237008
CUT287	CUTs	92	61	2	6	-1.18107	0.191732
CUT288	CUTs	33	35	0	1	-3.09241	0.109991
CUT289	CUTs	4	1	104	121	8.55643	2.50143e-32
CUT290	CUTs	293	198	34	29	0.0633053	0.897688
CUT291	CUTs	229	186	14	19	-0.623376	0.2206
CUT292	CUTs	160	170	23	18	-0.0403444	0.950031
CUT293	CUTs	2	1	0	0	0.0421693	NA
CUT294	CUTs	7	3	0	0	-1.6778	NA
CUT295	CUTs	87	45	1	1	-2.99258	0.0313489
CUT296	CUTs	1	1	0	0	0.546977	NA
CUT297	CUTs	10	8	1	2	0.469769	0.816959
CUT298	CUTs	47	23	3	1	-1.10881	0.423729
CUT299	CUTs	82	66	5	5	-0.877443	0.308427
CUT300	CUTs	25	13	9	5	1.58156	0.0825054
CUT301	CUTs	85	43	3	4	-1.11835	0.258377
CUT302	CUTs	15	15	1	1	-0.922435	0.648923
CUT303	CUTs	79	58	2	1	-2.51686	0.0351773
CUT304	CUTs	11	5	0	0	-2.36219	0.462036
CUT305	CUTs	8	8	2	2	0.994821	0.57072
CUT306	CUTs	126	130	22	10	-0.060843	0.931228
CUT307	CUTs	0	3	0	0	-0.261647	NA
CUT308	CUTs	1	2	0	1	1.43335	0.689399
CUT309	CUTs	10	3	0	0	-2.02057	0.573836
CUT310	CUTs	9	4	2	0	0.251888	0.929141
CUT311	CUTs	31	19	1	1	-1.60644	0.361098
CUT312	CUTs	15	16	4	0	-0.0957338	0.962224
CUT313	CUTs	6	5	0	0	-1.89179	0.609181
CUT314	CUTs	151	362	13	19	-1.06146	0.391083
CUT315	CUTs	10	4	0	0	-2.15591	0.52961
CUT316	CUTs	7	12	12	8	3.009	0.00027976
CUT317	CUTs	9	4	1	1	0.37602	0.884476
CUT318	CUTs	1	0	0	0	1.63578	NA
CUT319	CUTs	33	11	1	0	-2.37818	0.285758
CUT320	CUTs	17	6	1	4	0.976664	0.535816
CUT321	CUTs	22	12	1	2	-0.414244	0.824132
CUT322	CUTs	54	35	0	1	-3.42692	0.0644011
CUT323	CUTs	29	18	25	21	3.00111	8.22285e-09
CUT324	CUTs	0	0	0	0	NA	NA
CUT325	CUTs	9	5	18	13	4.17045	5.23211e-09
CUT326	CUTs	43	27	52	39	3.40079	1.86277e-18
CUT327	CUTs	10	4	0	1	-0.662245	0.827944
CUT328	CUTs	54	45	3	3	-1.03931	0.341592
CUT329	CUTs	14	6	0	0	-2.67776	0.362448
CUT330	CUTs	15	9	0	0	-2.97846	0.268073
CUT331	CUTs	18	31	4	6	0.671007	0.554325
CUT332	CUTs	20	4	0	0	-2.87086	0.309243
CUT333	CUTs	57	52	1	1	-2.78168	0.0516585
CUT334	CUTs	11	16	3	0	-0.340125	0.872481
CUT335	CUTs	13	7	0	0	-2.70299	0.352685
CUT336	CUTs	10	21	0	0	-3.49065	0.147354
CUT337	CUTs	18	17	0	3	-0.445767	0.810517
CUT338	CUTs	0	0	0	1	4.57265	NA
CUT339	CUTs	14	25	8	4	1.19013	0.253227
CUT340	CUTs	88	55	4	2	-1.56427	0.108306
CUT341	CUTs	9	1	1	1	0.85241	0.746181
[truncated: 8,432 more rows]
